# Supplementary material for: Optimizing the electromagnetic wave absorption bandwidth of SiC/C aerogels using continuous multi-band absorption
Source: Royal Society of Chemistry journal article supplement (doi:10.1039/d5ta01693b), 2025-01-01
Supplement: d5ta01693b2.xlsx [file d5ta01693b2.xlsx]

## Sheet: Fig2(a)
2θ	Intensity	2θ	Intensity	2θ	Intensity	2θ	Intensity
degree	a.u.	degree	a.u.	degree	a.u.	degree	a.u.
	SN-800		SN-1350		SN-1450		SN-1550
10.0001	297	10.0001	315	10.0001	292	10.0001	274
10.0226	267	10.0226	297	10.0226	271	10.0226	262
10.0451	282	10.0451	308	10.0451	255	10.0451	250
10.0676	271	10.0676	334	10.0676	276	10.0676	257
10.0901	274	10.0901	303	10.0901	262	10.0901	242
10.1126	268	10.1126	282	10.1126	292	10.1126	269
10.1351	273	10.1351	353	10.1351	266	10.1351	250
10.1576	253	10.1576	311	10.1576	287	10.1576	269
10.1801	265	10.1801	314	10.1801	275	10.1801	239
10.2026	251	10.2026	304	10.2026	277	10.2026	301
10.2251	264	10.2251	321	10.2251	270	10.2251	252
10.2476	267	10.2476	280	10.2476	272	10.2476	271
10.2701	278	10.2701	300	10.2701	267	10.2701	247
10.2926	340	10.2926	334	10.2926	256	10.2926	261
10.3151	291	10.3151	295	10.3151	254	10.3151	251
10.3376	271	10.3376	295	10.3376	259	10.3376	295
10.3602	248	10.3602	311	10.3602	248	10.3602	263
10.3827	279	10.3827	285	10.3827	250	10.3827	269
10.4052	281	10.4052	318	10.4052	259	10.4052	257
10.4277	274	10.4277	311	10.4277	278	10.4277	268
10.4502	260	10.4502	304	10.4502	271	10.4502	287
10.4727	259	10.4727	317	10.4727	255	10.4727	261
10.4952	257	10.4952	294	10.4952	288	10.4952	240
10.5177	248	10.5177	284	10.5177	247	10.5177	257
10.5402	271	10.5402	282	10.5402	290	10.5402	279
10.5627	250	10.5627	306	10.5627	265	10.5627	272
10.5852	275	10.5852	299	10.5852	250	10.5852	275
10.6077	272	10.6077	325	10.6077	253	10.6077	231
10.6302	254	10.6302	315	10.6302	256	10.6302	269
10.6527	265	10.6527	315	10.6527	284	10.6527	267
10.6752	264	10.6752	312	10.6752	243	10.6752	255
10.6977	250	10.6977	280	10.6977	231	10.6977	243
10.7202	261	10.7202	291	10.7202	247	10.7202	267
10.7427	271	10.7427	300	10.7427	257	10.7427	266
10.7652	306	10.7652	300	10.7652	265	10.7652	255
10.7877	263	10.7877	309	10.7877	233	10.7877	255
10.8102	285	10.8102	287	10.8102	239	10.8102	241
10.8327	253	10.8327	299	10.8327	271	10.8327	251
10.8552	275	10.8552	293	10.8552	239	10.8552	252
10.8777	264	10.8777	296	10.8777	269	10.8777	242
10.9002	275	10.9002	311	10.9002	250	10.9002	254
10.9227	284	10.9227	296	10.9227	254	10.9227	259
10.9452	255	10.9452	308	10.9452	266	10.9452	290
10.9677	258	10.9677	287	10.9677	266	10.9677	258
10.9902	263	10.9902	322	10.9902	286	10.9902	243
11.0127	269	11.0127	285	11.0127	254	11.0127	249
11.0352	238	11.0352	280	11.0352	229	11.0352	281
11.0578	271	11.0578	282	11.0578	243	11.0578	276
11.0803	277	11.0803	289	11.0803	252	11.0803	245
11.1028	252	11.1028	310	11.1028	251	11.1028	297
11.1253	260	11.1253	274	11.1253	248	11.1253	229
11.1478	250	11.1478	295	11.1478	253	11.1478	265
11.1703	236	11.1703	288	11.1703	257	11.1703	218
11.1928	258	11.1928	295	11.1928	238	11.1928	235
11.2153	249	11.2153	267	11.2153	248	11.2153	252
11.2378	226	11.2378	279	11.2378	271	11.2378	241
11.2603	255	11.2603	319	11.2603	257	11.2603	230
11.2828	254	11.2828	313	11.2828	253	11.2828	246
11.3053	252	11.3053	306	11.3053	243	11.3053	270
11.3278	267	11.3278	300	11.3278	287	11.3278	282
11.3503	258	11.3503	302	11.3503	257	11.3503	255
11.3728	220	11.3728	269	11.3728	245	11.3728	244
11.3953	240	11.3953	272	11.3953	224	11.3953	244
11.4178	233	11.4178	277	11.4178	251	11.4178	266
11.4403	216	11.4403	282	11.4403	256	11.4403	213
11.4628	242	11.4628	280	11.4628	268	11.4628	231
11.4853	261	11.4853	304	11.4853	251	11.4853	251
11.5078	255	11.5078	310	11.5078	236	11.5078	252
11.5303	248	11.5303	303	11.5303	247	11.5303	232
11.5528	257	11.5528	310	11.5528	251	11.5528	253
11.5753	263	11.5753	286	11.5753	235	11.5753	252
11.5978	248	11.5978	283	11.5978	241	11.5978	246
11.6203	269	11.6203	321	11.6203	228	11.6203	245
11.6428	259	11.6428	309	11.6428	275	11.6428	246
11.6653	235	11.6653	286	11.6653	255	11.6653	225
11.6878	285	11.6878	310	11.6878	231	11.6878	233
11.7103	279	11.7103	304	11.7103	268	11.7103	241
11.7329	254	11.7329	302	11.7329	257	11.7329	220
11.7554	237	11.7554	275	11.7554	239	11.7554	220
11.7779	269	11.7779	281	11.7779	243	11.7779	263
11.8004	285	11.8004	282	11.8004	263	11.8004	261
11.8229	291	11.8229	236	11.8229	242	11.8229	240
11.8454	253	11.8454	316	11.8454	260	11.8454	245
11.8679	259	11.8679	267	11.8679	230	11.8679	282
11.8904	267	11.8904	297	11.8904	230	11.8904	233
11.9129	235	11.9129	292	11.9129	240	11.9129	260
11.9354	246	11.9354	273	11.9354	239	11.9354	240
11.9579	263	11.9579	308	11.9579	226	11.9579	243
11.9804	274	11.9804	280	11.9804	234	11.9804	260
12.0029	250	12.0029	294	12.0029	244	12.0029	237
12.0254	231	12.0254	288	12.0254	235	12.0254	248
12.0479	257	12.0479	272	12.0479	230	12.0479	228
12.0704	232	12.0704	292	12.0704	224	12.0704	223
12.0929	240	12.0929	308	12.0929	246	12.0929	234
12.1154	246	12.1154	292	12.1154	203	12.1154	255
12.1379	240	12.1379	310	12.1379	258	12.1379	261
12.1604	243	12.1604	317	12.1604	240	12.1604	236
12.1829	269	12.1829	306	12.1829	245	12.1829	240
12.2054	231	12.2054	291	12.2054	233	12.2054	231
12.2279	235	12.2279	276	12.2279	235	12.2279	234
12.2504	252	12.2504	292	12.2504	240	12.2504	213
12.2729	248	12.2729	276	12.2729	246	12.2729	228
12.2954	251	12.2954	292	12.2954	230	12.2954	217
12.3179	225	12.3179	290	12.3179	248	12.3179	232
12.3404	279	12.3404	290	12.3404	234	12.3404	243
12.3629	246	12.3629	269	12.3629	221	12.3629	218
12.3854	220	12.3854	284	12.3854	230	12.3854	245
12.4079	261	12.4079	306	12.4079	267	12.4079	239
12.4305	220	12.4305	312	12.4305	233	12.4305	254
12.453	237	12.453	284	12.453	211	12.453	248
12.4755	219	12.4755	291	12.4755	265	12.4755	214
12.498	257	12.498	259	12.498	274	12.498	236
12.5205	215	12.5205	294	12.5205	242	12.5205	229
12.543	229	12.543	264	12.543	245	12.543	246
12.5655	256	12.5655	273	12.5655	234	12.5655	248
12.588	257	12.588	279	12.588	257	12.588	219
12.6105	262	12.6105	274	12.6105	231	12.6105	224
12.633	234	12.633	292	12.633	232	12.633	229
12.6555	213	12.6555	264	12.6555	253	12.6555	243
12.678	226	12.678	257	12.678	236	12.678	260
12.7005	231	12.7005	300	12.7005	239	12.7005	228
12.723	233	12.723	291	12.723	241	12.723	218
12.7455	208	12.7455	256	12.7455	206	12.7455	226
12.768	238	12.768	291	12.768	239	12.768	260
12.7905	234	12.7905	269	12.7905	247	12.7905	243
12.813	245	12.813	282	12.813	248	12.813	228
12.8355	241	12.8355	302	12.8355	240	12.8355	207
12.858	241	12.858	318	12.858	244	12.858	243
12.8805	234	12.8805	268	12.8805	242	12.8805	247
12.903	250	12.903	291	12.903	226	12.903	221
12.9255	251	12.9255	276	12.9255	234	12.9255	209
12.948	213	12.948	265	12.948	289	12.948	238
12.9705	228	12.9705	270	12.9705	245	12.9705	258
12.993	237	12.993	300	12.993	240	12.993	268
13.0155	248	13.0155	270	13.0155	246	13.0155	258
13.038	244	13.038	281	13.038	237	13.038	236
13.0605	258	13.0605	272	13.0605	237	13.0605	230
13.083	213	13.083	283	13.083	247	13.083	228
13.1055	248	13.1055	277	13.1055	213	13.1055	228
13.1281	260	13.1281	295	13.1281	242	13.1281	245
13.1506	247	13.1506	277	13.1506	222	13.1506	228
13.1731	220	13.1731	293	13.1731	258	13.1731	216
13.1956	233	13.1956	278	13.1956	219	13.1956	256
13.2181	219	13.2181	290	13.2181	237	13.2181	238
13.2406	239	13.2406	260	13.2406	227	13.2406	244
13.2631	220	13.2631	273	13.2631	224	13.2631	239
13.2856	254	13.2856	264	13.2856	241	13.2856	185
13.3081	234	13.3081	294	13.3081	239	13.3081	219
13.3306	261	13.3306	304	13.3306	258	13.3306	250
13.3531	240	13.3531	268	13.3531	222	13.3531	243
13.3756	234	13.3756	276	13.3756	226	13.3756	202
13.3981	261	13.3981	254	13.3981	238	13.3981	250
13.4206	217	13.4206	289	13.4206	204	13.4206	219
13.4431	249	13.4431	305	13.4431	241	13.4431	239
13.4656	237	13.4656	275	13.4656	234	13.4656	257
13.4881	227	13.4881	267	13.4881	220	13.4881	218
13.5106	244	13.5106	274	13.5106	256	13.5106	242
13.5331	241	13.5331	271	13.5331	267	13.5331	218
13.5556	237	13.5556	252	13.5556	225	13.5556	238
13.5781	232	13.5781	289	13.5781	251	13.5781	226
13.6006	205	13.6006	315	13.6006	249	13.6006	224
13.6231	227	13.6231	277	13.6231	219	13.6231	232
13.6456	247	13.6456	275	13.6456	222	13.6456	246
13.6681	219	13.6681	290	13.6681	238	13.6681	244
13.6906	216	13.6906	283	13.6906	254	13.6906	238
13.7131	217	13.7131	322	13.7131	259	13.7131	241
13.7356	223	13.7356	263	13.7356	222	13.7356	223
13.7581	182	13.7581	278	13.7581	232	13.7581	236
13.7806	235	13.7806	276	13.7806	204	13.7806	218
13.8031	252	13.8031	289	13.8031	237	13.8031	245
13.8257	228	13.8257	275	13.8257	218	13.8257	192
13.8482	249	13.8482	278	13.8482	236	13.8482	230
13.8707	231	13.8707	265	13.8707	216	13.8707	229
13.8932	230	13.8932	281	13.8932	238	13.8932	236
13.9157	234	13.9157	265	13.9157	249	13.9157	238
13.9382	228	13.9382	299	13.9382	251	13.9382	222
13.9607	227	13.9607	278	13.9607	224	13.9607	245
13.9832	262	13.9832	279	13.9832	246	13.9832	225
14.0057	218	14.0057	290	14.0057	229	14.0057	229
14.0282	242	14.0282	268	14.0282	270	14.0282	225
14.0507	236	14.0507	264	14.0507	224	14.0507	237
14.0732	241	14.0732	300	14.0732	235	14.0732	223
14.0957	221	14.0957	279	14.0957	213	14.0957	240
14.1182	221	14.1182	277	14.1182	204	14.1182	245
14.1407	234	14.1407	275	14.1407	231	14.1407	225
14.1632	197	14.1632	266	14.1632	212	14.1632	252
14.1857	264	14.1857	248	14.1857	231	14.1857	242
14.2082	252	14.2082	279	14.2082	230	14.2082	204
14.2307	239	14.2307	245	14.2307	210	14.2307	223
14.2532	200	14.2532	274	14.2532	225	14.2532	229
14.2757	233	14.2757	282	14.2757	231	14.2757	248
14.2982	234	14.2982	269	14.2982	229	14.2982	207
14.3207	227	14.3207	262	14.3207	233	14.3207	240
14.3432	231	14.3432	286	14.3432	226	14.3432	211
14.3657	245	14.3657	276	14.3657	244	14.3657	254
14.3882	220	14.3882	281	14.3882	232	14.3882	227
14.4107	236	14.4107	247	14.4107	231	14.4107	218
14.4332	244	14.4332	264	14.4332	252	14.4332	255
14.4557	255	14.4557	283	14.4557	219	14.4557	231
14.4782	252	14.4782	290	14.4782	202	14.4782	245
14.5007	237	14.5007	271	14.5007	226	14.5007	254
14.5233	240	14.5233	288	14.5233	207	14.5233	221
14.5458	253	14.5458	254	14.5458	242	14.5458	232
14.5683	238	14.5683	273	14.5683	228	14.5683	261
14.5908	217	14.5908	291	14.5908	202	14.5908	227
14.6133	214	14.6133	309	14.6133	221	14.6133	238
14.6358	237	14.6358	296	14.6358	207	14.6358	204
14.6583	203	14.6583	269	14.6583	245	14.6583	220
14.6808	201	14.6808	254	14.6808	208	14.6808	246
14.7033	244	14.7033	264	14.7033	244	14.7033	213
14.7258	245	14.7258	298	14.7258	233	14.7258	231
14.7483	238	14.7483	279	14.7483	246	14.7483	209
14.7708	235	14.7708	302	14.7708	243	14.7708	224
14.7933	246	14.7933	242	14.7933	222	14.7933	222
14.8158	234	14.8158	282	14.8158	222	14.8158	218
14.8383	215	14.8383	296	14.8383	230	14.8383	241
14.8608	223	14.8608	282	14.8608	269	14.8608	209
14.8833	227	14.8833	275	14.8833	257	14.8833	236
14.9058	271	14.9058	262	14.9058	233	14.9058	234
14.9283	266	14.9283	288	14.9283	253	14.9283	228
14.9508	215	14.9508	277	14.9508	213	14.9508	223
14.9733	237	14.9733	290	14.9733	231	14.9733	249
14.9958	237	14.9958	289	14.9958	216	14.9958	240
15.0183	262	15.0183	270	15.0183	245	15.0183	236
15.0408	232	15.0408	263	15.0408	237	15.0408	210
15.0633	257	15.0633	266	15.0633	230	15.0633	254
15.0858	242	15.0858	272	15.0858	242	15.0858	205
15.1083	217	15.1083	276	15.1083	240	15.1083	202
15.1308	219	15.1308	288	15.1308	222	15.1308	233
15.1533	218	15.1533	269	15.1533	215	15.1533	233
15.1758	237	15.1758	323	15.1758	243	15.1758	225
15.1984	270	15.1984	274	15.1984	243	15.1984	218
15.2209	243	15.2209	303	15.2209	228	15.2209	230
15.2434	225	15.2434	288	15.2434	245	15.2434	231
15.2659	248	15.2659	271	15.2659	227	15.2659	230
15.2884	238	15.2884	282	15.2884	230	15.2884	243
15.3109	253	15.3109	252	15.3109	252	15.3109	267
15.3334	235	15.3334	280	15.3334	222	15.3334	230
15.3559	272	15.3559	279	15.3559	208	15.3559	225
15.3784	218	15.3784	296	15.3784	246	15.3784	247
15.4009	263	15.4009	276	15.4009	228	15.4009	228
15.4234	188	15.4234	343	15.4234	224	15.4234	231
15.4459	252	15.4459	283	15.4459	227	15.4459	237
15.4684	239	15.4684	316	15.4684	232	15.4684	260
15.4909	246	15.4909	261	15.4909	251	15.4909	232
15.5134	267	15.5134	276	15.5134	247	15.5134	230
15.5359	219	15.5359	250	15.5359	231	15.5359	217
15.5584	224	15.5584	287	15.5584	240	15.5584	235
15.5809	225	15.5809	255	15.5809	257	15.5809	266
15.6034	278	15.6034	267	15.6034	241	15.6034	225
15.6259	216	15.6259	275	15.6259	242	15.6259	218
15.6484	226	15.6484	278	15.6484	238	15.6484	239
15.6709	251	15.6709	297	15.6709	235	15.6709	257
15.6934	250	15.6934	275	15.6934	241	15.6934	250
15.7159	229	15.7159	282	15.7159	235	15.7159	242
15.7384	230	15.7384	298	15.7384	250	15.7384	233
15.7609	248	15.7609	298	15.7609	225	15.7609	225
15.7834	249	15.7834	296	15.7834	212	15.7834	246
15.8059	243	15.8059	253	15.8059	242	15.8059	273
15.8284	247	15.8284	272	15.8284	217	15.8284	238
15.8509	223	15.8509	288	15.8509	219	15.8509	238
15.8734	258	15.8734	291	15.8734	233	15.8734	245
15.896	243	15.896	295	15.896	269	15.896	225
15.9185	242	15.9185	314	15.9185	218	15.9185	235
15.941	245	15.941	288	15.941	243	15.941	247
15.9635	238	15.9635	301	15.9635	251	15.9635	250
15.986	271	15.986	292	15.986	243	15.986	240
16.0085	248	16.0085	323	16.0085	235	16.0085	219
16.031	222	16.031	292	16.031	252	16.031	261
16.0535	251	16.0535	287	16.0535	212	16.0535	259
16.076	239	16.076	294	16.076	249	16.076	246
16.0985	259	16.0985	281	16.0985	239	16.0985	249
16.121	256	16.121	279	16.121	238	16.121	222
16.1435	244	16.1435	288	16.1435	255	16.1435	259
16.166	250	16.166	276	16.166	230	16.166	236
16.1885	269	16.1885	307	16.1885	256	16.1885	241
16.211	251	16.211	285	16.211	277	16.211	244
16.2335	258	16.2335	325	16.2335	227	16.2335	263
16.256	265	16.256	278	16.256	243	16.256	273
16.2785	248	16.2785	332	16.2785	233	16.2785	243
16.301	243	16.301	326	16.301	232	16.301	228
16.3235	252	16.3235	282	16.3235	230	16.3235	243
16.346	300	16.346	275	16.346	247	16.346	257
16.3685	235	16.3685	299	16.3685	256	16.3685	222
16.391	245	16.391	323	16.391	254	16.391	234
16.4135	273	16.4135	271	16.4135	241	16.4135	252
16.436	255	16.436	280	16.436	233	16.436	244
16.4585	237	16.4585	304	16.4585	248	16.4585	243
16.481	243	16.481	310	16.481	258	16.481	268
16.5035	240	16.5035	329	16.5035	236	16.5035	235
16.526	258	16.526	276	16.526	264	16.526	246
16.5485	271	16.5485	279	16.5485	259	16.5485	256
16.571	264	16.571	326	16.571	256	16.571	241
16.5936	239	16.5936	308	16.5936	244	16.5936	259
16.6161	251	16.6161	329	16.6161	245	16.6161	236
16.6386	268	16.6386	295	16.6386	252	16.6386	245
16.6611	218	16.6611	305	16.6611	249	16.6611	219
16.6836	248	16.6836	304	16.6836	270	16.6836	250
16.7061	248	16.7061	309	16.7061	237	16.7061	232
16.7286	263	16.7286	310	16.7286	264	16.7286	263
16.7511	279	16.7511	321	16.7511	255	16.7511	258
16.7736	270	16.7736	292	16.7736	267	16.7736	252
16.7961	257	16.7961	329	16.7961	294	16.7961	238
16.8186	265	16.8186	289	16.8186	232	16.8186	265
16.8411	260	16.8411	329	16.8411	276	16.8411	266
16.8636	263	16.8636	300	16.8636	303	16.8636	257
16.8861	245	16.8861	304	16.8861	235	16.8861	240
16.9086	256	16.9086	326	16.9086	244	16.9086	266
16.9311	269	16.9311	303	16.9311	243	16.9311	251
16.9536	265	16.9536	321	16.9536	274	16.9536	269
16.9761	263	16.9761	327	16.9761	257	16.9761	263
16.9986	273	16.9986	329	16.9986	254	16.9986	261
17.0211	284	17.0211	288	17.0211	271	17.0211	264
17.0436	261	17.0436	346	17.0436	259	17.0436	273
17.0661	275	17.0661	306	17.0661	257	17.0661	254
17.0886	245	17.0886	338	17.0886	252	17.0886	262
17.1111	233	17.1111	339	17.1111	275	17.1111	224
17.1336	260	17.1336	334	17.1336	257	17.1336	272
17.1561	266	17.1561	332	17.1561	263	17.1561	263
17.1786	247	17.1786	307	17.1786	255	17.1786	264
17.2011	270	17.2011	330	17.2011	300	17.2011	245
17.2236	285	17.2236	324	17.2236	262	17.2236	246
17.2461	246	17.2461	324	17.2461	261	17.2461	281
17.2686	249	17.2686	338	17.2686	287	17.2686	278
17.2912	233	17.2912	308	17.2912	259	17.2912	257
17.3137	283	17.3137	319	17.3137	268	17.3137	265
17.3362	301	17.3362	334	17.3362	290	17.3362	260
17.3587	272	17.3587	346	17.3587	250	17.3587	259
17.3812	241	17.3812	310	17.3812	253	17.3812	264
17.4037	302	17.4037	325	17.4037	251	17.4037	288
17.4262	285	17.4262	338	17.4262	276	17.4262	261
17.4487	257	17.4487	307	17.4487	293	17.4487	265
17.4712	282	17.4712	348	17.4712	279	17.4712	277
17.4937	296	17.4937	337	17.4937	285	17.4937	285
17.5162	310	17.5162	318	17.5162	277	17.5162	285
17.5387	285	17.5387	326	17.5387	249	17.5387	250
17.5612	267	17.5612	331	17.5612	278	17.5612	249
17.5837	281	17.5837	403	17.5837	266	17.5837	272
17.6062	269	17.6062	371	17.6062	294	17.6062	257
17.6287	252	17.6287	372	17.6287	265	17.6287	268
17.6512	288	17.6512	342	17.6512	281	17.6512	262
17.6737	286	17.6737	365	17.6737	280	17.6737	280
17.6962	270	17.6962	357	17.6962	311	17.6962	249
17.7187	267	17.7187	331	17.7187	312	17.7187	257
17.7412	286	17.7412	355	17.7412	282	17.7412	289
17.7637	307	17.7637	352	17.7637	251	17.7637	254
17.7862	299	17.7862	329	17.7862	276	17.7862	289
17.8087	298	17.8087	334	17.8087	279	17.8087	261
17.8312	256	17.8312	380	17.8312	295	17.8312	234
17.8537	292	17.8537	360	17.8537	298	17.8537	283
17.8762	291	17.8762	358	17.8762	272	17.8762	299
17.8987	273	17.8987	351	17.8987	258	17.8987	269
17.9212	292	17.9212	356	17.9212	288	17.9212	267
17.9437	267	17.9437	350	17.9437	301	17.9437	282
17.9662	268	17.9662	380	17.9662	280	17.9662	306
17.9888	287	17.9888	365	17.9888	319	17.9888	294
18.0113	292	18.0113	348	18.0113	289	18.0113	272
18.0338	328	18.0338	329	18.0338	267	18.0338	296
18.0563	263	18.0563	349	18.0563	320	18.0563	286
18.0788	297	18.0788	353	18.0788	306	18.0788	253
18.1013	320	18.1013	368	18.1013	320	18.1013	291
18.1238	313	18.1238	352	18.1238	300	18.1238	268
18.1463	327	18.1463	361	18.1463	301	18.1463	270
18.1688	294	18.1688	328	18.1688	270	18.1688	300
18.1913	283	18.1913	361	18.1913	280	18.1913	291
18.2138	328	18.2138	355	18.2138	279	18.2138	298
18.2363	294	18.2363	376	18.2363	276	18.2363	320
18.2588	300	18.2588	351	18.2588	253	18.2588	302
18.2813	284	18.2813	399	18.2813	302	18.2813	306
18.3038	311	18.3038	339	18.3038	297	18.3038	309
18.3263	318	18.3263	364	18.3263	294	18.3263	310
18.3488	317	18.3488	352	18.3488	273	18.3488	310
18.3713	281	18.3713	385	18.3713	295	18.3713	301
18.3938	314	18.3938	365	18.3938	317	18.3938	287
18.4163	273	18.4163	347	18.4163	278	18.4163	269
18.4388	299	18.4388	352	18.4388	350	18.4388	297
18.4613	311	18.4613	359	18.4613	291	18.4613	291
18.4838	332	18.4838	345	18.4838	294	18.4838	318
18.5063	346	18.5063	361	18.5063	313	18.5063	307
18.5288	305	18.5288	355	18.5288	322	18.5288	297
18.5513	302	18.5513	377	18.5513	300	18.5513	288
18.5738	323	18.5738	393	18.5738	303	18.5738	317
18.5963	326	18.5963	337	18.5963	312	18.5963	305
18.6188	289	18.6188	327	18.6188	323	18.6188	305
18.6413	296	18.6413	382	18.6413	305	18.6413	308
18.6639	316	18.6639	393	18.6639	291	18.6639	281
18.6864	296	18.6864	363	18.6864	305	18.6864	296
18.7089	312	18.7089	404	18.7089	289	18.7089	298
18.7314	313	18.7314	389	18.7314	325	18.7314	333
18.7539	288	18.7539	396	18.7539	302	18.7539	341
18.7764	336	18.7764	381	18.7764	292	18.7764	306
18.7989	353	18.7989	375	18.7989	274	18.7989	280
18.8214	311	18.8214	377	18.8214	320	18.8214	336
18.8439	335	18.8439	400	18.8439	316	18.8439	328
18.8664	330	18.8664	409	18.8664	280	18.8664	337
18.8889	307	18.8889	362	18.8889	289	18.8889	309
18.9114	335	18.9114	402	18.9114	308	18.9114	330
18.9339	320	18.9339	376	18.9339	318	18.9339	352
18.9564	332	18.9564	369	18.9564	272	18.9564	339
18.9789	316	18.9789	391	18.9789	321	18.9789	340
19.0014	319	19.0014	382	19.0014	308	19.0014	311
19.0239	327	19.0239	380	19.0239	320	19.0239	279
19.0464	306	19.0464	408	19.0464	308	19.0464	332
19.0689	356	19.0689	370	19.0689	311	19.0689	310
19.0914	273	19.0914	403	19.0914	313	19.0914	325
19.1139	322	19.1139	394	19.1139	309	19.1139	286
19.1364	317	19.1364	396	19.1364	377	19.1364	327
19.1589	349	19.1589	412	19.1589	285	19.1589	354
19.1814	359	19.1814	404	19.1814	322	19.1814	326
19.2039	328	19.2039	412	19.2039	323	19.2039	374
19.2264	314	19.2264	406	19.2264	337	19.2264	290
19.2489	339	19.2489	397	19.2489	302	19.2489	314
19.2714	322	19.2714	416	19.2714	306	19.2714	316
19.2939	309	19.2939	393	19.2939	323	19.2939	339
19.3164	335	19.3164	413	19.3164	313	19.3164	315
19.3389	339	19.3389	418	19.3389	354	19.3389	339
19.3615	318	19.3615	405	19.3615	320	19.3615	317
19.384	349	19.384	405	19.384	313	19.384	318
19.4065	347	19.4065	369	19.4065	322	19.4065	326
19.429	330	19.429	402	19.429	310	19.429	314
19.4515	348	19.4515	410	19.4515	318	19.4515	321
19.474	356	19.474	410	19.474	349	19.474	333
19.4965	375	19.4965	403	19.4965	307	19.4965	309
19.519	345	19.519	386	19.519	327	19.519	343
19.5415	331	19.5415	423	19.5415	353	19.5415	349
19.564	317	19.564	410	19.564	338	19.564	360
19.5865	353	19.5865	421	19.5865	315	19.5865	347
19.609	359	19.609	438	19.609	306	19.609	341
19.6315	363	19.6315	413	19.6315	321	19.6315	351
19.654	358	19.654	425	19.654	348	19.654	372
19.6765	368	19.6765	443	19.6765	337	19.6765	341
19.699	331	19.699	450	19.699	307	19.699	324
19.7215	376	19.7215	422	19.7215	348	19.7215	334
19.744	358	19.744	392	19.744	356	19.744	350
19.7665	352	19.7665	432	19.7665	327	19.7665	359
19.789	338	19.789	435	19.789	355	19.789	324
19.8115	358	19.8115	432	19.8115	323	19.8115	370
19.834	347	19.834	428	19.834	338	19.834	334
19.8565	357	19.8565	423	19.8565	364	19.8565	355
19.879	373	19.879	459	19.879	353	19.879	342
19.9015	376	19.9015	457	19.9015	349	19.9015	331
19.924	377	19.924	454	19.924	368	19.924	361
19.9465	357	19.9465	445	19.9465	374	19.9465	343
19.969	375	19.969	415	19.969	362	19.969	338
19.9915	331	19.9915	429	19.9915	329	19.9915	343
20.014	380	20.014	463	20.014	352	20.014	368
20.0365	334	20.0365	457	20.0365	362	20.0365	368
20.0591	371	20.0591	455	20.0591	343	20.0591	370
20.0816	342	20.0816	472	20.0816	335	20.0816	383
20.1041	358	20.1041	440	20.1041	353	20.1041	367
20.1266	333	20.1266	428	20.1266	399	20.1266	359
20.1491	390	20.1491	447	20.1491	352	20.1491	358
20.1716	350	20.1716	410	20.1716	352	20.1716	363
20.1941	416	20.1941	426	20.1941	335	20.1941	347
20.2166	372	20.2166	415	20.2166	355	20.2166	330
20.2391	370	20.2391	484	20.2391	342	20.2391	409
20.2616	360	20.2616	406	20.2616	346	20.2616	355
20.2841	395	20.2841	475	20.2841	341	20.2841	360
20.3066	347	20.3066	432	20.3066	357	20.3066	368
20.3291	388	20.3291	468	20.3291	344	20.3291	312
20.3516	393	20.3516	431	20.3516	346	20.3516	346
20.3741	368	20.3741	452	20.3741	330	20.3741	311
20.3966	376	20.3966	445	20.3966	344	20.3966	353
20.4191	379	20.4191	472	20.4191	408	20.4191	346
20.4416	376	20.4416	456	20.4416	334	20.4416	409
20.4641	386	20.4641	450	20.4641	364	20.4641	389
20.4866	372	20.4866	462	20.4866	364	20.4866	359
20.5091	390	20.5091	457	20.5091	374	20.5091	322
20.5316	391	20.5316	459	20.5316	387	20.5316	330
20.5541	393	20.5541	469	20.5541	360	20.5541	345
20.5766	378	20.5766	467	20.5766	377	20.5766	372
20.5991	424	20.5991	432	20.5991	351	20.5991	364
20.6216	387	20.6216	452	20.6216	401	20.6216	370
20.6441	367	20.6441	456	20.6441	367	20.6441	364
20.6666	350	20.6666	426	20.6666	377	20.6666	372
20.6891	350	20.6891	457	20.6891	360	20.6891	380
20.7116	390	20.7116	424	20.7116	357	20.7116	360
20.7341	375	20.7341	454	20.7341	359	20.7341	358
20.7567	362	20.7567	454	20.7567	388	20.7567	375
20.7792	392	20.7792	463	20.7792	366	20.7792	362
20.8017	430	20.8017	436	20.8017	367	20.8017	395
20.8242	384	20.8242	483	20.8242	388	20.8242	344
20.8467	397	20.8467	419	20.8467	345	20.8467	376
20.8692	402	20.8692	431	20.8692	385	20.8692	339
20.8917	374	20.8917	450	20.8917	377	20.8917	350
20.9142	403	20.9142	448	20.9142	333	20.9142	387
20.9367	381	20.9367	456	20.9367	390	20.9367	388
20.9592	404	20.9592	445	20.9592	363	20.9592	367
20.9817	347	20.9817	500	20.9817	384	20.9817	349
21.0042	382	21.0042	422	21.0042	389	21.0042	368
21.0267	370	21.0267	460	21.0267	349	21.0267	383
21.0492	382	21.0492	462	21.0492	361	21.0492	348
21.0717	390	21.0717	463	21.0717	391	21.0717	343
21.0942	337	21.0942	463	21.0942	364	21.0942	385
21.1167	421	21.1167	498	21.1167	361	21.1167	362
21.1392	417	21.1392	477	21.1392	395	21.1392	374
21.1617	389	21.1617	472	21.1617	381	21.1617	399
21.1842	411	21.1842	454	21.1842	359	21.1842	346
21.2067	373	21.2067	427	21.2067	355	21.2067	347
21.2292	406	21.2292	455	21.2292	365	21.2292	376
21.2517	395	21.2517	478	21.2517	336	21.2517	359
21.2742	405	21.2742	482	21.2742	376	21.2742	353
21.2967	392	21.2967	484	21.2967	360	21.2967	361
21.3192	368	21.3192	476	21.3192	340	21.3192	379
21.3417	370	21.3417	447	21.3417	365	21.3417	359
21.3642	381	21.3642	461	21.3642	376	21.3642	376
21.3867	390	21.3867	436	21.3867	385	21.3867	358
21.4092	403	21.4092	461	21.4092	359	21.4092	361
21.4317	389	21.4317	441	21.4317	355	21.4317	369
21.4543	451	21.4543	443	21.4543	346	21.4543	364
21.4768	376	21.4768	476	21.4768	333	21.4768	342
21.4993	390	21.4993	453	21.4993	346	21.4993	383
21.5218	419	21.5218	423	21.5218	355	21.5218	355
21.5443	358	21.5443	428	21.5443	357	21.5443	372
21.5668	374	21.5668	459	21.5668	379	21.5668	372
21.5893	366	21.5893	471	21.5893	365	21.5893	353
21.6118	391	21.6118	481	21.6118	379	21.6118	370
21.6343	382	21.6343	485	21.6343	358	21.6343	397
21.6568	384	21.6568	467	21.6568	368	21.6568	363
21.6793	365	21.6793	453	21.6793	378	21.6793	386
21.7018	385	21.7018	473	21.7018	351	21.7018	344
21.7243	383	21.7243	435	21.7243	377	21.7243	370
21.7468	389	21.7468	460	21.7468	315	21.7468	417
21.7693	394	21.7693	493	21.7693	344	21.7693	362
21.7918	375	21.7918	461	21.7918	397	21.7918	363
21.8143	400	21.8143	424	21.8143	366	21.8143	361
21.8368	396	21.8368	424	21.8368	350	21.8368	369
21.8593	382	21.8593	451	21.8593	327	21.8593	358
21.8818	392	21.8818	456	21.8818	367	21.8818	358
21.9043	401	21.9043	432	21.9043	359	21.9043	337
21.9268	388	21.9268	468	21.9268	348	21.9268	403
21.9493	396	21.9493	450	21.9493	332	21.9493	359
21.9718	401	21.9718	435	21.9718	373	21.9718	355
21.9943	361	21.9943	431	21.9943	327	21.9943	369
22.0168	382	22.0168	486	22.0168	346	22.0168	366
22.0393	364	22.0393	450	22.0393	344	22.0393	377
22.0618	410	22.0618	478	22.0618	346	22.0618	369
22.0843	369	22.0843	437	22.0843	361	22.0843	378
22.1068	367	22.1068	452	22.1068	353	22.1068	352
22.1294	370	22.1294	433	22.1294	367	22.1294	343
22.1519	395	22.1519	439	22.1519	326	22.1519	388
22.1744	392	22.1744	448	22.1744	345	22.1744	368
22.1969	350	22.1969	459	22.1969	350	22.1969	398
22.2194	434	22.2194	408	22.2194	345	22.2194	345
22.2419	374	22.2419	442	22.2419	361	22.2419	376
22.2644	393	22.2644	430	22.2644	361	22.2644	371
22.2869	366	22.2869	445	22.2869	345	22.2869	352
22.3094	377	22.3094	492	22.3094	355	22.3094	326
22.3319	365	22.3319	423	22.3319	329	22.3319	313
22.3544	379	22.3544	430	22.3544	350	22.3544	346
22.3769	397	22.3769	454	22.3769	336	22.3769	353
22.3994	420	22.3994	428	22.3994	336	22.3994	306
22.4219	391	22.4219	424	22.4219	324	22.4219	351
22.4444	367	22.4444	450	22.4444	325	22.4444	337
22.4669	363	22.4669	422	22.4669	362	22.4669	360
22.4894	385	22.4894	459	22.4894	341	22.4894	368
22.5119	371	22.5119	418	22.5119	331	22.5119	345
22.5344	384	22.5344	448	22.5344	351	22.5344	371
22.5569	367	22.5569	459	22.5569	359	22.5569	336
22.5794	372	22.5794	423	22.5794	339	22.5794	344
22.6019	345	22.6019	461	22.6019	346	22.6019	336
22.6244	350	22.6244	415	22.6244	332	22.6244	330
22.6469	373	22.6469	426	22.6469	350	22.6469	374
22.6694	350	22.6694	435	22.6694	346	22.6694	336
22.6919	389	22.6919	429	22.6919	340	22.6919	320
22.7144	361	22.7144	436	22.7144	350	22.7144	343
22.7369	376	22.7369	424	22.7369	326	22.7369	367
22.7594	384	22.7594	429	22.7594	362	22.7594	368
22.7819	360	22.7819	422	22.7819	324	22.7819	315
22.8044	370	22.8044	447	22.8044	354	22.8044	298
22.827	368	22.827	421	22.827	298	22.827	330
22.8495	359	22.8495	431	22.8495	314	22.8495	319
22.872	368	22.872	418	22.872	304	22.872	354
22.8945	380	22.8945	465	22.8945	337	22.8945	325
22.917	378	22.917	379	22.917	318	22.917	341
22.9395	352	22.9395	464	22.9395	336	22.9395	308
22.962	395	22.962	425	22.962	317	22.962	328
22.9845	358	22.9845	420	22.9845	310	22.9845	349
23.007	396	23.007	393	23.007	320	23.007	309
23.0295	392	23.0295	442	23.0295	324	23.0295	349
23.052	342	23.052	406	23.052	294	23.052	316
23.0745	363	23.0745	410	23.0745	336	23.0745	317
23.097	367	23.097	432	23.097	337	23.097	324
23.1195	375	23.1195	419	23.1195	318	23.1195	315
23.142	384	23.142	403	23.142	337	23.142	332
23.1645	406	23.1645	391	23.1645	334	23.1645	351
23.187	377	23.187	397	23.187	325	23.187	348
23.2095	348	23.2095	386	23.2095	300	23.2095	314
23.232	369	23.232	449	23.232	331	23.232	317
23.2545	356	23.2545	433	23.2545	304	23.2545	324
23.277	385	23.277	428	23.277	332	23.277	324
23.2995	348	23.2995	421	23.2995	311	23.2995	332
23.322	337	23.322	386	23.322	326	23.322	329
23.3445	373	23.3445	438	23.3445	315	23.3445	335
23.367	360	23.367	424	23.367	310	23.367	356
23.3895	368	23.3895	414	23.3895	302	23.3895	323
23.412	352	23.412	396	23.412	303	23.412	289
23.4345	354	23.4345	439	23.4345	300	23.4345	299
23.457	353	23.457	402	23.457	302	23.457	320
23.4795	348	23.4795	415	23.4795	307	23.4795	303
23.502	327	23.502	413	23.502	274	23.502	334
23.5246	342	23.5246	405	23.5246	287	23.5246	287
23.5471	349	23.5471	405	23.5471	312	23.5471	313
23.5696	363	23.5696	378	23.5696	291	23.5696	296
23.5921	340	23.5921	412	23.5921	302	23.5921	296
23.6146	364	23.6146	399	23.6146	298	23.6146	318
23.6371	328	23.6371	391	23.6371	300	23.6371	325
23.6596	328	23.6596	418	23.6596	281	23.6596	308
23.6821	354	23.6821	448	23.6821	291	23.6821	303
23.7046	342	23.7046	398	23.7046	310	23.7046	343
23.7271	369	23.7271	425	23.7271	305	23.7271	352
23.7496	333	23.7496	408	23.7496	292	23.7496	300
23.7721	363	23.7721	389	23.7721	322	23.7721	309
23.7946	330	23.7946	373	23.7946	315	23.7946	308
23.8171	350	23.8171	387	23.8171	291	23.8171	306
23.8396	366	23.8396	366	23.8396	320	23.8396	299
23.8621	343	23.8621	396	23.8621	304	23.8621	287
23.8846	350	23.8846	374	23.8846	295	23.8846	279
23.9071	362	23.9071	364	23.9071	327	23.9071	302
23.9296	346	23.9296	393	23.9296	313	23.9296	297
23.9521	377	23.9521	371	23.9521	321	23.9521	318
23.9746	360	23.9746	396	23.9746	274	23.9746	289
23.9971	334	23.9971	400	23.9971	269	23.9971	283
24.0196	316	24.0196	385	24.0196	301	24.0196	338
24.0421	333	24.0421	379	24.0421	287	24.0421	325
24.0646	344	24.0646	390	24.0646	283	24.0646	302
24.0871	339	24.0871	372	24.0871	316	24.0871	288
24.1096	365	24.1096	393	24.1096	280	24.1096	282
24.1321	331	24.1321	348	24.1321	253	24.1321	272
24.1546	338	24.1546	373	24.1546	297	24.1546	299
24.1771	319	24.1771	362	24.1771	290	24.1771	308
24.1996	356	24.1996	378	24.1996	306	24.1996	307
24.2222	358	24.2222	390	24.2222	265	24.2222	297
24.2447	356	24.2447	391	24.2447	262	24.2447	285
24.2672	331	24.2672	363	24.2672	287	24.2672	290
24.2897	375	24.2897	374	24.2897	294	24.2897	251
24.3122	330	24.3122	357	24.3122	282	24.3122	262
24.3347	353	24.3347	377	24.3347	274	24.3347	292
24.3572	343	24.3572	356	24.3572	273	24.3572	285
24.3797	333	24.3797	406	24.3797	288	24.3797	246
24.4022	357	24.4022	340	24.4022	261	24.4022	279
24.4247	332	24.4247	380	24.4247	263	24.4247	255
24.4472	338	24.4472	377	24.4472	293	24.4472	273
24.4697	350	24.4697	338	24.4697	254	24.4697	247
24.4922	341	24.4922	364	24.4922	287	24.4922	290
24.5147	354	24.5147	378	24.5147	254	24.5147	252
24.5372	316	24.5372	377	24.5372	280	24.5372	257
24.5597	342	24.5597	361	24.5597	259	24.5597	268
24.5822	336	24.5822	386	24.5822	247	24.5822	263
24.6047	323	24.6047	366	24.6047	289	24.6047	263
24.6272	353	24.6272	364	24.6272	239	24.6272	286
24.6497	307	24.6497	377	24.6497	262	24.6497	301
24.6722	352	24.6722	379	24.6722	257	24.6722	272
24.6947	341	24.6947	343	24.6947	283	24.6947	268
24.7172	321	24.7172	352	24.7172	260	24.7172	292
24.7397	335	24.7397	350	24.7397	260	24.7397	262
24.7622	333	24.7622	322	24.7622	296	24.7622	264
24.7847	330	24.7847	355	24.7847	242	24.7847	273
24.8072	359	24.8072	338	24.8072	261	24.8072	286
24.8297	349	24.8297	367	24.8297	265	24.8297	255
24.8522	376	24.8522	347	24.8522	288	24.8522	294
24.8747	303	24.8747	338	24.8747	260	24.8747	231
24.8972	324	24.8972	363	24.8972	247	24.8972	268
24.9198	358	24.9198	355	24.9198	247	24.9198	272
24.9423	324	24.9423	356	24.9423	225	24.9423	262
24.9648	364	24.9648	383	24.9648	264	24.9648	256
24.9873	335	24.9873	334	24.9873	247	24.9873	238
25.0098	347	25.0098	301	25.0098	278	25.0098	285
25.0323	323	25.0323	354	25.0323	252	25.0323	251
25.0548	328	25.0548	349	25.0548	260	25.0548	260
25.0773	338	25.0773	369	25.0773	258	25.0773	256
25.0998	366	25.0998	319	25.0998	247	25.0998	248
25.1223	339	25.1223	325	25.1223	223	25.1223	255
25.1448	333	25.1448	371	25.1448	258	25.1448	266
25.1673	355	25.1673	344	25.1673	256	25.1673	257
25.1898	312	25.1898	338	25.1898	263	25.1898	278
25.2123	356	25.2123	360	25.2123	241	25.2123	238
25.2348	352	25.2348	358	25.2348	216	25.2348	230
25.2573	356	25.2573	344	25.2573	233	25.2573	250
25.2798	351	25.2798	333	25.2798	229	25.2798	243
25.3023	373	25.3023	322	25.3023	248	25.3023	263
25.3248	342	25.3248	330	25.3248	249	25.3248	273
25.3473	354	25.3473	365	25.3473	242	25.3473	249
25.3698	357	25.3698	380	25.3698	218	25.3698	258
25.3923	338	25.3923	315	25.3923	245	25.3923	247
25.4148	355	25.4148	382	25.4148	239	25.4148	251
25.4373	357	25.4373	349	25.4373	225	25.4373	263
25.4598	349	25.4598	353	25.4598	258	25.4598	218
25.4823	334	25.4823	342	25.4823	222	25.4823	273
25.5048	382	25.5048	350	25.5048	227	25.5048	250
25.5273	342	25.5273	366	25.5273	213	25.5273	281
25.5498	358	25.5498	330	25.5498	261	25.5498	243
25.5723	348	25.5723	338	25.5723	250	25.5723	213
25.5949	342	25.5949	345	25.5949	262	25.5949	233
25.6174	357	25.6174	349	25.6174	193	25.6174	239
25.6399	325	25.6399	324	25.6399	231	25.6399	255
25.6624	343	25.6624	382	25.6624	225	25.6624	231
25.6849	354	25.6849	356	25.6849	222	25.6849	218
25.7074	384	25.7074	379	25.7074	247	25.7074	226
25.7299	350	25.7299	294	25.7299	206	25.7299	251
25.7524	344	25.7524	311	25.7524	189	25.7524	229
25.7749	344	25.7749	349	25.7749	230	25.7749	240
25.7974	363	25.7974	346	25.7974	227	25.7974	242
25.8199	368	25.8199	318	25.8199	229	25.8199	237
25.8424	336	25.8424	329	25.8424	219	25.8424	264
25.8649	327	25.8649	339	25.8649	216	25.8649	244
25.8874	348	25.8874	337	25.8874	211	25.8874	267
25.9099	369	25.9099	348	25.9099	232	25.9099	192
25.9324	377	25.9324	334	25.9324	231	25.9324	236
25.9549	339	25.9549	322	25.9549	226	25.9549	257
25.9774	359	25.9774	312	25.9774	216	25.9774	236
25.9999	330	25.9999	312	25.9999	229	25.9999	256
26.0224	359	26.0224	322	26.0224	235	26.0224	236
26.0449	325	26.0449	342	26.0449	216	26.0449	205
26.0674	339	26.0674	315	26.0674	246	26.0674	220
26.0899	369	26.0899	327	26.0899	212	26.0899	198
26.1124	328	26.1124	324	26.1124	187	26.1124	205
26.1349	352	26.1349	333	26.1349	255	26.1349	214
26.1574	323	26.1574	317	26.1574	216	26.1574	218
26.1799	399	26.1799	330	26.1799	214	26.1799	213
26.2024	343	26.2024	324	26.2024	209	26.2024	229
26.2249	330	26.2249	311	26.2249	216	26.2249	227
26.2474	335	26.2474	328	26.2474	216	26.2474	208
26.2699	349	26.2699	328	26.2699	228	26.2699	216
26.2925	361	26.2925	326	26.2925	230	26.2925	239
26.315	294	26.315	361	26.315	221	26.315	234
26.3375	329	26.3375	320	26.3375	221	26.3375	241
26.36	323	26.36	303	26.36	241	26.36	199
26.3825	320	26.3825	305	26.3825	213	26.3825	222
26.405	314	26.405	276	26.405	213	26.405	195
26.4275	334	26.4275	275	26.4275	230	26.4275	216
26.45	314	26.45	347	26.45	224	26.45	193
26.4725	334	26.4725	328	26.4725	214	26.4725	197
26.495	368	26.495	309	26.495	195	26.495	212
26.5175	336	26.5175	340	26.5175	215	26.5175	201
26.54	315	26.54	331	26.54	212	26.54	211
26.5625	334	26.5625	295	26.5625	211	26.5625	198
26.585	327	26.585	306	26.585	190	26.585	207
26.6075	328	26.6075	289	26.6075	207	26.6075	232
26.63	353	26.63	273	26.63	228	26.63	207
26.6525	335	26.6525	302	26.6525	209	26.6525	225
26.675	295	26.675	277	26.675	263	26.675	218
26.6975	313	26.6975	307	26.6975	260	26.6975	193
26.72	307	26.72	347	26.72	246	26.72	199
26.7425	298	26.7425	351	26.7425	240	26.7425	185
26.765	334	26.765	350	26.765	277	26.765	194
26.7875	305	26.7875	345	26.7875	231	26.7875	220
26.81	305	26.81	309	26.81	228	26.81	195
26.8325	316	26.8325	320	26.8325	251	26.8325	205
26.855	299	26.855	341	26.855	204	26.855	226
26.8775	298	26.8775	333	26.8775	194	26.8775	196
26.9	317	26.9	272	26.9	217	26.9	198
26.9225	327	26.9225	276	26.9225	201	26.9225	209
26.945	271	26.945	281	26.945	223	26.945	210
26.9675	316	26.9675	289	26.9675	215	26.9675	202
26.9901	271	26.9901	357	26.9901	213	26.9901	188
27.0126	260	27.0126	307	27.0126	204	27.0126	191
27.0351	321	27.0351	308	27.0351	190	27.0351	190
27.0576	299	27.0576	281	27.0576	179	27.0576	207
27.0801	273	27.0801	268	27.0801	220	27.0801	196
27.1026	299	27.1026	259	27.1026	176	27.1026	195
27.1251	261	27.1251	251	27.1251	201	27.1251	221
27.1476	279	27.1476	276	27.1476	191	27.1476	216
27.1701	239	27.1701	269	27.1701	194	27.1701	183
27.1926	236	27.1926	283	27.1926	212	27.1926	217
27.2151	257	27.2151	266	27.2151	175	27.2151	205
27.2376	281	27.2376	254	27.2376	202	27.2376	185
27.2601	277	27.2601	282	27.2601	197	27.2601	198
27.2826	278	27.2826	268	27.2826	186	27.2826	182
27.3051	235	27.3051	270	27.3051	190	27.3051	202
27.3276	257	27.3276	270	27.3276	175	27.3276	190
27.3501	228	27.3501	282	27.3501	179	27.3501	175
27.3726	240	27.3726	260	27.3726	200	27.3726	186
27.3951	273	27.3951	262	27.3951	203	27.3951	186
27.4176	274	27.4176	289	27.4176	224	27.4176	165
27.4401	281	27.4401	239	27.4401	193	27.4401	175
27.4626	265	27.4626	232	27.4626	188	27.4626	177
27.4851	266	27.4851	253	27.4851	183	27.4851	184
27.5076	248	27.5076	252	27.5076	181	27.5076	194
27.5301	247	27.5301	254	27.5301	184	27.5301	177
27.5526	264	27.5526	244	27.5526	168	27.5526	220
27.5751	281	27.5751	237	27.5751	207	27.5751	208
27.5976	254	27.5976	242	27.5976	215	27.5976	189
27.6201	266	27.6201	275	27.6201	160	27.6201	180
27.6426	237	27.6426	238	27.6426	212	27.6426	180
27.6651	259	27.6651	251	27.6651	183	27.6651	224
27.6877	240	27.6877	258	27.6877	189	27.6877	167
27.7102	253	27.7102	244	27.7102	184	27.7102	223
27.7327	237	27.7327	241	27.7327	172	27.7327	208
27.7552	243	27.7552	261	27.7552	183	27.7552	181
27.7777	256	27.7777	245	27.7777	173	27.7777	188
27.8002	225	27.8002	242	27.8002	193	27.8002	209
27.8227	248	27.8227	241	27.8227	188	27.8227	195
27.8452	235	27.8452	241	27.8452	188	27.8452	205
27.8677	247	27.8677	247	27.8677	175	27.8677	166
27.8902	269	27.8902	264	27.8902	163	27.8902	202
27.9127	233	27.9127	219	27.9127	182	27.9127	199
27.9352	210	27.9352	252	27.9352	166	27.9352	194
27.9577	243	27.9577	206	27.9577	175	27.9577	185
27.9802	212	27.9802	250	27.9802	171	27.9802	181
28.0027	219	28.0027	232	28.0027	186	28.0027	195
28.0252	260	28.0252	196	28.0252	179	28.0252	195
28.0477	227	28.0477	248	28.0477	194	28.0477	193
28.0702	215	28.0702	231	28.0702	176	28.0702	195
28.0927	225	28.0927	222	28.0927	190	28.0927	179
28.1152	245	28.1152	208	28.1152	194	28.1152	193
28.1377	238	28.1377	257	28.1377	188	28.1377	169
28.1602	206	28.1602	227	28.1602	157	28.1602	171
28.1827	233	28.1827	225	28.1827	189	28.1827	161
28.2052	222	28.2052	208	28.2052	179	28.2052	152
28.2277	208	28.2277	236	28.2277	164	28.2277	168
28.2502	201	28.2502	232	28.2502	173	28.2502	167
28.2727	195	28.2727	244	28.2727	155	28.2727	180
28.2952	220	28.2952	216	28.2952	168	28.2952	177
28.3177	237	28.3177	228	28.3177	183	28.3177	165
28.3402	194	28.3402	224	28.3402	161	28.3402	167
28.3627	191	28.3627	231	28.3627	175	28.3627	180
28.3853	222	28.3853	244	28.3853	169	28.3853	183
28.4078	218	28.4078	220	28.4078	183	28.4078	184
28.4303	216	28.4303	233	28.4303	165	28.4303	176
28.4528	221	28.4528	230	28.4528	177	28.4528	178
28.4753	219	28.4753	224	28.4753	170	28.4753	175
28.4978	183	28.4978	238	28.4978	173	28.4978	188
28.5203	199	28.5203	218	28.5203	163	28.5203	152
28.5428	206	28.5428	195	28.5428	190	28.5428	156
28.5653	204	28.5653	203	28.5653	166	28.5653	195
28.5878	187	28.5878	211	28.5878	168	28.5878	181
28.6103	224	28.6103	204	28.6103	181	28.6103	170
28.6328	198	28.6328	226	28.6328	160	28.6328	145
28.6553	186	28.6553	216	28.6553	169	28.6553	166
28.6778	197	28.6778	217	28.6778	172	28.6778	165
28.7003	230	28.7003	214	28.7003	174	28.7003	175
28.7228	207	28.7228	215	28.7228	171	28.7228	162
28.7453	202	28.7453	216	28.7453	183	28.7453	172
28.7678	195	28.7678	211	28.7678	169	28.7678	167
28.7903	190	28.7903	231	28.7903	158	28.7903	168
28.8128	213	28.8128	211	28.8128	168	28.8128	198
28.8353	192	28.8353	197	28.8353	168	28.8353	158
28.8578	193	28.8578	199	28.8578	166	28.8578	164
28.8803	188	28.8803	214	28.8803	185	28.8803	144
28.9028	184	28.9028	202	28.9028	197	28.9028	167
28.9253	202	28.9253	210	28.9253	183	28.9253	184
28.9478	208	28.9478	220	28.9478	194	28.9478	167
28.9703	199	28.9703	225	28.9703	153	28.9703	186
28.9928	214	28.9928	193	28.9928	164	28.9928	160
29.0153	220	29.0153	210	29.0153	190	29.0153	168
29.0378	195	29.0378	229	29.0378	172	29.0378	169
29.0604	174	29.0604	197	29.0604	175	29.0604	173
29.0829	178	29.0829	197	29.0829	174	29.0829	161
29.1054	194	29.1054	195	29.1054	150	29.1054	150
29.1279	187	29.1279	221	29.1279	174	29.1279	151
29.1504	195	29.1504	218	29.1504	163	29.1504	176
29.1729	196	29.1729	183	29.1729	145	29.1729	171
29.1954	179	29.1954	195	29.1954	158	29.1954	155
29.2179	198	29.2179	203	29.2179	172	29.2179	163
29.2404	184	29.2404	171	29.2404	184	29.2404	169
29.2629	189	29.2629	211	29.2629	167	29.2629	183
29.2854	198	29.2854	188	29.2854	175	29.2854	121
29.3079	202	29.3079	204	29.3079	150	29.3079	151
29.3304	185	29.3304	189	29.3304	173	29.3304	158
29.3529	186	29.3529	196	29.3529	148	29.3529	159
29.3754	192	29.3754	210	29.3754	178	29.3754	206
29.3979	189	29.3979	188	29.3979	159	29.3979	158
29.4204	192	29.4204	219	29.4204	169	29.4204	161
29.4429	180	29.4429	195	29.4429	162	29.4429	181
29.4654	181	29.4654	196	29.4654	144	29.4654	153
29.4879	190	29.4879	199	29.4879	167	29.4879	139
29.5104	202	29.5104	178	29.5104	153	29.5104	163
29.5329	192	29.5329	209	29.5329	162	29.5329	171
29.5554	197	29.5554	176	29.5554	147	29.5554	171
29.5779	191	29.5779	198	29.5779	145	29.5779	142
29.6004	196	29.6004	184	29.6004	145	29.6004	155
29.6229	188	29.6229	204	29.6229	183	29.6229	177
29.6454	171	29.6454	206	29.6454	152	29.6454	186
29.6679	178	29.6679	175	29.6679	140	29.6679	187
29.6904	183	29.6904	203	29.6904	160	29.6904	154
29.7129	181	29.7129	167	29.7129	158	29.7129	152
29.7354	185	29.7354	217	29.7354	162	29.7354	174
29.758	180	29.758	184	29.758	154	29.758	159
29.7805	188	29.7805	215	29.7805	157	29.7805	158
29.803	185	29.803	193	29.803	139	29.803	140
29.8255	185	29.8255	199	29.8255	148	29.8255	176
29.848	195	29.848	187	29.848	175	29.848	150
29.8705	193	29.8705	196	29.8705	180	29.8705	160
29.893	195	29.893	205	29.893	155	29.893	151
29.9155	194	29.9155	174	29.9155	119	29.9155	168
29.938	200	29.938	197	29.938	174	29.938	163
29.9605	178	29.9605	200	29.9605	136	29.9605	159
29.983	220	29.983	192	29.983	143	29.983	174
30.0055	175	30.0055	195	30.0055	168	30.0055	179
30.028	170	30.028	194	30.028	150	30.028	156
30.0505	203	30.0505	207	30.0505	182	30.0505	149
30.073	157	30.073	209	30.073	151	30.073	148
30.0955	159	30.0955	181	30.0955	151	30.0955	161
30.118	205	30.118	197	30.118	154	30.118	155
30.1405	202	30.1405	181	30.1405	177	30.1405	158
30.163	167	30.163	178	30.163	162	30.163	169
30.1855	167	30.1855	196	30.1855	146	30.1855	148
30.208	203	30.208	177	30.208	169	30.208	142
30.2305	185	30.2305	215	30.2305	150	30.2305	163
30.253	180	30.253	190	30.253	152	30.253	172
30.2755	205	30.2755	189	30.2755	148	30.2755	149
30.298	170	30.298	178	30.298	149	30.298	168
30.3205	177	30.3205	186	30.3205	140	30.3205	132
30.343	191	30.343	183	30.343	167	30.343	152
30.3655	173	30.3655	176	30.3655	162	30.3655	141
30.388	180	30.388	185	30.388	136	30.388	147
30.4105	179	30.4105	194	30.4105	136	30.4105	150
30.433	182	30.433	175	30.433	157	30.433	165
30.4556	176	30.4556	196	30.4556	122	30.4556	164
30.4781	194	30.4781	193	30.4781	147	30.4781	134
30.5006	197	30.5006	162	30.5006	145	30.5006	156
30.5231	168	30.5231	171	30.5231	128	30.5231	120
30.5456	210	30.5456	187	30.5456	138	30.5456	147
30.5681	185	30.5681	193	30.5681	163	30.5681	148
30.5906	178	30.5906	190	30.5906	146	30.5906	141
30.6131	157	30.6131	189	30.6131	130	30.6131	148
30.6356	190	30.6356	167	30.6356	146	30.6356	148
30.6581	167	30.6581	170	30.6581	158	30.6581	135
30.6806	184	30.6806	180	30.6806	152	30.6806	142
30.7031	187	30.7031	160	30.7031	130	30.7031	148
30.7256	155	30.7256	183	30.7256	154	30.7256	147
30.7481	164	30.7481	168	30.7481	151	30.7481	135
30.7706	205	30.7706	191	30.7706	129	30.7706	159
30.7931	146	30.7931	196	30.7931	148	30.7931	151
30.8156	180	30.8156	166	30.8156	142	30.8156	134
30.8381	168	30.8381	166	30.8381	115	30.8381	129
30.8606	166	30.8606	154	30.8606	147	30.8606	157
30.8831	176	30.8831	200	30.8831	153	30.8831	171
30.9056	167	30.9056	174	30.9056	153	30.9056	134
30.9281	176	30.9281	173	30.9281	137	30.9281	167
30.9506	179	30.9506	210	30.9506	139	30.9506	129
30.9731	180	30.9731	160	30.9731	129	30.9731	146
30.9956	178	30.9956	156	30.9956	142	30.9956	135
31.0181	175	31.0181	177	31.0181	138	31.0181	144
31.0406	163	31.0406	193	31.0406	152	31.0406	147
31.0631	190	31.0631	156	31.0631	136	31.0631	154
31.0856	200	31.0856	163	31.0856	155	31.0856	152
31.1081	182	31.1081	168	31.1081	134	31.1081	142
31.1306	187	31.1306	168	31.1306	143	31.1306	148
31.1532	187	31.1532	161	31.1532	124	31.1532	147
31.1757	184	31.1757	184	31.1757	153	31.1757	153
31.1982	148	31.1982	170	31.1982	136	31.1982	141
31.2207	162	31.2207	169	31.2207	143	31.2207	153
31.2432	165	31.2432	168	31.2432	148	31.2432	147
31.2657	169	31.2657	172	31.2657	140	31.2657	139
31.2882	161	31.2882	156	31.2882	127	31.2882	137
31.3107	169	31.3107	159	31.3107	155	31.3107	141
31.3332	172	31.3332	165	31.3332	149	31.3332	129
31.3557	164	31.3557	168	31.3557	147	31.3557	158
31.3782	171	31.3782	180	31.3782	144	31.3782	151
31.4007	161	31.4007	162	31.4007	152	31.4007	124
31.4232	159	31.4232	139	31.4232	137	31.4232	144
31.4457	158	31.4457	154	31.4457	124	31.4457	119
31.4682	144	31.4682	191	31.4682	129	31.4682	134
31.4907	192	31.4907	176	31.4907	140	31.4907	144
31.5132	190	31.5132	158	31.5132	142	31.5132	142
31.5357	181	31.5357	173	31.5357	129	31.5357	146
31.5582	213	31.5582	175	31.5582	122	31.5582	147
31.5807	192	31.5807	171	31.5807	136	31.5807	152
31.6032	169	31.6032	165	31.6032	123	31.6032	129
31.6257	221	31.6257	191	31.6257	135	31.6257	159
31.6482	168	31.6482	169	31.6482	127	31.6482	158
31.6707	198	31.6707	166	31.6707	134	31.6707	150
31.6932	199	31.6932	184	31.6932	126	31.6932	135
31.7157	199	31.7157	167	31.7157	144	31.7157	150
31.7382	239	31.7382	182	31.7382	137	31.7382	149
31.7607	280	31.7607	162	31.7607	142	31.7607	133
31.7832	239	31.7832	195	31.7832	139	31.7832	141
31.8057	275	31.8057	159	31.8057	152	31.8057	154
31.8282	300	31.8282	140	31.8282	115	31.8282	143
31.8508	254	31.8508	155	31.8508	152	31.8508	146
31.8733	258	31.8733	177	31.8733	115	31.8733	154
31.8958	248	31.8958	149	31.8958	137	31.8958	139
31.9183	238	31.9183	166	31.9183	138	31.9183	134
31.9408	237	31.9408	180	31.9408	144	31.9408	116
31.9633	234	31.9633	211	31.9633	156	31.9633	137
31.9858	237	31.9858	175	31.9858	138	31.9858	160
32.0083	238	32.0083	158	32.0083	152	32.0083	148
32.0308	226	32.0308	163	32.0308	149	32.0308	131
32.0533	213	32.0533	158	32.0533	126	32.0533	140
32.0758	216	32.0758	143	32.0758	137	32.0758	156
32.0983	222	32.0983	159	32.0983	123	32.0983	142
32.1208	188	32.1208	182	32.1208	132	32.1208	141
32.1433	170	32.1433	152	32.1433	132	32.1433	130
32.1658	201	32.1658	138	32.1658	117	32.1658	99
32.1883	204	32.1883	182	32.1883	139	32.1883	138
32.2108	195	32.2108	184	32.2108	141	32.2108	134
32.2333	183	32.2333	186	32.2333	125	32.2333	150
32.2558	176	32.2558	153	32.2558	129	32.2558	148
32.2783	175	32.2783	202	32.2783	116	32.2783	123
32.3008	161	32.3008	170	32.3008	112	32.3008	131
32.3233	163	32.3233	166	32.3233	128	32.3233	155
32.3458	172	32.3458	141	32.3458	152	32.3458	149
32.3683	160	32.3683	154	32.3683	131	32.3683	130
32.3908	153	32.3908	158	32.3908	133	32.3908	130
32.4133	162	32.4133	143	32.4133	147	32.4133	122
32.4358	158	32.4358	170	32.4358	136	32.4358	144
32.4583	150	32.4583	150	32.4583	146	32.4583	140
32.4808	167	32.4808	154	32.4808	132	32.4808	121
32.5033	181	32.5033	162	32.5033	135	32.5033	121
32.5259	144	32.5259	160	32.5259	141	32.5259	133
32.5484	156	32.5484	168	32.5484	130	32.5484	151
32.5709	145	32.5709	160	32.5709	114	32.5709	115
32.5934	150	32.5934	171	32.5934	123	32.5934	107
32.6159	158	32.6159	143	32.6159	136	32.6159	127
32.6384	155	32.6384	134	32.6384	119	32.6384	124
32.6609	173	32.6609	162	32.6609	132	32.6609	138
32.6834	172	32.6834	160	32.6834	130	32.6834	142
32.7059	167	32.7059	164	32.7059	131	32.7059	138
32.7284	156	32.7284	167	32.7284	139	32.7284	135
32.7509	146	32.7509	149	32.7509	138	32.7509	122
32.7734	135	32.7734	174	32.7734	153	32.7734	131
32.7959	158	32.7959	132	32.7959	149	32.7959	133
32.8184	151	32.8184	162	32.8184	120	32.8184	127
32.8409	169	32.8409	167	32.8409	144	32.8409	127
32.8634	161	32.8634	158	32.8634	124	32.8634	139
32.8859	141	32.8859	165	32.8859	120	32.8859	126
32.9084	159	32.9084	148	32.9084	130	32.9084	138
32.9309	152	32.9309	184	32.9309	136	32.9309	130
32.9534	149	32.9534	182	32.9534	129	32.9534	136
32.9759	147	32.9759	166	32.9759	147	32.9759	125
32.9984	173	32.9984	142	32.9984	137	32.9984	131
33.0209	155	33.0209	150	33.0209	144	33.0209	136
33.0434	137	33.0434	155	33.0434	145	33.0434	154
33.0659	163	33.0659	160	33.0659	154	33.0659	137
33.0884	144	33.0884	174	33.0884	127	33.0884	137
33.1109	166	33.1109	159	33.1109	114	33.1109	154
33.1334	160	33.1334	186	33.1334	128	33.1334	135
33.1559	151	33.1559	139	33.1559	147	33.1559	135
33.1784	159	33.1784	162	33.1784	109	33.1784	136
33.2009	143	33.2009	178	33.2009	121	33.2009	133
33.2235	129	33.2235	150	33.2235	107	33.2235	124
33.246	164	33.246	147	33.246	151	33.246	157
33.2685	156	33.2685	164	33.2685	152	33.2685	147
33.291	143	33.291	175	33.291	145	33.291	143
33.3135	126	33.3135	163	33.3135	132	33.3135	114
33.336	165	33.336	170	33.336	128	33.336	129
33.3585	135	33.3585	190	33.3585	162	33.3585	139
33.381	142	33.381	139	33.381	157	33.381	143
33.4035	143	33.4035	156	33.4035	165	33.4035	136
33.426	153	33.426	164	33.426	152	33.426	144
33.4485	124	33.4485	165	33.4485	142	33.4485	156
33.471	150	33.471	173	33.471	150	33.471	163
33.4935	135	33.4935	163	33.4935	165	33.4935	155
33.516	165	33.516	163	33.516	174	33.516	157
33.5385	146	33.5385	167	33.5385	162	33.5385	178
33.561	144	33.561	191	33.561	164	33.561	164
33.5835	161	33.5835	184	33.5835	169	33.5835	160
33.606	167	33.606	162	33.606	187	33.606	185
33.6285	159	33.6285	170	33.6285	168	33.6285	176
33.651	164	33.651	178	33.651	193	33.651	178
33.6735	134	33.6735	186	33.6735	170	33.6735	176
33.696	164	33.696	171	33.696	184	33.696	162
33.7185	156	33.7185	156	33.7185	203	33.7185	194
33.741	148	33.741	160	33.741	204	33.741	173
33.7635	141	33.7635	173	33.7635	171	33.7635	175
33.786	170	33.786	186	33.786	188	33.786	209
33.8085	165	33.8085	183	33.8085	165	33.8085	193
33.831	148	33.831	175	33.831	179	33.831	190
33.8535	126	33.8535	204	33.8535	217	33.8535	186
33.876	159	33.876	169	33.876	202	33.876	187
33.8985	139	33.8985	178	33.8985	172	33.8985	204
33.9211	146	33.9211	170	33.9211	196	33.9211	197
33.9436	140	33.9436	153	33.9436	209	33.9436	198
33.9661	140	33.9661	152	33.9661	158	33.9661	186
33.9886	139	33.9886	181	33.9886	185	33.9886	170
34.0111	144	34.0111	153	34.0111	191	34.0111	154
34.0336	117	34.0336	181	34.0336	185	34.0336	169
34.0561	132	34.0561	190	34.0561	193	34.0561	186
34.0786	153	34.0786	172	34.0786	193	34.0786	141
34.1011	154	34.1011	182	34.1011	188	34.1011	157
34.1236	144	34.1236	157	34.1236	187	34.1236	157
34.1461	130	34.1461	175	34.1461	192	34.1461	190
34.1686	151	34.1686	177	34.1686	187	34.1686	178
34.1911	169	34.1911	161	34.1911	185	34.1911	176
34.2136	149	34.2136	170	34.2136	180	34.2136	152
34.2361	142	34.2361	190	34.2361	161	34.2361	169
34.2586	138	34.2586	160	34.2586	181	34.2586	168
34.2811	164	34.2811	178	34.2811	170	34.2811	152
34.3036	143	34.3036	189	34.3036	187	34.3036	171
34.3261	139	34.3261	186	34.3261	184	34.3261	177
34.3486	146	34.3486	160	34.3486	188	34.3486	176
34.3711	153	34.3711	165	34.3711	205	34.3711	202
34.3936	145	34.3936	170	34.3936	162	34.3936	178
34.4161	139	34.4161	191	34.4161	199	34.4161	173
34.4386	144	34.4386	166	34.4386	194	34.4386	171
34.4611	133	34.4611	162	34.4611	183	34.4611	164
34.4836	156	34.4836	152	34.4836	197	34.4836	166
34.5061	132	34.5061	182	34.5061	187	34.5061	169
34.5286	162	34.5286	186	34.5286	203	34.5286	161
34.5511	151	34.5511	161	34.5511	151	34.5511	165
34.5736	148	34.5736	167	34.5736	177	34.5736	182
34.5961	142	34.5961	170	34.5961	191	34.5961	169
34.6187	139	34.6187	162	34.6187	188	34.6187	193
34.6412	121	34.6412	166	34.6412	173	34.6412	175
34.6637	166	34.6637	168	34.6637	202	34.6637	180
34.6862	118	34.6862	184	34.6862	197	34.6862	181
34.7087	132	34.7087	170	34.7087	206	34.7087	177
34.7312	157	34.7312	181	34.7312	203	34.7312	180
34.7537	131	34.7537	170	34.7537	194	34.7537	201
34.7762	156	34.7762	166	34.7762	180	34.7762	198
34.7987	136	34.7987	181	34.7987	182	34.7987	188
34.8212	131	34.8212	182	34.8212	198	34.8212	192
34.8437	152	34.8437	167	34.8437	188	34.8437	174
34.8662	160	34.8662	170	34.8662	186	34.8662	178
34.8887	138	34.8887	172	34.8887	189	34.8887	201
34.9112	162	34.9112	176	34.9112	193	34.9112	165
34.9337	131	34.9337	165	34.9337	190	34.9337	215
34.9562	134	34.9562	154	34.9562	187	34.9562	181
34.9787	147	34.9787	159	34.9787	165	34.9787	212
35.0012	126	35.0012	159	35.0012	199	35.0012	174
35.0237	138	35.0237	159	35.0237	235	35.0237	177
35.0462	152	35.0462	162	35.0462	201	35.0462	175
35.0687	134	35.0687	171	35.0687	208	35.0687	187
35.0912	140	35.0912	181	35.0912	196	35.0912	220
35.1137	144	35.1137	194	35.1137	198	35.1137	198
35.1362	159	35.1362	164	35.1362	208	35.1362	181
35.1587	124	35.1587	163	35.1587	226	35.1587	213
35.1812	142	35.1812	167	35.1812	251	35.1812	240
35.2037	152	35.2037	156	35.2037	245	35.2037	203
35.2262	120	35.2262	185	35.2262	208	35.2262	229
35.2487	119	35.2487	194	35.2487	242	35.2487	227
35.2712	122	35.2712	192	35.2712	245	35.2712	244
35.2937	139	35.2937	191	35.2937	247	35.2937	273
35.3163	123	35.3163	178	35.3163	249	35.3163	277
35.3388	130	35.3388	199	35.3388	268	35.3388	262
35.3613	131	35.3613	194	35.3613	257	35.3613	244
35.3838	121	35.3838	210	35.3838	263	35.3838	249
35.4063	123	35.4063	175	35.4063	283	35.4063	288
35.4288	133	35.4288	184	35.4288	298	35.4288	315
35.4513	145	35.4513	183	35.4513	312	35.4513	288
35.4738	146	35.4738	227	35.4738	254	35.4738	315
35.4963	145	35.4963	251	35.4963	335	35.4963	342
35.5188	132	35.5188	185	35.5188	370	35.5188	348
35.5413	117	35.5413	222	35.5413	370	35.5413	413
35.5638	133	35.5638	245	35.5638	344	35.5638	426
35.5863	147	35.5863	235	35.5863	391	35.5863	460
35.6088	138	35.6088	277	35.6088	419	35.6088	449
35.6313	141	35.6313	259	35.6313	393	35.6313	435
35.6538	141	35.6538	273	35.6538	411	35.6538	504
35.6763	132	35.6763	305	35.6763	498	35.6763	502
35.6988	138	35.6988	285	35.6988	419	35.6988	471
35.7213	125	35.7213	290	35.7213	385	35.7213	474
35.7438	122	35.7438	290	35.7438	422	35.7438	477
35.7663	119	35.7663	276	35.7663	383	35.7663	465
35.7888	142	35.7888	294	35.7888	397	35.7888	442
35.8113	124	35.8113	261	35.8113	387	35.8113	438
35.8338	132	35.8338	281	35.8338	347	35.8338	400
35.8563	130	35.8563	232	35.8563	349	35.8563	367
35.8788	144	35.8788	218	35.8788	361	35.8788	363
35.9013	137	35.9013	227	35.9013	299	35.9013	347
35.9238	141	35.9238	181	35.9238	303	35.9238	340
35.9463	138	35.9463	178	35.9463	297	35.9463	339
35.9688	156	35.9688	208	35.9688	291	35.9688	285
35.9914	122	35.9914	190	35.9914	273	35.9914	304
36.0139	115	36.0139	182	36.0139	265	36.0139	260
36.0364	131	36.0364	181	36.0364	246	36.0364	279
36.0589	134	36.0589	171	36.0589	270	36.0589	234
36.0814	123	36.0814	168	36.0814	246	36.0814	262
36.1039	118	36.1039	190	36.1039	254	36.1039	213
36.1264	144	36.1264	173	36.1264	238	36.1264	213
36.1489	152	36.1489	185	36.1489	237	36.1489	210
36.1714	131	36.1714	167	36.1714	232	36.1714	211
36.1939	127	36.1939	169	36.1939	249	36.1939	198
36.2164	130	36.2164	159	36.2164	198	36.2164	222
36.2389	136	36.2389	160	36.2389	194	36.2389	208
36.2614	135	36.2614	147	36.2614	215	36.2614	208
36.2839	119	36.2839	169	36.2839	183	36.2839	176
36.3064	129	36.3064	149	36.3064	181	36.3064	198
36.3289	144	36.3289	162	36.3289	207	36.3289	189
36.3514	115	36.3514	165	36.3514	191	36.3514	176
36.3739	134	36.3739	162	36.3739	168	36.3739	188
36.3964	134	36.3964	172	36.3964	199	36.3964	189
36.4189	130	36.4189	167	36.4189	174	36.4189	169
36.4414	134	36.4414	145	36.4414	170	36.4414	164
36.4639	147	36.4639	146	36.4639	175	36.4639	175
36.4864	132	36.4864	151	36.4864	186	36.4864	163
36.5089	132	36.5089	151	36.5089	165	36.5089	177
36.5314	131	36.5314	145	36.5314	182	36.5314	173
36.5539	124	36.5539	155	36.5539	194	36.5539	177
36.5764	122	36.5764	172	36.5764	151	36.5764	178
36.5989	126	36.5989	193	36.5989	168	36.5989	152
36.6214	123	36.6214	141	36.6214	151	36.6214	160
36.6439	120	36.6439	174	36.6439	147	36.6439	176
36.6664	113	36.6664	161	36.6664	152	36.6664	168
36.689	131	36.689	162	36.689	171	36.689	142
36.7115	128	36.7115	153	36.7115	155	36.7115	166
36.734	119	36.734	175	36.734	141	36.734	144
36.7565	121	36.7565	121	36.7565	176	36.7565	171
36.779	138	36.779	159	36.779	142	36.779	164
36.8015	130	36.8015	139	36.8015	179	36.8015	137
36.824	119	36.824	138	36.824	159	36.824	150
36.8465	124	36.8465	148	36.8465	164	36.8465	167
36.869	128	36.869	159	36.869	153	36.869	131
36.8915	142	36.8915	135	36.8915	171	36.8915	147
36.914	102	36.914	145	36.914	165	36.914	151
36.9365	118	36.9365	129	36.9365	150	36.9365	126
36.959	122	36.959	136	36.959	150	36.959	123
36.9815	116	36.9815	152	36.9815	153	36.9815	154
37.004	131	37.004	131	37.004	140	37.004	159
37.0265	125	37.0265	155	37.0265	142	37.0265	163
37.049	131	37.049	146	37.049	191	37.049	142
37.0715	123	37.0715	143	37.0715	156	37.0715	157
37.094	111	37.094	140	37.094	156	37.094	155
37.1165	104	37.1165	137	37.1165	148	37.1165	126
37.139	126	37.139	147	37.139	154	37.139	122
37.1615	117	37.1615	143	37.1615	141	37.1615	143
37.184	104	37.184	145	37.184	145	37.184	133
37.2065	131	37.2065	155	37.2065	149	37.2065	151
37.229	116	37.229	148	37.229	129	37.229	133
37.2515	126	37.2515	132	37.2515	115	37.2515	136
37.274	113	37.274	153	37.274	106	37.274	149
37.2965	115	37.2965	140	37.2965	146	37.2965	141
37.319	124	37.319	159	37.319	139	37.319	150
37.3415	127	37.3415	123	37.3415	133	37.3415	136
37.364	140	37.364	133	37.364	142	37.364	147
37.3866	118	37.3866	120	37.3866	138	37.3866	118
37.4091	134	37.4091	137	37.4091	140	37.4091	138
37.4316	121	37.4316	127	37.4316	147	37.4316	139
37.4541	116	37.4541	134	37.4541	128	37.4541	147
37.4766	106	37.4766	130	37.4766	136	37.4766	131
37.4991	107	37.4991	129	37.4991	129	37.4991	135
37.5216	125	37.5216	123	37.5216	134	37.5216	165
37.5441	136	37.5441	128	37.5441	137	37.5441	133
37.5666	114	37.5666	112	37.5666	160	37.5666	111
37.5891	118	37.5891	115	37.5891	140	37.5891	148
37.6116	117	37.6116	144	37.6116	129	37.6116	122
37.6341	130	37.6341	126	37.6341	131	37.6341	127
37.6566	95	37.6566	134	37.6566	127	37.6566	136
37.6791	110	37.6791	149	37.6791	149	37.6791	128
37.7016	111	37.7016	147	37.7016	130	37.7016	127
37.7241	114	37.7241	138	37.7241	112	37.7241	130
37.7466	115	37.7466	129	37.7466	161	37.7466	132
37.7691	121	37.7691	141	37.7691	134	37.7691	139
37.7916	117	37.7916	122	37.7916	114	37.7916	159
37.8141	117	37.8141	134	37.8141	136	37.8141	119
37.8366	112	37.8366	134	37.8366	139	37.8366	129
37.8591	111	37.8591	139	37.8591	139	37.8591	126
37.8816	118	37.8816	129	37.8816	131	37.8816	140
37.9041	131	37.9041	139	37.9041	144	37.9041	112
37.9266	132	37.9266	129	37.9266	141	37.9266	121
37.9491	131	37.9491	137	37.9491	134	37.9491	97
37.9716	138	37.9716	127	37.9716	130	37.9716	114
37.9941	119	37.9941	112	37.9941	122	37.9941	134
38.0166	128	38.0166	153	38.0166	126	38.0166	150
38.0391	109	38.0391	146	38.0391	149	38.0391	129
38.0616	119	38.0616	128	38.0616	134	38.0616	123
38.0842	136	38.0842	132	38.0842	135	38.0842	126
38.1067	109	38.1067	125	38.1067	115	38.1067	143
38.1292	120	38.1292	135	38.1292	104	38.1292	113
38.1517	110	38.1517	143	38.1517	111	38.1517	128
38.1742	131	38.1742	126	38.1742	123	38.1742	134
38.1967	89	38.1967	127	38.1967	126	38.1967	128
38.2192	111	38.2192	122	38.2192	115	38.2192	134
38.2417	121	38.2417	124	38.2417	120	38.2417	114
38.2642	108	38.2642	139	38.2642	123	38.2642	141
38.2867	115	38.2867	119	38.2867	120	38.2867	121
38.3092	116	38.3092	131	38.3092	135	38.3092	120
38.3317	133	38.3317	136	38.3317	104	38.3317	130
38.3542	106	38.3542	136	38.3542	111	38.3542	122
38.3767	114	38.3767	127	38.3767	133	38.3767	124
38.3992	107	38.3992	132	38.3992	139	38.3992	121
38.4217	107	38.4217	104	38.4217	142	38.4217	112
38.4442	111	38.4442	109	38.4442	116	38.4442	136
38.4667	135	38.4667	126	38.4667	128	38.4667	130
38.4892	111	38.4892	110	38.4892	126	38.4892	100
38.5117	113	38.5117	113	38.5117	131	38.5117	121
38.5342	104	38.5342	113	38.5342	94	38.5342	113
38.5567	105	38.5567	131	38.5567	120	38.5567	128
38.5792	98	38.5792	125	38.5792	112	38.5792	110
38.6017	122	38.6017	119	38.6017	130	38.6017	129
38.6242	126	38.6242	117	38.6242	120	38.6242	124
38.6467	114	38.6467	126	38.6467	131	38.6467	115
38.6692	100	38.6692	125	38.6692	112	38.6692	115
38.6917	104	38.6917	115	38.6917	97	38.6917	101
38.7142	131	38.7142	121	38.7142	132	38.7142	117
38.7367	95	38.7367	134	38.7367	130	38.7367	138
38.7592	113	38.7592	98	38.7592	112	38.7592	111
38.7818	133	38.7818	120	38.7818	135	38.7818	117
38.8043	108	38.8043	117	38.8043	110	38.8043	129
38.8268	122	38.8268	152	38.8268	114	38.8268	105
38.8493	119	38.8493	126	38.8493	117	38.8493	133
38.8718	104	38.8718	119	38.8718	103	38.8718	102
38.8943	131	38.8943	114	38.8943	111	38.8943	104
38.9168	103	38.9168	106	38.9168	127	38.9168	117
38.9393	100	38.9393	110	38.9393	118	38.9393	119
38.9618	108	38.9618	142	38.9618	123	38.9618	116
38.9843	117	38.9843	107	38.9843	119	38.9843	102
39.0068	120	39.0068	136	39.0068	133	39.0068	126
39.0293	113	39.0293	117	39.0293	115	39.0293	108
39.0518	102	39.0518	127	39.0518	119	39.0518	117
39.0743	113	39.0743	124	39.0743	125	39.0743	132
39.0968	115	39.0968	129	39.0968	105	39.0968	105
39.1193	120	39.1193	124	39.1193	98	39.1193	116
39.1418	118	39.1418	119	39.1418	91	39.1418	98
39.1643	98	39.1643	106	39.1643	96	39.1643	109
39.1868	121	39.1868	117	39.1868	124	39.1868	110
39.2093	121	39.2093	127	39.2093	107	39.2093	111
39.2318	102	39.2318	96	39.2318	93	39.2318	123
39.2543	97	39.2543	114	39.2543	117	39.2543	121
39.2768	105	39.2768	112	39.2768	110	39.2768	99
39.2993	106	39.2993	106	39.2993	112	39.2993	124
39.3218	115	39.3218	108	39.3218	104	39.3218	109
39.3443	113	39.3443	106	39.3443	113	39.3443	85
39.3668	120	39.3668	110	39.3668	95	39.3668	94
39.3893	115	39.3893	105	39.3893	116	39.3893	116
39.4118	100	39.4118	115	39.4118	106	39.4118	96
39.4343	90	39.4343	94	39.4343	96	39.4343	87
39.4569	112	39.4569	101	39.4569	89	39.4569	119
39.4794	109	39.4794	132	39.4794	106	39.4794	111
39.5019	107	39.5019	117	39.5019	112	39.5019	104
39.5244	115	39.5244	121	39.5244	84	39.5244	105
39.5469	103	39.5469	113	39.5469	113	39.5469	96
39.5694	93	39.5694	120	39.5694	93	39.5694	102
39.5919	115	39.5919	128	39.5919	99	39.5919	106
39.6144	80	39.6144	122	39.6144	110	39.6144	101
39.6369	105	39.6369	109	39.6369	104	39.6369	126
39.6594	120	39.6594	109	39.6594	103	39.6594	103
39.6819	133	39.6819	113	39.6819	115	39.6819	94
39.7044	99	39.7044	115	39.7044	131	39.7044	102
39.7269	113	39.7269	105	39.7269	118	39.7269	111
39.7494	94	39.7494	101	39.7494	78	39.7494	106
39.7719	94	39.7719	105	39.7719	115	39.7719	100
39.7944	109	39.7944	110	39.7944	109	39.7944	115
39.8169	104	39.8169	111	39.8169	112	39.8169	108
39.8394	109	39.8394	120	39.8394	97	39.8394	112
39.8619	94	39.8619	124	39.8619	96	39.8619	122
39.8844	120	39.8844	115	39.8844	106	39.8844	103
39.9069	132	39.9069	100	39.9069	95	39.9069	93
39.9294	91	39.9294	98	39.9294	106	39.9294	107
39.9519	108	39.9519	101	39.9519	106	39.9519	104
39.9744	114	39.9744	115	39.9744	92	39.9744	89
39.9969	113	39.9969	92	39.9969	95	39.9969	111
40.0194	103	40.0194	106	40.0194	106	40.0194	122
40.0419	111	40.0419	105	40.0419	105	40.0419	107
40.0644	100	40.0644	99	40.0644	112	40.0644	104
40.0869	123	40.0869	98	40.0869	97	40.0869	104
40.1094	108	40.1094	112	40.1094	93	40.1094	98
40.1319	100	40.1319	113	40.1319	107	40.1319	90
40.1545	109	40.1545	108	40.1545	100	40.1545	110
40.177	99	40.177	120	40.177	122	40.177	96
40.1995	106	40.1995	113	40.1995	110	40.1995	105
40.222	107	40.222	112	40.222	103	40.222	99
40.2445	116	40.2445	109	40.2445	107	40.2445	121
40.267	84	40.267	120	40.267	94	40.267	110
40.2895	103	40.2895	112	40.2895	92	40.2895	98
40.312	112	40.312	106	40.312	117	40.312	105
40.3345	103	40.3345	110	40.3345	87	40.3345	102
40.357	120	40.357	116	40.357	96	40.357	102
40.3795	95	40.3795	96	40.3795	117	40.3795	103
40.402	100	40.402	107	40.402	123	40.402	98
40.4245	110	40.4245	106	40.4245	107	40.4245	98
40.447	82	40.447	131	40.447	109	40.447	116
40.4695	103	40.4695	109	40.4695	82	40.4695	106
40.492	93	40.492	127	40.492	96	40.492	101
40.5145	96	40.5145	119	40.5145	79	40.5145	104
40.537	103	40.537	119	40.537	90	40.537	100
40.5595	116	40.5595	118	40.5595	111	40.5595	98
40.582	117	40.582	101	40.582	84	40.582	97
40.6045	132	40.6045	108	40.6045	102	40.6045	100
40.627	103	40.627	128	40.627	103	40.627	101
40.6495	114	40.6495	114	40.6495	81	40.6495	96
40.672	97	40.672	98	40.672	112	40.672	111
40.6945	86	40.6945	110	40.6945	111	40.6945	113
40.717	102	40.717	115	40.717	112	40.717	117
40.7395	104	40.7395	106	40.7395	103	40.7395	100
40.762	94	40.762	92	40.762	95	40.762	86
40.7845	104	40.7845	111	40.7845	112	40.7845	95
40.807	98	40.807	119	40.807	109	40.807	95
40.8295	107	40.8295	109	40.8295	115	40.8295	103
40.8521	93	40.8521	112	40.8521	105	40.8521	94
40.8746	118	40.8746	119	40.8746	121	40.8746	103
40.8971	116	40.8971	126	40.8971	110	40.8971	114
40.9196	113	40.9196	110	40.9196	116	40.9196	90
40.9421	98	40.9421	108	40.9421	104	40.9421	103
40.9646	102	40.9646	108	40.9646	101	40.9646	127
40.9871	106	40.9871	108	40.9871	131	40.9871	114
41.0096	108	41.0096	116	41.0096	115	41.0096	122
41.0321	115	41.0321	95	41.0321	95	41.0321	118
41.0546	105	41.0546	120	41.0546	103	41.0546	94
41.0771	103	41.0771	111	41.0771	103	41.0771	98
41.0996	111	41.0996	102	41.0996	94	41.0996	108
41.1221	113	41.1221	116	41.1221	97	41.1221	124
41.1446	116	41.1446	114	41.1446	82	41.1446	121
41.1671	100	41.1671	135	41.1671	103	41.1671	123
41.1896	109	41.1896	106	41.1896	110	41.1896	92
41.2121	96	41.2121	104	41.2121	97	41.2121	115
41.2346	96	41.2346	119	41.2346	92	41.2346	111
41.2571	123	41.2571	101	41.2571	93	41.2571	127
41.2796	97	41.2796	102	41.2796	133	41.2796	108
41.3021	101	41.3021	90	41.3021	103	41.3021	117
41.3246	103	41.3246	98	41.3246	101	41.3246	125
41.3471	121	41.3471	122	41.3471	113	41.3471	119
41.3696	108	41.3696	112	41.3696	94	41.3696	124
41.3921	93	41.3921	118	41.3921	111	41.3921	112
41.4146	122	41.4146	126	41.4146	95	41.4146	116
41.4371	117	41.4371	139	41.4371	108	41.4371	124
41.4596	103	41.4596	122	41.4596	106	41.4596	126
41.4821	97	41.4821	105	41.4821	99	41.4821	119
41.5046	115	41.5046	104	41.5046	104	41.5046	123
41.5271	106	41.5271	108	41.5271	100	41.5271	106
41.5497	109	41.5497	136	41.5497	110	41.5497	113
41.5722	113	41.5722	110	41.5722	108	41.5722	132
41.5947	98	41.5947	112	41.5947	111	41.5947	107
41.6172	96	41.6172	103	41.6172	113	41.6172	137
41.6397	96	41.6397	119	41.6397	109	41.6397	114
41.6622	100	41.6622	120	41.6622	101	41.6622	102
41.6847	114	41.6847	99	41.6847	107	41.6847	104
41.7072	97	41.7072	111	41.7072	105	41.7072	110
41.7297	102	41.7297	117	41.7297	112	41.7297	96
41.7522	118	41.7522	119	41.7522	110	41.7522	112
41.7747	111	41.7747	118	41.7747	95	41.7747	107
41.7972	110	41.7972	104	41.7972	105	41.7972	104
41.8197	91	41.8197	102	41.8197	96	41.8197	86
41.8422	106	41.8422	96	41.8422	106	41.8422	96
41.8647	99	41.8647	100	41.8647	95	41.8647	114
41.8872	101	41.8872	123	41.8872	97	41.8872	88
41.9097	118	41.9097	101	41.9097	99	41.9097	100
41.9322	105	41.9322	105	41.9322	125	41.9322	89
41.9547	116	41.9547	113	41.9547	80	41.9547	95
41.9772	108	41.9772	109	41.9772	81	41.9772	96
41.9997	93	41.9997	97	41.9997	84	41.9997	103
42.0222	102	42.0222	118	42.0222	102	42.0222	81
42.0447	99	42.0447	119	42.0447	107	42.0447	111
42.0672	118	42.0672	108	42.0672	107	42.0672	104
42.0897	100	42.0897	104	42.0897	87	42.0897	97
42.1122	103	42.1122	105	42.1122	111	42.1122	84
42.1347	108	42.1347	116	42.1347	100	42.1347	89
42.1572	99	42.1572	116	42.1572	102	42.1572	92
42.1797	108	42.1797	119	42.1797	110	42.1797	95
42.2022	116	42.2022	111	42.2022	87	42.2022	84
42.2247	105	42.2247	99	42.2247	101	42.2247	97
42.2473	112	42.2473	126	42.2473	86	42.2473	111
42.2698	112	42.2698	104	42.2698	97	42.2698	81
42.2923	100	42.2923	128	42.2923	102	42.2923	102
42.3148	104	42.3148	114	42.3148	93	42.3148	87
42.3373	105	42.3373	91	42.3373	89	42.3373	96
42.3598	121	42.3598	94	42.3598	97	42.3598	91
42.3823	111	42.3823	130	42.3823	92	42.3823	82
42.4048	86	42.4048	103	42.4048	98	42.4048	76
42.4273	108	42.4273	104	42.4273	79	42.4273	85
42.4498	123	42.4498	99	42.4498	75	42.4498	92
42.4723	99	42.4723	116	42.4723	99	42.4723	99
42.4948	101	42.4948	95	42.4948	85	42.4948	94
42.5173	99	42.5173	96	42.5173	88	42.5173	103
42.5398	117	42.5398	104	42.5398	90	42.5398	110
42.5623	117	42.5623	93	42.5623	81	42.5623	109
42.5848	105	42.5848	100	42.5848	88	42.5848	85
42.6073	111	42.6073	126	42.6073	84	42.6073	99
42.6298	121	42.6298	105	42.6298	92	42.6298	82
42.6523	100	42.6523	107	42.6523	107	42.6523	105
42.6748	99	42.6748	106	42.6748	98	42.6748	94
42.6973	94	42.6973	105	42.6973	94	42.6973	95
42.7198	99	42.7198	114	42.7198	105	42.7198	91
42.7423	121	42.7423	116	42.7423	81	42.7423	86
42.7648	125	42.7648	121	42.7648	72	42.7648	93
42.7873	117	42.7873	87	42.7873	87	42.7873	87
42.8098	114	42.8098	98	42.8098	81	42.8098	92
42.8323	111	42.8323	104	42.8323	105	42.8323	79
42.8548	113	42.8548	133	42.8548	87	42.8548	78
42.8773	107	42.8773	98	42.8773	106	42.8773	78
42.8998	121	42.8998	124	42.8998	79	42.8998	95
42.9224	115	42.9224	102	42.9224	94	42.9224	92
42.9449	107	42.9449	98	42.9449	80	42.9449	88
42.9674	111	42.9674	106	42.9674	68	42.9674	114
42.9899	109	42.9899	116	42.9899	101	42.9899	101
43.0124	120	43.0124	92	43.0124	72	43.0124	92
43.0349	106	43.0349	101	43.0349	81	43.0349	91
43.0574	102	43.0574	102	43.0574	76	43.0574	97
43.0799	103	43.0799	119	43.0799	76	43.0799	82
43.1024	110	43.1024	108	43.1024	89	43.1024	92
43.1249	115	43.1249	115	43.1249	88	43.1249	81
43.1474	128	43.1474	108	43.1474	94	43.1474	89
43.1699	104	43.1699	109	43.1699	92	43.1699	88
43.1924	112	43.1924	110	43.1924	91	43.1924	81
43.2149	108	43.2149	105	43.2149	110	43.2149	77
43.2374	130	43.2374	101	43.2374	84	43.2374	85
43.2599	120	43.2599	120	43.2599	73	43.2599	98
43.2824	131	43.2824	106	43.2824	109	43.2824	96
43.3049	109	43.3049	102	43.3049	69	43.3049	80
43.3274	123	43.3274	136	43.3274	113	43.3274	77
43.3499	141	43.3499	88	43.3499	84	43.3499	88
43.3724	114	43.3724	108	43.3724	74	43.3724	80
43.3949	109	43.3949	113	43.3949	80	43.3949	87
43.4174	125	43.4174	114	43.4174	85	43.4174	99
43.4399	117	43.4399	117	43.4399	83	43.4399	89
43.4624	109	43.4624	109	43.4624	92	43.4624	82
43.4849	107	43.4849	87	43.4849	80	43.4849	75
43.5074	115	43.5074	96	43.5074	84	43.5074	93
43.5299	117	43.5299	98	43.5299	84	43.5299	68
43.5524	120	43.5524	96	43.5524	80	43.5524	91
43.5749	117	43.5749	99	43.5749	97	43.5749	92
43.5974	130	43.5974	111	43.5974	111	43.5974	81
43.62	117	43.62	114	43.62	84	43.62	76
43.6425	104	43.6425	102	43.6425	86	43.6425	85
43.665	98	43.665	101	43.665	87	43.665	86
43.6875	112	43.6875	115	43.6875	80	43.6875	85
43.71	119	43.71	108	43.71	67	43.71	83
43.7325	107	43.7325	98	43.7325	97	43.7325	84
43.755	127	43.755	101	43.755	97	43.755	82
43.7775	114	43.7775	102	43.7775	83	43.7775	85
43.8	121	43.8	101	43.8	81	43.8	98
43.8225	125	43.8225	132	43.8225	69	43.8225	74
43.845	103	43.845	129	43.845	71	43.845	94
43.8675	107	43.8675	108	43.8675	75	43.8675	102
43.89	114	43.89	97	43.89	81	43.89	78
43.9125	117	43.9125	103	43.9125	84	43.9125	82
43.935	104	43.935	106	43.935	69	43.935	101
43.9575	100	43.9575	103	43.9575	84	43.9575	77
43.98	117	43.98	115	43.98	89	43.98	79
44.0025	105	44.0025	104	44.0025	76	44.0025	84
44.025	120	44.025	113	44.025	81	44.025	88
44.0475	129	44.0475	99	44.0475	93	44.0475	89
44.07	112	44.07	112	44.07	85	44.07	93
44.0925	114	44.0925	88	44.0925	81	44.0925	77
44.115	105	44.115	102	44.115	78	44.115	74
44.1375	114	44.1375	99	44.1375	79	44.1375	73
44.16	112	44.16	115	44.16	84	44.16	78
44.1825	108	44.1825	123	44.1825	84	44.1825	61
44.205	82	44.205	118	44.205	81	44.205	85
44.2275	103	44.2275	102	44.2275	86	44.2275	91
44.25	107	44.25	98	44.25	98	44.25	77
44.2725	130	44.2725	118	44.2725	67	44.2725	89
44.295	124	44.295	96	44.295	74	44.295	80
44.3176	99	44.3176	106	44.3176	88	44.3176	74
44.3401	107	44.3401	95	44.3401	87	44.3401	100
44.3626	107	44.3626	112	44.3626	82	44.3626	78
44.3851	124	44.3851	93	44.3851	90	44.3851	61
44.4076	93	44.4076	107	44.4076	84	44.4076	73
44.4301	113	44.4301	103	44.4301	88	44.4301	78
44.4526	116	44.4526	104	44.4526	80	44.4526	82
44.4751	118	44.4751	106	44.4751	84	44.4751	96
44.4976	117	44.4976	103	44.4976	87	44.4976	83
44.5201	110	44.5201	95	44.5201	87	44.5201	83
44.5426	120	44.5426	82	44.5426	87	44.5426	77
44.5651	99	44.5651	101	44.5651	84	44.5651	85
44.5876	110	44.5876	103	44.5876	76	44.5876	78
44.6101	101	44.6101	77	44.6101	86	44.6101	100
44.6326	106	44.6326	93	44.6326	75	44.6326	86
44.6551	103	44.6551	101	44.6551	85	44.6551	95
44.6776	115	44.6776	101	44.6776	91	44.6776	62
44.7001	111	44.7001	117	44.7001	88	44.7001	81
44.7226	103	44.7226	93	44.7226	66	44.7226	68
44.7451	119	44.7451	108	44.7451	83	44.7451	85
44.7676	101	44.7676	113	44.7676	81	44.7676	111
44.7901	131	44.7901	106	44.7901	74	44.7901	88
44.8126	113	44.8126	121	44.8126	79	44.8126	83
44.8351	108	44.8351	95	44.8351	83	44.8351	99
44.8576	99	44.8576	99	44.8576	94	44.8576	86
44.8801	112	44.8801	119	44.8801	90	44.8801	87
44.9026	98	44.9026	88	44.9026	80	44.9026	86
44.9251	125	44.9251	109	44.9251	70	44.9251	73
44.9476	127	44.9476	88	44.9476	77	44.9476	77
44.9701	107	44.9701	107	44.9701	92	44.9701	73
44.9926	117	44.9926	99	44.9926	85	44.9926	90
45.0152	126	45.0152	111	45.0152	74	45.0152	82
45.0377	109	45.0377	112	45.0377	84	45.0377	87
45.0602	111	45.0602	100	45.0602	76	45.0602	94
45.0827	126	45.0827	106	45.0827	105	45.0827	90
45.1052	108	45.1052	100	45.1052	81	45.1052	80
45.1277	105	45.1277	90	45.1277	96	45.1277	88
45.1502	129	45.1502	106	45.1502	103	45.1502	86
45.1727	113	45.1727	99	45.1727	73	45.1727	94
45.1952	113	45.1952	104	45.1952	67	45.1952	83
45.2177	124	45.2177	111	45.2177	80	45.2177	85
45.2402	138	45.2402	111	45.2402	80	45.2402	93
45.2627	123	45.2627	89	45.2627	76	45.2627	62
45.2852	122	45.2852	107	45.2852	79	45.2852	84
45.3077	110	45.3077	93	45.3077	72	45.3077	81
45.3302	107	45.3302	104	45.3302	83	45.3302	83
45.3527	119	45.3527	110	45.3527	76	45.3527	74
45.3752	120	45.3752	80	45.3752	87	45.3752	82
45.3977	129	45.3977	102	45.3977	76	45.3977	97
45.4202	126	45.4202	93	45.4202	70	45.4202	86
45.4427	145	45.4427	110	45.4427	79	45.4427	99
45.4652	134	45.4652	96	45.4652	71	45.4652	76
45.4877	123	45.4877	101	45.4877	82	45.4877	94
45.5102	135	45.5102	98	45.5102	80	45.5102	82
45.5327	154	45.5327	105	45.5327	79	45.5327	77
45.5552	133	45.5552	103	45.5552	75	45.5552	92
45.5777	150	45.5777	100	45.5777	79	45.5777	82
45.6002	202	45.6002	95	45.6002	76	45.6002	85
45.6227	145	45.6227	97	45.6227	88	45.6227	85
45.6452	141	45.6452	100	45.6452	78	45.6452	91
45.6677	194	45.6677	112	45.6677	93	45.6677	88
45.6902	171	45.6902	103	45.6902	85	45.6902	67
45.7128	147	45.7128	84	45.7128	93	45.7128	63
45.7353	140	45.7353	97	45.7353	100	45.7353	99
45.7578	159	45.7578	106	45.7578	84	45.7578	83
45.7803	145	45.7803	94	45.7803	78	45.7803	91
45.8028	149	45.8028	101	45.8028	74	45.8028	95
45.8253	137	45.8253	99	45.8253	73	45.8253	92
45.8478	134	45.8478	90	45.8478	73	45.8478	75
45.8703	127	45.8703	105	45.8703	83	45.8703	92
45.8928	130	45.8928	112	45.8928	87	45.8928	87
45.9153	114	45.9153	106	45.9153	76	45.9153	71
45.9378	112	45.9378	106	45.9378	83	45.9378	84
45.9603	104	45.9603	104	45.9603	67	45.9603	91
45.9828	112	45.9828	105	45.9828	73	45.9828	83
46.0053	121	46.0053	94	46.0053	75	46.0053	78
46.0278	94	46.0278	91	46.0278	89	46.0278	89
46.0503	97	46.0503	92	46.0503	84	46.0503	91
46.0728	109	46.0728	86	46.0728	88	46.0728	76
46.0953	124	46.0953	108	46.0953	81	46.0953	90
46.1178	109	46.1178	104	46.1178	66	46.1178	85
46.1403	116	46.1403	109	46.1403	83	46.1403	90
46.1628	97	46.1628	94	46.1628	72	46.1628	82
46.1853	101	46.1853	105	46.1853	88	46.1853	65
46.2078	112	46.2078	98	46.2078	76	46.2078	69
46.2303	109	46.2303	106	46.2303	74	46.2303	81
46.2528	109	46.2528	111	46.2528	82	46.2528	100
46.2753	93	46.2753	100	46.2753	76	46.2753	84
46.2978	113	46.2978	120	46.2978	80	46.2978	84
46.3203	92	46.3203	101	46.3203	68	46.3203	87
46.3428	98	46.3428	108	46.3428	90	46.3428	85
46.3653	96	46.3653	87	46.3653	77	46.3653	72
46.3879	97	46.3879	96	46.3879	66	46.3879	87
46.4104	113	46.4104	93	46.4104	79	46.4104	88
46.4329	97	46.4329	92	46.4329	80	46.4329	70
46.4554	112	46.4554	98	46.4554	71	46.4554	74
46.4779	107	46.4779	92	46.4779	80	46.4779	88
46.5004	94	46.5004	99	46.5004	66	46.5004	81
46.5229	98	46.5229	93	46.5229	81	46.5229	76
46.5454	107	46.5454	84	46.5454	88	46.5454	70
46.5679	102	46.5679	105	46.5679	89	46.5679	92
46.5904	122	46.5904	90	46.5904	75	46.5904	68
46.6129	109	46.6129	100	46.6129	87	46.6129	68
46.6354	104	46.6354	76	46.6354	77	46.6354	66
46.6579	110	46.6579	91	46.6579	76	46.6579	72
46.6804	95	46.6804	94	46.6804	66	46.6804	94
46.7029	94	46.7029	93	46.7029	79	46.7029	80
46.7254	92	46.7254	81	46.7254	80	46.7254	88
46.7479	95	46.7479	105	46.7479	85	46.7479	83
46.7704	115	46.7704	88	46.7704	83	46.7704	84
46.7929	91	46.7929	90	46.7929	72	46.7929	75
46.8154	85	46.8154	86	46.8154	75	46.8154	76
46.8379	89	46.8379	83	46.8379	67	46.8379	77
46.8604	103	46.8604	100	46.8604	81	46.8604	75
46.8829	84	46.8829	82	46.8829	64	46.8829	68
46.9054	110	46.9054	93	46.9054	72	46.9054	74
46.9279	114	46.9279	94	46.9279	65	46.9279	84
46.9504	108	46.9504	82	46.9504	48	46.9504	94
46.9729	108	46.9729	97	46.9729	94	46.9729	100
46.9954	91	46.9954	119	46.9954	89	46.9954	76
47.0179	100	47.0179	75	47.0179	79	47.0179	85
47.0404	131	47.0404	97	47.0404	93	47.0404	65
47.0629	96	47.0629	82	47.0629	92	47.0629	74
47.0855	96	47.0855	85	47.0855	79	47.0855	86
47.108	98	47.108	99	47.108	76	47.108	85
47.1305	106	47.1305	94	47.1305	80	47.1305	84
47.153	103	47.153	96	47.153	93	47.153	81
47.1755	102	47.1755	81	47.1755	69	47.1755	79
47.198	104	47.198	103	47.198	63	47.198	88
47.2205	115	47.2205	103	47.2205	89	47.2205	87
47.243	96	47.243	88	47.243	77	47.243	90
47.2655	116	47.2655	100	47.2655	69	47.2655	61
47.288	102	47.288	92	47.288	70	47.288	76
47.3105	94	47.3105	108	47.3105	77	47.3105	88
47.333	102	47.333	96	47.333	70	47.333	82
47.3555	92	47.3555	108	47.3555	84	47.3555	86
47.378	102	47.378	87	47.378	74	47.378	72
47.4005	101	47.4005	97	47.4005	72	47.4005	86
47.423	105	47.423	89	47.423	73	47.423	82
47.4455	101	47.4455	115	47.4455	67	47.4455	95
47.468	103	47.468	105	47.468	80	47.468	91
47.4905	122	47.4905	108	47.4905	73	47.4905	88
47.513	126	47.513	95	47.513	77	47.513	79
47.5355	116	47.5355	88	47.5355	75	47.5355	74
47.558	113	47.558	81	47.558	78	47.558	78
47.5805	104	47.5805	92	47.5805	71	47.5805	66
47.603	118	47.603	108	47.603	76	47.603	72
47.6255	102	47.6255	91	47.6255	95	47.6255	67
47.648	89	47.648	89	47.648	67	47.648	78
47.6705	84	47.6705	122	47.6705	76	47.6705	73
47.693	91	47.693	92	47.693	74	47.693	99
47.7155	96	47.7155	85	47.7155	72	47.7155	68
47.738	88	47.738	95	47.738	73	47.738	80
47.7605	92	47.7605	104	47.7605	80	47.7605	63
47.7831	81	47.7831	95	47.7831	87	47.7831	81
47.8056	90	47.8056	92	47.8056	86	47.8056	93
47.8281	92	47.8281	65	47.8281	84	47.8281	82
47.8506	96	47.8506	110	47.8506	77	47.8506	69
47.8731	102	47.8731	98	47.8731	77	47.8731	77
47.8956	101	47.8956	94	47.8956	60	47.8956	74
47.9181	100	47.9181	86	47.9181	79	47.9181	88
47.9406	110	47.9406	81	47.9406	85	47.9406	71
47.9631	99	47.9631	93	47.9631	67	47.9631	85
47.9856	97	47.9856	93	47.9856	61	47.9856	73
48.0081	106	48.0081	110	48.0081	77	48.0081	89
48.0306	88	48.0306	93	48.0306	63	48.0306	68
48.0531	101	48.0531	120	48.0531	83	48.0531	89
48.0756	101	48.0756	97	48.0756	83	48.0756	78
48.0981	93	48.0981	100	48.0981	68	48.0981	80
48.1206	100	48.1206	95	48.1206	83	48.1206	83
48.1431	112	48.1431	96	48.1431	75	48.1431	81
48.1656	85	48.1656	92	48.1656	74	48.1656	73
48.1881	83	48.1881	82	48.1881	70	48.1881	88
48.2106	96	48.2106	98	48.2106	73	48.2106	57
48.2331	84	48.2331	84	48.2331	74	48.2331	75
48.2556	105	48.2556	97	48.2556	72	48.2556	59
48.2781	107	48.2781	91	48.2781	65	48.2781	69
48.3006	104	48.3006	87	48.3006	65	48.3006	76
48.3231	114	48.3231	98	48.3231	80	48.3231	75
48.3456	86	48.3456	90	48.3456	72	48.3456	70
48.3681	109	48.3681	87	48.3681	76	48.3681	90
48.3906	91	48.3906	80	48.3906	76	48.3906	72
48.4131	99	48.4131	70	48.4131	79	48.4131	77
48.4356	88	48.4356	109	48.4356	82	48.4356	74
48.4581	90	48.4581	108	48.4581	60	48.4581	65
48.4807	94	48.4807	88	48.4807	77	48.4807	61
48.5032	93	48.5032	101	48.5032	69	48.5032	74
48.5257	112	48.5257	117	48.5257	90	48.5257	75
48.5482	83	48.5482	111	48.5482	78	48.5482	80
48.5707	81	48.5707	105	48.5707	75	48.5707	90
48.5932	114	48.5932	84	48.5932	81	48.5932	78
48.6157	108	48.6157	73	48.6157	51	48.6157	76
48.6382	118	48.6382	114	48.6382	83	48.6382	69
48.6607	91	48.6607	86	48.6607	81	48.6607	86
48.6832	99	48.6832	96	48.6832	81	48.6832	54
48.7057	94	48.7057	92	48.7057	68	48.7057	64
48.7282	80	48.7282	105	48.7282	62	48.7282	70
48.7507	113	48.7507	94	48.7507	70	48.7507	73
48.7732	93	48.7732	94	48.7732	68	48.7732	88
48.7957	113	48.7957	109	48.7957	72	48.7957	63
48.8182	93	48.8182	100	48.8182	81	48.8182	70
48.8407	102	48.8407	102	48.8407	80	48.8407	75
48.8632	95	48.8632	92	48.8632	71	48.8632	92
48.8857	105	48.8857	93	48.8857	60	48.8857	84
48.9082	97	48.9082	77	48.9082	75	48.9082	82
48.9307	98	48.9307	78	48.9307	77	48.9307	83
48.9532	81	48.9532	111	48.9532	69	48.9532	82
48.9757	91	48.9757	94	48.9757	72	48.9757	90
48.9982	100	48.9982	115	48.9982	68	48.9982	64
49.0207	81	49.0207	78	49.0207	83	49.0207	68
49.0432	113	49.0432	92	49.0432	69	49.0432	82
49.0657	95	49.0657	95	49.0657	77	49.0657	76
49.0882	94	49.0882	84	49.0882	84	49.0882	89
49.1107	103	49.1107	90	49.1107	83	49.1107	76
49.1332	85	49.1332	91	49.1332	64	49.1332	72
49.1557	85	49.1557	96	49.1557	73	49.1557	91
49.1783	91	49.1783	89	49.1783	62	49.1783	84
49.2008	101	49.2008	106	49.2008	72	49.2008	86
49.2233	87	49.2233	101	49.2233	80	49.2233	81
49.2458	103	49.2458	103	49.2458	76	49.2458	86
49.2683	111	49.2683	95	49.2683	61	49.2683	84
49.2908	87	49.2908	99	49.2908	70	49.2908	64
49.3133	87	49.3133	83	49.3133	81	49.3133	73
49.3358	90	49.3358	96	49.3358	73	49.3358	58
49.3583	100	49.3583	91	49.3583	64	49.3583	71
49.3808	112	49.3808	91	49.3808	67	49.3808	85
49.4033	99	49.4033	99	49.4033	79	49.4033	71
49.4258	113	49.4258	86	49.4258	87	49.4258	67
49.4483	99	49.4483	84	49.4483	66	49.4483	82
49.4708	126	49.4708	89	49.4708	85	49.4708	77
49.4933	87	49.4933	96	49.4933	71	49.4933	70
49.5158	105	49.5158	98	49.5158	87	49.5158	77
49.5383	103	49.5383	84	49.5383	78	49.5383	58
49.5608	94	49.5608	94	49.5608	70	49.5608	80
49.5833	96	49.5833	94	49.5833	82	49.5833	74
49.6058	114	49.6058	86	49.6058	64	49.6058	74
49.6283	88	49.6283	91	49.6283	71	49.6283	89
49.6508	101	49.6508	90	49.6508	70	49.6508	79
49.6733	101	49.6733	90	49.6733	72	49.6733	75
49.6958	83	49.6958	91	49.6958	68	49.6958	71
49.7183	84	49.7183	92	49.7183	63	49.7183	71
49.7408	123	49.7408	104	49.7408	80	49.7408	75
49.7633	105	49.7633	76	49.7633	64	49.7633	73
49.7858	91	49.7858	85	49.7858	70	49.7858	59
49.8083	114	49.8083	82	49.8083	70	49.8083	61
49.8308	97	49.8308	86	49.8308	88	49.8308	66
49.8534	105	49.8534	92	49.8534	94	49.8534	69
49.8759	87	49.8759	94	49.8759	69	49.8759	65
49.8984	102	49.8984	78	49.8984	83	49.8984	70
49.9209	90	49.9209	87	49.9209	79	49.9209	76
49.9434	86	49.9434	90	49.9434	77	49.9434	59
49.9659	124	49.9659	85	49.9659	71	49.9659	77
49.9884	106	49.9884	92	49.9884	49	49.9884	86
50.0109	88	50.0109	101	50.0109	92	50.0109	67
50.0334	105	50.0334	81	50.0334	79	50.0334	93
50.0559	88	50.0559	99	50.0559	93	50.0559	72
50.0784	119	50.0784	97	50.0784	78	50.0784	67
50.1009	92	50.1009	95	50.1009	90	50.1009	69
50.1234	94	50.1234	81	50.1234	86	50.1234	81
50.1459	109	50.1459	110	50.1459	93	50.1459	79
50.1684	112	50.1684	121	50.1684	75	50.1684	62
50.1909	75	50.1909	95	50.1909	77	50.1909	97
50.2134	92	50.2134	84	50.2134	71	50.2134	72
50.2359	84	50.2359	115	50.2359	49	50.2359	78
50.2584	112	50.2584	103	50.2584	92	50.2584	90
50.2809	96	50.2809	93	50.2809	74	50.2809	75
50.3034	94	50.3034	113	50.3034	79	50.3034	77
50.3259	98	50.3259	70	50.3259	82	50.3259	62
50.3484	88	50.3484	118	50.3484	99	50.3484	69
50.3709	90	50.3709	92	50.3709	104	50.3709	68
50.3934	102	50.3934	97	50.3934	95	50.3934	65
50.4159	98	50.4159	85	50.4159	72	50.4159	84
50.4384	105	50.4384	92	50.4384	78	50.4384	81
50.4609	86	50.4609	90	50.4609	84	50.4609	82
50.4834	98	50.4834	94	50.4834	74	50.4834	76
50.5059	105	50.5059	119	50.5059	69	50.5059	72
50.5284	89	50.5284	90	50.5284	85	50.5284	74
50.551	97	50.551	83	50.551	78	50.551	73
50.5735	89	50.5735	83	50.5735	70	50.5735	87
50.596	95	50.596	90	50.596	57	50.596	65
50.6185	96	50.6185	114	50.6185	77	50.6185	74
50.641	87	50.641	85	50.641	83	50.641	70
50.6635	106	50.6635	85	50.6635	77	50.6635	70
50.686	87	50.686	82	50.686	85	50.686	70
50.7085	95	50.7085	74	50.7085	57	50.7085	91
50.731	97	50.731	77	50.731	64	50.731	96
50.7535	114	50.7535	86	50.7535	67	50.7535	75
50.776	95	50.776	93	50.776	69	50.776	62
50.7985	109	50.7985	92	50.7985	82	50.7985	85
50.821	87	50.821	93	50.821	82	50.821	67
50.8435	114	50.8435	80	50.8435	75	50.8435	72
50.866	110	50.866	90	50.866	61	50.866	68
50.8885	101	50.8885	90	50.8885	73	50.8885	73
50.911	90	50.911	90	50.911	93	50.911	102
50.9335	110	50.9335	102	50.9335	81	50.9335	70
50.956	81	50.956	88	50.956	59	50.956	63
50.9785	105	50.9785	78	50.9785	63	50.9785	81
51.001	85	51.001	78	51.001	69	51.001	81
51.0235	81	51.0235	80	51.0235	82	51.0235	64
51.046	85	51.046	84	51.046	81	51.046	80
51.0685	89	51.0685	90	51.0685	65	51.0685	80
51.091	106	51.091	76	51.091	61	51.091	72
51.1135	87	51.1135	91	51.1135	51	51.1135	91
51.136	77	51.136	90	51.136	66	51.136	73
51.1585	108	51.1585	78	51.1585	71	51.1585	64
51.181	96	51.181	88	51.181	80	51.181	74
51.2035	78	51.2035	109	51.2035	62	51.2035	57
51.226	93	51.226	75	51.226	82	51.226	78
51.2486	101	51.2486	91	51.2486	73	51.2486	85
51.2711	81	51.2711	87	51.2711	88	51.2711	78
51.2936	113	51.2936	85	51.2936	68	51.2936	87
51.3161	114	51.3161	89	51.3161	67	51.3161	73
51.3386	81	51.3386	87	51.3386	59	51.3386	54
51.3611	101	51.3611	82	51.3611	63	51.3611	92
51.3836	80	51.3836	94	51.3836	69	51.3836	63
51.4061	88	51.4061	80	51.4061	77	51.4061	68
51.4286	95	51.4286	78	51.4286	92	51.4286	63
51.4511	100	51.4511	77	51.4511	66	51.4511	69
51.4736	92	51.4736	100	51.4736	59	51.4736	78
51.4961	81	51.4961	99	51.4961	72	51.4961	66
51.5186	104	51.5186	83	51.5186	86	51.5186	89
51.5411	81	51.5411	91	51.5411	59	51.5411	63
51.5636	85	51.5636	87	51.5636	67	51.5636	66
51.5861	86	51.5861	74	51.5861	73	51.5861	64
51.6086	100	51.6086	96	51.6086	54	51.6086	78
51.6311	87	51.6311	83	51.6311	93	51.6311	81
51.6536	91	51.6536	76	51.6536	68	51.6536	89
51.6761	94	51.6761	87	51.6761	64	51.6761	79
51.6986	90	51.6986	78	51.6986	67	51.6986	85
51.7211	89	51.7211	100	51.7211	76	51.7211	79
51.7436	90	51.7436	104	51.7436	73	51.7436	82
51.7661	91	51.7661	107	51.7661	78	51.7661	71
51.7886	97	51.7886	69	51.7886	82	51.7886	59
51.8111	78	51.8111	82	51.8111	78	51.8111	69
51.8336	102	51.8336	88	51.8336	76	51.8336	70
51.8561	95	51.8561	84	51.8561	80	51.8561	81
51.8786	73	51.8786	87	51.8786	76	51.8786	69
51.9011	93	51.9011	80	51.9011	73	51.9011	67
51.9236	81	51.9236	78	51.9236	74	51.9236	53
51.9462	86	51.9462	89	51.9462	67	51.9462	82
51.9687	100	51.9687	76	51.9687	78	51.9687	60
51.9912	109	51.9912	87	51.9912	66	51.9912	76
52.0137	96	52.0137	77	52.0137	63	52.0137	84
52.0362	114	52.0362	109	52.0362	83	52.0362	71
52.0587	74	52.0587	80	52.0587	79	52.0587	78
52.0812	100	52.0812	70	52.0812	75	52.0812	77
52.1037	86	52.1037	95	52.1037	70	52.1037	77
52.1262	99	52.1262	107	52.1262	71	52.1262	73
52.1487	110	52.1487	88	52.1487	71	52.1487	65
52.1712	101	52.1712	87	52.1712	66	52.1712	71
52.1937	69	52.1937	101	52.1937	68	52.1937	79
52.2162	92	52.2162	87	52.2162	77	52.2162	79
52.2387	108	52.2387	78	52.2387	57	52.2387	71
52.2612	83	52.2612	88	52.2612	71	52.2612	82
52.2837	94	52.2837	60	52.2837	80	52.2837	72
52.3062	84	52.3062	77	52.3062	58	52.3062	52
52.3287	92	52.3287	84	52.3287	58	52.3287	77
52.3512	89	52.3512	83	52.3512	73	52.3512	65
52.3737	83	52.3737	81	52.3737	73	52.3737	72
52.3962	92	52.3962	94	52.3962	65	52.3962	81
52.4187	110	52.4187	83	52.4187	71	52.4187	78
52.4412	96	52.4412	88	52.4412	61	52.4412	65
52.4637	68	52.4637	93	52.4637	69	52.4637	92
52.4862	97	52.4862	87	52.4862	72	52.4862	73
52.5087	101	52.5087	77	52.5087	73	52.5087	81
52.5312	82	52.5312	89	52.5312	77	52.5312	59
52.5537	81	52.5537	101	52.5537	68	52.5537	84
52.5762	99	52.5762	69	52.5762	77	52.5762	91
52.5987	99	52.5987	83	52.5987	68	52.5987	78
52.6213	91	52.6213	93	52.6213	69	52.6213	56
52.6438	94	52.6438	98	52.6438	72	52.6438	81
52.6663	94	52.6663	83	52.6663	55	52.6663	77
52.6888	94	52.6888	92	52.6888	66	52.6888	71
52.7113	92	52.7113	103	52.7113	69	52.7113	65
52.7338	101	52.7338	80	52.7338	59	52.7338	89
52.7563	115	52.7563	94	52.7563	77	52.7563	80
52.7788	113	52.7788	94	52.7788	70	52.7788	71
52.8013	109	52.8013	99	52.8013	71	52.8013	79
52.8238	92	52.8238	96	52.8238	71	52.8238	69
52.8463	72	52.8463	82	52.8463	62	52.8463	65
52.8688	96	52.8688	84	52.8688	83	52.8688	74
52.8913	89	52.8913	77	52.8913	69	52.8913	69
52.9138	97	52.9138	89	52.9138	61	52.9138	68
52.9363	85	52.9363	97	52.9363	70	52.9363	77
52.9588	83	52.9588	71	52.9588	67	52.9588	75
52.9813	105	52.9813	89	52.9813	80	52.9813	74
53.0038	97	53.0038	100	53.0038	72	53.0038	75
53.0263	95	53.0263	97	53.0263	58	53.0263	85
53.0488	108	53.0488	86	53.0488	65	53.0488	83
53.0713	100	53.0713	88	53.0713	74	53.0713	75
53.0938	96	53.0938	92	53.0938	62	53.0938	92
53.1163	117	53.1163	88	53.1163	62	53.1163	78
53.1388	105	53.1388	99	53.1388	78	53.1388	69
53.1613	101	53.1613	97	53.1613	62	53.1613	88
53.1838	90	53.1838	107	53.1838	71	53.1838	85
53.2063	107	53.2063	76	53.2063	51	53.2063	81
53.2288	97	53.2288	83	53.2288	65	53.2288	74
53.2513	104	53.2513	91	53.2513	78	53.2513	73
53.2738	92	53.2738	71	53.2738	67	53.2738	71
53.2963	81	53.2963	82	53.2963	79	53.2963	76
53.3189	76	53.3189	97	53.3189	88	53.3189	77
53.3414	81	53.3414	78	53.3414	61	53.3414	72
53.3639	93	53.3639	83	53.3639	77	53.3639	67
53.3864	96	53.3864	82	53.3864	66	53.3864	75
53.4089	92	53.4089	92	53.4089	54	53.4089	77
53.4314	95	53.4314	86	53.4314	65	53.4314	89
53.4539	103	53.4539	86	53.4539	84	53.4539	73
53.4764	95	53.4764	86	53.4764	67	53.4764	77
53.4989	96	53.4989	76	53.4989	68	53.4989	88
53.5214	97	53.5214	91	53.5214	63	53.5214	86
53.5439	80	53.5439	82	53.5439	59	53.5439	76
53.5664	98	53.5664	85	53.5664	71	53.5664	66
53.5889	102	53.5889	89	53.5889	81	53.5889	89
53.6114	90	53.6114	84	53.6114	72	53.6114	67
53.6339	77	53.6339	75	53.6339	76	53.6339	68
53.6564	89	53.6564	85	53.6564	73	53.6564	83
53.6789	75	53.6789	112	53.6789	73	53.6789	69
53.7014	90	53.7014	86	53.7014	72	53.7014	67
53.7239	83	53.7239	99	53.7239	61	53.7239	82
53.7464	88	53.7464	90	53.7464	79	53.7464	89
53.7689	82	53.7689	76	53.7689	69	53.7689	79
53.7914	91	53.7914	103	53.7914	69	53.7914	72
53.8139	81	53.8139	87	53.8139	67	53.8139	65
53.8364	92	53.8364	94	53.8364	54	53.8364	86
53.8589	94	53.8589	82	53.8589	86	53.8589	58
53.8814	88	53.8814	82	53.8814	69	53.8814	54
53.9039	88	53.9039	82	53.9039	75	53.9039	84
53.9264	82	53.9264	84	53.9264	73	53.9264	58
53.9489	92	53.9489	83	53.9489	68	53.9489	80
53.9714	95	53.9714	79	53.9714	63	53.9714	85
53.9939	90	53.9939	74	53.9939	65	53.9939	68
54.0165	113	54.0165	84	54.0165	70	54.0165	57
54.039	93	54.039	88	54.039	71	54.039	70
54.0615	93	54.0615	108	54.0615	57	54.0615	58
54.084	95	54.084	83	54.084	71	54.084	74
54.1065	104	54.1065	96	54.1065	65	54.1065	72
54.129	105	54.129	110	54.129	71	54.129	77
54.1515	92	54.1515	75	54.1515	69	54.1515	71
54.174	87	54.174	90	54.174	59	54.174	81
54.1965	89	54.1965	84	54.1965	83	54.1965	73
54.219	101	54.219	109	54.219	80	54.219	66
54.2415	87	54.2415	81	54.2415	63	54.2415	68
54.264	84	54.264	78	54.264	73	54.264	68
54.2865	109	54.2865	92	54.2865	68	54.2865	87
54.309	95	54.309	92	54.309	75	54.309	53
54.3315	110	54.3315	75	54.3315	66	54.3315	62
54.354	89	54.354	82	54.354	77	54.354	77
54.3765	98	54.3765	87	54.3765	71	54.3765	57
54.399	97	54.399	91	54.399	58	54.399	91
54.4215	89	54.4215	76	54.4215	68	54.4215	68
54.444	97	54.444	91	54.444	65	54.444	68
54.4665	86	54.4665	93	54.4665	82	54.4665	72
54.489	101	54.489	87	54.489	72	54.489	79
54.5115	90	54.5115	79	54.5115	67	54.5115	60
54.534	88	54.534	102	54.534	59	54.534	84
54.5565	77	54.5565	93	54.5565	59	54.5565	66
54.579	79	54.579	85	54.579	76	54.579	68
54.6015	98	54.6015	74	54.6015	61	54.6015	69
54.624	89	54.624	72	54.624	58	54.624	82
54.6465	108	54.6465	76	54.6465	80	54.6465	66
54.669	96	54.669	96	54.669	75	54.669	85
54.6915	86	54.6915	98	54.6915	78	54.6915	73
54.7141	88	54.7141	79	54.7141	58	54.7141	66
54.7366	102	54.7366	95	54.7366	76	54.7366	74
54.7591	96	54.7591	86	54.7591	71	54.7591	68
54.7816	99	54.7816	103	54.7816	62	54.7816	58
54.8041	98	54.8041	84	54.8041	79	54.8041	71
54.8266	91	54.8266	64	54.8266	73	54.8266	69
54.8491	85	54.8491	93	54.8491	65	54.8491	69
54.8716	83	54.8716	85	54.8716	74	54.8716	88
54.8941	87	54.8941	81	54.8941	72	54.8941	64
54.9166	92	54.9166	84	54.9166	84	54.9166	69
[truncated: 1,559 more rows]

## Sheet: Fig2(b)
Wavenumber	Transmittance	Wavenumber	Transmittance	Wavenumber	Transmittance	Wavenumber	Transmittance
cm-1	%	cm-1	%	cm-1	%	cm-1	%
	SN-800		SN-1350		SN-1450		SN-1550
400.157	30.8552	400.157	52.5552	400.157	62.0466	400.157	49.2806
400.639	30.917	400.639	52.6097	400.639	62.0456	400.639	49.1164
401.121	31.0132	401.121	52.7652	401.121	62.0638	401.121	48.9694
401.603	31.1626	401.603	53.0174	401.603	62.1265	401.603	48.8812
402.085	31.374	402.085	53.3468	402.085	62.2497	402.085	48.8927
402.567	31.6299	402.567	53.7109	402.567	62.4266	402.567	49.0202
403.05	31.8864	403.05	54.0478	403.05	62.6257	403.05	49.242
403.532	32.0881	403.532	54.294	403.532	62.8051	403.532	49.5068
404.014	32.192	404.014	54.4072	404.014	62.9327	404.014	49.7574
404.496	32.1853	404.496	54.3835	404.496	63.0017	404.496	49.9566
404.978	32.0909	404.978	54.2611	404.978	63.0307	404.978	50.1011
405.46	31.9578	405.46	54.1071	405.46	63.053	405.46	50.2164
405.942	31.8397	405.942	53.9901	405.942	63.0971	405.942	50.3375
406.424	31.7721	406.424	53.9479	406.424	63.1734	406.424	50.4835
406.906	31.7578	406.906	53.9661	406.906	63.2722	406.906	50.6389
407.389	31.7692	407.389	53.9806	407.389	63.3775	407.389	50.7555
407.871	31.7664	407.871	53.9032	407.871	63.4853	407.871	50.7694
408.353	31.7174	408.353	53.6573	408.353	63.615	408.353	50.6265
408.835	31.6344	408.835	53.2226	408.835	63.8297	408.835	50.3158
409.317	31.5208	409.317	52.6179	409.317	64.1533	409.317	49.8539
409.799	31.3609	409.799	51.8949	409.799	64.5306	409.799	49.2807
410.281	31.1368	410.281	51.1219	410.281	64.8657	410.281	48.642
410.763	30.9933	410.763	50.5226	410.763	65.2209	410.763	48.1124
411.245	30.895	411.245	50.1134	411.245	65.4537	411.245	47.7104
411.728	30.8498	411.728	49.9785	411.728	65.4996	411.728	47.5131
412.21	30.8437	412.21	50.098	412.21	65.3076	412.21	47.52
412.692	30.8951	412.692	50.4648	412.692	64.9277	412.692	47.7345
413.174	31.0072	413.174	51.015	413.174	64.4566	413.174	48.1054
413.656	31.1931	413.656	51.7283	413.656	63.9595	413.656	48.6267
414.138	31.3265	414.138	52.4044	414.138	63.4468	414.138	49.1137
414.62	31.4935	414.62	53.0512	414.62	63.0759	414.62	49.5552
415.103	31.6501	415.103	53.5856	415.103	62.8616	415.103	49.8743
415.585	31.7583	415.585	53.9617	415.585	62.7516	415.585	50.0306
416.067	31.8187	416.067	54.1855	416.067	62.7132	416.067	50.0396
416.549	31.8573	416.549	54.2952	416.549	62.7316	416.549	49.9536
417.031	31.9077	417.031	54.3445	417.031	62.8018	417.031	49.845
417.513	31.9641	417.513	54.3645	417.513	62.8625	417.513	49.7697
417.995	32.0291	417.995	54.3824	417.995	62.924	417.995	49.7485
418.477	32.0474	418.477	54.3712	418.477	62.8977	418.477	49.7521
418.959	32.0717	418.959	54.3414	418.959	62.8516	418.959	49.7644
419.442	32.0286	419.442	54.2815	419.442	62.7174	419.442	49.7466
419.924	31.9269	419.924	54.1739	419.924	62.5162	419.924	49.6596
420.406	31.7998	420.406	54.029	420.406	62.304	420.406	49.5077
420.888	31.7055	420.888	53.8956	420.888	62.1332	420.888	49.3465
421.37	31.6721	421.37	53.797	421.37	62.0317	421.37	49.2182
421.852	31.667	421.852	53.7402	421.852	61.9928	421.852	49.1312
422.334	31.7473	422.334	53.7471	422.334	62.0336	422.334	49.1138
422.816	31.895	422.816	53.8078	422.816	62.1771	422.816	49.1597
423.298	32.0455	423.298	53.8775	423.298	62.3323	423.298	49.2238
423.781	32.1184	423.781	53.8718	423.781	62.3925	423.781	49.241
424.263	32.173	424.263	53.8908	424.263	62.4469	424.263	49.2553
424.745	32.1977	424.745	53.9339	424.745	62.4791	424.745	49.2612
425.227	32.1922	425.227	53.9953	425.227	62.4856	425.227	49.2568
425.709	32.1791	425.709	54.0743	425.709	62.4982	425.709	49.2439
426.191	32.2114	426.191	54.2077	426.191	62.5987	426.191	49.2406
426.673	32.2537	426.673	54.369	426.673	62.7234	426.673	49.2401
427.155	32.3054	427.155	54.5197	427.155	62.858	427.155	49.2297
427.637	32.3672	427.637	54.6463	427.637	62.9879	427.637	49.215
428.12	32.4393	428.12	54.7435	428.12	63.101	428.12	49.209
428.602	32.513	428.602	54.8052	428.602	63.181	428.602	49.2223
429.084	32.6018	429.084	54.8708	429.084	63.253	429.084	49.2835
429.566	32.6725	429.566	54.9212	429.566	63.285	429.566	49.3773
430.048	32.7522	430.048	54.9931	430.048	63.3317	430.048	49.5113
430.53	32.7768	430.53	55.0725	430.53	63.3285	430.53	49.6509
431.012	32.7687	431.012	55.1344	431.012	63.3089	431.012	49.7678
431.494	32.7186	431.494	55.16	431.494	63.2504	431.494	49.8447
431.977	32.6495	431.977	55.1462	431.977	63.1692	431.977	49.883
432.459	32.593	432.459	55.1029	432.459	63.0921	432.459	49.8985
432.941	32.5735	432.941	55.0474	432.941	63.038	432.941	49.9121
433.423	32.5988	433.423	54.9808	433.423	63.0321	433.423	49.9209
433.905	32.6605	433.905	54.9248	433.905	63.0668	433.905	49.9352
434.387	32.7323	434.387	54.8761	434.387	63.1337	434.387	49.9345
434.869	32.784	434.869	54.8341	434.869	63.1956	434.869	49.9123
435.351	32.7943	435.351	54.8042	435.351	63.2212	435.351	49.8725
435.834	32.7683	435.834	54.7909	435.834	63.2072	435.834	49.8284
436.316	32.7415	436.316	54.8039	436.316	63.1865	436.316	49.8074
436.798	32.7306	436.798	54.8486	436.798	63.1628	436.798	49.829
437.28	32.6869	437.28	54.8563	437.28	63.0757	437.28	49.835
437.762	32.6845	437.762	54.8688	437.762	63.032	437.762	49.8728
438.244	32.6825	438.244	54.8688	438.244	63.0043	438.244	49.9034
438.726	32.6885	438.726	54.8438	438.726	63.0188	438.726	49.9005
439.208	32.6876	439.208	54.8081	439.208	63.0608	439.208	49.8601
439.69	32.6814	439.69	54.7914	439.69	63.1255	439.69	49.7971
440.173	32.6701	440.173	54.8019	440.173	63.1923	440.173	49.7271
440.655	32.6842	440.655	54.8676	440.655	63.2748	440.655	49.6864
441.137	32.7099	441.137	54.9806	441.137	63.3398	441.137	49.6859
441.619	32.7589	441.619	55.1089	441.619	63.4008	441.619	49.7114
442.101	32.7903	442.101	55.2211	442.101	63.4037	442.101	49.7423
442.583	32.7912	442.583	55.2823	442.583	63.3695	442.583	49.754
443.065	32.7422	443.065	55.2693	443.065	63.2912	443.065	49.7322
443.547	32.6416	443.547	55.1962	443.547	63.1866	443.547	49.6822
444.029	32.4958	444.029	55.0869	444.029	63.0667	444.029	49.611
444.512	32.4366	444.512	55.0455	444.512	63.084	444.512	49.5508
444.994	32.3723	444.994	55.0179	444.994	63.0803	444.994	49.549
445.476	32.3267	445.476	55.034	445.476	63.0987	445.476	49.5584
445.958	32.342	445.958	55.0577	445.958	63.1839	445.958	49.5614
446.44	32.3955	446.44	55.1209	446.44	63.2462	446.44	49.5871
446.922	32.4707	446.922	55.1697	446.922	63.2784	446.922	49.6046
447.404	32.5553	447.404	55.187	447.404	63.2798	447.404	49.6095
447.886	32.6544	447.886	55.1694	447.886	63.2836	447.886	49.6075
448.368	32.7113	448.368	55.1045	448.368	63.2635	448.368	49.5853
448.851	32.8256	448.851	55.0838	448.851	63.2983	448.851	49.5994
449.333	32.9553	449.333	55.1054	449.333	63.3718	449.333	49.6539
449.815	33.0093	449.815	55.0748	449.815	63.3833	449.815	49.6627
450.297	33.0511	450.297	55.0609	450.297	63.3996	450.297	49.6664
450.779	33.0702	450.779	55.0112	450.779	63.4011	450.779	49.6333
451.261	33.0529	451.261	54.9707	451.261	63.3523	451.261	49.6053
451.743	33.0282	451.743	54.9408	451.743	63.2979	451.743	49.5875
452.226	33.0168	452.226	54.9549	452.226	63.2656	452.226	49.6042
452.708	33.0268	452.708	55.0301	452.708	63.2685	452.708	49.6602
453.19	33.0272	453.19	55.1268	453.19	63.2645	453.19	49.7184
453.672	33.0495	453.672	55.285	453.672	63.2983	453.672	49.7823
454.154	33.0609	454.154	55.4482	454.154	63.3189	454.154	49.8079
454.636	33.0505	454.636	55.5878	454.636	63.3012	454.636	49.7843
455.118	33.0207	455.118	55.6886	455.118	63.2444	455.118	49.7208
455.6	32.9852	455.6	55.7481	455.6	63.1819	455.6	49.6357
456.082	32.9631	456.082	55.783	456.082	63.1451	456.082	49.5673
456.565	32.9687	456.565	55.8119	456.565	63.1658	456.565	49.5439
457.047	32.9836	457.047	55.8364	457.047	63.23	457.047	49.5616
457.529	33.0374	457.529	55.8918	457.529	63.384	457.529	49.6352
458.011	33.1041	458.011	55.9492	458.011	63.5785	458.011	49.7227
458.493	33.1378	458.493	55.98	458.493	63.7355	458.493	49.7681
458.975	33.1789	458.975	56.0183	458.975	63.9052	458.975	49.8088
459.457	33.1806	459.457	56.1009	459.457	64.0036	459.457	49.8585
459.939	33.1717	459.939	56.1411	459.939	64.0569	459.939	49.862
460.421	33.1604	460.421	56.2344	460.421	64.1055	460.421	49.9038
460.904	33.1442	460.904	56.3334	460.904	64.14	460.904	49.9523
461.386	33.1212	461.386	56.4173	461.386	64.1638	461.386	49.9898
461.868	33.0973	461.868	56.4506	461.868	64.1706	461.868	49.9938
462.35	33.0765	462.35	56.4115	462.35	64.1618	462.35	49.941
462.832	33.0492	462.832	56.3273	462.832	64.1078	462.832	49.8459
463.314	33.0481	463.314	56.2285	463.314	64.0403	463.314	49.7355
463.796	33.0878	463.796	56.1493	463.796	63.9978	463.796	49.6309
464.278	33.1415	464.278	56.087	464.278	63.9545	464.278	49.5443
464.76	33.2159	464.76	56.0876	464.76	63.95	464.76	49.5057
465.243	33.2638	465.243	56.1175	465.243	63.9468	465.243	49.4976
465.725	33.3169	465.725	56.2354	465.725	64.0072	465.725	49.5518
466.207	33.3371	466.207	56.3874	466.207	64.0902	466.207	49.6354
466.689	33.3184	466.689	56.554	466.689	64.1724	466.689	49.7389
467.171	33.255	467.171	56.7018	467.171	64.235	467.171	49.8322
467.653	33.178	467.653	56.8332	467.653	64.2859	467.653	49.9207
468.135	33.1059	468.135	56.9407	468.135	64.3195	468.135	49.9962
468.617	33.05	468.617	57.0152	468.617	64.3276	468.617	50.0469
469.099	32.9941	469.099	57.0317	469.099	64.272	469.099	50.0468
469.582	32.9834	469.582	57.0227	469.582	64.2107	469.582	50.0218
470.064	32.999	470.064	56.9756	470.064	64.1175	470.064	49.9633
470.546	33.058	470.546	56.9202	470.546	64.0257	470.546	49.8941
471.028	33.166	471.028	56.8512	471.028	63.9929	471.028	49.8174
471.51	33.3224	471.51	56.835	471.51	63.9666	471.51	49.7924
471.992	33.5103	471.992	56.8518	471.992	63.996	471.992	49.778
472.474	33.701	472.474	56.9071	472.474	64.0573	472.474	49.765
472.957	33.8595	472.957	56.9699	472.957	64.1336	472.957	49.7589
473.439	33.9811	473.439	57.0341	473.439	64.2652	473.439	49.726
473.921	34.0243	473.921	57.0398	473.921	64.3649	473.921	49.6495
474.403	33.9971	474.403	56.9805	474.403	64.4239	474.403	49.5398
474.885	33.8891	474.885	56.8539	474.885	64.4434	474.885	49.4017
475.367	33.7357	475.367	56.7123	475.367	64.3818	475.367	49.2991
475.849	33.5407	475.849	56.5602	475.849	64.2329	475.849	49.1937
476.331	33.3821	476.331	56.4788	476.331	64.1009	476.331	49.17
476.813	33.2432	476.813	56.4342	476.813	63.9823	476.813	49.162
477.296	33.1605	477.296	56.4367	477.296	63.9027	477.296	49.1694
477.778	33.1128	477.778	56.4864	477.778	63.8666	477.778	49.1835
478.26	33.1292	478.26	56.6276	478.26	63.8671	478.26	49.2496
478.742	33.1998	478.742	56.8076	478.742	63.914	478.742	49.3346
479.224	33.3146	479.224	56.985	479.224	64.022	479.224	49.4347
479.706	33.4728	479.706	57.1894	479.706	64.1982	479.706	49.5754
480.188	33.6369	480.188	57.3921	480.188	64.3811	480.188	49.7468
480.67	33.8092	480.67	57.5527	480.67	64.6068	480.67	49.9049
481.152	33.9465	481.152	57.6609	481.152	64.8079	481.152	50.0324
481.635	34.0219	481.635	57.6973	481.635	64.9437	481.635	50.1018
482.117	34.0428	482.117	57.6889	482.117	65.0188	482.117	50.1376
482.599	34.0243	482.599	57.6656	482.599	65.036	482.599	50.1639
483.081	33.9879	483.081	57.6516	483.081	65.0289	483.081	50.1966
483.563	33.9185	483.563	57.622	483.563	64.9665	483.563	50.225
484.045	33.8286	484.045	57.6039	484.045	64.8468	484.045	50.2395
484.527	33.7591	484.527	57.6352	484.527	64.7283	484.527	50.2893
485.009	33.6871	485.009	57.6531	485.009	64.6119	485.009	50.3035
485.491	33.6367	485.491	57.6445	485.491	64.5144	485.491	50.2755
485.974	33.5492	485.974	57.5533	485.974	64.3664	485.974	50.1813
486.456	33.5406	486.456	57.5398	486.456	64.2894	486.456	50.1511
486.938	33.543	486.938	57.4965	486.938	64.2056	486.938	50.1133
487.42	33.551	487.42	57.3881	487.42	64.1603	487.42	50.0481
487.902	33.5775	487.902	57.2925	487.902	64.1144	487.902	50.0217
488.384	33.6066	488.384	57.1923	488.384	64.0776	488.384	49.999
488.866	33.6351	488.866	57.0827	488.866	64.0462	488.866	49.957
489.348	33.6536	489.348	56.9576	489.348	64.0129	489.348	49.8661
489.831	33.6666	489.831	56.8564	489.831	63.9742	489.831	49.7547
490.313	33.6888	490.313	56.7873	490.313	63.961	490.313	49.6307
490.795	33.7376	490.795	56.7563	490.795	63.9864	490.795	49.5221
491.277	33.8163	491.277	56.755	491.277	64.0579	491.277	49.4446
491.759	33.9099	491.759	56.7833	491.759	64.1276	491.759	49.4005
492.241	34.0318	492.241	56.8464	492.241	64.2241	492.241	49.4229
492.723	34.132	492.723	56.8416	492.723	64.3275	492.723	49.4197
493.205	34.2248	493.205	56.8503	493.205	64.3799	493.205	49.4381
493.688	34.2691	493.688	56.8107	493.688	64.4089	493.688	49.4231
494.17	34.3075	494.17	56.841	494.17	64.3774	494.17	49.4638
494.652	34.3203	494.652	56.8697	494.652	64.3495	494.652	49.4767
495.134	34.3338	495.134	56.9242	495.134	64.3614	495.134	49.4995
495.616	34.3408	495.616	57.0021	495.616	64.3782	495.616	49.5497
496.098	34.3557	496.098	57.1109	496.098	64.4169	496.098	49.6341
496.58	34.3717	496.58	57.2178	496.58	64.476	496.58	49.724
497.062	34.3867	497.062	57.2707	497.062	64.5434	497.062	49.7765
497.544	34.3931	497.544	57.3152	497.544	64.5913	497.544	49.8307
498.027	34.3943	498.027	57.3331	498.027	64.6201	498.027	49.8665
498.509	34.3493	498.509	57.3002	498.509	64.5833	498.509	49.8674
498.991	34.3369	498.991	57.2435	498.991	64.5702	498.991	49.8619
499.473	34.3438	499.473	57.1935	499.473	64.5972	499.473	49.856
499.955	34.3153	499.955	57.1245	499.955	64.5673	499.955	49.8285
500.437	34.3086	500.437	57.0862	500.437	64.5494	500.437	49.8445
500.919	34.2959	500.919	57.0247	500.919	64.5372	500.919	49.8422
501.401	34.3017	501.401	56.9911	501.401	64.5225	501.401	49.8592
501.884	34.3344	501.884	56.9897	501.884	64.5254	501.884	49.8886
502.366	34.358	502.366	56.9633	502.366	64.51	502.366	49.891
502.848	34.4029	502.848	56.965	502.848	64.5101	502.848	49.9111
503.33	34.448	503.33	56.9906	503.33	64.5076	503.33	49.9389
503.812	34.4755	503.812	57.0098	503.812	64.5192	503.812	49.9491
504.294	34.509	504.294	57.0494	504.294	64.5392	504.294	49.9803
504.776	34.5317	504.776	57.0917	504.776	64.5683	504.776	50.018
505.258	34.5451	505.258	57.1227	505.258	64.6132	505.258	50.0522
505.74	34.5791	505.74	57.1347	505.74	64.6955	505.74	50.0987
506.223	34.6222	506.223	57.1665	506.223	64.7923	506.223	50.1728
506.705	34.6725	506.705	57.1779	506.705	64.8766	506.705	50.2372
507.187	34.7279	507.187	57.1595	507.187	64.96	507.187	50.2812
507.669	34.7835	507.669	57.1493	507.669	64.9943	507.669	50.3252
508.151	34.8199	508.151	57.1257	508.151	64.982	508.151	50.3402
508.633	34.8375	508.633	57.0758	508.633	64.9397	508.633	50.3134
509.115	34.8244	509.115	56.9812	509.115	64.8988	509.115	50.2212
509.597	34.8181	509.597	56.9344	509.597	64.845	509.597	50.156
510.079	34.7744	510.079	56.9066	510.079	64.7492	510.079	50.0982
510.562	34.7513	510.562	56.8829	510.562	64.7225	510.562	50.0401
511.044	34.7252	511.044	56.8287	511.044	64.7079	511.044	49.9489
511.526	34.7061	511.526	56.8188	511.526	64.7268	511.526	49.8871
512.008	34.6858	512.008	56.8006	512.008	64.744	512.008	49.8152
512.49	34.6491	512.49	56.7593	512.49	64.728	512.49	49.7334
512.972	34.6075	512.972	56.7028	512.972	64.6861	512.972	49.6519
513.454	34.6049	513.454	56.6678	513.454	64.6746	513.454	49.5891
513.936	34.6178	513.936	56.633	513.936	64.6602	513.936	49.5573
514.418	34.648	514.418	56.599	514.418	64.6497	514.418	49.5633
514.901	34.6914	514.901	56.5622	514.901	64.6436	514.901	49.6028
515.383	34.7375	515.383	56.5159	515.383	64.6352	515.383	49.6607
515.865	34.776	515.865	56.4562	515.865	64.6158	515.865	49.7189
516.347	34.7997	516.347	56.3558	516.347	64.6116	516.347	49.7322
516.829	34.8198	516.829	56.2715	516.829	64.5726	516.829	49.7517
517.311	34.8277	517.311	56.2258	517.311	64.5172	517.311	49.7715
517.793	34.8738	517.793	56.2237	517.793	64.517	517.793	49.7967
518.275	34.9106	518.275	56.2912	518.275	64.5374	518.275	49.7971
518.758	34.9833	518.758	56.3934	518.758	64.5507	518.758	49.871
519.24	35.0349	519.24	56.4658	519.24	64.5679	519.24	49.9086
519.722	35.0754	519.722	56.5277	519.722	64.5786	519.722	49.9331
520.204	35.1002	520.204	56.5657	520.204	64.5751	520.204	49.9397
520.686	35.1123	520.686	56.5776	520.686	64.559	520.686	49.9316
521.168	35.1209	521.168	56.5714	521.168	64.5402	521.168	49.9195
521.65	35.1365	521.65	56.5587	521.65	64.5326	521.65	49.9158
522.132	35.1663	522.132	56.5477	522.132	64.5481	522.132	49.9277
522.615	35.2002	522.615	56.5374	522.615	64.5766	522.615	49.9524
523.097	35.2372	523.097	56.4919	523.097	64.6539	523.097	49.95
523.579	35.2915	523.579	56.4692	523.579	64.7379	523.579	49.9746
524.061	35.3014	524.061	56.4212	524.061	64.776	524.061	49.9794
524.543	35.2677	524.543	56.3302	524.543	64.7645	524.543	49.9541
525.025	35.2347	525.025	56.2582	525.025	64.7553	525.025	49.9357
525.507	35.182	525.507	56.1946	525.507	64.7125	525.507	49.9225
525.989	35.1632	525.989	56.164	525.989	64.7045	525.989	49.9311
526.471	35.1657	526.471	56.1624	526.471	64.711	526.471	49.9588
526.954	35.1632	526.954	56.1555	526.954	64.6977	526.954	49.9826
527.436	35.16	527.436	56.1629	527.436	64.656	527.436	50.017
527.918	35.1977	527.918	56.186	527.918	64.6435	527.918	50.0625
528.4	35.2375	528.4	56.1734	528.4	64.6484	528.4	50.074
528.882	35.2889	528.882	56.1541	528.882	64.6584	528.882	50.0848
529.364	35.3511	529.364	56.1337	529.364	64.6728	529.364	50.1037
529.846	35.4209	529.846	56.1169	529.846	64.6899	529.846	50.1364
530.328	35.4917	530.328	56.1043	530.328	64.7055	530.328	50.1815
530.811	35.5543	530.811	56.0929	530.811	64.7143	530.811	50.2315
531.293	35.6005	531.293	56.0792	531.293	64.7133	531.293	50.2762
531.775	35.627	531.775	56.0638	531.775	64.7052	531.775	50.3092
532.257	35.6372	532.257	56.0527	532.257	64.699	532.257	50.3302
532.739	35.64	532.739	56.0564	532.739	64.7071	532.739	50.3453
533.221	35.6461	533.221	56.084	533.221	64.7395	533.221	50.3617
533.703	35.6642	533.703	56.1384	533.703	64.7988	533.703	50.383
534.185	35.6958	534.185	56.2118	534.185	64.8744	534.185	50.4055
534.667	35.7354	534.667	56.2874	534.667	64.9464	534.667	50.4195
535.149	35.7747	535.149	56.3459	535.149	64.9927	535.149	50.4144
535.632	35.805	535.632	56.3725	535.632	64.9974	535.632	50.385
536.114	35.8214	536.114	56.3628	536.114	64.9569	536.114	50.3357
536.596	35.8232	536.596	56.3244	536.596	64.8812	536.596	50.2798
537.078	35.8137	537.078	56.2726	537.078	64.7903	537.078	50.234
537.56	35.7975	537.56	56.2234	537.56	64.7063	537.56	50.2113
538.042	35.7778	538.042	56.1872	538.042	64.6443	538.042	50.2149
538.524	35.7561	538.524	56.1651	538.524	64.608	538.524	50.2378
539.006	35.7286	539.006	56.1149	539.006	64.6209	539.006	50.2295
539.489	35.7309	539.489	56.108	539.489	64.6388	539.489	50.2564
539.971	35.7266	539.971	56.0872	539.971	64.6378	539.971	50.2628
540.453	35.7399	540.453	56.0566	540.453	64.6349	540.453	50.2535
540.935	35.7746	540.935	56.0183	540.935	64.6309	540.935	50.234
541.417	35.8133	541.417	55.9887	541.417	64.5913	541.417	50.2258
541.899	35.8931	541.899	55.9842	541.899	64.5764	541.899	50.2424
542.381	35.9619	542.381	55.9569	542.381	64.5742	542.381	50.2371
542.863	36.0173	542.863	55.9322	542.863	64.5679	542.863	50.2339
543.346	36.0516	543.346	55.9078	543.346	64.554	543.346	50.2288
543.828	36.0439	543.828	55.8557	543.828	64.5043	543.828	50.2055
544.31	36.0411	544.31	55.8266	544.31	64.4738	544.31	50.1941
544.792	36.0364	544.792	55.799	544.792	64.445	544.792	50.1851
545.274	36.048	545.274	55.7847	545.274	64.4347	545.274	50.1866
545.756	36.0502	545.756	55.7444	545.756	64.4054	545.756	50.1753
546.238	36.0577	546.238	55.6844	546.238	64.4035	546.238	50.1389
546.72	36.0751	546.72	55.6467	546.72	64.386	546.72	50.1204
547.202	36.0881	547.202	55.6132	547.202	64.3591	547.202	50.0975
547.685	36.0958	547.685	55.5942	547.685	64.3214	547.685	50.0784
548.167	36.1011	548.167	55.5964	548.167	64.28	548.167	50.0705
548.649	36.1084	548.649	55.6092	548.649	64.257	548.649	50.0665
549.131	36.1184	549.131	55.6457	549.131	64.2371	549.131	50.085
549.613	36.1441	549.613	55.6987	549.613	64.2361	549.613	50.1234
550.095	36.182	550.095	55.7533	550.095	64.2488	550.095	50.1701
550.577	36.2243	550.577	55.7951	550.577	64.2661	550.577	50.2105
551.059	36.2618	551.059	55.816	551.059	64.2785	551.059	50.2334
551.542	36.2846	551.542	55.8152	551.542	64.2774	551.542	50.233
552.024	36.2983	552.024	55.8155	552.024	64.2742	552.024	50.2205
552.506	36.3041	552.506	55.832	552.506	64.2738	552.506	50.2052
552.988	36.2713	552.988	55.8305	552.988	64.237	552.988	50.1704
553.47	36.2142	553.47	55.8131	553.47	64.2007	553.47	50.1096
553.952	36.1512	553.952	55.8113	553.952	64.1429	553.952	50.0605
554.434	36.0848	554.434	55.8038	554.434	64.0659	554.434	50.0093
554.916	36.0219	554.916	55.7787	554.916	63.9729	554.916	49.9514
555.398	35.9746	555.398	55.7433	555.398	63.8681	555.398	49.8989
555.881	35.952	555.881	55.7076	555.881	63.765	555.881	49.8628
556.363	35.9521	556.363	55.6655	556.363	63.6905	556.363	49.8341
556.845	35.9814	556.845	55.6495	556.845	63.6509	556.845	49.8387
557.327	36.0346	557.327	55.6677	557.327	63.6537	557.327	49.877
557.809	36.102	557.809	55.7174	557.809	63.6974	557.809	49.9399
558.291	36.1728	558.291	55.7872	558.291	63.7716	558.291	50.0124
558.773	36.2325	558.773	55.8238	558.773	63.8905	558.773	50.0413
559.255	36.2869	559.255	55.8685	559.255	63.972	559.255	50.0849
559.737	36.3403	559.737	55.9147	559.737	64.0549	559.737	50.1204
560.22	36.3899	560.22	55.9404	560.22	64.1238	560.22	50.1427
560.702	36.437	560.702	55.9479	560.702	64.1759	560.702	50.1585
561.184	36.4854	561.184	55.9464	561.184	64.219	561.184	50.1754
561.666	36.5138	561.666	55.9451	561.666	64.2185	561.666	50.2037
562.148	36.5409	562.148	55.9255	562.148	64.2048	562.148	50.2307
562.63	36.5449	562.63	55.8673	562.63	64.1847	562.63	50.2272
563.112	36.5382	563.112	55.7956	563.112	64.1517	563.112	50.2149
563.594	36.528	563.594	55.7169	563.594	64.1124	563.594	50.1971
564.077	36.5218	564.077	55.6402	564.077	64.0737	564.077	50.1781
564.559	36.5241	564.559	55.5744	564.559	64.0413	564.559	50.1611
565.041	36.5342	565.041	55.5256	565.041	64.0185	565.041	50.1455
565.523	36.5467	565.523	55.4953	565.523	64.0049	565.523	50.1271
566.005	36.5545	566.005	55.4808	566.005	63.9983	566.005	50.1005
566.487	36.552	566.487	55.4772	566.487	63.9967	566.487	50.0629
566.969	36.5385	566.969	55.4796	566.969	63.9997	566.969	50.0159
567.451	36.5177	567.451	55.4845	567.451	64.0083	567.451	49.966
567.933	36.4963	567.933	55.4897	567.933	64.0237	567.933	49.9213
568.416	36.4535	568.416	55.4597	568.416	64.0098	568.416	49.8687
568.898	36.4496	568.898	55.4648	568.898	64.0359	568.898	49.8494
569.38	36.4453	569.38	55.443	569.38	64.0687	569.38	49.8142
569.862	36.4619	569.862	55.4569	569.862	64.0743	569.862	49.8184
570.344	36.4866	570.344	55.4815	570.344	64.0638	570.344	49.8288
570.826	36.5113	570.826	55.502	570.826	64.0485	570.826	49.8256
571.308	36.5426	571.308	55.5376	571.308	64.0263	571.308	49.8273
571.79	36.5805	571.79	55.5879	571.79	64.004	571.79	49.838
572.273	36.6235	572.273	55.6467	572.273	63.9862	572.273	49.8587
572.755	36.657	572.755	55.6753	572.755	63.9858	572.755	49.8586
573.237	36.6944	573.237	55.7112	573.237	63.9736	573.237	49.8815
573.719	36.7209	573.719	55.7174	573.719	63.9548	573.719	49.8937
574.201	36.7347	574.201	55.6882	574.201	63.9248	574.201	49.8897
574.683	36.7384	574.683	55.6272	574.683	63.8835	574.683	49.8702
575.165	36.7385	575.165	55.5459	575.165	63.8363	575.165	49.8421
575.647	36.7418	575.647	55.4592	575.647	63.7915	575.647	49.8139
576.13	36.7524	576.13	55.3801	576.13	63.7572	576.13	49.7916
576.612	36.7693	576.612	55.3151	576.612	63.7371	576.612	49.7751
577.094	36.7871	577.094	55.264	577.094	63.7298	577.094	49.7586
577.576	36.7995	577.576	55.2226	577.576	63.7297	577.576	49.7341
578.058	36.8023	578.058	55.1865	578.058	63.7304	578.058	49.6972
578.54	36.7963	578.54	55.1548	578.54	63.7277	578.54	49.6495
579.022	36.7866	579.022	55.1303	579.022	63.7211	579.022	49.5999
579.504	36.7807	579.504	55.1178	579.504	63.7127	579.504	49.56
579.986	36.7845	579.986	55.1201	579.986	63.7054	579.986	49.5395
580.468	36.8002	580.468	55.136	580.468	63.7007	580.468	49.5417
580.951	36.8253	580.951	55.1594	580.951	63.6973	580.951	49.5622
581.433	36.855	581.433	55.182	581.433	63.6927	581.433	49.5914
581.915	36.8847	581.915	55.1964	581.915	63.6848	581.915	49.6192
582.397	36.9123	582.397	55.1995	582.397	63.6734	582.397	49.639
582.879	36.9385	582.879	55.1927	582.879	63.6605	582.879	49.6493
583.361	36.9652	583.361	55.1804	583.361	63.6486	583.361	49.6529
583.843	36.9932	583.843	55.1677	583.843	63.6392	583.843	49.6529
584.325	37.0209	584.325	55.1574	584.325	63.631	584.325	49.6508
584.808	37.0446	584.808	55.15	584.808	63.6205	584.808	49.645
585.29	37.0609	585.29	55.1446	585.29	63.6042	585.29	49.6334
585.772	37.069	585.772	55.1409	585.772	63.5812	585.772	49.6156
586.254	37.0728	586.254	55.1404	586.254	63.5548	586.254	49.5953
586.736	37.0797	586.736	55.146	586.736	63.5313	586.736	49.5799
587.218	37.0969	587.218	55.1583	587.218	63.5171	587.218	49.5778
587.7	37.1306	587.7	55.1784	587.7	63.5175	587.7	49.5948
588.182	37.1808	588.182	55.2029	588.182	63.5321	588.182	49.6305
588.664	37.242	588.664	55.2257	588.664	63.5554	588.664	49.6784
589.147	37.3051	589.147	55.2408	589.147	63.5788	589.147	49.7282
589.629	37.361	589.629	55.2454	589.629	63.594	589.629	49.7695
590.111	37.4029	590.111	55.2403	590.111	63.5962	590.111	49.795
590.593	37.428	590.593	55.2296	590.593	63.5848	590.593	49.8017
591.075	37.4363	591.075	55.2174	591.075	63.5622	591.075	49.7906
591.557	37.4293	591.557	55.2054	591.557	63.5314	591.557	49.7645
592.039	37.4086	592.039	55.1915	592.039	63.4945	592.039	49.727
592.521	37.3763	592.521	55.1716	592.521	63.452	592.521	49.6823
593.004	37.3359	593.004	55.1429	593.004	63.4049	593.004	49.6368
593.486	37.2938	593.486	55.1067	593.486	63.3567	593.486	49.5996
593.968	37.2592	593.968	55.0696	593.968	63.3137	593.968	49.5814
594.45	37.2418	594.45	55.0414	594.45	63.2846	594.45	49.5914
594.932	37.2485	594.932	55.0306	594.932	63.2764	594.932	49.6329
595.414	37.2801	595.414	55.0402	595.414	63.2912	595.414	49.6993
595.896	37.3298	595.896	55.0655	595.896	63.3239	595.896	49.7747
596.378	37.3852	596.378	55.0958	596.378	63.3633	596.378	49.8376
596.861	37.4322	596.861	55.1183	596.861	63.396	596.861	49.8683
597.343	37.4606	597.343	55.1234	597.343	63.4114	597.343	49.8561
597.825	37.4674	597.825	55.1081	597.825	63.4056	597.825	49.8032
598.307	37.4573	598.307	55.0759	598.307	63.3821	598.307	49.7239
598.789	37.4401	598.789	55.0338	598.789	63.3493	598.789	49.6384
599.271	37.4255	599.271	54.989	599.271	63.3156	599.271	49.5651
599.753	37.4198	599.753	54.9454	599.753	63.2859	599.753	49.514
600.235	37.4234	600.235	54.9038	600.235	63.2593	600.235	49.485
600.717	37.4326	600.717	54.8642	600.717	63.2314	600.717	49.4702
601.199	37.4428	601.199	54.8287	601.199	63.1975	601.199	49.46
601.682	37.4519	601.682	54.8026	601.682	63.1569	601.682	49.4478
602.164	37.4616	602.164	54.7933	602.164	63.1136	602.164	49.4329
602.646	37.477	602.646	54.8064	602.646	63.0753	602.646	49.4187
603.128	37.5035	603.128	54.8415	603.128	63.0495	603.128	49.4092
603.61	37.5437	603.61	54.8909	603.61	63.0394	603.61	49.4053
604.092	37.5959	604.092	54.9411	604.092	63.0429	604.092	49.4031
604.574	37.6547	604.574	54.9773	604.574	63.0527	604.574	49.3964
605.057	37.7129	605.057	54.9898	605.057	63.0604	605.057	49.3795
605.539	37.764	605.539	54.977	605.539	63.0595	605.539	49.3507
606.021	37.8044	606.021	54.9455	606.021	63.0485	606.021	49.3135
606.503	37.8335	606.503	54.9061	606.503	63.0303	606.503	49.2741
606.985	37.8528	606.985	54.8682	606.985	63.0095	606.985	49.2386
607.467	37.8645	607.467	54.8357	607.467	62.99	607.467	49.2092
607.949	37.8703	607.949	54.8053	607.949	62.9726	607.949	49.1845
608.431	37.8722	608.431	54.7704	608.431	62.9554	608.431	49.1609
608.913	37.8728	608.913	54.7255	608.913	62.9359	608.913	49.1361
609.395	37.8756	609.395	54.6704	609.395	62.9128	609.395	49.1121
609.878	37.8851	609.878	54.6118	609.878	62.8879	609.878	49.0949
610.36	37.9047	610.36	54.5603	610.36	62.8648	610.36	49.0918
610.842	37.9355	610.842	54.5258	610.842	62.8477	610.842	49.1076
611.324	37.975	611.324	54.5124	611.324	62.8381	611.324	49.1413
611.806	38.0175	611.806	54.5171	611.806	62.8341	611.806	49.1861
612.288	38.0559	612.288	54.5303	612.288	62.8311	612.288	49.2316
612.77	38.0844	612.77	54.541	612.77	62.8243	612.77	49.2689
613.252	38.1002	613.252	54.5408	613.252	62.8108	613.252	49.2935
613.735	38.1039	613.735	54.5269	613.735	62.7919	613.735	49.3073
614.217	38.099	614.217	54.5021	614.217	62.7718	614.217	49.316
614.699	38.0891	614.699	54.472	614.699	62.7559	614.699	49.3254
615.181	38.077	615.181	54.4422	615.181	62.748	615.181	49.3371
615.663	38.0636	615.663	54.4156	615.663	62.7483	615.663	49.3478
616.145	38.0487	616.145	54.3921	616.145	62.7535	616.145	49.3502
616.627	38.0327	616.627	54.3704	616.627	62.7581	616.627	49.3371
617.109	38.0174	617.109	54.3497	617.109	62.7567	617.109	49.3055
617.591	38.0059	617.591	54.3302	617.591	62.7461	617.591	49.2581
618.074	38.0011	618.074	54.313	618.074	62.7255	618.074	49.2029
618.556	38.0046	618.556	54.2991	618.556	62.6963	618.556	49.1498
619.038	38.0157	619.038	54.2877	619.038	62.6605	619.038	49.1058
619.52	38.0314	619.52	54.2774	619.52	62.6202	619.52	49.0739
620.002	38.0488	620.002	54.2671	620.002	62.5769	620.002	49.0523
620.484	38.0658	620.484	54.2579	620.484	62.5325	620.484	49.0373
620.966	38.0825	620.966	54.2533	620.966	62.4893	620.966	49.0253
621.448	38.1007	621.448	54.2587	621.448	62.4508	621.448	49.0145
621.931	38.1224	621.931	54.2788	621.931	62.4205	621.931	49.0052
622.413	38.1482	622.413	54.3155	622.413	62.4011	622.413	48.9979
622.895	38.1767	622.895	54.366	622.895	62.3939	622.895	48.9932
623.377	38.2047	623.377	54.4237	623.377	62.3976	623.377	48.9908
623.859	38.2296	623.859	54.4807	623.859	62.4102	623.859	48.9909
624.341	38.2501	624.341	54.5304	624.341	62.4291	624.341	48.995
624.823	38.268	624.823	54.5701	624.823	62.452	624.823	49.0067
625.305	38.287	625.305	54.6009	625.305	62.4779	625.305	49.0301
625.788	38.311	625.788	54.6259	625.788	62.5055	625.788	49.068
626.27	38.3417	626.27	54.6476	626.27	62.5337	626.27	49.1188
626.752	38.3775	626.752	54.6662	626.752	62.5607	626.752	49.1759
627.234	38.4139	627.234	54.6787	627.234	62.5849	627.234	49.2289
627.716	38.4457	627.716	54.6811	627.716	62.6055	627.716	49.2672
628.198	38.4693	628.198	54.6703	628.198	62.6235	628.198	49.2837
628.68	38.484	628.68	54.6461	628.68	62.6415	628.68	49.2774
629.162	38.4922	629.162	54.6111	629.162	62.6624	629.162	49.2538
629.644	38.4978	629.644	54.5695	629.644	62.6876	629.644	49.2219
630.126	38.5039	630.126	54.5251	630.126	62.7157	630.126	49.1908
630.609	38.5114	630.609	54.4802	630.609	62.7423	630.609	49.1656
631.091	38.5193	631.091	54.4357	631.091	62.7613	631.091	49.1469
631.573	38.526	631.573	54.3926	631.573	62.768	631.573	49.1315
632.055	38.5312	632.055	54.3537	632.055	62.7606	632.055	49.1155
632.537	38.5369	632.537	54.3236	632.537	62.7417	632.537	49.0971
633.019	38.5469	633.019	54.3075	633.019	62.7173	633.019	49.0779
633.501	38.5648	633.501	54.3079	633.501	62.6937	633.501	49.0623
633.984	38.5917	633.984	54.3223	633.984	62.6751	633.984	49.0559
634.466	38.6247	634.466	54.3426	634.466	62.6616	634.466	49.0628
634.948	38.6577	634.948	54.3573	634.948	62.6498	634.948	49.085
635.43	38.6836	635.43	54.3558	635.43	62.6345	635.43	49.1219
635.912	38.6978	635.912	54.333	635.912	62.612	635.912	49.1709
636.394	38.7002	636.394	54.2914	636.394	62.582	636.394	49.2282
636.876	38.6954	636.876	54.24	636.876	62.5476	636.876	49.2883
637.358	38.6908	637.358	54.1905	637.358	62.5135	637.358	49.3439
637.84	38.6933	637.84	54.1521	637.84	62.4839	637.84	49.3859
638.322	38.7065	638.322	54.1281	638.322	62.4604	638.322	49.4047
638.805	38.7296	638.805	54.1151	638.805	62.4416	638.805	49.3929
639.287	38.7587	639.287	54.1065	639.287	62.4246	639.287	49.3485
639.769	38.7886	639.769	54.0958	639.769	62.4067	639.769	49.2764
640.251	38.816	640.251	54.0809	640.251	62.3871	640.251	49.1881
640.733	38.8394	640.733	54.0641	640.733	62.3662	640.733	49.098
641.215	38.8595	641.215	54.0498	641.215	62.3445	641.215	49.0183
641.697	38.8767	641.697	54.0409	641.697	62.3208	641.697	48.9544
642.179	38.8897	642.179	54.0352	642.179	62.291	642.179	48.9034
642.662	38.8953	642.662	54.0256	642.662	62.249	642.662	48.8563
643.144	38.8893	643.144	54.0023	643.144	62.19	643.144	48.8032
643.626	38.8691	643.626	53.958	643.626	62.1125	643.626	48.7384
644.108	38.8358	644.108	53.8916	644.108	62.0207	644.108	48.664
644.59	38.7948	644.59	53.8096	644.59	61.9238	644.59	48.5889
645.072	38.7547	645.072	53.7233	645.072	61.833	645.072	48.5247
645.554	38.7241	645.554	53.645	645.554	61.7579	645.554	48.4801
646.036	38.7096	646.036	53.5821	646.036	61.7038	646.036	48.4571
646.519	38.7136	646.519	53.5363	646.519	61.6708	646.519	48.4508
647.001	38.7347	647.001	53.5031	647.001	61.6554	647.001	48.4517
647.483	38.7695	647.483	53.4764	647.483	61.6531	647.483	48.4511
647.965	38.8139	647.965	53.4519	647.965	61.6606	647.965	48.4445
648.447	38.8645	648.447	53.4295	648.447	61.6762	648.447	48.4333
648.929	38.919	648.929	53.4125	648.929	61.6991	648.929	48.4226
649.411	38.9749	649.411	53.4055	649.411	61.7272	649.411	48.4175
649.893	39.0285	649.893	53.4103	649.893	61.7561	649.893	48.4196
650.375	39.0754	650.375	53.4244	650.375	61.7793	650.375	48.4263
650.857	39.1109	650.857	53.4417	650.857	61.7901	650.857	48.432
651.34	39.1319	651.34	53.4547	651.34	61.7843	651.34	48.4312
651.822	39.1382	651.822	53.4581	651.822	61.7618	651.822	48.4215
652.304	39.133	652.304	53.4501	652.304	61.726	652.304	48.4039
652.786	39.1218	652.786	53.4323	652.786	61.682	652.786	48.381
653.268	39.1102	653.268	53.4081	653.268	61.6339	653.268	48.3549
653.75	39.1026	653.75	53.3797	653.75	61.5834	653.75	48.3255
654.232	39.1005	654.232	53.3475	654.232	61.5294	654.232	48.2904
654.715	39.1035	654.715	53.3102	654.715	61.4707	654.715	48.2478
655.197	39.1104	655.197	53.2669	655.197	61.4082	655.197	48.1983
655.679	39.1206	655.679	53.2187	655.679	61.3459	655.679	48.1472
656.161	39.1346	656.161	53.1695	656.161	61.2907	656.161	48.1022
656.643	39.1534	656.643	53.1247	656.643	61.2485	656.643	48.0699
657.125	39.1777	657.125	53.0883	657.125	61.2218	657.125	48.0524
657.607	39.2065	657.607	53.0609	657.607	61.207	657.607	48.0449
658.089	39.2371	658.089	53.0393	658.089	61.1958	658.089	48.0379
658.571	39.2662	658.571	53.0175	658.571	61.1786	658.571	48.0207
659.053	39.291	659.053	52.9898	659.053	61.1482	659.053	47.9872
659.536	39.3105	659.536	52.9531	659.536	61.1033	659.536	47.938
660.018	39.3257	660.018	52.9083	660.018	61.0483	660.018	47.8807
660.5	39.3385	660.5	52.8588	660.5	60.9908	660.5	47.8253
660.982	39.3503	660.982	52.8086	660.982	60.9374	660.982	47.7792
661.464	39.361	661.464	52.7599	661.464	60.8906	661.464	47.7438
661.946	39.3689	661.946	52.712	661.946	60.8484	661.946	47.7146
662.428	39.3721	662.428	52.6627	662.428	60.8059	662.428	47.6842
662.91	39.3701	662.91	52.6105	662.91	60.7595	662.91	47.6476
663.393	39.3647	663.393	52.556	663.393	60.7093	663.393	47.6051
663.875	39.3598	663.875	52.5029	663.875	60.6597	663.875	47.5626
664.357	39.3599	664.357	52.4564	664.357	60.6168	664.357	47.528
664.839	39.3681	664.839	52.4205	664.839	60.5854	664.839	47.5074
665.321	39.3848	665.321	52.3961	665.321	60.566	665.321	47.5014
665.803	39.4076	665.803	52.3798	665.803	60.5531	665.803	47.5045
666.285	39.4317	666.285	52.3633	666.285	60.5357	666.285	47.5052
666.767	39.4511	666.767	52.3363	666.767	60.5001	666.767	47.4887
667.25	39.4623	667.25	52.2913	667.25	60.4368	667.25	47.4426
667.732	39.4675	667.732	52.2317	667.732	60.3507	667.732	47.3662
668.214	39.477	668.214	52.1748	668.214	60.2655	668.214	47.2772
668.696	39.5016	668.696	52.1399	668.696	60.2076	668.696	47.2021
669.178	39.5394	669.178	52.1268	669.178	60.1817	669.178	47.1554
669.66	39.5763	669.66	52.1167	669.66	60.17	669.66	47.1317
670.142	39.5995	670.142	52.0942	670.142	60.1527	670.142	47.116
670.624	39.6045	670.624	52.0561	670.624	60.1205	670.624	47.0956
671.106	39.5934	671.106	52.0072	671.106	60.0733	671.106	47.0648
671.589	39.5721	671.589	51.9545	671.589	60.0166	671.589	47.0245
672.071	39.5487	672.071	51.9046	672.071	59.9581	672.071	46.9802
672.553	39.5318	672.553	51.8619	672.553	59.906	672.553	46.9391
673.035	39.5281	673.035	51.8276	673.035	59.8655	673.035	46.906
673.517	39.5413	673.517	51.8003	673.517	59.8378	673.517	46.882
673.999	39.5704	673.999	51.7763	673.999	59.8192	673.999	46.8639
674.481	39.6114	674.481	51.7519	674.481	59.8033	674.481	46.8473
674.963	39.659	674.963	51.7245	674.963	59.7844	674.963	46.8294
675.446	39.7086	675.446	51.6932	675.446	59.759	675.446	46.8108
675.928	39.7571	675.928	51.658	675.928	59.7268	675.928	46.7952
676.41	39.8024	676.41	51.6182	676.41	59.6892	676.41	46.7863
676.892	39.8429	676.892	51.5718	676.892	59.6476	676.892	46.7844
677.374	39.8758	677.374	51.5162	677.374	59.6017	677.374	46.7855
677.856	39.8985	677.856	51.4496	677.856	59.5497	677.856	46.7821
678.338	39.9086	678.338	51.3735	678.338	59.49	678.338	46.7663
678.82	39.9058	678.82	51.2931	678.82	59.4225	678.82	46.7336
679.302	39.8927	679.302	51.217	679.302	59.35	679.302	46.685
679.784	39.8745	679.784	51.1542	679.784	59.2776	679.784	46.6257
680.267	39.8575	680.267	51.1104	680.267	59.2107	680.267	46.5633
680.749	39.8474	680.749	51.0861	680.749	59.1529	680.749	46.5037
681.231	39.8472	681.231	51.0753	681.231	59.1047	681.231	46.4489
681.713	39.8566	681.713	51.0686	681.713	59.0635	681.713	46.3969
682.195	39.8725	682.195	51.0558	682.195	59.0254	682.195	46.3437
682.677	39.8907	682.677	51.03	682.677	58.9871	682.677	46.2862
683.159	39.9071	683.159	50.9889	683.159	58.9469	683.159	46.2238
683.641	39.9191	683.641	50.9345	683.641	58.9052	683.641	46.159
684.124	39.9263	684.124	50.8716	684.124	58.8631	684.124	46.0953
684.606	39.9293	684.606	50.8055	684.606	58.8215	684.606	46.0356
685.088	39.9301	685.088	50.7408	685.088	58.7801	685.088	45.9806
685.57	39.9304	685.57	50.6802	685.57	58.7377	685.57	45.929
686.052	39.932	686.052	50.6256	686.052	58.6933	686.052	45.8788
686.534	39.9365	686.534	50.5782	686.534	58.6464	686.534	45.8288
687.016	39.9451	687.016	50.5383	687.016	58.5975	687.016	45.7796
687.498	39.9585	687.498	50.5049	687.498	58.5472	687.498	45.7323
687.981	39.977	687.981	50.4754	687.981	58.4959	687.981	45.6882
688.463	39.9999	688.463	50.4455	688.463	58.4428	688.463	45.6468
688.945	40.0258	688.945	50.4113	688.945	58.3873	688.945	45.6065
689.427	40.053	689.427	50.3704	689.427	58.3292	689.427	45.5652
689.909	40.0805	689.909	50.3237	689.909	58.2707	689.909	45.5224
690.391	40.1074	690.391	50.2746	690.391	58.2158	690.391	45.4799
690.873	40.1336	690.873	50.2276	690.873	58.1688	690.873	45.4411
691.355	40.1588	691.355	50.1856	691.355	58.1325	691.355	45.4091
691.837	40.1822	691.837	50.1478	691.837	58.1057	691.837	45.3844
692.32	40.2026	692.32	50.1096	692.32	58.083	692.32	45.3636
692.802	40.2183	692.802	50.0645	692.802	58.0561	692.802	45.3403
693.284	40.2284	693.284	50.008	693.284	58.0174	693.284	45.3075
693.766	40.2334	693.766	49.9395	693.766	57.9626	693.766	45.261
694.248	40.2355	694.248	49.8639	694.248	57.8925	694.248	45.2012
694.73	40.238	694.73	49.7896	694.73	57.8123	694.73	45.1327
695.212	40.2441	695.212	49.7242	695.212	57.7282	695.212	45.0624
695.694	40.2554	695.694	49.6713	695.694	57.6447	695.694	44.9957
696.177	40.2709	696.177	49.6278	696.177	57.5616	696.177	44.934
696.659	40.2872	696.659	49.5857	696.659	57.4753	696.659	44.875
697.141	40.2996	697.141	49.5352	697.141	57.3803	697.141	44.8137
697.623	40.3041	697.623	49.4699	697.623	57.274	697.623	44.7467
698.105	40.2991	698.105	49.3895	698.105	57.1588	698.105	44.6742
698.587	40.2867	698.587	49.3004	698.587	57.0423	698.587	44.6008
699.069	40.2717	699.069	49.2125	699.069	56.9348	699.069	44.5332
699.551	40.261	699.551	49.1351	699.551	56.8451	699.551	44.4773
700.033	40.2606	700.033	49.0729	700.033	56.7772	700.033	44.4348
700.516	40.2745	700.516	49.0243	700.516	56.7285	700.516	44.4021
700.998	40.3031	700.998	48.983	700.998	56.6915	700.998	44.3719
701.48	40.3432	701.48	48.9412	701.48	56.6573	701.48	44.3366
701.962	40.3892	701.962	48.8928	701.962	56.6193	701.962	44.2915
702.444	40.4346	702.444	48.8362	702.444	56.5754	702.444	44.2365
702.926	40.4737	702.926	48.7734	702.926	56.5277	702.926	44.1756
703.408	40.5026	703.408	48.7094	703.408	56.4802	703.408	44.1148
703.89	40.5204	703.89	48.649	703.89	56.4358	703.89	44.059
704.372	40.5288	704.372	48.5953	704.372	56.3951	704.372	44.0103
704.855	40.5319	704.855	48.5495	704.855	56.3556	704.855	43.9676
705.337	40.5343	705.337	48.511	705.337	56.3138	705.337	43.928
705.819	40.54	705.819	48.4781	705.819	56.2665	705.819	43.8883
706.301	40.5511	706.301	48.4485	706.301	56.2127	706.301	43.8463
706.783	40.567	706.783	48.4186	706.783	56.1525	706.783	43.8004
707.265	40.585	707.265	48.3837	707.265	56.0869	707.265	43.7497
707.747	40.601	707.747	48.3387	707.747	56.0158	707.747	43.693
708.229	40.6116	708.229	48.2796	708.229	55.9381	708.229	43.6296
708.712	40.6156	708.712	48.2054	708.712	55.8525	708.712	43.5596
709.194	40.6144	709.194	48.1193	709.194	55.7587	709.194	43.4852
709.676	40.6118	709.676	48.0282	709.676	55.6586	709.676	43.4108
710.158	40.6123	710.158	47.9404	710.158	55.5564	710.158	43.3416
710.64	40.6196	710.64	47.8621	710.64	55.4569	710.64	43.2815
711.122	40.6352	711.122	47.7953	711.122	55.3638	711.122	43.231
711.604	40.6577	711.604	47.7365	711.604	55.2781	711.604	43.1865
712.086	40.6842	712.086	47.6791	712.086	55.1979	712.086	43.1418
712.568	40.7114	712.568	47.617	712.568	55.1206	712.568	43.0911
713.051	40.7371	713.051	47.5481	713.051	55.0444	713.051	43.0315
713.533	40.7609	713.533	47.4757	713.533	54.97	713.533	42.9648
714.015	40.7835	714.015	47.4069	714.015	54.9006	714.015	42.8966
714.497	40.8057	714.497	47.3487	714.497	54.8394	714.497	42.8329
714.979	40.8269	714.979	47.3034	714.979	54.7873	714.979	42.7769
715.461	40.8454	715.461	47.2668	715.461	54.7408	715.461	42.7272
715.943	40.8582	715.943	47.2285	715.943	54.6924	715.943	42.6779
716.425	40.8631	716.425	47.1767	716.425	54.6331	716.425	42.6219
716.908	40.8597	716.908	47.1029	716.908	54.5562	716.908	42.5545
717.39	40.8505	717.39	47.0058	717.39	54.46	717.39	42.4762
717.872	40.8396	717.872	46.8916	717.872	54.3483	717.872	42.3923
718.354	40.8323	718.354	46.7717	718.354	54.229	718.354	42.3105
718.836	40.8322	718.836	46.6579	718.836	54.1106	718.836	42.237
719.318	40.841	719.318	46.5578	719.318	53.9989	719.318	42.1732
719.8	40.8576	719.8	46.4731	719.8	53.8947	719.8	42.1151
720.282	40.8792	720.282	46.4	720.282	53.795	720.282	42.0553
720.764	40.9029	720.764	46.3322	720.764	53.695	720.764	41.987
721.247	40.9267	721.247	46.2647	721.247	53.5916	721.247	41.9072
721.729	40.9502	721.729	46.1952	721.729	53.4848	721.729	41.8177
722.211	40.9733	722.211	46.1236	722.211	53.3772	722.211	41.7232
722.693	40.9961	722.693	46.0504	722.693	53.2724	722.693	41.6281
723.175	41.0172	723.175	45.9741	723.175	53.172	723.175	41.5341
723.657	41.0341	723.657	45.8913	723.657	53.0749	723.657	41.4391
724.139	41.0442	724.139	45.7978	724.139	52.9774	724.139	41.3392
724.621	41.0457	724.621	45.6912	724.621	52.8757	724.621	41.2317
725.104	41.0394	725.104	45.5729	725.104	52.7672	725.104	41.1175
725.586	41.0281	725.586	45.4484	725.586	52.6526	725.586	41.0014
726.068	41.0162	726.068	45.3249	726.068	52.5343	726.068	40.8903
726.55	41.0079	726.55	45.2082	726.55	52.4151	726.55	40.7896
727.032	41.0061	727.032	45.1001	727.032	52.2962	727.032	40.7007
727.514	41.0114	727.514	44.998	727.514	52.1767	727.514	40.6199
727.996	41.023	727.996	44.8964	727.996	52.0541	727.996	40.5413
728.478	41.0392	728.478	44.7905	728.478	51.9266	728.478	40.459
728.96	41.0589	728.96	44.6788	728.96	51.7944	728.96	40.371
729.443	41.0814	729.443	44.5635	729.443	51.6604	729.443	40.2796
729.925	41.1065	729.925	44.4495	729.925	51.5285	729.925	40.1893
730.407	41.1329	730.407	44.3405	730.407	51.4015	730.407	40.1037
730.889	41.1584	730.889	44.2371	730.889	51.279	730.889	40.0229
731.371	41.1797	731.371	44.1358	731.371	51.1573	731.371	39.9418
731.853	41.1932	731.853	44.0308	731.853	51.0307	731.853	39.8533
732.335	41.197	732.335	43.9168	732.335	50.8945	732.335	39.7512
732.817	41.1917	732.817	43.7921	732.817	50.7474	732.817	39.6342
733.299	41.1809	733.299	43.6593	733.299	50.5923	733.299	39.5065
733.782	41.1704	733.782	43.5237	733.782	50.4349	733.782	39.3769
734.264	41.1664	734.264	43.3906	734.264	50.2812	734.264	39.2544
734.746	41.1732	734.746	43.2627	734.746	50.1346	734.746	39.1448
735.228	41.1927	735.228	43.1393	735.228	49.9948	735.228	39.0484
735.71	41.2233	735.71	43.0178	735.71	49.8592	735.71	38.9607
736.192	41.2613	736.192	42.8964	736.192	49.7244	736.192	38.8755
736.674	41.3018	736.674	42.7756	736.674	49.5886	736.674	38.7876
737.156	41.3401	737.156	42.6587	737.156	49.4526	737.156	38.6949
737.639	41.3725	737.639	42.5502	737.639	49.3181	737.639	38.5983
738.121	41.3965	738.121	42.4519	738.121	49.1861	738.121	38.4997
738.603	41.4106	738.603	42.3617	738.603	49.0547	738.603	38.3999
739.085	41.4145	739.085	42.2728	739.085	48.9195	739.085	38.2978
739.567	41.4091	739.567	42.1765	739.567	48.7754	739.567	38.1911
740.049	41.3969	740.049	42.0663	740.049	48.6191	740.049	38.0783
740.531	41.3814	740.531	41.94	740.531	48.452	740.531	37.9605
741.013	41.3672	741.013	41.8016	741.013	48.28	741.013	37.842
741.495	41.3587	741.495	41.6583	741.495	48.1112	741.495	37.728
741.978	41.3594	741.978	41.5173	741.978	47.9528	741.978	37.6226
742.46	41.3709	742.46	41.3827	742.46	47.8076	742.46	37.5262
742.942	41.3924	742.942	41.2537	742.942	47.6725	742.942	37.4355
743.424	41.4218	743.424	41.1261	743.424	47.5407	743.424	37.3446
743.906	41.4557	743.906	40.9952	743.906	47.4047	743.906	37.2487
744.388	41.4912	744.388	40.8586	744.388	47.2599	744.388	37.1456
744.87	41.5253	744.87	40.7176	744.87	47.1059	744.87	37.0369
745.352	41.5562	745.352	40.5756	745.352	46.9464	745.352	36.9263
745.835	41.5819	745.835	40.4358	745.835	46.7861	745.835	36.8165
746.317	41.6013	746.317	40.2991	746.317	46.6283	746.317	36.7073
746.799	41.6135	746.799	40.1632	746.799	46.4728	746.799	36.5953
747.281	41.6186	747.281	40.0241	747.281	46.3171	747.281	36.4753
747.763	41.618	747.763	39.8788	747.763	46.1578	747.763	36.3433
748.245	41.6142	748.245	39.7278	748.245	45.9935	748.245	36.1994
748.727	41.611	748.727	39.5747	748.727	45.8256	748.727	36.0472
749.209	41.6114	749.209	39.4248	749.209	45.6571	749.209	35.893
749.692	41.6175	749.692	39.2816	749.692	45.4911	749.692	35.742
750.174	41.6295	750.174	39.1442	750.174	45.3281	750.174	35.596
750.656	41.6457	750.656	39.0076	750.656	45.1655	750.656	35.4531
751.138	41.6632	751.138	38.864	751.138	44.999	751.138	35.3089
751.62	41.679	751.62	38.707	751.62	44.8244	751.62	35.1601
752.102	41.6909	752.102	38.5344	752.102	44.6399	752.102	35.0059
752.584	41.6977	752.584	38.3488	752.584	44.4468	752.584	34.8489
753.066	41.699	753.066	38.1559	753.066	44.2478	753.066	34.693
753.548	41.6949	753.548	37.9614	753.548	44.0448	753.548	34.5399
754.03	41.6854	754.03	37.7679	754.03	43.8369	754.03	34.388
754.513	41.6708	754.513	37.5742	754.513	43.6205	754.513	34.2316
754.995	41.6521	754.995	37.3767	754.995	43.3912	754.995	34.064
755.477	41.6314	755.477	37.1723	755.477	43.1465	755.477	33.8812
755.959	41.612	755.959	36.9615	755.959	42.8884	755.959	33.6844
756.441	41.5978	756.441	36.7485	756.441	42.6232	756.441	33.4799
756.923	41.5926	756.923	36.5397	756.923	42.3594	756.923	33.2766
757.405	41.5986	757.405	36.3404	757.405	42.1037	757.405	33.0816
757.888	41.6158	757.888	36.1518	757.888	41.8585	757.888	32.8964
758.37	41.6421	758.37	35.9706	758.37	41.6205	758.37	32.7167
758.852	41.6744	758.852	35.7906	758.852	41.383	758.852	32.5347
759.334	41.7097	759.334	35.606	759.334	41.1396	759.334	32.3429
759.816	41.746	759.816	35.4141	759.816	40.8873	759.816	32.1386
760.298	41.7823	760.298	35.2159	760.298	40.6281	760.298	31.9247
760.78	41.8188	760.78	35.0151	760.78	40.3677	760.78	31.7082
761.262	41.8552	761.262	34.8146	761.262	40.1114	761.262	31.4963
761.744	41.8904	761.744	34.6134	761.744	39.8613	761.744	31.2922
762.226	41.9216	762.226	34.4067	762.226	39.6145	762.226	31.0942
762.709	41.946	762.709	34.1877	762.709	39.3646	762.709	30.8965
763.191	41.9609	763.191	33.9513	763.191	39.1052	763.191	30.6931
763.673	41.9654	763.673	33.697	763.673	38.8328	763.673	30.481
764.155	41.9607	764.155	33.4293	764.155	38.5488	764.155	30.2617
764.637	41.9499	764.637	33.1556	764.637	38.258	764.637	30.0396
765.119	41.9368	765.119	32.8828	765.119	37.966	765.119	29.8192
765.601	41.9256	765.601	32.6144	765.601	37.6757	765.601	29.6014
766.083	41.9192	766.083	32.3489	766.083	37.3861	766.083	29.383
766.566	41.9196	766.566	32.0822	766.566	37.0937	766.566	29.1579
767.048	41.9273	767.048	31.8106	767.048	36.7946	767.048	28.9208
767.53	41.942	767.53	31.5334	767.53	36.4874	767.53	28.6698
768.012	41.9624	768.012	31.2534	768.012	36.1744	768.012	28.4079
768.494	41.9863	768.494	30.9748	768.494	35.8593	768.494	28.1411
768.976	42.0112	768.976	30.7001	768.976	35.5451	768.976	27.8748
769.458	42.0339	769.458	30.4275	769.458	35.2312	769.458	27.6112
769.94	42.0522	769.94	30.1513	769.94	34.913	769.94	27.3474
770.423	42.0649	770.423	29.8641	770.423	34.584	770.423	27.0777
770.905	42.0727	770.905	29.5614	770.905	34.239	770.905	26.7963
771.387	42.0782	771.387	29.2436	771.387	33.8779	771.387	26.5009
771.869	42.0847	771.869	28.9169	771.869	33.5055	771.869	26.1937
772.351	42.0953	772.351	28.5899	772.351	33.1297	772.351	25.8798
772.833	42.1119	772.833	28.2693	772.833	32.758	772.833	25.5642
773.315	42.1342	773.315	27.9567	773.315	32.3938	773.315	25.2493
773.797	42.1606	773.797	27.6478	773.797	32.0349	773.797	24.9341
774.279	42.1885	774.279	27.3358	774.279	31.6759	774.279	24.6158
774.761	42.2161	774.761	27.0154	774.761	31.3112	774.761	24.2933
775.244	42.2422	775.244	26.6866	775.244	30.9382	775.244	23.9696
775.726	42.2667	775.726	26.3551	775.726	30.5587	775.726	23.6511
776.208	42.2895	776.208	26.0296	776.208	30.1768	776.208	23.3452
776.69	42.31	776.69	25.7172	776.69	29.7958	776.69	23.0565
777.172	42.3264	777.172	25.4199	777.172	29.4148	777.172	22.783
777.654	42.3366	777.654	25.1337	777.654	29.0288	777.654	22.5175
778.136	42.3384	778.136	24.8518	778.136	28.6305	778.136	22.2498
778.619	42.3314	778.619	24.5688	778.619	28.215	778.619	21.9732
779.101	42.317	779.101	24.2847	779.101	27.7826	779.101	21.6879
779.583	42.2986	779.583	24.0054	779.583	27.3398	779.583	21.4018
780.065	42.2806	780.065	23.74	780.065	26.897	780.065	21.1281
780.547	42.2673	780.547	23.4963	780.547	26.4639	780.547	20.8792
781.029	42.2623	781.029	23.2768	781.029	26.0463	781.029	20.6627
781.511	42.2672	781.511	23.0786	781.511	25.6453	781.511	20.4792
781.993	42.2828	781.993	22.8963	781.993	25.2597	781.993	20.325
782.475	42.3087	782.475	22.7272	782.475	24.8905	782.475	20.1969
782.957	42.3437	782.957	22.5753	782.957	24.5449	782.957	20.0961
783.44	42.3858	783.44	22.4512	783.44	24.2368	783.44	20.0302
783.922	42.4316	783.922	22.3689	783.922	23.9835	783.922	20.0104
784.404	42.4765	784.404	22.3399	784.404	23.8005	784.404	20.0476
784.886	42.5153	784.886	22.3686	784.886	23.6966	784.886	20.1472
785.368	42.5434	785.368	22.4515	785.368	23.6716	785.368	20.3081
785.85	42.5584	785.85	22.5802	785.85	23.7192	785.85	20.5241
786.332	42.5611	786.332	22.7478	786.332	23.8315	786.332	20.7884
786.814	42.5554	786.814	22.9524	786.814	24.0032	786.814	21.0973
787.297	42.5476	787.297	23.1992	787.297	24.2334	787.297	21.4511
787.779	42.5436	787.779	23.4962	787.779	24.5238	787.779	21.8519
788.261	42.5476	788.261	23.849	788.261	24.8742	788.261	22.3002
788.743	42.5603	788.743	24.2554	788.743	25.2789	788.743	22.7906
789.225	42.5799	789.225	24.7045	789.225	25.727	789.225	23.3127
789.707	42.6025	789.707	25.18	789.707	26.2039	789.707	23.8531
790.189	42.6246	790.189	25.6661	790.189	26.6969	790.189	24.4002
790.671	42.6439	790.671	26.1524	790.671	27.1982	790.671	24.9476
791.154	42.66	791.154	26.6368	791.154	27.7057	791.154	25.4946
791.636	42.6734	791.636	27.1225	791.636	28.2202	791.636	26.0437
792.118	42.6845	792.118	27.6141	792.118	28.7418	792.118	26.5964
792.6	42.693	792.6	28.1126	792.6	29.2664	792.6	27.1499
793.082	42.6983	793.082	28.6136	793.082	29.7856	793.082	27.697
793.564	42.6994	793.564	29.1092	793.564	30.2899	793.564	28.2287
794.046	42.6971	794.046	29.5922	794.046	30.7727	794.046	28.739
794.528	42.6935	794.528	30.0597	794.528	31.2341	794.528	29.2273
795.01	42.692	795.01	30.5149	795.01	31.6801	795.01	29.6995
795.493	42.6959	795.493	30.9655	795.493	32.1197	795.493	30.1647
795.975	42.7068	795.975	31.4195	795.975	32.5604	795.975	30.6311
796.457	42.7242	796.457	31.8821	796.457	33.0042	796.457	31.1023
796.939	42.7454	796.939	32.3537	796.939	33.4479	796.939	31.5764
797.421	42.7669	797.421	32.8317	797.421	33.8855	797.421	32.0489
797.903	42.7868	797.903	33.3129	797.903	34.313	797.903	32.5159
798.385	42.8052	798.385	33.7967	798.385	34.732	798.385	32.9777
798.867	42.8244	798.867	34.2854	798.867	35.1499	798.867	33.4395
799.35	42.8474	799.35	34.7825	799.35	35.5767	799.35	33.9084
799.832	42.8761	799.832	35.2896	799.832	36.0207	799.832	34.3901
800.314	42.9098	800.314	35.8047	800.314	36.4839	800.314	34.8853
800.796	42.9445	800.796	36.322	800.796	36.9621	800.796	35.3897
801.278	42.9749	801.278	36.8351	801.278	37.4469	801.278	35.8957
801.76	42.9962	801.76	37.3401	801.76	37.9301	801.76	36.3969
802.242	43.006	802.242	37.8385	802.242	38.4082	802.242	36.8908
802.724	43.0058	802.724	38.3364	802.724	38.8828	802.724	37.3795
803.206	42.9994	803.206	38.8419	803.206	39.359	803.206	37.8678
803.688	42.9919	803.688	39.3601	803.688	39.8412	803.688	38.3593
804.171	42.9875	804.171	39.8902	804.171	40.3297	804.171	38.8536
804.653	42.9875	804.653	40.4246	804.653	40.8196	804.653	39.3455
805.135	42.9909	805.135	40.952	805.135	41.3027	805.135	39.8272
805.617	42.9946	805.617	41.462	805.617	41.7715	805.617	40.2918
806.099	42.9957	806.099	41.9488	806.099	42.2224	806.099	40.7366
806.581	42.9927	806.581	42.4131	806.581	42.6572	806.581	41.1638
807.063	42.9859	807.063	42.8608	807.063	43.0812	807.063	41.5794
807.545	42.977	807.545	43.2999	807.545	43.5007	807.545	41.99
808.028	42.9688	808.028	43.7365	808.028	43.9192	808.028	42.3994
808.51	42.9635	808.51	44.1734	808.51	44.3367	808.51	42.808
808.992	42.9628	808.992	44.6095	808.992	44.7503	808.992	43.2133
809.474	42.9679	809.474	45.0425	809.474	45.1571	809.474	43.6126
809.956	42.979	809.956	45.4703	809.956	45.5559	809.956	44.0048
810.438	42.9962	810.438	45.892	810.438	45.9479	810.438	44.3911
810.92	43.0189	810.92	46.3074	810.92	46.3357	810.92	44.7736
811.402	43.0457	811.402	46.7161	811.402	46.7211	811.402	45.1538
811.885	43.0743	811.885	47.1163	811.885	47.1035	811.885	45.5305
812.367	43.1022	812.367	47.5051	812.367	47.48	812.367	45.9005
812.849	43.1268	812.849	47.8802	812.849	47.8474	812.849	46.2602
813.331	43.1472	813.331	48.2417	813.331	48.2048	813.331	46.6081
813.813	43.1641	813.813	48.5929	813.813	48.5551	813.813	46.9466
814.295	43.1793	814.295	48.9398	814.295	48.9042	814.295	47.2808
814.777	43.1952	814.777	49.2881	814.777	49.2588	814.777	47.6167
815.259	43.2133	815.259	49.6412	815.259	49.6224	815.259	47.9575
815.741	43.2333	815.741	49.9985	815.741	49.9935	815.741	48.3018
816.224	43.2532	816.224	50.3551	816.224	50.365	816.224	48.6439
816.706	43.2701	816.706	50.7048	816.706	50.7268	816.706	48.9764
817.188	43.2816	817.188	51.0424	817.188	51.07	817.188	49.2935
817.67	43.2867	817.67	51.3666	817.67	51.3896	817.67	49.5942
818.152	43.2862	818.152	51.6804	818.152	51.6865	818.152	49.8819
818.634	43.282	818.634	51.9896	818.634	51.9667	818.634	50.1626
819.116	43.2759	819.116	52.3007	819.116	52.239	819.116	50.4407
819.598	43.2685	819.598	52.6187	819.598	52.5121	819.598	50.716
820.081	43.2591	820.081	52.9457	820.081	52.7928	820.081	50.9831
820.563	43.2467	820.563	53.2813	820.563	53.0855	820.563	51.2338
821.045	43.2305	821.045	53.6234	821.045	53.3924	821.045	51.4615
821.527	43.2122	821.527	53.968	821.527	53.7136	821.527	51.6654
822.009	43.1951	822.009	54.3099	822.009	54.0462	822.009	51.8524
822.491	43.1843	822.491	54.6414	822.491	54.3841	822.491	52.0357
822.973	43.1843	822.973	54.9528	822.973	54.7174	822.973	52.2309
823.455	43.1978	823.455	55.2339	823.455	55.0336	823.455	52.4505
823.937	43.2242	823.937	55.4769	823.937	55.321	823.937	52.7
824.42	43.2604	824.42	55.6797	824.42	55.5729	824.42	52.9764
824.902	43.3018	824.902	55.8484	824.902	55.79	824.902	53.2705
825.384	43.3442	825.384	55.9962	825.384	55.982	825.384	53.5704
825.866	43.3851	825.866	56.141	825.866	56.1642	825.866	53.8652
826.348	43.4242	826.348	56.2995	826.348	56.353	826.348	54.1479
826.83	43.4624	826.83	56.4822	826.83	56.5598	826.83	54.4154
827.312	43.5006	827.312	56.6906	827.312	56.7875	827.312	54.6677
827.794	43.5387	827.794	56.917	827.794	57.0303	827.794	54.9057
828.277	43.575	828.277	57.1486	828.277	57.2766	828.277	55.1298
828.759	43.6069	828.759	57.3723	828.759	57.5141	828.759	55.3403
829.241	43.6318	829.241	57.579	829.241	57.7353	829.241	55.537
829.723	43.6483	829.723	57.7663	829.723	57.939	829.723	55.7208
830.205	43.6569	830.205	57.9371	830.205	58.1304	830.205	55.8937
830.687	43.6599	830.687	58.0973	830.687	58.3176	830.687	56.0589
831.169	43.6603	831.169	58.2529	831.169	58.5078	831.169	56.2193
831.651	43.6609	831.651	58.4075	831.651	58.7048	831.651	56.3774
832.133	43.6637	832.133	58.5628	832.133	58.9083	832.133	56.534
832.615	43.6694	832.615	58.7191	832.615	59.1151	832.615	56.6891
833.098	43.6782	833.098	58.877	833.098	59.3216	833.098	56.8424
833.58	43.6899	833.58	59.0376	833.58	59.5251	833.58	56.9941
834.062	43.7044	834.062	59.2013	834.062	59.7243	834.062	57.145
834.544	43.722	834.544	59.3676	834.544	59.9186	834.544	57.2965
835.026	43.7427	835.026	59.5335	835.026	60.1071	835.026	57.45
835.508	43.7662	835.508	59.6941	835.508	60.2887	835.508	57.6054
835.99	43.7914	835.99	59.8449	835.99	60.4621	835.99	57.7614
836.472	43.8168	836.472	59.9836	836.472	60.6273	836.472	57.9158
836.955	43.8404	836.955	60.1117	836.955	60.786	836.955	58.0658
837.437	43.8609	837.437	60.2343	837.437	60.9422	837.437	58.2094
837.919	43.878	837.919	60.3585	837.919	61.1003	837.919	58.3463
838.401	43.8924	838.401	60.4906	838.401	61.2641	838.401	58.4779
838.883	43.906	838.883	60.6335	838.883	61.4353	838.883	58.6076
839.365	43.9212	839.365	60.7862	839.365	61.613	839.365	58.7394
839.847	43.9399	839.847	60.9444	839.847	61.7944	839.847	58.8764
840.329	43.963	840.329	61.1026	840.329	61.9763	840.329	59.0202
840.812	43.9896	840.812	61.2559	840.812	62.1561	840.812	59.1697
841.294	44.0172	841.294	61.4011	841.294	62.3317	841.294	59.3209
841.776	44.0419	841.776	61.5369	841.776	62.5013	841.776	59.4679
842.258	44.0596	842.258	61.6629	842.258	62.6621	842.258	59.6043
842.74	44.067	842.74	61.7788	842.74	62.8105	842.74	59.7255
843.222	44.0624	843.222	61.8843	843.222	62.943	843.222	59.8303
843.704	44.0465	843.704	61.9801	843.704	63.0574	843.704	59.921
844.186	44.0223	844.186	62.0682	844.186	63.1547	844.186	60.0033
844.668	43.9939	844.668	62.1528	844.668	63.2398	844.668	60.084
845.151	43.9658	845.151	62.239	845.151	63.3202	845.151	60.1689
845.633	43.9416	845.633	62.3315	845.633	63.4041	845.633	60.2605
846.115	43.9234	846.115	62.4329	846.115	63.498	846.115	60.3583
846.597	43.9119	846.597	62.5422	846.597	63.6042	846.597	60.4588
847.079	43.9068	847.079	62.6553	847.079	63.7207	847.079	60.5582
847.561	43.9072	847.561	62.7669	847.561	63.843	847.561	60.6537
848.043	43.9125	848.043	62.8727	848.043	63.9658	848.043	60.7456
848.525	43.9219	848.525	62.9709	848.525	64.0856	848.525	60.8361
849.008	43.9352	849.008	63.0626	849.008	64.2013	849.008	60.9285
849.49	43.9514	849.49	63.151	849.49	64.3142	849.49	61.0251
849.972	43.9694	849.972	63.2397	849.972	64.4263	849.972	61.1253
850.454	43.9879	850.454	63.3308	850.454	64.5393	850.454	61.2264
850.936	44.0061	850.936	63.4252	850.936	64.654	850.936	61.3241
851.418	44.0239	851.418	63.5223	851.418	64.7698	851.418	61.4149
851.9	44.0422	851.9	63.6219	851.9	64.8864	851.9	61.498
852.382	44.0619	852.382	63.7238	852.382	65.0035	852.382	61.5752
852.864	44.0835	852.864	63.8288	852.864	65.121	852.864	61.6505
853.347	44.1061	853.347	63.9368	853.347	65.2384	853.347	61.7284
853.829	44.1273	853.829	64.0459	853.829	65.3544	853.829	61.8115
854.311	44.1442	854.311	64.1523	854.311	65.4664	854.311	61.9005
854.793	44.154	854.793	64.251	854.793	65.572	854.793	61.9936
855.275	44.1561	855.275	64.3378	855.275	65.6697	855.275	62.0884
855.757	44.1522	855.757	64.4111	855.757	65.761	855.757	62.1829
856.239	44.146	856.239	64.4732	856.239	65.8498	856.239	62.2763
856.721	44.142	856.721	64.5296	856.721	65.9415	856.721	62.3692
857.203	44.1433	857.203	64.5873	857.203	66.0409	857.203	62.4624
857.686	44.1511	857.686	64.6516	857.686	66.1504	857.686	62.5559
858.168	44.1639	858.168	64.7249	858.168	66.2682	858.168	62.6487
858.65	44.1789	858.65	64.806	858.65	66.3899	858.65	62.7393
859.132	44.1932	859.132	64.8911	859.132	66.5098	859.132	62.8264
859.614	44.2056	859.614	64.9765	859.614	66.6236	859.614	62.9101
860.096	44.217	860.096	65.0597	860.096	66.7296	860.096	62.9921
860.578	44.2295	860.578	65.1404	860.578	66.8291	860.578	63.0748
861.06	44.2455	861.06	65.2198	861.06	66.9244	861.06	63.1602
861.543	44.266	861.543	65.299	861.543	67.0175	861.543	63.2487
862.025	44.2899	862.025	65.3774	862.025	67.1079	862.025	63.3387
862.507	44.3142	862.507	65.4533	862.507	67.1937	862.507	63.4273
862.989	44.3352	862.989	65.5239	862.989	67.272	862.989	63.5115
863.471	44.3498	863.471	65.5876	863.471	67.3412	863.471	63.5895
863.953	44.3567	863.953	65.6451	863.953	67.4024	863.953	63.6611
864.435	44.3563	864.435	65.6992	864.435	67.4595	864.435	63.7276
864.917	44.3503	864.917	65.7544	864.917	67.5177	864.917	63.7906
865.399	44.3413	865.399	65.8143	865.399	67.5815	865.399	63.8515
865.882	44.3314	865.882	65.8807	865.882	67.6533	865.882	63.9102
866.364	44.3228	866.364	65.9525	866.364	67.7325	866.364	63.9667
866.846	44.3171	866.846	66.0267	866.846	67.8163	866.846	64.0208
867.328	44.3158	867.328	66.0998	867.328	67.9013	867.328	64.0737
867.81	44.3197	867.81	66.1689	867.81	67.9848	867.81	64.1272
868.292	44.3288	868.292	66.233	868.292	68.0657	868.292	64.1836
868.774	44.3408	868.774	66.2919	868.774	68.1436	868.774	64.2439
869.256	44.3523	869.256	66.3464	869.256	68.2187	869.256	64.3075
869.739	44.3586	869.739	66.3965	869.739	68.2907	869.739	64.3718
870.221	44.3563	870.221	66.4418	870.221	68.3589	870.221	64.4334
870.703	44.3445	870.703	66.482	870.703	68.4232	870.703	64.4899
871.185	44.3258	871.185	66.518	871.185	68.4843	871.185	64.5407
871.667	44.306	871.667	66.552	871.667	68.5444	871.667	64.5874
872.149	44.2919	872.149	66.5877	872.149	68.6063	872.149	64.6331
872.631	44.2893	872.631	66.6285	872.631	68.6723	872.631	64.6805
873.113	44.3002	873.113	66.6767	873.113	68.7429	873.113	64.7312
873.596	44.3223	873.596	66.7321	873.596	68.8164	873.596	64.7846
874.078	44.3498	874.078	66.7921	874.078	68.8896	874.078	64.8393
874.56	44.3762	874.56	66.8532	874.56	68.9597	874.56	64.8938
875.042	44.3962	875.042	66.9126	875.042	69.0258	875.042	64.9485
875.524	44.4082	875.524	66.9695	875.524	69.0895	875.524	65.0054
876.006	44.4141	876.006	67.0253	876.006	69.155	876.006	65.0674
876.488	44.4178	876.488	67.0825	876.488	69.2267	876.488	65.1365
876.97	44.4238	876.97	67.1437	876.97	69.3076	876.97	65.2131
877.452	44.4348	877.452	67.2096	877.452	69.3976	877.452	65.2947
877.934	44.4514	877.934	67.2796	877.934	69.4941	877.934	65.3774
878.417	44.4728	878.417	67.3515	878.417	69.5927	878.417	65.4576
878.899	44.4973	878.899	67.4236	878.899	69.6894	878.899	65.5334
879.381	44.524	879.381	67.4951	879.381	69.7816	879.381	65.6051
879.863	44.5528	879.863	67.566	879.863	69.8681	879.863	65.6744
880.345	44.5834	880.345	67.6367	880.345	69.9485	880.345	65.7426
880.827	44.6149	880.827	67.7067	880.827	70.0221	880.827	65.8095
881.309	44.645	881.309	67.7739	881.309	70.0871	881.309	65.8725
881.791	44.6706	881.791	67.8349	881.791	70.1415	881.791	65.9279
882.274	44.6886	882.274	67.8864	882.274	70.1847	882.274	65.9729
882.756	44.698	882.756	67.9275	882.756	70.2187	882.756	66.0079
883.238	44.7002	883.238	67.9597	883.238	70.2487	883.238	66.0367
883.72	44.6993	883.72	67.9878	883.72	70.2819	883.72	66.0658
884.202	44.7001	884.202	68.0175	884.202	70.3251	884.202	66.1022
884.684	44.7068	884.684	68.0538	884.684	70.382	884.684	66.1504
885.166	44.7211	885.166	68.099	885.166	70.4521	885.166	66.2109
885.648	44.7419	885.648	68.1521	885.648	70.53	885.648	66.2804
886.13	44.7659	886.13	68.2093	886.13	70.6086	886.13	66.353
886.613	44.7891	886.613	68.2666	886.613	70.6813	886.613	66.4228
887.095	44.8087	887.095	68.3208	887.095	70.7447	887.095	66.4861
887.577	44.8231	887.577	68.3708	887.577	70.7993	887.577	66.5422
888.059	44.8324	888.059	68.4171	888.059	70.8484	888.059	66.5924
888.541	44.8372	888.541	68.4606	888.541	70.896	888.541	66.6389
889.023	44.838	889.023	68.5011	889.023	70.9443	889.023	66.6832
889.505	44.8351	889.505	68.5375	889.505	70.9936	889.505	66.7258
889.987	44.8289	889.987	68.5678	889.987	71.0419	889.987	66.7665
890.47	44.8207	890.47	68.5912	890.47	71.0877	890.47	66.8055
890.952	44.813	890.952	68.6086	890.952	71.1305	890.952	66.8439
891.434	44.8092	891.434	68.6234	891.434	71.1718	891.434	66.8835
891.916	44.812	891.916	68.64	891.916	71.2141	891.916	66.9257
892.398	44.8223	892.398	68.6624	892.398	71.2589	892.398	66.9703
892.88	44.838	892.88	68.692	892.88	71.3053	892.88	67.0145
893.362	44.8544	893.362	68.7273	893.362	71.35	893.362	67.0539
893.844	44.8661	893.844	68.7645	893.844	71.3881	893.844	67.084
894.326	44.8691	894.326	68.7992	894.326	71.4162	894.326	67.1027
894.808	44.8625	894.808	68.8291	894.808	71.4341	894.808	67.1114
895.291	44.8496	895.291	68.8544	895.291	71.4456	895.291	67.1153
895.773	44.8364	895.773	68.8782	895.773	71.4574	895.773	67.1218
896.255	44.8294	896.255	68.9049	896.255	71.4768	896.255	67.1377
896.737	44.8331	896.737	68.9379	896.737	71.5082	896.737	67.1669
897.219	44.8481	897.219	68.9779	897.219	71.5521	897.219	67.209
897.701	44.8717	897.701	69.0232	897.701	71.6043	897.701	67.2599
898.183	44.8985	898.183	69.0701	898.183	71.6586	898.183	67.3135
898.665	44.9235	898.665	69.1154	898.665	71.7092	898.665	67.3638
899.148	44.9433	899.148	69.157	899.148	71.7534	899.148	67.4076
899.63	44.9575	899.63	69.1959	899.63	71.7921	899.63	67.444
900.112	44.9681	900.112	69.2345	900.112	71.8296	900.112	67.4752
900.594	44.9784	900.594	69.2762	900.594	71.871	900.594	67.5047
901.076	44.9915	901.076	69.3231	901.076	71.9207	901.076	67.5364
901.558	45.0088	901.558	69.3758	901.558	71.9802	901.558	67.5735
902.04	45.0299	902.04	69.4326	902.04	72.0481	902.04	67.6179
902.522	45.0533	902.522	69.4903	902.522	72.1206	902.522	67.6705
903.005	45.0765	903.005	69.5454	903.005	72.193	903.005	67.7303
903.487	45.097	903.487	69.5948	903.487	72.2606	903.487	67.7946
903.969	45.113	903.969	69.6359	903.969	72.3193	903.969	67.8592
904.451	45.123	904.451	69.6673	904.451	72.3669	904.451	67.9188
904.933	45.1268	904.933	69.6886	904.933	72.4025	904.933	67.9681
905.415	45.1247	905.415	69.7	905.415	72.427	905.415	68.0036
905.897	45.1179	905.897	69.7033	905.897	72.4431	905.897	68.0252
906.379	45.1087	906.379	69.7011	906.379	72.4548	906.379	68.0358
906.861	45.0998	906.861	69.697	906.861	72.467	906.861	68.0413
907.344	45.0933	907.344	69.695	907.344	72.4839	907.344	68.0482
907.826	45.0907	907.826	69.6987	907.826	72.508	907.826	68.0616
908.308	45.0916	908.308	69.7101	908.308	72.5395	908.308	68.0836
908.79	45.0948	908.79	69.7297	908.79	72.5758	908.79	68.113
909.272	45.0982	909.272	69.7563	909.272	72.6129	909.272	68.1459
909.754	45.1004	909.754	69.788	909.754	72.6471	909.754	68.1785
910.236	45.1015	910.236	69.8226	910.236	72.6762	910.236	68.2079
910.718	45.1029	910.718	69.8588	910.718	72.7007	910.718	68.2343
911.201	45.1069	911.201	69.8957	911.201	72.7232	911.201	68.2595
911.683	45.1156	911.683	69.9326	911.683	72.7473	911.683	68.2864
912.165	45.1293	912.165	69.969	912.165	72.7757	912.165	68.3173
912.647	45.1463	912.647	70.0033	912.647	72.8093	912.647	68.3523
913.129	45.1631	913.129	70.0336	913.129	72.8461	913.129	68.39
913.611	45.1754	913.611	70.0584	913.611	72.8825	913.611	68.4278
914.093	45.1798	914.093	70.0765	914.093	72.9144	914.093	68.4635
914.575	45.1753	914.575	70.0886	914.575	72.9391	914.575	68.4964
915.057	45.1633	915.057	70.0967	915.057	72.9561	915.057	68.5275
915.54	45.1474	915.54	70.1039	915.54	72.9673	915.54	68.5589
916.022	45.1321	916.022	70.1134	916.022	72.977	916.022	68.5925
916.504	45.1216	916.504	70.128	916.504	72.9898	916.504	68.6293
916.986	45.1181	916.986	70.1487	916.986	73.0103	916.986	68.6688
917.468	45.1221	917.468	70.1754	917.468	73.0411	917.468	68.7089
917.95	45.1319	917.95	70.2063	917.95	73.083	917.95	68.7474
918.432	45.1447	918.432	70.2394	918.432	73.1342	918.432	68.7823
918.914	45.1577	918.914	70.272	918.914	73.1914	918.914	68.8129
919.396	45.1683	919.396	70.3024	919.396	73.2502	919.396	68.8395
919.879	45.1752	919.879	70.3294	919.879	73.3063	919.879	68.8637
920.361	45.1787	920.361	70.353	920.361	73.3569	920.361	68.8875
920.843	45.1797	920.843	70.374	920.843	73.4007	920.843	68.9125
921.325	45.18	921.325	70.394	921.325	73.4385	921.325	68.9401
921.807	45.1814	921.807	70.4146	921.807	73.4722	921.807	68.9706
922.289	45.1846	922.289	70.4372	922.289	73.5039	922.289	69.0036
922.771	45.1896	922.771	70.4623	922.771	73.5348	922.771	69.0385
923.253	45.1952	923.253	70.4898	923.253	73.5652	923.253	69.0744
923.736	45.2001	923.736	70.5189	923.736	73.594	923.736	69.1111
924.218	45.2031	924.218	70.5487	924.218	73.6202	924.218	69.1494
924.7	45.2042	924.7	70.5786	924.7	73.6437	924.7	69.1911
925.182	45.2046	925.182	70.6087	925.182	73.6659	925.182	69.2385
925.664	45.2066	925.664	70.6391	925.664	73.6897	925.664	69.2936
926.146	45.2124	926.146	70.6701	926.146	73.7178	926.146	69.3574
926.628	45.2232	926.628	70.701	926.628	73.7522	926.628	69.4281
927.11	45.2384	927.11	70.7304	927.11	73.7924	927.11	69.5021
927.592	45.2558	927.592	70.7562	927.592	73.8357	927.592	69.5742
928.075	45.2722	928.075	70.7766	928.075	73.8778	928.075	69.6395
928.557	45.2847	928.557	70.7913	928.557	73.9154	928.557	69.6954
929.039	45.292	929.039	70.8013	929.039	73.9469	929.039	69.7421
929.521	45.2948	929.521	70.8095	929.521	73.9737	929.521	69.783
930.003	45.2954	930.003	70.8192	930.003	73.9994	930.003	69.8232
930.485	45.2966	930.485	70.8333	930.485	74.0286	930.485	69.8674
930.967	45.3006	930.967	70.853	930.967	74.0643	930.967	69.9183
931.449	45.3081	931.449	70.8772	931.449	74.1074	931.449	69.9754
931.932	45.3181	931.932	70.9037	931.932	74.156	931.932	70.0359
932.414	45.3287	932.414	70.9297	932.414	74.2071	932.414	70.0959
932.896	45.3382	932.896	70.9537	932.896	74.2575	932.896	70.1522
933.378	45.3456	933.378	70.9758	933.378	74.3058	933.378	70.2039
933.86	45.3512	933.86	70.9981	933.86	74.3525	933.86	70.2523
934.342	45.3562	934.342	71.0233	934.342	74.3995	934.342	70.3003
934.824	45.3618	934.824	71.0541	934.824	74.4484	934.824	70.3507
935.306	45.3687	935.306	71.0914	935.306	74.4996	935.306	70.4048
935.788	45.3771	935.788	71.1343	935.788	74.5522	935.788	70.4623
936.271	45.3868	936.271	71.1809	936.271	74.604	936.271	70.5219
936.753	45.3975	936.753	71.2284	936.753	74.653	936.753	70.5819
937.235	45.4096	937.235	71.2745	937.235	74.6988	937.235	70.6419
937.717	45.4235	937.717	71.3177	937.717	74.7423	937.717	70.7023
938.199	45.4395	938.199	71.3573	938.199	74.7862	938.199	70.7647
938.681	45.4571	938.681	71.3932	938.681	74.8331	938.681	70.8302
939.163	45.4748	939.163	71.4258	939.163	74.8845	939.163	70.899
939.645	45.4906	939.645	71.4557	939.645	74.9404	939.645	70.9699
940.128	45.5025	940.128	71.4842	940.128	74.9991	940.128	71.0407
940.61	45.5098	940.61	71.513	940.61	75.0586	940.61	71.1094
941.092	45.5133	941.092	71.5442	941.092	75.1172	941.092	71.1749
941.574	45.5154	941.574	71.5803	941.574	75.1746	941.574	71.2374
942.056	45.519	942.056	71.6226	942.056	75.2318	942.056	71.2981
942.538	45.5263	942.538	71.6718	942.538	75.2903	942.538	71.3585
943.02	45.5381	943.02	71.7271	943.02	75.3518	943.02	71.4194
943.502	45.5533	943.502	71.787	943.502	75.4176	943.502	71.4805
943.984	45.5695	943.984	71.8505	943.984	75.4882	943.984	71.5411
944.467	45.5841	944.467	71.9174	944.467	75.5639	944.467	71.6007
944.949	45.5955	944.949	71.9888	944.949	75.6453	944.949	71.6597
945.431	45.6037	945.431	72.0666	945.431	75.733	945.431	71.7201
945.913	45.6098	945.913	72.1524	945.913	75.8276	945.913	71.785
946.395	45.6157	946.395	72.2466	946.395	75.9291	946.395	71.8576
946.877	45.623	946.877	72.3477	946.877	76.0367	946.877	71.9403
947.359	45.6327	947.359	72.4529	947.359	76.1487	947.359	72.0341
947.841	45.6444	947.841	72.5588	947.841	76.2628	947.841	72.1379
948.323	45.6574	948.323	72.6629	948.323	76.3774	948.323	72.2493
948.806	45.6705	948.806	72.764	948.806	76.4916	948.806	72.3654
949.288	45.6827	949.288	72.8625	949.288	76.6057	949.288	72.4832
949.77	45.6932	949.77	72.9598	949.77	76.7206	949.77	72.5999
950.252	45.7015	950.252	73.0576	950.252	76.8374	950.252	72.7136
950.734	45.707	950.734	73.1574	950.734	76.9563	950.734	72.823
951.216	45.7095	951.216	73.2601	951.216	77.0776	951.216	72.9277
951.698	45.7094	951.698	73.367	951.698	77.2011	951.698	73.0283
952.18	45.7076	952.18	73.4802	952.18	77.3273	952.18	73.127
952.663	45.7059	952.663	73.6027	952.663	77.4575	952.663	73.2269
953.145	45.7066	953.145	73.7387	953.145	77.5941	953.145	73.3322
953.627	45.7118	953.627	73.892	953.627	77.7395	953.627	73.4468
954.109	45.7225	954.109	74.0653	954.109	77.8956	954.109	73.5734
954.591	45.7384	954.591	74.2587	954.591	78.0624	954.591	73.7131
955.073	45.7579	955.073	74.4702	955.073	78.2382	955.073	73.8646
955.555	45.7787	955.555	74.6954	955.555	78.4197	955.555	74.025
956.037	45.7986	956.037	74.9293	956.037	78.6031	956.037	74.1904
956.519	45.8159	956.519	75.1664	956.519	78.7846	956.519	74.3567
957.002	45.8298	957.002	75.4022	957.002	78.9613	957.002	74.521
957.484	45.84	957.484	75.6325	957.484	79.1315	957.484	74.6814
957.966	45.8467	957.966	75.8545	957.966	79.295	957.966	74.8377
958.448	45.85	958.448	76.0661	958.448	79.4521	958.448	74.9912
958.93	45.8498	958.93	76.2666	958.93	79.6047	958.93	75.1442
959.412	45.8467	959.412	76.457	959.412	79.755	959.412	75.3
959.894	45.8418	959.894	76.6401	959.894	79.9064	959.894	75.4624
960.376	45.8369	960.376	76.8209	960.376	80.0627	960.376	75.6352
960.859	45.8345	960.859	77.0052	960.859	80.2277	960.859	75.8215
961.341	45.8367	961.341	77.1988	961.341	80.4045	961.341	76.0234
961.823	45.8445	961.823	77.4065	961.823	80.5948	961.823	76.2413
962.305	45.8574	962.305	77.6307	962.305	80.7985	962.305	76.4748
962.787	45.8737	962.787	77.8714	962.787	81.0137	962.787	76.7224
963.269	45.8911	963.269	78.1268	963.269	81.238	963.269	76.9828
963.751	45.9076	963.751	78.3939	963.751	81.4688	963.751	77.2555
964.233	45.9223	964.233	78.6697	964.233	81.7045	964.233	77.5408
964.716	45.9354	964.716	78.9521	964.716	81.9448	964.716	77.8396
965.198	45.9477	965.198	79.2397	965.198	82.1904	965.198	78.153
965.68	45.9599	965.68	79.5323	965.68	82.4429	965.68	78.4814
966.162	45.972	966.162	79.8299	966.162	82.7035	966.162	78.8238
966.644	45.9832	966.644	80.133	966.644	82.9733	966.644	79.1786
967.126	45.9923	967.126	80.4414	967.126	83.2522	967.126	79.5431
967.608	45.9985	967.608	80.7545	967.608	83.5394	967.608	79.9143
968.09	46.0019	968.09	81.0708	968.09	83.833	968.09	80.2895
968.572	46.0037	968.572	81.3881	968.572	84.1302	968.572	80.6662
969.054	46.0059	969.054	81.7034	969.054	84.4276	969.054	81.0417
969.537	46.0104	969.537	82.0132	969.537	84.721	969.537	81.4131
970.019	46.0185	970.019	82.3139	970.019	85.006	970.019	81.7769
970.501	46.03	970.501	82.602	970.501	85.278	970.501	82.1286
970.983	46.0441	970.983	82.8742	970.983	85.5334	970.983	82.4632
971.465	46.0594	971.465	83.1274	971.465	85.7689	971.465	82.7754
971.947	46.0745	971.947	83.359	971.947	85.9825	971.947	83.0602
972.429	46.0886	972.429	83.5665	972.429	86.1735	972.429	83.3136
972.911	46.1011	972.911	83.7478	972.911	86.342	972.911	83.533
973.394	46.1116	973.394	83.9019	973.394	86.4889	973.394	83.7182
973.876	46.12	973.876	84.029	973.876	86.616	973.876	83.871
974.358	46.1261	974.358	84.131	974.358	86.7251	974.358	83.9949
974.84	46.13	974.84	84.2109	974.84	86.818	974.84	84.0944
975.322	46.1326	975.322	84.2729	975.322	86.8964	975.322	84.1739
975.804	46.1354	975.804	84.3211	975.804	86.9613	975.804	84.2373
976.286	46.1403	976.286	84.359	976.286	87.0137	976.286	84.2872
976.768	46.149	976.768	84.3893	976.768	87.0545	976.768	84.3252
977.25	46.1619	977.25	84.4133	977.25	87.0849	977.25	84.3527
977.733	46.1785	977.733	84.432	977.733	87.1065	977.733	84.3712
978.215	46.197	978.215	84.4456	978.215	87.1215	978.215	84.3822
978.697	46.2152	978.697	84.4541	978.697	87.1319	978.697	84.3875
979.179	46.2312	979.179	84.4574	979.179	87.1393	979.179	84.3882
979.661	46.2444	979.661	84.455	979.661	87.1442	979.661	84.3846
980.143	46.2552	980.143	84.4464	980.143	87.146	980.143	84.3757
980.625	46.2645	980.625	84.4302	980.625	87.1428	980.625	84.3596
981.107	46.2734	981.107	84.4057	981.107	87.1325	981.107	84.3342
981.59	46.2824	981.59	84.3723	981.59	87.1134	981.59	84.2978
982.072	46.2912	982.072	84.3307	982.072	87.0849	982.072	84.2503
982.554	46.2991	982.554	84.2827	982.554	87.0481	982.554	84.1929
983.036	46.306	983.036	84.2313	983.036	87.0056	983.036	84.1282
983.518	46.312	983.518	84.1799	983.518	86.9609	983.518	84.0593
984	46.318	984	84.1315	984	86.9177	984	83.9888
984.482	46.3251	984.482	84.088	984.482	86.8788	984.482	83.9189
984.964	46.3339	984.964	84.0501	984.964	86.8456	984.964	83.8504
985.447	46.344	985.447	84.0166	985.447	86.818	985.447	83.7834
985.929	46.3544	985.929	83.9857	985.929	86.7947	985.929	83.7176
986.411	46.3638	986.411	83.9552	986.411	86.7737	986.411	83.6531
986.893	46.3716	986.893	83.9238	986.893	86.7532	986.893	83.5905
987.375	46.3779	987.375	83.8909	987.375	86.7324	987.375	83.531
987.857	46.3839	987.857	83.8573	987.857	86.7111	987.857	83.4762
988.339	46.3906	988.339	83.8243	988.339	86.6894	988.339	83.4273
988.821	46.3987	988.821	83.7933	988.821	86.6677	988.821	83.3843
989.303	46.4076	989.303	83.7646	989.303	86.6459	989.303	83.3463
989.785	46.4153	989.785	83.7377	989.785	86.6233	989.785	83.3106
990.268	46.4195	990.268	83.7111	990.268	86.5988	990.268	83.2741
990.75	46.4188	990.75	83.683	990.75	86.5714	990.75	83.2338
991.232	46.4132	991.232	83.6518	991.232	86.5409	991.232	83.1879
991.714	46.405	991.714	83.6172	991.714	86.5084	991.714	83.1364
992.196	46.3979	992.196	83.5802	992.196	86.4759	992.196	83.0811
992.678	46.3959	992.678	83.5429	992.678	86.4464	992.678	83.0249
993.16	46.4019	993.16	83.5074	993.16	86.4222	993.16	82.9712
993.643	46.4169	993.643	83.4756	993.643	86.4049	993.643	82.9221
994.125	46.4395	994.125	83.4479	994.125	86.3943	994.125	82.878
994.607	46.4668	994.607	83.4232	994.607	86.3882	994.607	82.8375
995.089	46.495	995.089	83.399	995.089	86.3837	995.089	82.7975
995.571	46.5207	995.571	83.3723	995.571	86.3772	995.571	82.755
996.053	46.5415	996.053	83.3406	996.053	86.366	996.053	82.7076
996.535	46.5564	996.535	83.3027	996.535	86.3486	996.535	82.6547
997.017	46.5652	997.017	83.2591	997.017	86.3255	997.017	82.5978
997.499	46.5691	997.499	83.212	997.499	86.2983	997.499	82.5395
997.981	46.5701	997.981	83.1645	997.981	86.2698	997.981	82.4833
998.464	46.5708	998.464	83.1201	998.464	86.2425	998.464	82.432
998.946	46.5738	998.946	83.0818	998.946	86.2184	998.946	82.3873
999.428	46.5816	999.428	83.0513	999.428	86.1985	999.428	82.3498
999.91	46.5958	999.91	83.0291	999.91	86.1826	999.91	82.3186
1000.39	46.6163	1000.39	83.014	1000.39	86.1693	1000.39	82.2921
1000.87	46.6412	1000.87	83.0038	1000.87	86.157	1000.87	82.2683
1001.36	46.6675	1001.36	82.9953	1001.36	86.1433	1001.36	82.245
1001.84	46.6914	1001.84	82.9849	1001.84	86.1261	1001.84	82.2199
1002.32	46.7099	1002.32	82.9691	1002.32	86.1037	1002.32	82.1907
1002.8	46.7211	1002.8	82.9451	1002.8	86.0752	1002.8	82.1553
1003.28	46.7253	1003.28	82.9117	1003.28	86.0407	1003.28	82.1124
1003.77	46.7244	1003.77	82.8689	1003.77	86.0014	1003.77	82.0617
1004.25	46.7208	1004.25	82.8191	1004.25	85.9597	1004.25	82.0046
1004.73	46.7174	1004.73	82.7655	1004.73	85.9189	1004.73	81.9442
1005.21	46.7163	1005.21	82.7124	1005.21	85.8822	1005.21	81.8843
1005.7	46.7191	1005.7	82.6638	1005.7	85.8528	1005.7	81.8291
1006.18	46.7264	1006.18	82.6228	1006.18	85.8325	1006.18	81.7818
1006.66	46.7382	1006.66	82.5906	1006.66	85.822	1006.66	81.7439
1007.14	46.7543	1007.14	82.5671	1007.14	85.8202	1007.14	81.7151
1007.62	46.7736	1007.62	82.5505	1007.62	85.8246	1007.62	81.6935
1008.11	46.7944	1008.11	82.5385	1008.11	85.8318	1008.11	81.6758
1008.59	46.8143	1008.59	82.5286	1008.59	85.8379	1008.59	81.6586
1009.07	46.8308	1009.07	82.5183	1009.07	85.8394	1009.07	81.6387
1009.55	46.8416	1009.55	82.5056	1009.55	85.8332	1009.55	81.6137
1010.03	46.8455	1010.03	82.4886	1010.03	85.8176	1010.03	81.5824
1010.52	46.8431	1010.52	82.4661	1010.52	85.7921	1010.52	81.5439
1011	46.8362	1011	82.437	1011	85.7573	1011	81.4985
1011.48	46.8277	1011.48	82.4014	1011.48	85.7154	1011.48	81.4468
1011.96	46.8205	1011.96	82.3601	1011.96	85.669	1011.96	81.3901
1012.45	46.8166	1012.45	82.3151	1012.45	85.6217	1012.45	81.3305
1012.93	46.8171	1012.93	82.2696	1012.93	85.5766	1012.93	81.2705
1013.41	46.8222	1013.41	82.2271	1013.41	85.5366	1013.41	81.2128
1013.89	46.8312	1013.89	82.1907	1013.89	85.5034	1013.89	81.1599
1014.37	46.8438	1014.37	82.1623	1014.37	85.4775	1014.37	81.1136
1014.86	46.8595	1014.86	82.1419	1014.86	85.4583	1014.86	81.0747
1015.34	46.8778	1015.34	82.1278	1015.34	85.4444	1015.34	81.0428
1015.82	46.8981	1015.82	82.1171	1015.82	85.4342	1015.82	81.0163
1016.3	46.9192	1016.3	82.1069	1016.3	85.4258	1016.3	80.9932
1016.78	46.9392	1016.78	82.0948	1016.78	85.4185	1016.78	80.9714
1017.27	46.9565	1017.27	82.0801	1017.27	85.4116	1017.27	80.949
1017.75	46.9696	1017.75	82.0631	1017.75	85.4052	1017.75	80.925
1018.23	46.9782	1018.23	82.0457	1018.23	85.3994	1018.23	80.8989
1018.71	46.9832	1018.71	82.0296	1018.71	85.3937	1018.71	80.8708
1019.2	46.9857	1019.2	82.0159	1019.2	85.3872	1019.2	80.8408
1019.68	46.9873	1019.68	82.0045	1019.68	85.3781	1019.68	80.809
1020.16	46.989	1020.16	81.9941	1020.16	85.3648	1020.16	80.7751
1020.64	46.9913	1020.64	81.9825	1020.64	85.3462	1020.64	80.7388
1021.12	46.9938	1021.12	81.9676	1021.12	85.3221	1021.12	80.6994
1021.61	46.9966	1021.61	81.948	1021.61	85.2941	1021.61	80.6572
1022.09	46.9998	1022.09	81.9239	1022.09	85.2648	1022.09	80.6129
1022.57	47.0041	1022.57	81.8965	1022.57	85.2373	1022.57	80.568
1023.05	47.0103	1023.05	81.8683	1023.05	85.2145	1023.05	80.5247
1023.53	47.0191	1023.53	81.8421	1023.53	85.198	1023.53	80.4854
1024.02	47.0305	1024.02	81.8202	1024.02	85.1876	1024.02	80.4522
1024.5	47.0437	1024.5	81.8041	1024.5	85.1817	1024.5	80.4262
1024.98	47.0578	1024.98	81.7938	1024.98	85.1774	1024.98	80.4077
1025.46	47.0716	1025.46	81.7883	1025.46	85.172	1025.46	80.3956
1025.94	47.0847	1025.94	81.7858	1025.94	85.1637	1025.94	80.3881
1026.43	47.0974	1026.43	81.784	1026.43	85.1518	1026.43	80.383
1026.91	47.11	1026.91	81.7806	1026.91	85.1373	1026.91	80.3778
1027.39	47.1228	1027.39	81.7744	1027.39	85.1219	1027.39	80.3702
1027.87	47.1358	1027.87	81.7645	1027.87	85.1074	1027.87	80.3583
1028.36	47.1481	1028.36	81.7512	1028.36	85.0954	1028.36	80.3407
1028.84	47.1589	1028.84	81.7354	1028.84	85.0866	1028.84	80.3164
1029.32	47.1676	1029.32	81.7189	1029.32	85.081	1029.32	80.2853
1029.8	47.1743	1029.8	81.7033	1029.8	85.0783	1029.8	80.2482
1030.28	47.1799	1030.28	81.6903	1030.28	85.0783	1030.28	80.207
1030.77	47.1858	1030.77	81.6807	1030.77	85.0808	1030.77	80.1642
1031.25	47.1934	1031.25	81.6746	1031.25	85.0859	1031.25	80.1227
1031.73	47.203	1031.73	81.6712	1031.73	85.0931	1031.73	80.085
1032.21	47.214	1032.21	81.6684	1032.21	85.1011	1032.21	80.0523
1032.69	47.225	1032.69	81.6638	1032.69	85.1077	1032.69	80.0245
1033.18	47.2341	1033.18	81.6553	1033.18	85.1103	1033.18	79.9999
1033.66	47.2398	1033.66	81.6414	1033.66	85.1059	1033.66	79.9759
1034.14	47.2415	1034.14	81.6219	1034.14	85.0931	1034.14	79.9501
1034.62	47.2397	1034.62	81.5986	1034.62	85.0721	1034.62	79.9208
1035.1	47.2358	1035.1	81.5743	1035.1	85.0453	1035.1	79.8882
1035.59	47.232	1035.59	81.5527	1035.59	85.017	1035.59	79.8537
1036.07	47.2304	1036.07	81.5374	1036.07	84.992	1036.07	79.8202
1036.55	47.233	1036.55	81.5305	1036.55	84.974	1036.55	79.7904
1037.03	47.2411	1037.03	81.5321	1037.03	84.9652	1037.03	79.7661
1037.52	47.2553	1037.52	81.5402	1037.52	84.9648	1037.52	79.7476
1038	47.275	1038	81.551	1038	84.9698	1038	79.7334
1038.48	47.2985	1038.48	81.5598	1038.48	84.9759	1038.48	79.7205
1038.96	47.3233	1038.96	81.5625	1038.96	84.9785	1038.96	79.706
1039.44	47.3467	1039.44	81.5566	1039.44	84.9749	1039.44	79.6871
1039.93	47.3663	1039.93	81.5417	1039.93	84.9642	1039.93	79.6629
1040.41	47.3806	1040.41	81.52	1040.41	84.948	1040.41	79.6337
1040.89	47.39	1040.89	81.4951	1040.89	84.9297	1040.89	79.6018
1041.37	47.3957	1041.37	81.4711	1041.37	84.913	1041.37	79.57
1041.85	47.3998	1041.85	81.4516	1041.85	84.9012	1041.85	79.5413
1042.34	47.4042	1042.34	81.4386	1042.34	84.8959	1042.34	79.5176
1042.82	47.41	1042.82	81.4322	1042.82	84.8973	1042.82	79.5001
1043.3	47.4174	1043.3	81.4308	1043.3	84.9042	1043.3	79.4879
1043.78	47.4257	1043.78	81.4317	1043.78	84.9144	1043.78	79.4794
1044.27	47.434	1044.27	81.4319	1044.27	84.9255	1044.27	79.472
1044.75	47.4417	1044.75	81.4291	1044.75	84.9353	1044.75	79.463
1045.23	47.4481	1045.23	81.4218	1045.23	84.9421	1045.23	79.45
1045.71	47.4528	1045.71	81.4101	1045.71	84.9444	1045.71	79.4316
1046.19	47.4545	1046.19	81.3951	1046.19	84.9414	1046.19	79.4073
1046.67	47.4517	1046.67	81.3787	1046.67	84.9328	1046.67	79.3778
1047.16	47.4423	1047.16	81.3628	1047.16	84.9191	1047.16	79.3445
1047.64	47.4251	1047.64	81.3494	1047.64	84.9015	1047.64	79.3092
1048.12	47.4009	1048.12	81.3391	1048.12	84.882	1048.12	79.2736
1048.6	47.3724	1048.6	81.3317	1048.6	84.8626	1048.6	79.2388
1049.09	47.3448	1049.09	81.326	1049.09	84.845	1049.09	79.2053
1049.57	47.3235	1049.57	81.3199	1049.57	84.8297	1049.57	79.1727
1050.05	47.3133	1050.05	81.311	1050.05	84.816	1050.05	79.1402
1050.53	47.3161	1050.53	81.2977	1050.53	84.8023	1050.53	79.1071
1051.01	47.3307	1051.01	81.2795	1051.01	84.7866	1051.01	79.073
1051.5	47.3534	1051.5	81.2577	1051.5	84.7678	1051.5	79.0389
1051.98	47.3798	1051.98	81.2352	1051.98	84.7466	1051.98	79.0065
1052.46	47.4064	1052.46	81.2159	1052.46	84.7254	1052.46	78.9786
1052.94	47.432	1052.94	81.2038	1052.94	84.708	1052.94	78.9583
1053.42	47.4573	1053.42	81.2019	1053.42	84.6983	1053.42	78.9476
1053.91	47.4844	1053.91	81.2108	1053.91	84.6984	1053.91	78.9472
1054.39	47.5142	1054.39	81.2288	1054.39	84.7083	1054.39	78.9554
1054.87	47.5458	1054.87	81.2521	1054.87	84.7249	1054.87	78.9686
1055.35	47.5763	1055.35	81.2753	1055.35	84.7434	1055.35	78.9819
1055.84	47.6013	1055.84	81.2932	1055.84	84.7585	1055.84	78.9903
1056.32	47.6173	1056.32	81.302	1056.32	84.7665	1056.32	78.9899
1056.8	47.6228	1056.8	81.2998	1056.8	84.7661	1056.8	78.9792
1057.28	47.6192	1057.28	81.2878	1057.28	84.7594	1057.28	78.9591
1057.76	47.6099	1057.76	81.2687	1057.76	84.7502	1057.76	78.9326
1058.25	47.5995	1058.25	81.2468	1058.25	84.7431	1058.25	78.9034
1058.73	47.5919	1058.73	81.2262	1058.73	84.7417	1058.73	78.875
1059.21	47.5892	1059.21	81.2097	1059.21	84.7469	1059.21	78.8497
1059.69	47.5916	1059.69	81.1986	1059.69	84.7575	1059.69	78.8278
1060.17	47.5982	1060.17	81.1922	1060.17	84.7702	1060.17	78.8081
1060.66	47.6076	1060.66	81.1887	1060.66	84.7807	1060.66	78.7887
1061.14	47.619	1061.14	81.1857	1061.14	84.7857	1061.14	78.7677
1061.62	47.6322	1061.62	81.1815	1061.62	84.7836	1061.62	78.7443
1062.1	47.6469	1062.1	81.1753	1062.1	84.7749	1062.1	78.719
1062.59	47.663	1062.59	81.1677	1062.59	84.7615	1062.59	78.6933
1063.07	47.6792	1063.07	81.1608	1063.07	84.7466	1063.07	78.6694
1063.55	47.6943	1063.55	81.1566	1063.55	84.7332	1063.55	78.6491
1064.03	47.7071	1064.03	81.1573	1064.03	84.7236	1064.03	78.6338
1064.51	47.7172	1064.51	81.1635	1064.51	84.7184	1064.51	78.6235
1065	47.7248	1065	81.1746	1065	84.7173	1065	78.6173
1065.48	47.7309	1065.48	81.1885	1065.48	84.7191	1065.48	78.6134
1065.96	47.7365	1065.96	81.2023	1065.96	84.7219	1065.96	78.6097
1066.44	47.7419	1066.44	81.2131	1066.44	84.7243	1066.44	78.6042
1066.92	47.7468	1066.92	81.2187	1066.92	84.7254	1066.92	78.5958
1067.41	47.7505	1067.41	81.2182	1067.41	84.7248	1067.41	78.584
1067.89	47.7527	1067.89	81.2122	1067.89	84.7229	1067.89	78.5691
1068.37	47.7541	1068.37	81.2025	1068.37	84.7203	1068.37	78.5521
1068.85	47.7558	1068.85	81.1909	1068.85	84.7175	1068.85	78.5342
1069.34	47.7598	1069.34	81.1795	1069.34	84.7146	1069.34	78.5161
1069.82	47.7671	1069.82	81.1691	1069.82	84.7112	1069.82	78.4979
1070.3	47.7777	1070.3	81.1597	1070.3	84.7065	1070.3	78.4791
1070.78	47.7901	1070.78	81.1506	1070.78	84.6998	1070.78	78.4585
1071.26	47.8021	1071.26	81.1402	1071.26	84.6908	1071.26	78.435
1071.74	47.8118	1071.74	81.1276	1071.74	84.6796	1071.74	78.4077
1072.23	47.8183	1072.23	81.1122	1072.23	84.6669	1072.23	78.3767
1072.71	47.822	1072.71	81.0942	1072.71	84.6536	1072.71	78.3432
1073.19	47.8246	1073.19	81.0751	1073.19	84.6406	1073.19	78.3089
1073.67	47.8281	1073.67	81.0573	1073.67	84.6288	1073.67	78.276
1074.16	47.8338	1074.16	81.0436	1074.16	84.6187	1074.16	78.2468
1074.64	47.8424	1074.64	81.0374	1074.64	84.6112	1074.64	78.2231
1075.12	47.8539	1075.12	81.0416	1075.12	84.6074	1075.12	78.2063
1075.6	47.8682	1075.6	81.0583	1075.6	84.6093	1075.6	78.1976
1076.08	47.8858	1076.08	81.0881	1076.08	84.6183	1076.08	78.1974
1076.57	47.9071	1076.57	81.1296	1076.57	84.6358	1076.57	78.2055
1077.05	47.9329	1077.05	81.1792	1077.05	84.6614	1077.05	78.2207
1077.53	47.9625	1077.53	81.2313	1077.53	84.6928	1077.53	78.2404
1078.01	47.9939	1078.01	81.2794	1078.01	84.7258	1078.01	78.261
1078.49	48.0237	1078.49	81.3169	1078.49	84.7553	1078.49	78.2778
1078.98	48.0477	1078.98	81.339	1078.98	84.7768	1078.98	78.2867
1079.46	48.0629	1079.46	81.3433	1079.46	84.7872	1079.46	78.2845
1079.94	48.0679	1079.94	81.3304	1079.94	84.7863	1079.94	78.2705
1080.42	48.0639	1080.42	81.3039	1080.42	84.7761	1080.42	78.2459
1080.91	48.0537	1080.91	81.2686	1080.91	84.7603	1080.91	78.2142
1081.39	48.0408	1081.39	81.2298	1081.39	84.7424	1081.39	78.1795
1081.87	48.0279	1081.87	81.1919	1081.87	84.7248	1081.87	78.1456
1082.35	48.0163	1082.35	81.1573	1082.35	84.7079	1082.35	78.1147
1082.83	48.0058	1082.83	81.1267	1082.83	84.6909	1082.83	78.0877
1083.32	47.9957	1083.32	81.0993	1083.32	84.6724	1083.32	78.0642
1083.8	47.9857	1083.8	81.0742	1083.8	84.6522	1083.8	78.0431
1084.28	47.9766	1084.28	81.0511	1084.28	84.6313	1084.28	78.0239
1084.76	47.9701	1084.76	81.0306	1084.76	84.6125	1084.76	78.0067
1085.24	47.9684	1085.24	81.0145	1085.24	84.5991	1085.24	77.9921
1085.73	47.9729	1085.73	81.0045	1085.73	84.5934	1085.73	77.9809
1086.21	47.9838	1086.21	81.0023	1086.21	84.5963	1086.21	77.9735
1086.69	48.0001	1086.69	81.0079	1086.69	84.6061	1086.69	77.9698
1087.17	48.0205	1087.17	81.0204	1087.17	84.6199	1087.17	77.9694
1087.65	48.0439	1087.65	81.0378	1087.65	84.6344	1087.65	77.9719
1088.14	48.0699	1088.14	81.0581	1088.14	84.6475	1088.14	77.9773
1088.62	48.099	1088.62	81.0793	1088.62	84.6584	1088.62	77.9862
1089.1	48.1315	1089.1	81.1	1089.1	84.6682	1089.1	77.9989
1089.58	48.1665	1089.58	81.1194	1089.58	84.6782	1089.58	78.0147
1090.07	48.2016	1090.07	81.1364	1090.07	84.6891	1090.07	78.0313
1090.55	48.2331	1090.55	81.1494	1090.55	84.7	1090.55	78.0446
1091.03	48.2565	1091.03	81.1559	1091.03	84.7081	1091.03	78.0497
1091.51	48.2688	1091.51	81.1531	1091.51	84.71	1091.51	78.0423
1091.99	48.2688	1091.99	81.1388	1091.99	84.7026	1091.99	78.0199
1092.48	48.258	1092.48	81.1123	1092.48	84.6849	1092.48	77.9836
1092.96	48.24	1092.96	81.075	1092.96	84.6585	1092.96	77.9373
1093.44	48.2195	1093.44	81.031	1093.44	84.6273	1093.44	77.8875
1093.92	48.201	1093.92	80.9858	1093.92	84.5967	1093.92	77.8412
1094.4	48.1877	1094.4	80.9457	1094.4	84.5716	1094.4	77.8043
1094.89	48.1812	1094.89	80.9153	1094.89	84.5556	1094.89	77.7799
1095.37	48.1817	1095.37	80.8975	1095.37	84.55	1095.37	77.7686
1095.85	48.1889	1095.85	80.8924	1095.85	84.5541	1095.85	77.7685
1096.33	48.2018	1096.33	80.8979	1096.33	84.5657	1096.33	77.7764
1096.82	48.2195	1096.82	80.9109	1096.82	84.5821	1096.82	77.7889
1097.3	48.2409	1097.3	80.9276	1097.3	84.6009	1097.3	77.8031
1097.78	48.2647	1097.78	80.945	1097.78	84.6205	1097.78	77.8165
1098.26	48.2895	1098.26	80.9608	1098.26	84.6394	1098.26	77.8275
1098.74	48.3135	1098.74	80.9734	1098.74	84.6566	1098.74	77.8344
1099.23	48.3355	1099.23	80.9823	1099.23	84.6709	1099.23	77.8361
1099.71	48.3546	1099.71	80.9868	1099.71	84.6812	1099.71	77.8316
1100.19	48.371	1100.19	80.9872	1100.19	84.6867	1100.19	77.8212
1100.67	48.3851	1100.67	80.9842	1100.67	84.6876	1100.67	77.8063
1101.15	48.398	1101.15	80.9792	1101.15	84.685	1101.15	77.7892
1101.64	48.4109	1101.64	80.9744	1101.64	84.6811	1101.64	77.7732
1102.12	48.4245	1102.12	80.9717	1102.12	84.6784	1102.12	77.7607
1102.6	48.4391	1102.6	80.9721	1102.6	84.6786	1102.6	77.753
1103.08	48.4545	1103.08	80.9752	1103.08	84.6821	1103.08	77.7496
1103.57	48.4697	1103.57	80.9788	1103.57	84.6877	1103.57	77.7483
1104.05	48.4837	1104.05	80.98	1104.05	84.6926	1104.05	77.7463
1104.53	48.4951	1104.53	80.9756	1104.53	84.6936	1104.53	77.7407
1105.01	48.503	1105.01	80.9641	1105.01	84.6883	1105.01	77.7305
1105.49	48.5072	1105.49	80.9462	1105.49	84.6759	1105.49	77.7159
1105.98	48.5085	1105.98	80.9247	1105.98	84.6577	1105.98	77.6992
1106.46	48.5086	1106.46	80.9043	1106.46	84.6367	1106.46	77.6831
1106.94	48.5095	1106.94	80.8891	1106.94	84.6162	1106.94	77.6699
1107.42	48.5133	1107.42	80.8819	1107.42	84.5991	1107.42	77.6605
1107.9	48.5209	1107.9	80.8829	1107.9	84.5862	1107.9	77.6538
1108.39	48.5319	1108.39	80.8899	1108.39	84.5768	1108.39	77.6476
1108.87	48.5448	1108.87	80.8991	1108.87	84.5687	1108.87	77.639
1109.35	48.5575	1109.35	80.9066	1109.35	84.5594	1109.35	77.6259
1109.83	48.5682	1109.83	80.91	1109.83	84.5479	1109.83	77.6083
1110.32	48.5763	1110.32	80.9085	1110.32	84.5349	1110.32	77.5878
1110.8	48.5823	1110.8	80.9036	1110.8	84.523	1110.8	77.5679
1111.28	48.5881	1111.28	80.8973	1111.28	84.5158	1111.28	77.5523
1111.76	48.5952	1111.76	80.8917	1111.76	84.5162	1111.76	77.5435
1112.24	48.6045	1112.24	80.8876	1112.24	84.5254	1112.24	77.5419
1112.72	48.6154	1112.72	80.8843	1112.72	84.5421	1112.72	77.5455
1113.21	48.6262	1113.21	80.8802	1113.21	84.5626	1113.21	77.5504
1113.69	48.6351	1113.69	80.8732	1113.69	84.5821	1113.69	77.5522
1114.17	48.6409	1114.17	80.8622	1114.17	84.5965	1114.17	77.5476
1114.65	48.6438	1114.65	80.8468	1114.65	84.6032	1114.65	77.5352
1115.14	48.6453	1115.14	80.8281	1115.14	84.6021	1115.14	77.5163
1115.62	48.6477	1115.62	80.8078	1115.62	84.5949	1115.62	77.4942
1116.1	48.6524	1116.1	80.7876	1116.1	84.5846	1116.1	77.4726
1116.58	48.6599	1116.58	80.7687	1116.58	84.5739	1116.58	77.4549
1117.06	48.6689	1117.06	80.7514	1117.06	84.5642	1117.06	77.4424
1117.55	48.6774	1117.55	80.7354	1117.55	84.5554	1117.55	77.4348
1118.03	48.6835	1118.03	80.72	1118.03	84.5468	1118.03	77.4304
1118.51	48.6865	1118.51	80.7049	1118.51	84.5372	1118.51	77.4269
1118.99	48.6872	1118.99	80.6899	1118.99	84.5261	1118.99	77.4226
1119.47	48.6875	1119.47	80.6756	1119.47	84.5145	1119.47	77.4168
1119.96	48.6895	1119.96	80.6626	1119.96	84.5037	1119.96	77.4097
1120.44	48.6945	1120.44	80.6515	1120.44	84.4953	1120.44	77.4018
1120.92	48.7022	1120.92	80.6423	1120.92	84.4901	1120.92	77.393
1121.4	48.7115	1121.4	80.6343	1121.4	84.4876	1121.4	77.3828
1121.88	48.7202	1121.88	80.6265	1121.88	84.4856	1121.88	77.3701
1122.37	48.727	1122.37	80.6175	1122.37	84.4818	1122.37	77.3537
1122.85	48.7313	1122.85	80.6063	1122.85	84.4739	1122.85	77.3333
1123.33	48.734	1123.33	80.5928	1123.33	84.4609	1123.33	77.3101
1123.81	48.7364	1123.81	80.5777	1123.81	84.4438	1123.81	77.2866
1124.3	48.7404	1124.3	80.5627	1124.3	84.425	1124.3	77.2663
1124.78	48.7472	1124.78	80.5502	1124.78	84.4082	1124.78	77.2527
1125.26	48.7574	1125.26	80.5426	1125.26	84.3967	1125.26	77.2482
1125.74	48.7711	1125.74	80.5419	1125.74	84.393	1125.74	77.2536
1126.22	48.7883	1126.22	80.5486	1126.22	84.398	1126.22	77.2674
1126.71	48.8088	1126.71	80.5622	1126.71	84.4107	1126.71	77.287
1127.19	48.8327	1127.19	80.5808	1127.19	84.4289	1127.19	77.3084
1127.67	48.8593	1127.67	80.6015	1127.67	84.4493	1127.67	77.328
1128.15	48.8878	1128.15	80.6214	1128.15	84.4688	1128.15	77.3425
1128.63	48.9163	1128.63	80.6379	1128.63	84.4844	1128.63	77.35
1129.12	48.9428	1129.12	80.6489	1129.12	84.4941	1129.12	77.3499
1129.6	48.9654	1129.6	80.6535	1129.6	84.4971	1129.6	77.3428
1130.08	48.983	1130.08	80.651	1130.08	84.4932	1130.08	77.3303
1130.56	48.9956	1130.56	80.6417	1130.56	84.4834	1130.56	77.3146
1131.05	49.0038	1131.05	80.6261	1131.05	84.4691	1131.05	77.2978
1131.53	49.0091	1131.53	80.6051	1131.53	84.4523	1131.53	77.2821
1132.01	49.0127	1132.01	80.5803	1132.01	84.4351	1132.01	77.2686
1132.49	49.0159	1132.49	80.5534	1132.49	84.4198	1132.49	77.2581
1132.97	49.0191	1132.97	80.5266	1132.97	84.4079	1132.97	77.2503
1133.46	49.0229	1133.46	80.5022	1133.46	84.4006	1133.46	77.2444
1133.94	49.0275	1133.94	80.4818	1133.94	84.3981	1133.94	77.2396
1134.42	49.0334	1134.42	80.4661	1134.42	84.3999	1134.42	77.2353
1134.9	49.0408	1134.9	80.455	1134.9	84.405	1134.9	77.2313
1135.38	49.0499	1135.38	80.4476	1135.38	84.412	1135.38	77.2283
1135.87	49.0602	1135.87	80.4427	1135.87	84.4196	1135.87	77.227
1136.35	49.071	1136.35	80.4394	1136.35	84.4267	1136.35	77.2285
1136.83	49.0816	1136.83	80.4374	1136.83	84.4329	1136.83	77.2333
1137.31	49.0915	1137.31	80.4374	1137.31	84.4381	1137.31	77.2411
1137.8	49.1012	1137.8	80.4396	1137.8	84.4425	1137.8	77.251
1138.28	49.1113	1138.28	80.4444	1138.28	84.4463	1138.28	77.261
1138.76	49.1229	1138.76	80.4512	1138.76	84.4495	1138.76	77.2694
1139.24	49.1364	1139.24	80.4586	1139.24	84.4517	1139.24	77.2745
1139.72	49.1519	1139.72	80.4647	1139.72	84.4525	1139.72	77.2752
1140.21	49.1686	1140.21	80.4682	1140.21	84.4516	1140.21	77.2716
1140.69	49.1854	1140.69	80.4686	1140.69	84.4491	1140.69	77.2647
1141.17	49.2013	1141.17	80.4665	1141.17	84.4458	1141.17	77.2559
1141.65	49.2162	1141.65	80.4636	1141.65	84.4428	1141.65	77.247
1142.13	49.2302	1142.13	80.4618	1142.13	84.4413	1142.13	77.2392
1142.62	49.2438	1142.62	80.4621	1142.62	84.4419	1142.62	77.2331
1143.1	49.2575	1143.1	80.4645	1143.1	84.4445	1143.1	77.2283
1143.58	49.2706	1143.58	80.4674	1143.58	84.4481	1143.58	77.2238
1144.06	49.2823	1144.06	80.4687	1144.06	84.4509	1144.06	77.2184
1144.55	49.2915	1144.55	80.4662	1144.55	84.4511	1144.55	77.211
1145.03	49.2973	1145.03	80.4586	1145.03	84.4473	1145.03	77.2013
1145.51	49.3002	1145.51	80.4463	1145.51	84.4391	1145.51	77.1894
1145.99	49.3012	1145.99	80.4308	1145.99	84.4268	1145.99	77.1763
1146.47	49.302	1146.47	80.4144	1146.47	84.4118	1146.47	77.1625
1146.96	49.304	1146.96	80.3992	1146.96	84.3959	1146.96	77.1489
1147.44	49.3078	1147.44	80.3863	1147.44	84.3806	1147.44	77.1355
1147.92	49.3131	1147.92	80.3761	1147.92	84.3674	1147.92	77.1223
1148.4	49.3189	1148.4	80.3675	1148.4	84.3571	1148.4	77.1093
1148.88	49.3244	1148.88	80.3594	1148.88	84.3504	1148.88	77.0968
1149.37	49.3297	1149.37	80.3509	1149.37	84.3475	1149.37	77.0858
1149.85	49.3357	1149.85	80.3418	1149.85	84.3485	1149.85	77.0776
1150.33	49.344	1150.33	80.3327	1150.33	84.3533	1150.33	77.0738
1150.81	49.3559	1150.81	80.3248	1150.81	84.3614	1150.81	77.0753
1151.3	49.3722	1151.3	80.3194	1151.3	84.3718	1151.3	77.082
1151.78	49.3924	1151.78	80.3178	1151.78	84.3837	1151.78	77.0931
1152.26	49.4149	1152.26	80.3202	1152.26	84.3956	1152.26	77.1068
1152.74	49.4381	1152.74	80.3266	1152.74	84.4067	1152.74	77.1215
1153.22	49.4603	1153.22	80.3359	1153.22	84.4162	1153.22	77.1356
1153.7	49.481	1153.7	80.3467	1153.7	84.4235	1153.7	77.1479
1154.19	49.4999	1154.19	80.3573	1154.19	84.4282	1154.19	77.1581
1154.67	49.5174	1154.67	80.3661	1154.67	84.43	1154.67	77.1655
1155.15	49.5334	1155.15	80.3717	1155.15	84.4281	1155.15	77.1699
1155.63	49.5475	1155.63	80.3734	1155.63	84.4223	1155.63	77.1709
1156.12	49.5592	1156.12	80.3711	1156.12	84.4127	1156.12	77.1683
1156.6	49.5681	1156.6	80.3657	1156.6	84.4002	1156.6	77.1627
1157.08	49.5745	1157.08	80.3584	1157.08	84.3867	1157.08	77.1555
1157.56	49.5795	1157.56	80.3508	1157.56	84.3745	1157.56	77.1487
1158.04	49.5847	1158.04	80.3439	1158.04	84.3661	1158.04	77.1447
1158.53	49.5917	1158.53	80.3385	1158.53	84.3629	1158.53	77.1449
1159.01	49.601	1159.01	80.3347	1159.01	84.3654	1159.01	77.1497
1159.49	49.6125	1159.49	80.3321	1159.49	84.3724	1159.49	77.1577
1159.97	49.625	1159.97	80.3303	1159.97	84.382	1159.97	77.1663
1160.45	49.6376	1160.45	80.3293	1160.45	84.3921	1160.45	77.1728
1160.94	49.6495	1160.94	80.3295	1160.94	84.4012	1160.94	77.1753
1161.42	49.6614	1161.42	80.3315	1161.42	84.4089	1161.42	77.1735
1161.9	49.6743	1161.9	80.3355	1161.9	84.4159	1161.9	77.1687
1162.38	49.6894	1162.38	80.3415	1162.38	84.4233	1162.38	77.1635
1162.87	49.707	1162.87	80.3481	1162.87	84.4318	1162.87	77.1601
1163.35	49.7265	1163.35	80.3535	1163.35	84.4415	1163.35	77.1602
1163.83	49.746	1163.83	80.3557	1163.83	84.4513	1163.83	77.1635
1164.31	49.7633	1164.31	80.353	1164.31	84.4599	1164.31	77.1689
1164.79	49.7765	1164.79	80.3451	1164.79	84.4657	1164.79	77.1744
1165.28	49.7852	1165.28	80.3328	1165.28	84.4678	1165.28	77.1786
1165.76	49.7901	1165.76	80.3181	1165.76	84.4665	1165.76	77.1809
1166.24	49.7927	1166.24	80.3036	1166.24	84.4627	1166.24	77.1818
1166.72	49.7951	1166.72	80.2914	1166.72	84.4577	1166.72	77.1821
1167.2	49.7982	1167.2	80.2829	1167.2	84.4524	1167.2	77.1824
1167.69	49.8026	1167.69	80.278	1167.69	84.447	1167.69	77.1823
1168.17	49.8075	1168.17	80.2755	1168.17	84.4414	1168.17	77.1808
1168.65	49.812	1168.65	80.274	1168.65	84.4349	1168.65	77.1761
1169.13	49.8156	1169.13	80.2717	1169.13	84.427	1169.13	77.167
1169.62	49.8182	1169.62	80.2677	1169.62	84.4176	1169.62	77.1535
1170.1	49.8204	1170.1	80.262	1170.1	84.4073	1170.1	77.1368
1170.58	49.8229	1170.58	80.255	1170.58	84.3967	1170.58	77.1192
1171.06	49.8264	1171.06	80.2476	1171.06	84.3868	1171.06	77.1033
1171.54	49.8312	1171.54	80.2407	1171.54	84.378	1171.54	77.0911
1172.03	49.8371	1172.03	80.2343	1172.03	84.3705	1172.03	77.0835
1172.51	49.8438	1172.51	80.2285	1172.51	84.3643	1172.51	77.0801
1172.99	49.851	1172.99	80.2229	1172.99	84.3593	1172.99	77.0797
1173.47	49.8586	1173.47	80.2171	1173.47	84.3553	1173.47	77.0808
1173.95	49.8667	1173.95	80.2108	1173.95	84.3524	1173.95	77.0822
1174.44	49.8755	1174.44	80.2045	1174.44	84.3502	1174.44	77.0834
1174.92	49.8848	1174.92	80.1988	1174.92	84.3486	1174.92	77.0846
1175.4	49.8949	1175.4	80.1945	1175.4	84.3469	1175.4	77.0865
1175.88	49.9058	1175.88	80.1927	1175.88	84.3452	1175.88	77.0897
1176.37	49.9181	1176.37	80.1942	1176.37	84.3439	1176.37	77.0953
1176.85	49.9325	1176.85	80.1997	1176.85	84.3444	1176.85	77.1038
1177.33	49.9501	1177.33	80.2094	1177.33	84.3486	1177.33	77.1158
1177.81	49.9714	1177.81	80.2232	1177.81	84.3587	1177.81	77.1313
1178.29	49.9962	1178.29	80.2399	1178.29	84.3761	1178.29	77.1499
1178.78	50.0234	1178.78	80.258	1178.78	84.4007	1178.78	77.1704
1179.26	50.0506	1179.26	80.2753	1179.26	84.4304	1179.26	77.1908
1179.74	50.0753	1179.74	80.2895	1179.74	84.4618	1179.74	77.2085
1180.22	50.0956	1180.22	80.2984	1180.22	84.4905	1180.22	77.2212
1180.7	50.1101	1180.7	80.3009	1180.7	84.5131	1180.7	77.2271
1181.19	50.1194	1181.19	80.2971	1181.19	84.5272	1181.19	77.226
1181.67	50.1249	1181.67	80.2885	1181.67	84.5329	1181.67	77.2189
1182.15	50.1287	1182.15	80.2776	1182.15	84.5318	1182.15	77.2084
1182.63	50.1329	1182.63	80.267	1182.63	84.5265	1182.63	77.1975
1183.11	50.1388	1183.11	80.2591	1183.11	84.5194	1183.11	77.1886
1183.6	50.147	1183.6	80.2547	1183.6	84.5122	1183.6	77.1834
1184.08	50.1574	1184.08	80.2535	1184.08	84.5051	1184.08	77.1824
1184.56	50.1695	1184.56	80.2543	1184.56	84.4982	1184.56	77.1848
1185.04	50.1825	1185.04	80.255	1185.04	84.4908	1185.04	77.1894
1185.53	50.1961	1185.53	80.2541	1185.53	84.4829	1185.53	77.1949
1186.01	50.2101	1186.01	80.2517	1186.01	84.4756	1186.01	77.2006
1186.49	50.2249	1186.49	80.2491	1186.49	84.4704	1186.49	77.2061
1186.97	50.2407	1186.97	80.2484	1186.97	84.4692	1186.97	77.212
1187.45	50.2577	1187.45	80.252	1187.45	84.4733	1187.45	77.2187
1187.94	50.2758	1187.94	80.2612	1187.94	84.4827	1187.94	77.2266
1188.42	50.2946	1188.42	80.2759	1188.42	84.4964	1188.42	77.236
1188.9	50.3137	1188.9	80.2945	1188.9	84.5126	1188.9	77.2469
1189.38	50.3326	1189.38	80.3146	1189.38	84.529	1189.38	77.2592
1189.86	50.3509	1189.86	80.3336	1189.86	84.5442	1189.86	77.2727
1190.35	50.3683	1190.35	80.3495	1190.35	84.5571	1190.35	77.287
1190.83	50.3847	1190.83	80.3611	1190.83	84.5673	1190.83	77.3012
1191.31	50.3997	1191.31	80.3683	1191.31	84.5746	1191.31	77.314
1191.79	50.4129	1191.79	80.3708	1191.79	84.5789	1191.79	77.3235
1192.28	50.4239	1192.28	80.3685	1192.28	84.5797	1192.28	77.3278
1192.76	50.4321	1192.76	80.3615	1192.76	84.5766	1192.76	77.3256
1193.24	50.4371	1193.24	80.3497	1193.24	84.5693	1193.24	77.3165
1193.72	50.4391	1193.72	80.3342	1193.72	84.5585	1193.72	77.3015
1194.2	50.4386	1194.2	80.3169	1194.2	84.5459	1194.2	77.2833
1194.68	50.4369	1194.68	80.3009	1194.68	84.534	1194.68	77.2654
1195.17	50.4359	1195.17	80.2898	1195.17	84.5257	1195.17	77.2514
1195.65	50.4375	1195.65	80.2866	1195.65	84.5238	1195.65	77.2446
1196.13	50.4433	1196.13	80.2928	1196.13	84.5299	1196.13	77.2468
1196.61	50.4542	1196.61	80.3078	1196.61	84.5445	1196.61	77.2583
1197.1	50.47	1197.1	80.3292	1197.1	84.566	1197.1	77.2773
1197.58	50.4892	1197.58	80.3528	1197.58	84.5915	1197.58	77.3011
1198.06	50.5097	1198.06	80.3745	1198.06	84.6173	1198.06	77.3261
1198.54	50.529	1198.54	80.3907	1198.54	84.6393	1198.54	77.3485
1199.02	50.545	1199.02	80.3991	1199.02	84.6542	1199.02	77.3652
1199.51	50.5564	1199.51	80.3993	1199.51	84.6599	1199.51	77.3741
1199.99	50.563	1199.99	80.392	1199.99	84.656	1199.99	77.3745
1200.47	50.5656	1200.47	80.3791	1200.47	84.6442	1200.47	77.3674
1200.95	50.5657	1200.95	80.3626	1200.95	84.6275	1200.95	77.3549
1201.43	50.5652	1201.43	80.345	1201.43	84.6096	1201.43	77.34
1201.92	50.5657	1201.92	80.3285	1201.92	84.5946	1201.92	77.3264
1202.4	50.5688	1202.4	80.3152	1202.4	84.5854	1202.4	77.3171
1202.88	50.5755	1202.88	80.3065	1202.88	84.5832	1202.88	77.3146
1203.36	50.5864	1203.36	80.3034	1203.36	84.588	1203.36	77.3197
1203.85	50.6019	1203.85	80.3057	1203.85	84.5981	1203.85	77.3318
1204.33	50.6215	1204.33	80.3122	1204.33	84.6108	1204.33	77.3491
1204.81	50.6443	1204.81	80.321	1204.81	84.6236	1204.81	77.3689
1205.29	50.6688	1205.29	80.3297	1205.29	84.6343	1205.29	77.3884
1205.77	50.6931	1205.77	80.3362	1205.77	84.6417	1205.77	77.4051
1206.26	50.7154	1206.26	80.3394	1206.26	84.6456	1206.26	77.4177
1206.74	50.7342	1206.74	80.339	1206.74	84.6464	1206.74	77.4254
1207.22	50.7488	1207.22	80.3352	1207.22	84.6451	1207.22	77.4287
1207.7	50.7593	1207.7	80.3289	1207.7	84.6424	1207.7	77.4284
1208.18	50.7663	1208.18	80.3209	1208.18	84.6392	1208.18	77.4255
1208.67	50.7714	1208.67	80.3115	1208.67	84.636	1208.67	77.421
1209.15	50.7759	1209.15	80.3012	1209.15	84.6331	1209.15	77.4156
1209.63	50.7812	1209.63	80.2904	1209.63	84.6308	1209.63	77.4097
1210.11	50.7882	1210.11	80.2799	1210.11	84.6292	1210.11	77.4037
1210.6	50.7971	1210.6	80.2708	1210.6	84.628	1210.6	77.3978
1211.08	50.8079	1211.08	80.2641	1211.08	84.627	1211.08	77.3923
1211.56	50.8202	1211.56	80.2604	1211.56	84.6257	1211.56	77.3875
1212.04	50.833	1212.04	80.2597	1212.04	84.6237	1212.04	77.3839
1212.52	50.8455	1212.52	80.261	1212.52	84.6207	1212.52	77.3816
1213.01	50.8567	1213.01	80.2627	1213.01	84.6165	1213.01	77.381
1213.49	50.8661	1213.49	80.2629	1213.49	84.6113	1213.49	77.3819
1213.97	50.8733	1213.97	80.2603	1213.97	84.6051	1213.97	77.3841
1214.45	50.8785	1214.45	80.2543	1214.45	84.5978	1214.45	77.3868
1214.93	50.8818	1214.93	80.2449	1214.93	84.5892	1214.93	77.389
1215.42	50.8837	1215.42	80.2328	1215.42	84.5788	1215.42	77.3899
1215.9	50.8845	1215.9	80.2188	1215.9	84.5664	1215.9	77.3884
1216.38	50.8845	1216.38	80.2037	1216.38	84.5524	1216.38	77.3842
1216.86	50.8841	1216.86	80.1883	1216.86	84.5375	1216.86	77.3777
1217.35	50.8836	1217.35	80.1736	1217.35	84.5238	1217.35	77.37
1217.83	50.8838	1217.83	80.1603	1217.83	84.5131	1217.83	77.363
1218.31	50.8858	1218.31	80.1499	1218.31	84.5076	1218.31	77.3586
1218.79	50.891	1218.79	80.1432	1218.79	84.5084	1218.79	77.3585
1219.27	50.9002	1219.27	80.1407	1219.27	84.5153	1219.27	77.3633
1219.76	50.9137	1219.76	80.1417	1219.76	84.5265	1219.76	77.3723
1220.24	50.9309	1220.24	80.1449	1220.24	84.5395	1220.24	77.3838
1220.72	50.9504	1220.72	80.1483	1220.72	84.5512	1220.72	77.3953
1221.2	50.9704	1221.2	80.1503	1221.2	84.559	1221.2	77.4046
1221.68	50.9892	1221.68	80.1502	1221.68	84.5619	1221.68	77.4105
1222.17	51.0059	1222.17	80.1487	1222.17	84.5599	1222.17	77.4133
1222.65	51.0204	1222.65	80.1473	1222.65	84.5549	1222.65	77.4147
1223.13	51.0334	1223.13	80.148	1223.13	84.5492	1223.13	77.4173
1223.61	51.0457	1223.61	80.1523	1223.61	84.5451	1223.61	77.4232
1224.09	51.058	1224.09	80.1602	1224.09	84.5441	1224.09	77.4334
1224.58	51.0701	1224.58	80.1703	1224.58	84.5462	1224.58	77.447
1225.06	51.0815	1225.06	80.1802	1225.06	84.5505	1225.06	77.4616
1225.54	51.0911	1225.54	80.1873	1225.54	84.5553	1225.54	77.4742
1226.02	51.0983	1226.02	80.1896	1226.02	84.5586	1226.02	77.482
1226.51	51.1032	1226.51	80.1866	1226.51	84.5591	1226.51	77.4835
1226.99	51.1063	1226.99	80.1789	1226.99	84.5565	1226.99	77.4794
1227.47	51.109	1227.47	80.1682	1227.47	84.5512	1227.47	77.4717
1227.95	51.1126	1227.95	80.1563	1227.95	84.5447	1227.95	77.4639
1228.43	51.118	1228.43	80.1453	1228.43	84.5384	1228.43	77.459
1228.91	51.126	1228.91	80.1366	1228.91	84.5337	1228.91	77.4594
1229.4	51.1366	1229.4	80.1314	1229.4	84.5318	1229.4	77.466
1229.88	51.1497	1229.88	80.1303	1229.88	84.5334	1229.88	77.4788
1230.36	51.165	1230.36	80.1338	1230.36	84.5387	1230.36	77.4967
1230.84	51.1822	1230.84	80.1414	1230.84	84.5481	1230.84	77.5185
1231.33	51.2007	1231.33	80.1518	1231.33	84.5613	1231.33	77.543
1231.81	51.2194	1231.81	80.1626	1231.81	84.5782	1231.81	77.5686
1232.29	51.2369	1232.29	80.1707	1232.29	84.5979	1232.29	77.5937
1232.77	51.2512	1232.77	80.1732	1232.77	84.6191	1232.77	77.616
1233.26	51.2608	1233.26	80.1685	1233.26	84.6398	1233.26	77.6331
1233.74	51.2649	1233.74	80.157	1233.74	84.6576	1233.74	77.6426
1234.22	51.2638	1234.22	80.1416	1234.22	84.6704	1234.22	77.643
1234.7	51.2592	1234.7	80.127	1234.7	84.6767	1234.7	77.634
1235.18	51.2533	1235.18	80.118	1235.18	84.6761	1235.18	77.6171
1235.66	51.2488	1235.66	80.119	1235.66	84.6692	1235.66	77.595
1236.15	51.2474	1236.15	80.1314	1236.15	84.6579	1236.15	77.5709
1236.63	51.2501	1236.63	80.1542	1236.63	84.645	1236.63	77.5481
1237.11	51.2567	1237.11	80.1838	1237.11	84.6333	1237.11	77.5287
1237.59	51.2662	1237.59	80.2158	1237.59	84.625	1237.59	77.5138
1238.08	51.2773	1238.08	80.2462	1238.08	84.6221	1238.08	77.5034
1238.56	51.2891	1238.56	80.2722	1238.56	84.6253	1238.56	77.4972
1239.04	51.3008	1239.04	80.2933	1239.04	84.6347	1239.04	77.4946
1239.52	51.3122	1239.52	80.3105	1239.52	84.6497	1239.52	77.4954
1240	51.3234	1240	80.3255	1240	84.6691	1240	77.4995
1240.49	51.3344	1240.49	80.3402	1240.49	84.6915	1240.49	77.5067
1240.97	51.3452	1240.97	80.3557	1240.97	84.7154	1240.97	77.5165
1241.45	51.3559	1241.45	80.3726	1241.45	84.7397	1241.45	77.5279
1241.93	51.367	1241.93	80.3911	1241.93	84.7637	1241.93	77.5397
1242.41	51.3787	1242.41	80.4114	1242.41	84.7871	1242.41	77.551
1242.9	51.3916	1242.9	80.4338	1242.9	84.8105	1242.9	77.5612
1243.38	51.4061	1243.38	80.4584	1243.38	84.8341	1243.38	77.5699
1243.86	51.4219	1243.86	80.4851	1243.86	84.8585	1243.86	77.5772
1244.34	51.4387	1244.34	80.513	1244.34	84.8837	1244.34	77.5832
1244.83	51.4553	1244.83	80.5402	1244.83	84.9087	1244.83	77.5874
1245.31	51.471	1245.31	80.5647	1245.31	84.9324	1245.31	77.5891
1245.79	51.4849	1245.79	80.5849	1245.79	84.9534	1245.79	77.5876
1246.27	51.4971	1246.27	80.5998	1246.27	84.9707	1246.27	77.5825
1246.75	51.5078	1246.75	80.6099	1246.75	84.9845	1246.75	77.5743
1247.24	51.5177	1247.24	80.617	1247.24	84.9959	1247.24	77.5646
1247.72	51.5275	1247.72	80.6234	1247.72	85.0069	1247.72	77.5554
1248.2	51.5373	1248.2	80.6312	1248.2	85.0197	1248.2	77.5491
1248.68	51.5471	1248.68	80.6418	1248.68	85.0358	1248.68	77.5469
1249.16	51.5561	1249.16	80.655	1249.16	85.0553	1249.16	77.5489
1249.65	51.5635	1249.65	80.6694	1249.65	85.0769	1249.65	77.5536
1250.13	51.5687	1250.13	80.6833	1250.13	85.0981	1250.13	77.5587
1250.61	51.5714	1250.61	80.6948	1250.61	85.1162	1250.61	77.5619
1251.09	51.5718	1251.09	80.7029	1251.09	85.1292	1251.09	77.5616
1251.58	51.5707	1251.58	80.7076	1251.58	85.1364	1251.58	77.5574
1252.06	51.5693	1252.06	80.7101	1252.06	85.1387	1252.06	77.5503
1252.54	51.5691	1252.54	80.7118	1252.54	85.1383	1252.54	77.5424
1253.02	51.5714	1253.02	80.7143	1253.02	85.1378	1253.02	77.5357
1253.5	51.5775	1253.5	80.7186	1253.5	85.1396	1253.5	77.5318
1253.98	51.5883	1253.98	80.7253	1253.98	85.1448	1253.98	77.5314
1254.47	51.6038	1254.47	80.7341	1254.47	85.1536	1254.47	77.5343
1254.95	51.6234	1254.95	80.7445	1254.95	85.1651	1254.95	77.5396
1255.43	51.6459	1255.43	80.7554	1255.43	85.1778	1255.43	77.5461
1255.91	51.669	1255.91	80.7657	1255.91	85.1902	1255.91	77.5526
1256.4	51.691	1256.4	80.7741	1256.4	85.2009	1256.4	77.558
1256.88	51.7098	1256.88	80.7797	1256.88	85.2089	1256.88	77.5616
1257.36	51.7243	1257.36	80.7816	1257.36	85.2137	1257.36	77.5628
1257.84	51.7342	1257.84	80.7795	1257.84	85.2151	1257.84	77.5611
1258.33	51.7399	1258.33	80.7739	1258.33	85.2132	1258.33	77.5564
1258.81	51.7423	1258.81	80.7657	1258.81	85.2086	1258.81	77.5487
1259.29	51.7426	1259.29	80.7563	1259.29	85.202	1259.29	77.5382
1259.77	51.7418	1259.77	80.7471	1259.77	85.1943	1259.77	77.5253
1260.25	51.7405	1260.25	80.7389	1260.25	85.1861	1260.25	77.5108
1260.73	51.7391	1260.73	80.7319	1260.73	85.1778	1260.73	77.4952
1261.22	51.7377	1261.22	80.7255	1261.22	85.1692	1261.22	77.4791
1261.7	51.7365	1261.7	80.7186	1261.7	85.16	1261.7	77.4632
1262.18	51.7358	1262.18	80.7105	1262.18	85.15	1262.18	77.4484
1262.66	51.7363	1262.66	80.7011	1262.66	85.1398	1262.66	77.4359
1263.15	51.7388	1263.15	80.691	1263.15	85.1307	1263.15	77.4271
1263.63	51.7443	1263.63	80.6818	1263.63	85.1246	1263.63	77.4231
1264.11	51.7537	1264.11	80.6751	1264.11	85.1233	1264.11	77.425
1264.59	51.7673	1264.59	80.6722	1264.59	85.1279	1264.59	77.4326
1265.07	51.7848	1265.07	80.6734	1265.07	85.1381	1265.07	77.4453
1265.56	51.805	1265.56	80.6783	1265.56	85.1522	1265.56	77.4611
1266.04	51.8262	1266.04	80.6853	1266.04	85.1674	1266.04	77.4779
1266.52	51.846	1266.52	80.6931	1266.52	85.1805	1266.52	77.4935
1267	51.8623	1267	80.7004	1267	85.1894	1267	77.5063
1267.48	51.874	1267.48	80.7065	1267.48	85.193	1267.48	77.5156
1267.97	51.8806	1267.97	80.7114	1267.97	85.1922	1267.97	77.5216
1268.45	51.8832	1268.45	80.7148	1268.45	85.1887	1268.45	77.525
1268.93	51.8834	1268.93	80.7165	1268.93	85.1845	1268.93	77.5267
1269.41	51.8833	1269.41	80.7158	1269.41	85.1812	1269.41	77.5271
1269.89	51.8843	1269.89	80.7115	1269.89	85.1791	1269.89	77.5262
1270.38	51.8871	1270.38	80.7027	1270.38	85.1773	1270.38	77.5235
1270.86	51.8915	1270.86	80.6891	1270.86	85.1746	1270.86	77.5188
1271.34	51.8965	1271.34	80.6719	1271.34	85.1698	1271.34	77.5119
1271.82	51.9013	1271.82	80.6529	1271.82	85.1623	1271.82	77.5032
1272.31	51.9053	1272.31	80.6348	1272.31	85.1526	1272.31	77.4938
1272.79	51.9086	1272.79	80.6204	1272.79	85.1419	1272.79	77.4848
1273.27	51.9122	1273.27	80.6111	1273.27	85.132	1273.27	77.4774
1273.75	51.9168	1273.75	80.6072	1273.75	85.1241	1273.75	77.4721
1274.23	51.9231	1274.23	80.6077	1274.23	85.1189	1274.23	77.4691
1274.72	51.9313	1274.72	80.6105	1274.72	85.1165	1274.72	77.4681
1275.2	51.9407	1275.2	80.6137	1275.2	85.1164	1275.2	77.4684
1275.68	51.9508	1275.68	80.6158	1275.68	85.1179	1275.68	77.4696
1276.16	51.9608	1276.16	80.6162	1276.16	85.1205	1276.16	77.4717
1276.64	51.9706	1276.64	80.6154	1276.64	85.1241	1276.64	77.4749
1277.13	51.9805	1277.13	80.6145	1277.13	85.1285	1277.13	77.4798
1277.61	51.9908	1277.61	80.6145	1277.61	85.1336	1277.61	77.4863
1278.09	52.0019	1278.09	80.616	1278.09	85.1392	1278.09	77.4942
1278.57	52.0136	1278.57	80.6188	1278.57	85.1444	1278.57	77.5025
1279.06	52.0253	1279.06	80.6221	1279.06	85.1482	1279.06	77.5097
1279.54	52.0359	1279.54	80.6245	1279.54	85.1491	1279.54	77.5141
1280.02	52.0446	1280.02	80.6249	1280.02	85.146	1280.02	77.5143
1280.5	52.051	1280.5	80.6222	1280.5	85.1383	1280.5	77.5095
1280.98	52.0551	1280.98	80.6159	1280.98	85.1262	1280.98	77.5
1281.47	52.0574	1281.47	80.6064	1281.47	85.1108	1281.47	77.4868
1281.95	52.0585	1281.95	80.5943	1281.95	85.0939	1281.95	77.4717
1282.43	52.0588	1282.43	80.5808	1282.43	85.0777	1282.43	77.4566
1282.91	52.0588	1282.91	80.5673	1282.91	85.0644	1282.91	77.4433
1283.39	52.0584	1283.39	80.555	1283.39	85.0556	1283.39	77.4331
1283.88	52.0582	1283.88	80.5447	1283.88	85.0516	1283.88	77.4268
1284.36	52.0584	1284.36	80.5369	1284.36	85.0519	1284.36	77.4245
1284.84	52.0599	1284.84	80.5315	1284.84	85.0549	1284.84	77.4257
1285.32	52.0636	1285.32	80.5282	1285.32	85.0589	1285.32	77.4299
1285.81	52.0702	1285.81	80.5267	1285.81	85.0624	1285.81	77.4364
1286.29	52.0798	1286.29	80.5263	1286.29	85.0645	1286.29	77.4445
1286.77	52.0922	1286.77	80.5273	1286.77	85.0656	1286.77	77.4538
1287.25	52.1068	1287.25	80.5295	1287.25	85.0665	1287.25	77.4638
1287.73	52.1227	1287.73	80.5333	1287.73	85.0684	1287.73	77.4741
1288.22	52.139	1288.22	80.5384	1288.22	85.072	1288.22	77.4842
1288.7	52.1552	1288.7	80.5445	1288.7	85.077	1288.7	77.4933
1289.18	52.1708	1289.18	80.5506	1289.18	85.0826	1289.18	77.5005
1289.66	52.1857	1289.66	80.5555	1289.66	85.0871	1289.66	77.5049
1290.14	52.1993	1290.14	80.5584	1290.14	85.0893	1290.14	77.5062
1290.63	52.2116	1290.63	80.5587	1290.63	85.0887	1290.63	77.5043
1291.11	52.2225	1291.11	80.5567	1291.11	85.0857	1291.11	77.5001
1291.59	52.2322	1291.59	80.5534	1291.59	85.0819	1291.59	77.4951
1292.07	52.2415	1292.07	80.5497	1292.07	85.079	1292.07	77.4911
1292.56	52.2511	1292.56	80.5467	1292.56	85.0786	1292.56	77.4899
1293.04	52.2618	1293.04	80.5449	1293.04	85.0813	1293.04	77.4924
1293.52	52.2738	1293.52	80.5441	1293.52	85.0867	1293.52	77.4988
1294	52.2865	1294	80.5438	1294	85.0934	1294	77.5079
1294.48	52.299	1294.48	80.5435	1294.48	85.0995	1294.48	77.5179
1294.96	52.31	1294.96	80.5425	1294.96	85.1035	1294.96	77.5267
1295.45	52.3186	1295.45	80.541	1295.45	85.1047	1295.45	77.5327
1295.93	52.3243	1295.93	80.5391	1295.93	85.1031	1295.93	77.5349
1296.41	52.3276	1296.41	80.5371	1296.41	85.0991	1296.41	77.5334
1296.89	52.3291	1296.89	80.5351	1296.89	85.0937	1296.89	77.5291
1297.38	52.33	1297.38	80.5329	1297.38	85.0876	1297.38	77.5232
1297.86	52.3309	1297.86	80.53	1297.86	85.0813	1297.86	77.5167
1298.34	52.3321	1298.34	80.5258	1298.34	85.0748	1298.34	77.5102
1298.82	52.3338	1298.82	80.5202	1298.82	85.0684	1298.82	77.5038
1299.3	52.3358	1299.3	80.5132	1299.3	85.0621	1299.3	77.4973
1299.79	52.3383	1299.79	80.5055	1299.79	85.0563	1299.79	77.4907
1300.27	52.3416	1300.27	80.4979	1300.27	85.0518	1300.27	77.4841
1300.75	52.3464	1300.75	80.4909	1300.75	85.0488	1300.75	77.478
1301.23	52.353	1301.23	80.4851	1301.23	85.0477	1301.23	77.4732
1301.71	52.3612	1301.71	80.4803	1301.71	85.048	1301.71	77.4702
1302.2	52.3705	1302.2	80.4764	1302.2	85.0492	1302.2	77.4692
1302.68	52.3799	1302.68	80.4733	1302.68	85.0504	1302.68	77.4699
1303.16	52.3885	1303.16	80.471	1303.16	85.0508	1303.16	77.4717
1303.64	52.3958	1303.64	80.4698	1303.64	85.0501	1303.64	77.4742
1304.13	52.4019	1304.13	80.4701	1304.13	85.0488	1304.13	77.4771
1304.61	52.4073	1304.61	80.4722	1304.61	85.0476	1304.61	77.4804
1305.09	52.413	1305.09	80.4758	1305.09	85.0474	1305.09	77.4845
1305.57	52.4195	1305.57	80.4805	1305.57	85.049	1305.57	77.4895
1306.05	52.4271	1306.05	80.4854	1306.05	85.0524	1306.05	77.4952
1306.54	52.4357	1306.54	80.4896	1306.54	85.057	1306.54	77.5011
1307.02	52.445	1307.02	80.4925	1307.02	85.0616	1307.02	77.5063
1307.5	52.4545	1307.5	80.494	1307.5	85.0647	1307.5	77.51
1307.98	52.464	1307.98	80.4942	1307.98	85.0652	1307.98	77.512
1308.46	52.4736	1308.46	80.4939	1308.46	85.0627	1308.46	77.5127
1308.95	52.4834	1308.95	80.4935	1308.95	85.0575	1308.95	77.5129
1309.43	52.4933	1309.43	80.4933	1309.43	85.0509	1309.43	77.514
1309.91	52.5027	1309.91	80.4933	1309.91	85.0445	1309.91	77.5166
1310.39	52.5112	1310.39	80.4932	1310.39	85.0395	1310.39	77.521
1310.88	52.5181	1310.88	80.4925	1310.88	85.0368	1310.88	77.5264
1311.36	52.5232	1311.36	80.4911	1311.36	85.0362	1311.36	77.5318
1311.84	52.5269	1311.84	80.4891	1311.84	85.0373	1311.84	77.5363
1312.32	52.53	1312.32	80.4871	1312.32	85.0392	1312.32	77.5395
1312.8	52.5339	1312.8	80.4861	1312.8	85.0414	1312.8	77.542
1313.29	52.5397	1313.29	80.4871	1313.29	85.0441	1313.29	77.5454
1313.77	52.548	1313.77	80.491	1313.77	85.0479	1313.77	77.5514
1314.25	52.5587	1314.25	80.4978	1314.25	85.0538	1314.25	77.5612
1314.73	52.5709	1314.73	80.5069	1314.73	85.0622	1314.73	77.5752
1315.21	52.5835	1315.21	80.5172	1315.21	85.0732	1315.21	77.5923
1315.7	52.5953	1315.7	80.527	1315.7	85.0855	1315.7	77.6105
1316.18	52.6052	1316.18	80.5351	1316.18	85.0978	1316.18	77.6275
1316.66	52.6132	1316.66	80.5406	1316.66	85.1081	1316.66	77.641
1317.14	52.6193	1317.14	80.5436	1317.14	85.1154	1317.14	77.65
1317.62	52.624	1317.62	80.5446	1317.62	85.1193	1317.62	77.6543
1318.11	52.6283	1318.11	80.5446	1318.11	85.1203	1318.11	77.6548
1318.59	52.6326	1318.59	80.5446	1318.59	85.1192	1318.59	77.6527
1319.07	52.6371	1319.07	80.5447	1319.07	85.1169	1319.07	77.649
1319.55	52.6419	1319.55	80.5444	1319.55	85.1137	1319.55	77.6441
1320.04	52.6466	1320.04	80.5427	1320.04	85.1093	1320.04	77.6383
1320.52	52.651	1320.52	80.5389	1320.52	85.1034	1320.52	77.6313
1321	52.6552	1321	80.5328	1321	85.096	1321	77.6237
1321.48	52.6594	1321.48	80.5252	1321.48	85.0876	1321.48	77.6163
1321.96	52.6645	1321.96	80.5179	1321.96	85.0796	1321.96	77.6105
1322.45	52.6711	1322.45	80.5135	1322.45	85.0741	1322.45	77.6078
1322.93	52.6801	1322.93	80.5137	1322.93	85.0725	1322.93	77.6095
1323.41	52.6914	1323.41	80.5195	1323.41	85.0756	1323.41	77.6157
1323.89	52.7047	1323.89	80.5303	1323.89	85.0831	1323.89	77.6256
1324.38	52.7186	1324.38	80.5446	1324.38	85.0936	1324.38	77.6376
1324.86	52.7317	1324.86	80.56	1324.86	85.1054	1324.86	77.6498
1325.34	52.7429	1325.34	80.5745	1325.34	85.1171	1325.34	77.6606
1325.82	52.7516	1325.82	80.587	1325.82	85.1277	1325.82	77.6695
1326.3	52.758	1326.3	80.5972	1326.3	85.1374	1326.3	77.6767
1326.79	52.7631	1326.79	80.6056	1326.79	85.1463	1326.79	77.6829
1327.27	52.7681	1327.27	80.6126	1327.27	85.1547	1327.27	77.6887
1327.75	52.7739	1327.75	80.6181	1327.75	85.1619	1327.75	77.6945
1328.23	52.7805	1328.23	80.6214	1328.23	85.1666	1328.23	77.6994
1328.71	52.7873	1328.71	80.6214	1328.71	85.1676	1328.71	77.7023
1329.2	52.7931	1329.2	80.6174	1329.2	85.1639	1329.2	77.7021
1329.68	52.7972	1329.68	80.6095	1329.68	85.1563	1329.68	77.6983
1330.16	52.7995	1330.16	80.5993	1330.16	85.1463	1330.16	77.6918
1330.64	52.8007	1330.64	80.5888	1330.64	85.1367	1330.64	77.6842
1331.12	52.8021	1331.12	80.5805	1331.12	85.1304	1331.12	77.6777
1331.61	52.8053	1331.61	80.5761	1331.61	85.1293	1331.61	77.6747
1332.09	52.811	1332.09	80.5764	1332.09	85.1337	1332.09	77.6762
1332.57	52.8191	1332.57	80.5805	1332.57	85.1425	1332.57	77.6821
1333.05	52.8285	1333.05	80.587	1333.05	85.1537	1333.05	77.6912
1333.54	52.8377	1333.54	80.594	1333.54	85.1649	1333.54	77.7015
1334.02	52.8452	1334.02	80.6002	1334.02	85.1743	1334.02	77.7111
1334.5	52.8505	1334.5	80.6049	1334.5	85.1814	1334.5	77.7188
1334.98	52.8541	1334.98	80.6078	1334.98	85.1862	1334.98	77.7242
1335.46	52.8569	1335.46	80.6091	1335.46	85.1895	1335.46	77.7281
1335.94	52.8601	1335.94	80.6088	1335.94	85.1919	1335.94	77.7314
1336.43	52.865	1336.43	80.607	1336.43	85.1936	1336.43	77.7353
1336.91	52.872	1336.91	80.6036	1336.91	85.1946	1336.91	77.7404
1337.39	52.8809	1337.39	80.5993	1337.39	85.1948	1337.39	77.747
1337.87	52.8916	1337.87	80.5952	1337.87	85.1945	1337.87	77.755
1338.36	52.9038	1338.36	80.5927	1338.36	85.1946	1338.36	77.7637
1338.84	52.9174	1338.84	80.5936	1338.84	85.1962	1338.84	77.7728
1339.32	52.9325	1339.32	80.5988	1339.32	85.2001	1339.32	77.7818
1339.8	52.9488	1339.8	80.6081	1339.8	85.2069	1339.8	77.7902
1340.28	52.9657	1340.28	80.6202	1340.28	85.216	1340.28	77.7978
1340.77	52.9818	1340.77	80.6327	1340.77	85.2261	1340.77	77.8042
1341.25	52.996	1341.25	80.6435	1341.25	85.2357	1341.25	77.8094
1341.73	53.0073	1341.73	80.6513	1341.73	85.2433	1341.73	77.8133
1342.21	53.0153	1342.21	80.656	1342.21	85.2481	1342.21	77.8162
1342.69	53.0207	1342.69	80.6585	1342.69	85.2498	1342.69	77.818
1343.18	53.0245	1343.18	80.6603	1343.18	85.2491	1343.18	77.8191
1343.66	53.028	1343.66	80.6627	1343.66	85.2464	1343.66	77.8194
1344.14	53.0321	1344.14	80.6661	1344.14	85.2428	1344.14	77.819
1344.62	53.0374	1344.62	80.6704	1344.62	85.2387	1344.62	77.8177
1345.11	53.0438	1345.11	80.6749	1345.11	85.2347	1345.11	77.8159
1345.59	53.0508	1345.59	80.6789	1345.59	85.2315	1345.59	77.8143
1346.07	53.0584	1346.07	80.682	1346.07	85.2297	1346.07	77.8139
1346.55	53.0663	1346.55	80.6847	1346.55	85.2303	1346.55	77.8163
1347.03	53.0746	1347.03	80.6876	1347.03	85.2338	1347.03	77.8225
1347.52	53.0834	1347.52	80.6916	1347.52	85.2403	1347.52	77.833
1348	53.0925	1348	80.6971	1348	85.2494	1348	77.8473
1348.48	53.1013	1348.48	80.7039	1348.48	85.2598	1348.48	77.8638
1348.96	53.109	1348.96	80.7112	1348.96	85.2699	1348.96	77.8802
1349.44	53.1148	1349.44	80.7178	1349.44	85.278	1349.44	77.8939
1349.93	53.1185	1349.93	80.723	1349.93	85.2828	1349.93	77.903
1350.41	53.1203	1350.41	80.7259	1350.41	85.2835	1350.41	77.9067
1350.89	53.1211	1350.89	80.7267	1350.89	85.2805	1350.89	77.9052
1351.37	53.1222	1351.37	80.7258	1351.37	85.2746	1351.37	77.8997
1351.86	53.1246	1351.86	80.724	1351.86	85.2673	1351.86	77.8919
1352.34	53.129	1352.34	80.7224	1352.34	85.2604	1352.34	77.8835
1352.82	53.1356	1352.82	80.7221	1352.82	85.2556	1352.82	77.876
1353.3	53.1442	1353.3	80.724	1353.3	85.2543	1353.3	77.8706
1353.78	53.1546	1353.78	80.7289	1353.78	85.2571	1353.78	77.8679
1354.27	53.1664	1354.27	80.7368	1354.27	85.2639	1354.27	77.8682
1354.75	53.1793	1354.75	80.7474	1354.75	85.2735	1354.75	77.8714
1355.23	53.1929	1355.23	80.7595	1355.23	85.284	1355.23	77.8769
1355.71	53.2062	1355.71	80.7714	1355.71	85.2927	1355.71	77.8835
1356.19	53.2185	1356.19	80.7813	1356.19	85.2976	1356.19	77.8899
1356.68	53.2286	1356.68	80.7875	1356.68	85.2969	1356.68	77.8948
1357.16	53.2358	1357.16	80.7895	1357.16	85.2907	1357.16	77.8972
1357.64	53.2402	1357.64	80.7873	1357.64	85.2801	1357.64	77.8972
1358.12	53.2422	1358.12	80.7818	1358.12	85.2674	1358.12	77.8954
1358.61	53.2431	1358.61	80.7743	1358.61	85.2553	1358.61	77.8932
1359.09	53.2439	1359.09	80.7661	1359.09	85.2462	1359.09	77.8921
1359.57	53.2457	1359.57	80.758	1359.57	85.2411	1359.57	77.893
1360.05	53.2486	1360.05	80.7503	1360.05	85.2403	1360.05	77.8961
1360.53	53.2525	1360.53	80.7431	1360.53	85.2424	1360.53	77.9008
1361.02	53.2568	1361.02	80.7364	1361.02	85.2461	1361.02	77.9061
1361.5	53.2608	1361.5	80.7305	1361.5	85.2498	1361.5	77.9111
1361.98	53.2646	1361.98	80.7265	1361.98	85.2529	1361.98	77.9154
1362.46	53.2684	1362.46	80.7255	1362.46	85.2559	1362.46	77.9193
[truncated: 5,471 more rows]

## Sheet: Fig2(c)
Raman shift	Intensity	Raman shift	Intensity	Raman shift	Intensity	Raman shift	Intensity
cm-1		cm-1		cm-1		cm-1
	SN-800		SN-1300		SN-1450		SN-1550
4002.43	0.0885627	4002.15	0.107652	4002.15	0.109634	4002.15	0.160005
4001.28	0.0917466	4001.18	0.130067	4001.18	0.236817	4001.18	0.148787
4000.14	0.105714	4000.21	0.112463	4000.21	0.186501	4000.21	0.137529
3998.99	0.100579	3999.23	0.114767	3999.23	0.114079	3999.23	0.11506
3997.84	0.106902	3998.26	0.0424146	3998.26	0.17333	3998.26	0.204723
3996.69	0.0890421	3997.29	0.0845452	3997.29	0.174645	3997.29	0.137408
3995.55	0.0839131	3996.32	0.106748	3996.32	0.177013	3996.32	0.170995
3994.4	0.074333	3995.34	0.106573	3995.34	0.082531	3995.34	0.204572
3993.25	0.0965565	3994.37	0.0616238	3994.37	0.202792	3994.37	0.126082
3992.1	0.0914287	3993.4	0.111181	3993.4	0.148326	3993.4	0.148452
3990.95	0.100926	3992.42	0.0985638	3992.42	0.119128	3992.42	0.159611
3989.8	0.0894424	3991.45	0.105845	3991.45	0.0867868	3991.45	0.137167
3988.65	0.0925808	3990.47	0.0932274	3990.47	0.231157	3990.47	0.125928
3987.5	0.0861866	3989.5	0.0831081	3989.5	0.110468	3989.5	0.170677
3986.35	0.108383	3988.53	0.112747	3988.53	0.101272	3988.53	0.181827
3985.2	0.0956367	3987.55	0.0380323	3987.55	0.168826	3987.55	0.11462
3984.05	0.102582	3986.58	0.0949974	3986.58	0.148065	3986.58	0.148158
3982.9	0.0866664	3985.6	0.0575621	3985.6	0.125203	3985.6	0.114547
3981.75	0.103768	3984.63	0.0921496	3984.63	0.167506	3984.63	0.181638
3980.6	0.0745294	3983.65	0.0671474	3983.65	0.115224	3983.65	0.170405
3979.45	0.0846462	3982.68	0.124064	3982.68	0.108138	3982.68	0.136806
3978.3	0.0953936	3981.7	0.0444492	3981.7	0.146221	3981.7	0.0808517
3977.15	0.087741	3980.73	0.0790173	3980.73	0.153834	3980.73	0.159088
3976	0.0883362	3979.75	0.108618	3979.75	0.16144	3979.75	0.0696098
3974.84	0.0927359	3978.77	0.118359	3978.77	0.126001	3978.77	0.192534
3973.69	0.10284	3977.8	0.0958548	3977.8	0.106322	3977.8	0.181309
3972.54	0.103432	3976.82	0.0857452	3976.82	0.124431	3976.82	0.181262
3971.39	0.0907146	3975.85	0.0830915	3975.85	0.176113	3975.85	0.15887
3970.23	0.0944768	3974.87	0.122579	3974.87	0.180564	3974.87	0.0806323
3969.08	0.100772	3973.89	0.102563	3973.89	0.135708	3973.89	0.181121
3967.93	0.0886953	3972.92	0.0652054	3972.92	0.129675	3972.92	0.0917367
3966.77	0.0943558	3971.94	0.0724672	3971.94	0.159299	3971.94	0.114034
3965.62	0.104447	3970.96	0.0896349	3970.96	0.116566	3970.96	0.147489
3964.47	0.101243	3969.99	0.0894504	3969.99	0.1682	3969.99	0.169771
3963.31	0.0980397	3969.01	0.0967026	3969.01	0.175793	3969.01	0.169726
3962.16	0.0948356	3968.03	0.094049	3968.03	0.147747	3968.03	0.16968
3961	0.0916306	3967.05	0.0765318	3967.05	0.106084	3967.05	0.147322
3959.85	0.0884251	3966.08	0.106065	3966.08	0.166073	3966.08	0.158435
3958.69	0.0852189	3965.1	0.00439176	3965.1	0.172609	3965.1	0.158391
3957.54	0.099725	3964.12	0.0858939	3964.12	0.0963999	3964.12	0.113742
3956.38	0.0769221	3963.14	0.0238539	3963.14	0.0736238	3963.14	0.191753
3955.23	0.102171	3962.16	0.0979098	3962.16	0.0916877	3962.16	0.169409
3954.07	0.0951768	3961.18	0.102673	3961.18	0.190362	3961.18	0.102486
3952.92	0.0850258	3960.21	0.164325	3960.21	0.100592	3960.21	0.169318
3951.76	0.0969913	3959.23	0.050374	3959.23	0.153185	3959.23	0.124702
3950.6	0.0862118	3958.25	0.109547	3958.25	0.144018	3958.25	0.0800995
3949.45	0.0760677	3957.27	0.072286	3957.27	0.0626621	3957.27	0.158043
3948.29	0.0842398	3956.29	0.0918841	3956.29	0.146621	3956.29	0.135724
3947.13	0.0943026	3955.31	0.155957	3955.31	0.134323	3955.31	0.135685
3945.98	0.0866877	3954.33	0.126113	3954.33	0.133528	3954.33	0.113376
3944.82	0.0967464	3953.35	0.0221548	3953.35	0.134832	3953.35	0.213531
3943.66	0.0733592	3952.37	0.135621	3952.37	0.161222	3952.37	0.124434
3942.5	0.0808931	3951.39	0.0810949	3951.39	0.153109	3951.39	0.0910094
3941.35	0.0877933	3950.41	0.0389343	3950.41	0.109466	3950.41	0.179993
3940.19	0.0940607	3949.43	0.0708687	3949.43	0.12853	3949.43	0.0686923
3939.03	0.0965425	3948.45	0.0706843	3948.45	0.142369	3948.45	0.135405
3937.87	0.0769592	3947.47	0.0828555	3947.47	0.0694953	3947.47	0.157609
3936.71	0.0888975	3946.49	0.102415	3946.49	0.121982	3946.49	0.0908441
3935.55	0.0831865	3945.51	0.0356107	3945.51	0.0606237	3945.51	0.0685745
3934.39	0.0806278	3944.53	0.0921886	3944.53	0.101607	3944.53	0.101895
3933.23	0.0837399	3943.54	0.069801	3943.54	0.184337	3943.54	0.157435
3932.07	0.0893697	3942.56	0.141155	3942.56	0.148046	3942.56	0.101826
3930.91	0.0704391	3941.58	0.0817781	3941.58	0.134728	3941.58	0.16846
3929.75	0.0974754	3940.6	0.0963991	3940.6	0.0786319	3940.6	0.123976
3928.59	0.0697376	3939.62	0.0345818	3939.62	0.113321	3939.62	0.112829
3927.43	0.0860651	3938.63	0.0492029	3938.63	0.128177	3938.63	0.101686
3926.27	0.0841384	3937.65	0.0909269	3937.65	0.157633	3937.65	0.134965
3925.11	0.0828417	3936.67	0.110457	3936.67	0.100525	3936.67	0.101617
3923.95	0.101674	3935.69	0.132447	3935.69	0.124764	3935.69	0.112684
3922.79	0.0764762	3934.71	0.0903833	3934.71	0.153163	3934.71	0.134846
3921.63	0.0758103	3933.72	0.0434006	3933.72	0.0908633	3933.72	0.123708
3920.46	0.0870892	3932.74	0.0555427	3932.74	0.144272	3932.74	0.134766
3919.3	0.10025	3931.76	0.0996875	3931.76	0.157025	3931.76	0.156914
3918.14	0.0807269	3930.77	0.143823	3930.77	0.0728749	3930.77	0.156871
3916.98	0.0926269	3929.79	0.0894808	3929.79	0.126263	3929.79	0.134646
3915.81	0.0850486	3928.81	0.0819178	3928.81	0.131717	3928.81	0.123517
3914.65	0.0636549	3927.82	0.116186	3927.82	0.111139	3927.82	0.145654
3913.49	0.0780633	3926.84	0.118461	3926.84	0.0926491	3926.84	0.145612
3912.32	0.0692362	3925.85	0.182243	3925.85	0.0314763	3925.85	0.245324
3911.16	0.0704557	3924.87	0.0689021	3924.87	0.151443	3924.87	0.178775
3910	0.0785787	3923.89	0.127746	3923.89	0.163135	3923.89	0.145487
3908.83	0.0653636	3922.9	0.0169128	3922.9	0.0780508	3922.9	0.200838
3907.67	0.0828955	3921.92	0.132296	3921.92	0.11992	3921.92	0.101097
3906.5	0.0903844	3920.93	0.043618	3920.93	0.110803	3920.93	0.0678371
3905.34	0.0840733	3919.95	0.0655594	3919.95	0.154737	3919.95	0.101028
3904.17	0.0840347	3918.96	0.0555564	3918.96	0.102981	3918.96	0.211709
3903.01	0.0839961	3917.98	0.040644	3917.98	0.0897163	3917.98	0.100958
3901.84	0.0845843	3916.99	0.0748637	3916.99	0.122194	3916.99	0.111992
3900.68	0.0688782	3916	0.0746794	3916	0.0756626	3916	0.0787562
3899.51	0.0763614	3915.02	0.101521	3915.02	0.164256	3915.02	0.111919
3898.35	0.0838419	3914.03	0.0595923	3914.03	0.100067	3914.03	0.17826
3897.18	0.0681449	3913.05	0.0692363	3913.05	0.0951252	3913.05	0.133969
3896.01	0.0881486	3912.06	0.0518838	3912.06	0.0901801	3912.06	0.089691
3894.85	0.0906138	3911.07	0.103243	3911.07	0.153781	3911.07	0.144947
3893.68	0.0761758	3910.09	0.0785212	3910.09	0.156101	3910.09	0.178073
3892.51	0.0892823	3909.1	0.178935	3909.1	0.187488	3909.1	0.155918
3891.35	0.0798562	3908.11	0.0806217	3908.11	0.141002	3908.11	0.144822
3890.18	0.100465	3907.13	0.168737	3907.13	0.147473	3907.13	0.155832
3889.01	0.0653934	3906.14	0.0287679	3906.14	0.0823292	3906.14	0.166838
3887.84	0.0716125	3905.15	0.0898873	3905.15	0.140685	3905.15	0.166793
3886.67	0.0678243	3904.17	0.163256	3904.17	0.0983904	3904.17	0.0673367
3885.51	0.0884201	3903.18	0.0503117	3903.18	0.117308	3903.18	0.0562637
3884.34	0.0808797	3902.19	0.106502	3902.19	0.147625	3902.19	0.155615
3883.17	0.0677177	3901.2	0.0916191	3901.2	0.148901	3901.2	0.188694
3882	0.0870521	3900.21	0.0644867	3900.21	0.118032	3900.21	0.155529
3880.83	0.0745186	3899.23	0.0618621	3899.23	0.124495	3899.23	0.155486
3879.66	0.0726077	3898.24	0.127813	3898.24	0.082238	3898.24	0.111302
3878.49	0.0800654	3897.25	0.10559	3897.25	0.136377	3897.25	0.0671312
3877.32	0.0775298	3896.26	0.124995	3896.26	0.108635	3896.26	0.133293
3876.15	0.071874	3895.27	0.073403	3895.27	0.127528	3895.27	0.133253
3874.98	0.0693411	3894.28	0.0683287	3894.28	0.189916	3894.28	0.177327
3873.81	0.0905226	3893.29	0.0534648	3893.29	0.113503	3893.29	0.133173
3872.64	0.0649019	3892.3	0.114458	3892.3	0.090961	3892.3	0.100059
3871.47	0.0779669	3891.31	0.106934	3891.31	0.156431	3891.31	0.177187
3870.3	0.08479	3890.32	0.128769	3890.32	0.179438	3890.32	0.0999901
3869.13	0.0835041	3889.33	0.055216	3889.33	0.113425	3889.33	0.188113
3867.95	0.0709963	3888.34	0.0623715	3888.34	0.137469	3888.34	0.0668668
3866.78	0.0896604	3887.35	0.106207	3887.35	0.160467	3887.35	0.121919
3865.61	0.0721703	3886.36	0.0351322	3886.36	0.0810384	3886.36	0.0998517
3864.44	0.0802346	3885.37	0.0520676	3885.37	0.0864529	3885.37	0.0998173
3863.27	0.0714746	3884.38	0.132543	3884.38	0.132199	3884.38	0.0887717
3862.09	0.0658322	3883.39	0.117689	3883.39	0.197583	3883.39	0.0997483
3860.92	0.0925761	3882.4	0.0833042	3882.4	0.0830426	3882.4	0.0997139
3859.75	0.0763468	3881.41	0.124651	3881.41	0.172186	3881.41	0.209738
3858.57	0.0862702	3880.42	0.104926	3880.42	0.0783609	3880.42	0.154666
3857.4	0.083119	3879.43	0.0778806	3879.43	0.0755017	3879.43	0.0886077
3856.23	0.079969	3878.44	0.0899067	3878.44	0.113974	3878.44	0.0995756
3855.05	0.0724648	3877.44	0.0580006	3877.44	0.182391	3877.44	0.176534
3853.88	0.0792712	3876.45	0.0285346	3876.45	0.0917174	3876.45	0.143496
3852.7	0.0730138	3875.46	0.104014	3875.46	0.127071	3875.46	0.209428
3851.53	0.0698679	3874.47	0.0647874	3874.47	0.146927	3874.47	0.154407
3850.35	0.0580189	3873.48	0.0987651	3873.48	0.132704	3873.48	0.132379
3849.18	0.0735257	3872.48	0.162005	3872.48	0.124674	3872.48	0.176302
3848	0.0778395	3871.49	0.0520629	3871.49	0.135228	3871.49	0.154278
3846.83	0.0722094	3870.5	0.0957817	3870.5	0.127205	3870.5	0.0992998
3845.65	0.0790071	3869.51	0.115109	3869.51	0.0954511	3869.51	0.165177
3844.48	0.0721367	3868.51	0.0198559	3868.51	0.0998093	3868.51	0.0882473
3843.3	0.0839	3867.52	0.158605	3867.52	0.152653	3867.52	0.176069
3842.12	0.0689589	3866.53	0.0487593	3866.53	0.165255	3866.53	0.110142
3840.95	0.0825811	3865.53	0.0583259	3865.53	0.11289	3865.53	0.132063
3839.77	0.0682667	3864.54	0.0727727	3864.54	0.129619	3864.54	0.0881164
3838.59	0.0762983	3863.55	0.053106	3863.55	0.0731546	3863.55	0.110033
3837.42	0.0781226	3862.55	0.0894658	3862.55	0.184702	3862.55	0.0661046
3836.24	0.0600946	3861.56	0.0795403	3861.56	0.0911477	3861.56	0.120932
3835.06	0.0687438	3860.56	0.10858	3860.56	0.0965303	3860.56	0.153804
3833.88	0.0699482	3859.57	0.0694499	3859.57	0.11119	3859.57	0.153761
3832.7	0.0785922	3858.57	0.115512	3858.57	0.0557959	3858.57	0.0879201
3831.53	0.0605776	3857.58	0.105596	3857.58	0.119889	3857.58	0.153675
3830.35	0.0816157	3856.58	0.0956805	3856.58	0.0984955	3856.58	0.0988177
3829.17	0.0784791	3855.59	0.0930657	3855.59	0.174915	3855.59	0.120706
3827.99	0.0635725	3854.59	0.134228	3854.59	0.173073	3854.59	0.164505
3826.81	0.0703511	3853.6	0.0975678	3853.6	0.152711	3853.6	0.16446
3825.63	0.0647412	3852.6	0.128989	3852.6	0.130294	3852.6	0.0986799
3824.45	0.064087	3851.61	0.0996297	3851.61	0.145953	3851.61	0.18628
3823.27	0.0956256	3850.61	0.0897236	3850.61	0.172923	3850.61	0.153374
3822.09	0.0900139	3849.62	0.135728	3849.62	0.0959981	3849.62	0.109528
3820.91	0.0701706	3848.62	0.0480566	3848.62	0.141479	3848.62	0.175186
3819.73	0.0688969	3847.62	0.0600247	3847.62	0.110853	3847.62	0.0875606
3818.55	0.07381	3846.63	0.103579	3846.63	0.0596792	3846.63	0.175093
3817.37	0.0706807	3845.63	0.115537	3845.63	0.190459	3845.63	0.153159
3816.19	0.0669341	3844.63	0.110502	3844.63	0.100228	3844.63	0.131232
3815.01	0.0829738	3843.64	0.0423324	3843.64	0.118957	3843.64	0.142133
3813.82	0.088499	3842.64	0.153833	3842.64	0.0678085	3842.64	0.142091
3812.64	0.0711538	3841.64	0.0929552	3841.64	0.086534	3841.64	0.174861
3811.46	0.0612303	3840.64	0.0903501	3840.64	0.128872	3840.64	0.131074
3810.28	0.0809665	3839.65	0.0416341	3839.65	0.149637	3839.65	0.163835
3809.1	0.0753688	3838.65	0.102114	3838.65	0.103648	3838.65	0.120062
3807.91	0.074714	3837.65	0.10193	3837.65	0.100794	3837.65	0.0981646
3806.73	0.0654147	3836.65	0.101756	3836.65	0.0301926	3836.65	0.119987
3805.55	0.0721706	3835.65	0.00698698	3835.65	0.0848242	3835.65	0.109023
3804.36	0.074603	3834.66	0.062587	3834.66	0.0963446	3834.66	0.229162
3803.18	0.0776516	3833.66	0.0793869	3833.66	0.0504006	3833.66	0.152643
3802	0.0677416	3832.66	0.0476939	3832.66	0.072175	3832.66	0.229052
3800.81	0.0714074	3831.66	0.0717561	3831.66	0.119586	3831.66	0.152558
3799.63	0.0664368	3830.66	0.0836951	3830.66	0.110577	3830.66	0.0324151
3798.44	0.0793516	3829.66	0.0932036	3829.66	0.15489	3829.66	0.119723
3797.26	0.0669823	3828.66	0.100291	3828.66	0.169456	3828.66	0.0978553
3796.07	0.0657139	3827.66	0.0904241	3827.66	0.0640918	3827.66	0.163299
3794.89	0.0687602	3826.66	0.0757055	3826.66	0.108388	3826.66	0.130521
3793.7	0.0613294	3825.66	0.0779517	3825.66	0.136277	3825.66	0.141391
3792.52	0.0760817	3824.66	0.157663	3824.66	0.111908	3824.66	0.0540866
3791.33	0.0655725	3823.66	0.0993799	3823.66	0.112128	3823.66	0.0758714
3790.15	0.0778547	3822.66	0.0991957	3822.66	0.0846941	3822.66	0.130363
3788.96	0.0685805	3821.66	0.0675607	3821.66	0.0900398	3821.66	0.152129
3787.77	0.066082	3820.66	0.120604	3820.66	0.108692	3820.66	0.130284
3786.59	0.0623535	3819.66	0.105905	3819.66	0.145768	3819.66	0.119345
3785.4	0.0758579	3818.66	0.0404183	3818.66	0.0221309	3818.66	0.119308
3784.21	0.0770512	3817.66	0.124884	3817.66	0.0387377	3817.66	0.0974783
3783.02	0.0684011	3816.66	0.105353	3816.66	0.103434	3816.66	0.0865497
3781.84	0.065905	3815.66	0.0761675	3815.66	0.0811431	3815.66	0.0865174
3780.65	0.0873933	3814.66	0.0808151	3814.66	0.124333	3814.66	0.206283
3779.46	0.0701381	3813.65	0.0709769	3813.65	0.105113	3813.65	0.184453
3778.27	0.0682576	3812.65	0.0973728	3812.65	0.119646	3812.65	0.119081
3777.08	0.0657633	3811.65	0.0706181	3811.65	0.128045	3811.65	0.195243
3775.9	0.0718728	3810.65	0.0656117	3810.65	0.143594	3810.65	0.195193
3774.71	0.0650781	3809.65	0.135475	3809.65	0.080435	3809.65	0.173379
3773.52	0.0742571	3808.64	0.125627	3808.64	0.167519	3808.64	0.129811
3772.33	0.0723774	3807.64	0.0216207	3807.64	0.104376	3807.64	0.108014
3771.14	0.0668143	3806.64	0.0528291	3806.64	0.0749672	3806.64	0.194995
3769.95	0.064937	3805.63	0.0598976	3805.63	0.104811	3805.63	0.118818
3768.76	0.0839304	3804.63	0.0452371	3804.63	0.0611089	3804.63	0.151401
3767.57	0.0611842	3803.63	0.13193	3803.63	0.104221	3803.63	0.151358
3766.38	0.063604	3802.62	0.0834946	3802.62	0.0993312	3802.62	0.151315
3765.19	0.0752251	3801.62	0.0278359	3801.62	0.119966	3801.62	0.183878
3764	0.0635339	3800.62	0.0807151	3800.62	0.0762926	3800.62	0.129496
3762.81	0.0831231	3799.61	0.0829517	3799.61	0.160193	3799.61	0.0968618
3761.61	0.0665297	3798.61	0.0803564	3798.61	0.144073	3798.61	0.075101
3760.42	0.0511684	3797.61	0.0922373	3797.61	0.0942937	3797.61	0.07507
3759.23	0.0646197	3796.6	0.142667	3796.6	0.164888	3796.6	0.172779
3758.04	0.071938	3795.6	0.0918689	3795.6	0.081464	3795.6	0.118441
3756.85	0.0614857	3794.59	0.130243	3794.59	0.0204979	3794.59	0.118404
3755.65	0.0743152	3793.59	0.0842769	3793.59	0.106368	3793.59	0.0858019
3754.46	0.055292	3792.58	0.0937371	3792.58	0.0576507	3792.58	0.0966223
3753.27	0.0681177	3791.58	0.0766946	3791.58	0.0996606	3791.58	0.118291
3752.08	0.0564493	3790.57	0.0741091	3790.57	0.0713386	3790.57	0.107404
3750.88	0.0674337	3789.57	0.150973	3789.57	0.0817453	3789.57	0.139912
3749.69	0.0680102	3788.56	0.109859	3788.56	0.0768677	3788.56	0.0964858
3748.5	0.073481	3787.55	0.107273	3787.55	0.0872671	3787.55	0.0964517
3747.3	0.0709972	3786.55	0.0493292	3786.55	0.124146	3786.55	0.0964173
3746.11	0.072184	3785.54	0.118931	3785.54	0.0581645	3785.54	0.0855423
3744.91	0.0721475	3784.54	0.109122	3784.54	0.127618	3784.54	0.0963492
3743.72	0.0641621	3783.53	0.0415918	3783.53	0.0596201	3783.53	0.0421265
3742.52	0.0659608	3782.52	0.0774869	3782.52	0.0323554	3782.52	0.107117
3741.33	0.0653142	3781.52	0.058072	3781.52	0.0793894	3781.52	0.161252
3740.13	0.0768896	3780.51	0.0482823	3780.51	0.0216075	3780.51	0.107045
3738.94	0.0676873	3779.5	0.0481078	3779.5	0.127628	3779.5	0.161164
3737.74	0.0731494	3778.5	0.0791806	3778.5	0.187849	3778.5	0.085315
3736.54	0.0786091	3777.49	0.0669797	3777.49	0.0436295	3777.49	0.226039
3735.35	0.0822351	3776.48	0.090829	3776.48	0.0814687	3776.48	0.0960761
3734.15	0.0675441	3775.47	0.0810393	3775.47	0.10608	3775.47	0.0635698
3732.96	0.0730018	3774.46	0.0688481	3774.46	0.0707093	3774.46	0.0960076
3731.76	0.0845606	3773.46	0.0686735	3773.46	0.0871851	3773.46	0.117615
3730.56	0.0643856	3772.45	0.0973063	3772.45	0.0619939	3772.45	0.171672
3729.36	0.0643506	3771.44	0.0539162	3771.44	0.163806	3771.44	0.0850881
3728.17	0.069195	3770.43	0.0441361	3770.43	0.111179	3770.43	0.106687
3726.97	0.0709881	3769.42	0.0823648	3769.42	0.0636461	3769.42	0.0633957
3725.77	0.0611961	3768.41	0.0965794	3768.41	0.0933099	3768.41	0.0849908
3724.57	0.0751827	3767.41	0.0292138	3767.41	0.086411	3767.41	0.0957689
3723.37	0.0580794	3766.4	0.105807	3766.4	0.0642851	3766.4	0.0957349
3722.18	0.065358	3765.39	0.0744433	3765.39	0.132506	3765.39	0.106508
3720.98	0.068369	3764.38	0.129424	3764.38	0.11038	3764.38	0.0416401
3719.78	0.0555406	3763.37	0.112449	3763.37	0.165378	3763.37	0.171258
3718.58	0.0530708	3762.36	0.162617	3762.36	0.138179	3762.36	0.182014
3717.38	0.0639985	3761.35	0.0857137	3761.35	0.13635	3761.35	0.127965
3716.18	0.0663985	3760.34	0.0999187	3760.34	0.114236	3760.34	0.117127
3714.98	0.0645367	3759.33	0.106919	3759.33	0.127619	3759.33	0.0954963
3713.78	0.0760645	3758.32	0.0995504	3758.32	0.0761067	3758.32	0.138642
3712.58	0.0638577	3757.31	0.0562474	3757.31	0.0844285	3757.31	0.117015
3711.38	0.061389	3756.3	0.0752358	3756.3	0.0714574	3756.3	0.149352
3710.18	0.0546635	3755.29	0.0582902	3755.29	0.110174	3755.29	0.06299
3708.98	0.0704417	3754.27	0.0557145	3754.27	0.152931	3754.27	0.127691
3707.77	0.0655409	3753.26	0.0579414	3753.26	0.135903	3753.26	0.149225
3706.57	0.0642898	3752.25	0.103239	3752.25	0.0732938	3752.25	0.0413338
3705.37	0.0794495	3751.24	0.0886946	3751.24	0.146424	3751.24	0.106007
3704.17	0.0551041	3750.23	0.0334814	3750.23	0.0534534	3750.23	0.116753
3702.97	0.078158	3749.22	0.0476573	3749.22	0.121503	3749.22	0.138275
3701.76	0.0574667	3748.21	0.0881519	3748.21	0.127775	3748.21	0.127456
3700.56	0.0647208	3747.19	0.0831844	3747.19	0.0722973	3747.19	0.138193
3699.36	0.0737939	3746.18	0.133226	3746.18	0.12007	3746.18	0.170476
3698.15	0.0682927	3745.17	0.0684851	3745.17	0.0990176	3745.17	0.105793
3696.95	0.0652219	3744.16	0.108941	3744.16	0.0668436	3744.16	0.105757
3695.75	0.0633656	3743.14	0.0776838	3743.14	0.117625	3743.14	0.0949518
3694.54	0.0475544	3742.13	0.0703342	3742.13	0.158275	3742.13	0.116453
3693.34	0.0711821	3741.12	0.0797169	3741.12	0.080602	3741.12	0.116416
3692.14	0.0681127	3740.1	0.0293648	3740.1	0.0322708	3740.1	0.0840851
3690.93	0.0765668	3739.09	0.0674095	3739.09	0.0678643	3739.09	0.0302393
3689.73	0.0547018	3738.08	0.0123028	3738.08	0.128713	3738.08	0.0624987
3688.52	0.0673986	3737.06	0.10526	3737.06	0.0824188	3737.06	0.127026
3687.32	0.075848	3736.05	0.090755	3736.05	0.130109	3736.05	0.20229
3686.11	0.0521773	3735.03	0.0619284	3735.03	0.123229	3735.03	0.0946795
3684.91	0.0691085	3734.02	0.102326	3734.02	0.0749375	3734.02	0.0838913
3683.7	0.072101	3733.01	0.104534	3733.01	0.0781697	3733.01	0.16988
3682.49	0.0756984	3731.99	0.0518479	3731.99	0.113711	3731.99	0.0730761
3681.29	0.0617335	3730.98	0.094618	3730.98	0.119963	3730.98	0.0515473
3680.08	0.0725963	3729.96	0.0395792	3729.96	0.0918921	3729.96	0.0837622
3678.87	0.0507684	3728.95	0.0584804	3728.95	0.104201	3728.95	0.0729845
3677.67	0.0543669	3727.93	0.132227	3727.93	0.0953125	3727.93	0.148162
3676.46	0.0706705	3726.92	0.110575	3726.92	0.0894554	3726.92	0.137377
3675.25	0.0700292	3725.9	0.0674854	3725.9	0.0795628	3725.9	0.137337
3674.04	0.0724119	3724.89	0.0601551	3724.89	0.0747179	3724.89	0.158774
3672.84	0.0602804	3723.87	0.117169	3723.87	0.0789508	3723.87	0.0943061
3671.63	0.0668967	3722.85	0.0717166	3722.85	0.120487	3722.85	0.094272
3670.42	0.0644429	3721.84	0.0977446	3721.84	0.0964845	3721.84	0.0620367
3669.21	0.0662208	3720.82	0.0570659	3720.82	0.0734908	3720.82	0.104936
3668	0.0728321	3719.8	0.0735658	3719.8	0.0767116	3719.8	0.190745
3666.79	0.0534618	3718.79	0.149578	3718.79	0.00939371	3718.79	0.126323
3665.58	0.0655097	3717.77	0.127965	3717.77	0.0579622	3717.77	0.0726481
3664.38	0.0636622	3716.75	0.0444581	3716.75	0.161922	3716.75	0.169146
3663.17	0.0418889	3715.74	0.0776032	3715.74	0.139948	3715.74	0.158377
3661.96	0.0750626	3714.72	0.0274543	3714.72	0.0988416	3714.72	0.126167
3660.75	0.0593311	3713.7	0.115319	3713.7	0.0819128	3713.7	0.158289
3659.53	0.0671424	3712.68	0.0723063	3712.68	0.0851254	3712.68	0.093933
3658.32	0.064693	3711.67	0.0840227	3711.67	0.119547	3711.67	0.136767
3657.11	0.0688803	3710.65	0.0148756	3710.65	0.110675	3710.65	0.0831501
3655.9	0.0597969	3709.63	0.135972	3709.63	0.143064	3709.63	0.168826
3654.69	0.0627774	3708.61	0.100125	3708.61	0.137212	3708.61	0.0830855
3653.48	0.0633455	3707.59	0.0333798	3707.59	0.106207	3707.59	0.147314
3652.27	0.0832031	3706.58	0.130656	3706.58	0.0420284	3706.58	0.0937297
3651.06	0.063275	3705.56	0.116209	3705.56	0.116643	3705.56	0.125816
3649.84	0.0614319	3704.54	0.0993892	3704.54	0.172133	3704.54	0.104367
3648.63	0.0650121	3703.52	0.111086	3703.52	0.121036	3703.52	0.125738
3647.42	0.0667836	3702.5	0.0942764	3702.5	0.0920715	3702.5	0.168506
3646.21	0.0685545	3701.48	0.0893379	3701.48	0.0992959	3701.48	0.09356
3644.99	0.0649057	3700.46	0.120024	3700.46	0.122592	3700.46	0.114923
3643.78	0.0558395	3699.44	0.155454	3699.44	0.110721	3699.44	0.179065
3642.57	0.0521943	3698.42	0.105412	3698.42	0.0998567	3698.42	0.125543
3641.35	0.0690118	3697.4	0.105228	3697.4	0.0930129	3697.4	0.114811
3640.14	0.0647637	3696.38	0.105044	3696.38	0.0942052	3696.38	0.15754
3638.92	0.0593139	3695.36	0.133328	3695.36	0.0903775	3695.36	0.0185284
3637.71	0.0604823	3694.34	0.0904413	3694.34	0.142765	3694.34	0.157452
3636.49	0.0622518	3693.32	0.0973744	3693.32	0.0706742	3693.32	0.157408
3635.28	0.0562045	3692.3	0.109052	3692.3	0.124058	3692.3	0.146679
3634.06	0.0543669	3691.28	0.0851542	3691.28	0.100154	3691.28	0.0504893
3632.85	0.0585408	3690.26	0.0588935	3690.26	0.0933187	3690.26	0.146595
3631.63	0.0591073	3689.24	0.0587192	3689.24	0.0814673	3689.24	0.157232
3630.42	0.0692864	3688.21	0.0466928	3688.21	0.100708	3688.21	0.135832
3629.2	0.0542328	3687.19	0.070213	3687.19	0.041726	3687.19	0.125115
3627.99	0.0704148	3686.17	0.0463441	3686.17	0.054954	3686.17	0.103727
3626.77	0.0649741	3685.15	0.0888044	3685.15	0.0992524	3685.15	0.071673
3625.55	0.0655389	3684.13	0.102835	3684.13	0.126499	3684.13	0.092985
3624.34	0.0679041	3683.1	0.112121	3683.1	0.0956098	3683.1	0.135629
3623.12	0.0426632	3682.08	0.0811546	3682.08	0.10381	3682.08	0.188928
3621.9	0.0828324	3681.06	0.088078	3681.06	0.0669239	3681.06	0.210211
3620.68	0.067796	3680.04	0.0594934	3680.04	0.152255	3680.04	0.0821855
3619.47	0.0647611	3679.01	0.101915	3679.01	0.0693011	3679.01	0.178118
3618.25	0.0731208	3677.99	0.0875356	3677.99	0.118554	3677.99	0.146087
3617.03	0.0760815	3676.97	0.0376676	3676.97	0.0286246	3676.97	0.178023
3615.81	0.0532651	3675.94	0.0753445	3675.94	0.078866	3675.94	0.0820567
3614.59	0.0610229	3674.92	0.0798955	3674.92	0.00598815	3674.92	0.0820249
3613.37	0.0627859	3673.9	0.108093	3673.9	0.048213	3673.9	0.113956
3612.15	0.0639488	3672.87	0.100811	3672.87	0.0664086	3672.87	0.0713078
3610.93	0.0621165	3671.85	0.110087	3671.85	0.110613	3671.85	0.0393251
3609.71	0.0566916	3670.82	0.147716	3670.82	0.0507754	3670.82	0.0392998
3608.49	0.060849	3669.8	0.15461	3669.8	0.0899637	3669.8	0.092512
3607.27	0.0685966	3668.77	0.0669975	3668.77	0.119142	3668.77	0.0924784
3606.05	0.0649691	3667.75	0.16132	3667.75	0.100324	3667.75	0.0924444
3604.83	0.0667289	3666.73	0.0548354	3666.73	0.0955044	3666.73	0.134981
3603.61	0.0607097	3665.7	0.0593768	3665.7	0.0756916	3665.7	0.0923772
3602.39	0.0654606	3664.67	0.113515	3664.67	0.0159158	3664.67	0.0604259
3601.17	0.0588458	3663.65	0	3663.65	0.0800523	3663.65	0.0710347
3599.95	0.0588113	3662.62	0.0895299	3662.62	0.0452657	3662.62	0.0603687
3598.73	0.0677452	3661.6	0.0751892	3661.6	0.117369	3661.6	0.198583
3597.5	0.0545583	3660.57	0.0325352	3660.57	0.0476348	3660.57	0.124106
3596.28	0.0634895	3659.55	0.0771936	3659.55	0.0937527	3659.55	0.124067
3595.06	0.0634541	3658.52	0.0345492	3658.52	0.0779559	3658.52	0.113399
3593.84	0.0598343	3657.49	0.0744727	3657.49	0.110072	3657.49	0.145244
3592.61	0.0514372	3656.47	0.0884453	3656.47	0.0643389	3656.47	0.0389455
3591.39	0.0651398	3655.44	0.135418	3655.44	0.0655157	3655.44	0.113288
3590.17	0.0609244	3654.41	0.0409304	3654.41	0.025787	3654.41	0.123873
3588.94	0.0662623	3653.39	0.0289717	3653.39	0.105783	3653.39	0.102593
3587.72	0.0626454	3652.36	0.130141	3652.36	0.153827	3652.36	0.113177
3586.5	0.0727549	3651.33	0.129947	3651.33	0.0762091	3651.33	0.113139
3585.27	0.0506422	3650.31	0.0755764	3650.31	0.0444827	3650.31	0.102487
3584.05	0.0547851	3649.28	0.0895298	3649.28	0.120426	3649.28	0.144907
3582.82	0.0523655	3648.25	0.0940518	3648.25	0.0288956	3648.25	0.0599673
3581.6	0.0565066	3647.22	0.0962306	3647.22	0.153654	3647.22	0.112991
3580.37	0.0594536	3646.19	0.0583697	3646.19	0.0422153	3646.19	0.176607
3579.15	0.0582267	3645.17	0.0864409	3645.17	0.0712899	3645.17	0.0598814
3577.92	0.0593843	3644.14	0.074492	3644.14	0.108324	3644.14	0.0280369
3576.7	0.058158	3643.11	0.0390132	3643.11	0.0666607	3643.11	0.112843
3575.47	0.0605066	3642.08	0.140018	3642.08	0.134556	3642.08	0.13401
3574.24	0.047368	3641.05	0.137481	3641.05	0.0560607	3641.05	0.112769
3573.02	0.0646056	3640.02	0.0549516	3640.02	0.0313509	3640.02	0.102133
3571.79	0.0574252	3638.99	0.0806506	3638.99	0.138033	3638.99	0.123292
3570.56	0.0508426	3637.96	0.0428478	3637.96	0.107348	3637.96	0.112658
3569.34	0.0549761	3636.93	0.0755864	3636.93	0.0866218	3636.93	0.112621
3568.11	0.0579176	3635.9	0.171788	3635.9	0.0738575	3635.9	0.112584
3566.88	0.061453	3634.87	0.0893267	3634.87	0.109842	3634.87	0.101956
3565.65	0.0596335	3633.84	0.0397977	3633.84	0.0821613	3633.84	0.123099
3564.42	0.0607883	3632.81	0.0725169	3632.81	0.0793508	3632.81	0.12306
3563.2	0.0601589	3631.78	0.0793823	3631.78	0.0914527	3631.78	0.101851
3561.97	0.051801	3630.75	0.0862476	3630.75	0.0787007	3630.75	0.0806484
3560.74	0.0594951	3629.72	0.0907696	3629.72	0.176273	3629.72	0.175853
3559.51	0.0553002	3628.69	0.048319	3628.69	0.0691047	3628.69	0.133485
3558.28	0.0707152	3627.66	0.102138	3627.66	0.0235692	3627.66	0.133445
3557.05	0.0475097	3626.63	0.0737856	3626.63	0.135017	3626.63	0.112251
3555.82	0.0753934	3625.6	0.0595224	3625.6	0.0706149	3625.6	0.122789
3554.59	0.0533834	3624.56	0.113322	3624.56	0.0509177	3624.56	0.12275
3553.36	0.055131	3623.53	0.0638606	3623.53	0.109679	3623.53	0.101568
3552.13	0.0598463	3622.5	0.0566467	3622.5	0.0403465	3622.5	0.122673
3550.9	0.0556569	3621.47	0.0470895	3621.47	0.0931327	3621.47	0.0592239
3549.67	0.0520628	3620.44	0.11492	3620.44	0.0337502	3620.44	0.101463
3548.44	0.0490629	3619.4	0.152258	3619.4	0.0736165	3619.4	0.101427
3547.2	0.0585212	3618.37	0.123925	3618.37	0.0886689	3618.37	0.122519
3545.97	0.072127	3617.34	0.0721689	3617.34	0.0471699	3617.34	0.154165
3544.74	0.0578591	3616.31	0.0602781	3616.31	0.0651974	3616.31	0.111882
3543.51	0.0548607	3615.27	0.118677	3615.27	0.0842052	3615.27	0.249103
3542.28	0.0643105	3614.24	0.0271136	3614.24	0.00306688	3614.24	0.0906944
3541.04	0.0589414	3613.21	0.134703	3613.21	0.0726423	3613.21	0.0589957
3539.81	0.0725343	3612.17	0.0806419	3612.17	0.102547	3612.17	0.0695204
3538.58	0.0600569	3611.14	0.113245	3611.14	0.130458	3611.14	0.143352
3537.34	0.0416613	3610.11	0.0311129	3610.11	0.108818	3610.11	0.16441
3536.11	0.0540657	3609.07	0.112877	3609.07	0.11393	3609.07	0.111623
3534.88	0.0694258	3608.04	0.0939661	3608.04	0.0675334	3608.04	0.164319
3533.64	0.0676134	3607	0.152287	3607	0.103351	3607	0.143184
3532.41	0.0622506	3605.97	0.0444565	3605.97	0.132234	3605.97	0.122055
3531.17	0.0533393	3604.93	0.0910711	3604.93	0.150209	3604.93	0.111475
3529.94	0.0556724	3603.9	0.0558053	3603.9	0.0632476	3603.9	0.174678
3528.71	0.0591874	3602.86	0.100067	3602.86	0.0168893	3602.86	0.100864
3527.47	0.038454	3601.83	0.123268	3601.83	0.0249793	3601.83	0.142974
3526.23	0.0644397	3600.79	0.0529394	3600.79	0.133994	3600.79	0.121863
3525	0.0549455	3599.76	0.0527554	3599.76	0.0441231	3599.76	0.142891
3523.76	0.0661417	3598.72	0.0712793	3598.72	0.081879	3598.72	0.0585965
3522.53	0.0596052	3597.69	0.0897934	3597.69	0.0761057	3597.69	0.0585681
3521.29	0.0642971	3596.65	0.115318	3596.65	0.111866	3596.65	0.163821
3520.05	0.0571728	3595.61	0.0590595	3595.61	0.0724741	3595.61	0.111144
3518.82	0.0642261	3594.58	0.0985956	3594.58	0.107238	3594.58	0.121631
3517.58	0.0553329	3593.54	0.119434	3593.54	0.201291	3593.54	0.142639
3516.34	0.0535278	3592.5	0.0958943	3592.5	0.124346	3592.5	0.100511
3515.11	0.0688414	3591.47	0.102711	3591.47	0.0671924	3591.47	0.142555
3513.87	0.0599523	3590.43	0.149219	3590.43	0.082172	3590.43	0.110959
3512.63	0.0616879	3589.39	0.0299914	3589.39	0.083321	3589.39	0.121439
3511.39	0.0746316	3588.36	0.116161	3588.36	0.0558287	3588.36	0.121401
3510.15	0.0521802	3587.32	0.143971	3587.32	0.0757381	3587.32	0.100336
3508.92	0.0568645	3586.28	0.0597962	3586.28	0.0571392	3586.28	0.100301
3507.68	0.0585992	3585.24	0.103932	3585.24	0.189578	3585.24	0.0266975
3506.44	0.0491328	3584.21	0.080431	3584.21	0.0505562	3584.21	0.110739
3505.2	0.0661922	3583.17	0.0755896	3583.17	0.0457837	3583.17	0.184247
3503.96	0.0561384	3582.13	0.0847306	3582.13	0.0942925	3582.13	0.173693
3502.72	0.0625852	3581.09	0.0845467	3581.09	0.100367	3581.09	0.15264
3501.48	0.0554813	3580.05	0.0960213	3580.05	0.0798055	3580.05	0.131594
3500.24	0.0713487	3579.01	0.0888462	3579.01	0.0917977	3579.01	0.142054
3499	0.0577685	3577.97	0.0770136	3577.97	0.0327891	3577.97	0.0790237
3497.76	0.0530244	3576.93	0.11411	3576.93	0.0763312	3576.93	0.194452
3496.52	0.0553455	3575.9	0.0440428	3575.9	0.15239	3575.9	0.131434
3495.27	0.0729665	3574.86	0.0508501	3574.86	0.0628473	3574.86	0.110407
3494.03	0.0582194	3573.82	0.178745	3573.82	0.0738437	3573.82	0.0998792
3492.79	0.0605379	3572.78	0.113364	3572.78	0.0651331	3572.78	0.0998443
3491.55	0.0581504	3571.74	0.0293734	3571.74	0.0938571	3571.74	0.162737
3490.31	0.0598799	3570.7	0.0268753	3570.7	0.149169	3570.7	0.141719
3489.06	0.0533776	3569.66	0.124433	3569.66	0.0380302	3569.66	0.0787697
3487.82	0.0639251	3568.62	0.0567769	3568.62	0.0854531	3568.62	0.12067
3486.58	0.0556613	3567.57	0.100796	3567.57	0.123013	3567.57	0.0996685
3485.34	0.0615035	3566.53	0.0982887	3566.53	0.0867399	3566.53	0.110113
3484.09	0.0467807	3565.49	0.11903	3565.49	0.0544129	3565.49	0.162466
3482.85	0.0702442	3564.45	0.0839676	3564.45	0.131325	3564.45	0.120516
3481.61	0.0602235	3563.41	0.107033	3563.41	0.0990017	3563.41	0.0890535
3480.36	0.0525554	3562.37	0.0836096	3562.37	0.054885	3562.37	0.109966
3479.12	0.0560444	3561.33	0.148496	3561.33	0.145525	3561.33	0.130872
3477.87	0.0536625	3560.29	0.16457	3560.29	0.0837172	3560.29	0.0156663
3476.63	0.0606708	3559.24	0.0784102	3559.24	0.178251	3559.24	0.151728
3475.38	0.0547684	3558.2	0.0712642	3558.2	0.0584535	3558.2	0.0993531
3474.14	0.0482819	3557.16	0.133788	3557.16	0.108737	3557.16	0.141176
3472.89	0.0687769	3556.12	0.0801923	3556.12	0.0469703	3556.12	0.141135
3471.65	0.056426	3555.07	0.168241	3555.07	0.0775844	3555.07	0.0992479
3470.4	0.0622547	3554.03	0.0891204	3554.03	0.146505	3554.03	0.0782937
3469.15	0.0628055	3552.99	0.139996	3552.99	0.125038	3552.99	0.109636
3467.91	0.0539792	3551.95	0.0841048	3551.95	0.0132148	3551.95	0.130512
3466.66	0.0545311	3550.9	0.086245	3550.9	0.12139	3550.9	0.17229
3465.41	0.0556692	3549.86	0.0953472	3549.86	0.110733	3549.86	0.0363553
3464.17	0.0509493	3548.82	0.139231	3548.82	0.084373	3548.82	0.0885867
3462.92	0.050916	3547.77	0.0949796	3547.77	0.101206	3547.77	0.1826
3461.67	0.0608365	3546.73	0.0947958	3546.73	0.0493399	3546.73	0.08852
3460.43	0.0479225	3545.68	0.0621542	3545.68	0.110324	3545.68	0.16161
3459.18	0.0636929	3544.64	0.0387891	3544.64	0.139896	3544.64	0.203344
3457.93	0.0519535	3543.59	0.105835	3543.59	0.0527356	3543.59	0.161521
3456.68	0.0718126	3542.55	0.043079	3542.55	0.101925	3542.55	0.130152
3455.43	0.050717	3541.5	0.105458	3541.5	0.193258	3541.5	0.0570346
3454.18	0.0483444	3540.46	0.10296	3540.46	0.0639738	3540.46	0.192699
3452.93	0.0430489	3539.41	0.158367	3539.41	0.126855	3539.41	0.0778505
3451.68	0.0535406	3538.37	0.0516395	3538.37	0.0544667	3538.37	0.17173
3450.43	0.0535067	3537.32	0.107037	3537.32	0.158487	3537.32	0.0882198
3449.18	0.0482135	3536.28	0.136948	3536.28	0.157645	3536.28	0.109049
3447.93	0.0522708	3535.23	0.0696313	3535.23	0.113693	3535.23	0.17159
3446.68	0.0417221	3534.19	0.129618	3534.19	0.153989	3534.19	0.0359805
3445.43	0.0656376	3533.14	0.099349	3533.14	0.0424789	3533.14	0.0463817
3444.18	0.0574261	3532.09	0.0714038	3532.09	0.117043	3532.09	0.161026
3442.93	0.0626463	3531.05	0.0920386	3531.05	0.131867	3531.05	0.108866
3441.68	0.0573571	3530	0.0987976	3530	0.132001	3530	0.119251
3440.43	0.0567392	3528.95	0.133299	3528.95	0.125283	3528.95	0.0566947
3439.18	0.0508695	3527.91	0.133115	3527.91	0.0725809	3527.91	0.119174
3437.92	0.0543368	3526.86	0.109798	3526.86	0.0580481	3526.86	0.139969
3436.67	0.0438036	3525.81	0.148908	3525.81	0.113951	3525.81	0.108683
3435.42	0.0670991	3524.77	0.0770793	3524.77	0.0837709	3524.77	0.171124
3434.17	0.0536523	3523.72	0.0699625	3523.72	0.108357	3523.72	0.139844
3432.91	0.0635289	3522.67	0.0928826	3522.67	0.0811164	3522.67	0.118983
3431.66	0.0489218	3521.62	0.134278	3521.62	0.146756	3521.62	0.0981288
3430.41	0.0453925	3520.57	0.122542	3520.57	0.02666	3520.57	0.118906
3429.15	0.0552651	3519.53	0.115425	3519.53	0.155812	3519.53	0.139678
3427.9	0.0628037	3518.48	0.0875383	3518.48	0.0689753	3518.48	0.129233
3426.65	0.0511199	3517.43	0.0850403	3517.43	0.178536	3517.43	0.0667853
3425.39	0.0604037	3516.38	0.137949	3516.38	0.0985593	3516.38	0.170752
3424.14	0.061533	3515.33	0.0823681	3515.33	0.119207	3515.33	0.139511
3422.88	0.0620797	3514.28	0.128334	3514.28	0.150588	3514.28	0.0770918
3421.63	0.046913	3513.23	0.0773915	3513.23	0.0452692	3513.23	0.0770599
3420.37	0.0550267	3512.18	0.0864357	3512.18	0.0883656	3512.18	0.0562423
3419.12	0.0497569	3511.13	0.0862519	3511.13	0.0348205	3511.13	0.118563
3417.86	0.064265	3510.08	0.0952962	3510.08	0.0281311	3510.08	0.118524
3416.6	0.0537615	3509.03	0.00289057	3509.03	0.156096	3509.03	0.139262
3415.35	0.0525647	3507.98	0.0741874	3507.98	0.0928098	3507.98	0.159994
3414.09	0.0612511	3506.93	0.099354	3506.93	0.0968488	3506.93	0.128794
3412.83	0.0571474	3505.88	0.110693	3505.88	0.125262	3505.88	0.107989
3411.58	0.0489776	3504.83	0.188846	3504.83	0.0922396	3504.83	0.0145193
3410.32	0.0501066	3503.78	0.163302	3503.78	0.101147	3503.78	0.107915
3409.06	0.0547205	3502.73	0.12395	3502.73	0.0184246	3502.73	0.0871225
3407.8	0.0546863	3501.68	0.0707996	3501.68	0.0975131	3501.68	0.138972
3406.55	0.0482653	3500.63	0.0729204	3500.63	0.0654903	3500.63	0.128555
3405.29	0.043588	3499.58	0.0727367	3499.58	0.127007	3499.58	0.159635
3404.03	0.059228	3498.52	0.137013	3498.52	0.116417	3498.52	0.0973614
3402.77	0.0551307	3497.47	0.1023	3497.47	0.0951188	3497.47	0.107696
3401.51	0.0550965	3496.42	0.0906027	3496.42	0.152705	3496.42	0.118028
3400.25	0.0620239	3495.37	0.097323	3495.37	0.0184598	3495.37	0.169822
3398.99	0.0434284	3494.32	0.117842	3494.32	0.145162	3494.32	0.0972222
3397.73	0.0480359	3493.26	0.0877566	3493.26	0.133601	3493.26	0.13864
3396.47	0.0503222	3492.21	0.105971	3492.21	0.134702	3492.21	0.0349836
3395.21	0.0601431	3491.16	0.0873891	3491.16	0.165964	3491.16	0.128197
3393.95	0.0566308	3490.1	0.151579	3490.1	0.0979742	3490.1	0.0452918
3392.69	0.0676061	3489.05	0.10082	3489.05	0.0718402	3489.05	0.159187
3391.43	0.0548242	3488	0.084543	3488	0.106015	3488	0.128078
3390.17	0.057107	3486.94	0.114232	3486.94	0.0759933	3486.94	0.117685
3388.91	0.0756043	3485.89	0.123237	3485.89	0.172383	3485.89	0.0244829
3387.65	0.0466159	3484.84	0.10697	3484.84	0.0869522	3484.84	0.0451592
3386.39	0.0587401	3483.78	0.106776	3483.78	0.124989	3483.78	0.158964
3385.12	0.048866	3482.73	0.150225	3482.73	0.111505	3482.73	0.0761459
3383.86	0.0604067	3481.67	0.0949249	3481.67	0.0436137	3481.67	0.0554247
3382.6	0.04475	3480.62	0.0901513	3480.62	0.1273	3480.62	0.158829
3381.34	0.0562872	3479.57	0.0624288	3479.57	0.070112	3479.57	0.0967349
3380.07	0.0649279	3478.51	0.115028	3478.51	0.149878	3478.51	0.13806
3378.81	0.0579532	3477.46	0.0896001	3477.46	0.0868785	3477.46	0.0966655
3377.55	0.0573402	3476.4	0.144484	3476.4	0.0976842	3476.4	0.137977
3376.28	0.0578837	3475.35	0.135111	3475.35	0.130818	3475.35	0.137936
3375.02	0.0480248	3474.29	0.137213	3474.29	0.129965	3474.29	0.148228
3373.75	0.0583924	3473.23	0.0636506	3473.23	0.140759	3473.23	0.0965263
3372.49	0.0624014	3472.18	0.19415	3472.18	0.135057	3472.18	0.168802
3371.23	0.0560125	3471.12	0.138937	3471.12	0.165246	3471.12	0.127442
3369.96	0.047316	3470.07	0.0539391	3470.07	0.119774	3470.07	0.106749
3368.7	0.0409323	3469.01	0.12939	3469.01	0.0966156	3469.01	0.117038
3367.43	0.0628365	3467.95	0.131492	3467.95	0.0928613	3467.95	0.158293
3366.16	0.0541437	3466.9	0.0557023	3466.9	0.0561464	3466.9	0.137605
3364.9	0.0552639	3465.84	0.0371982	3465.84	0.152238	3465.84	0.0962833
3363.63	0.0488835	3464.78	0.140081	3464.78	0.100013	3464.78	0.116885
3362.37	0.0569259	3463.72	0.0895166	3463.72	0.120482	3463.72	0.10653
3361.1	0.059775	3462.67	0.0549869	3462.67	0.0556922	3462.67	0.106494
3359.83	0.0626229	3461.61	0.121191	3461.61	0.0577569	3461.61	0.0961441
3358.57	0.0366454	3460.55	0.0843854	3460.55	0.0733776	3460.55	0.106421
3357.3	0.0510241	3459.49	0.0659007	3459.49	0.186804	3459.49	0.168246
3356.03	0.0458045	3458.44	0.148081	3458.44	0.0891197	3458.44	0.0857316
3354.76	0.0601758	3457.38	0.0540975	3457.38	0.0940817	3457.38	0.065085
3353.49	0.0405551	3456.32	0.0973812	3456.32	0.154214	3456.32	0.0547497
3352.23	0.0566501	3455.26	0.13378	3455.26	0.0875483	3455.26	0.116543
3350.96	0.0548879	3454.2	0.133587	3454.2	0.0392863	3454.2	0.106203
3349.69	0.0490968	3453.14	0.133403	3453.14	0.0355443	3453.14	0.106167
3348.42	0.0605758	3452.08	0.0989221	3452.08	0.0656594	3452.08	0.0443389
3347.15	0.0651447	3451.02	0.050749	3451.02	0.0416039	3451.02	0.136985
3345.88	0.0633823	3449.97	0.107696	3449.97	0.113292	3449.97	0.136944
3344.61	0.0685241	3448.91	0.0846597	3448.91	0.0950387	3448.91	0.106022
3343.34	0.0661866	3447.85	0.134731	3447.85	0.0854899	3447.85	0.0751092
3342.07	0.063275	3446.79	0.134538	3446.79	0.104938	3446.79	0.0750778
3340.8	0.05519	3445.73	0.0726923	3445.73	0.127283	3445.73	0.116201
3339.53	0.05803	3444.67	0.152423	3444.67	0.0848816	3444.67	0.116163
3338.26	0.0568458	3443.61	0.129407	3443.61	0.132335	3443.61	0.136697
3336.99	0.0476172	3442.54	0.124653	3442.54	0.1054	3442.54	0.0441012
3335.72	0.0596493	3441.48	0.0742527	3441.48	0.049499	3441.48	0.0646391
3334.44	0.0544447	3440.42	0.0900461	3440.42	0.0776266	3440.42	0.0646095
3333.17	0.0544105	3439.36	0.0944232	3439.36	0.0767777	3439.36	0.0851374
3331.9	0.0515053	3438.3	0.164945	3438.3	0.0981355	3438.3	0.0953815
3330.63	0.0491757	3437.24	0.107738	3437.24	0.0499924	3437.24	0.146725
3329.36	0.0479944	3436.18	0.107554	3436.18	0.0578352	3436.18	0.177503
3328.08	0.0559959	3435.12	0.0686093	3435.12	0.084004	3435.12	0.0952777
3326.81	0.0639938	3434.05	0.0775472	3434.05	0.147789	3434.05	0.126055
3325.54	0.0587953	3432.99	0.0340607	3432.99	0.0900235	3432.99	0.187629
3324.26	0.0576131	3431.93	0.0976886	3431.93	0.0293817	3431.93	0.0849066
3322.99	0.048977	3430.87	0.0815569	3430.87	0.139427	3430.87	0.11567
3321.71	0.0546772	3429.8	0.145156	3429.8	0.0113095	3429.8	0.125897
3320.44	0.0500575	3428.74	0.0948622	3428.74	0.0596317	3428.74	0.125857
3319.17	0.0494509	3427.68	0.169829	3427.68	0.122395	3427.68	0.0950355
3317.89	0.0379582	3426.61	0.0512308	3426.61	0.095521	3426.61	0.0744827
3316.62	0.0585507	3425.55	0.171708	3425.55	0.091779	3425.55	0.0744513
3315.34	0.0527883	3424.49	0.0781892	3424.49	0.0283178	3424.49	0.135954
3314.06	0.0550451	3423.42	0.112148	3423.42	0.090078	3423.42	0.0333723
3312.79	0.0555833	3422.36	0.109679	3422.36	0.088262	3422.36	0.0538527
3311.51	0.0652806	3421.3	0.109496	3421.3	0.0874131	3421.3	0.176834
3310.24	0.0703953	3420.23	0.168447	3420.23	0.119291	3420.23	0.084544
3308.96	0.0617747	3419.17	0.106843	3419.17	0.0828231	3419.17	0.176739
3307.68	0.0525855	3418.1	0.108935	3418.1	0.092556	3418.1	0.0434947
3306.41	0.0485475	3417.04	0.0723721	3417.04	0.0820851	3417.04	0.104934
3305.13	0.0593805	3415.97	0.0767299	3415.97	0.0735371	3415.97	0.125383
3303.85	0.0656353	3414.91	0.103824	3414.91	0.12463	3414.91	0.0946206
3302.57	0.0558804	3413.84	0.0400123	3413.84	0.144931	3413.84	0.0741075
3301.3	0.0404134	3412.78	0.101181	3412.78	0.140222	3412.78	0.0945512
3300.02	0.0506685	3411.71	0.0896389	3411.71	0.0960956	3411.71	0.145697
3298.74	0.0694895	3410.65	0.0553804	3410.65	0.0692904	3410.65	0.104717
3297.46	0.0568853	3409.58	0.0688306	3409.58	0.11938	3409.58	0.0842151
3296.18	0.0614197	3408.51	0.118602	3408.51	0.0685493	3408.51	0.0637199
3294.9	0.0619552	3407.45	0.0752803	3407.45	0.078273	3407.45	0.0841492
3293.62	0.053356	3406.38	0.0660236	3406.38	0.0822237	3406.38	0.125027
3292.34	0.0784376	3405.31	0.0681059	3405.31	0.0967389	3405.31	0.124988
3291.06	0.066414	3404.25	0.136004	3404.25	0.0325032	3404.25	0.0840506
3289.78	0.0606717	3403.18	0.197076	3403.18	0.0700651	3403.18	0.165801
3288.5	0.0629183	3402.11	0.0698403	3402.11	0.0567307	3402.11	0.0839852
3287.22	0.0594603	3401.05	0.0696566	3401.05	0.166272	3401.05	0.13505
3285.94	0.0668385	3399.98	0.123902	3399.98	0.0320035	3399.98	0.17588
3284.66	0.0622407	3398.91	0.0919673	3398.91	0.106004	3398.91	0.165617
3283.38	0.0764563	3397.84	0.0577767	3397.84	0.171346	3397.84	0.00213652
3282.1	0.0707184	3396.78	0.13467	3396.78	0.0726345	3396.78	0.104247
3280.82	0.078089	3395.71	0.105012	3395.71	0.0343765	3395.71	0.17569
3279.53	0.0632376	3394.64	0.156942	3394.64	0.102579	3394.64	0.0939649
3278.25	0.0649107	3393.57	0.0933152	3393.57	0.115143	3393.57	0.104138
3276.97	0.0586097	3392.5	0.0659511	3392.5	0.0481382	3392.5	0.144928
3275.69	0.0551585	3391.43	0.0544383	3391.43	0.0616658	3391.43	0.0836566
3274.4	0.0773264	3390.36	0.0882328	3390.36	0.0713577	3390.36	0.165249
3273.12	0.0715961	3389.3	0.069932	3389.3	0.0465523	3389.3	0.063188
3271.83	0.0732657	3388.23	0.137666	3388.23	0.0993544	3388.23	0.073358
3270.55	0.0641247	3387.16	0.0876819	3387.16	0.135851	3387.16	0.0427325
3269.27	0.0783099	3386.09	0.0852325	3386.09	0.112005	3386.09	0.124279
3267.98	0.0794085	3385.02	0.116732	3385.02	0.104441	3385.02	0.0834594
3266.7	0.0788011	3383.95	0.102963	3383.95	0.106453	3383.95	0.0630401
3265.41	0.075351	3382.88	0.116355	3382.88	0.120911	3382.88	0.144544
3264.13	0.0753127	3381.81	0.161392	3381.81	0.0980367	3381.81	0.144501
3262.84	0.0661817	3380.74	0.14311	3380.74	0.0675156	3380.74	0.144459
3261.56	0.0746682	3379.66	0.0321329	3379.66	0.0924937	3379.66	0.103669
3260.27	0.0831514	3378.59	0.0636034	3378.59	0.0696316	3378.59	0.0934479
3258.99	0.0734562	3377.52	0.0498635	3377.52	0.0898224	3377.52	0.0934134
3257.7	0.0762576	3376.45	0.137815	3376.45	0.057404	3376.45	0.113742
3256.41	0.0756514	3375.38	0.0969629	3375.38	0.0374309	3375.38	0.144245
3255.13	0.0784514	3374.31	0.0967696	3374.31	0.0929869	3374.31	0.123846
3253.84	0.0750074	3373.24	0.0401239	3373.24	0.0873525	3373.24	0.083099
3252.55	0.105611	3372.16	0.0467186	3372.16	0.129497	3372.16	0.103417
3251.26	0.0857104	3371.09	0.0871846	3371.09	0.11908	3371.09	0.093207
3249.98	0.0879391	3370.02	0.0418488	3370.02	0.142103	3370.02	0.103345
3248.69	0.081093	3368.95	0.100364	3368.95	0.100161	3368.95	0.0422862
3247.4	0.106002	3367.88	0.113718	3367.88	0.11745	3367.88	0.113441
3246.11	0.083282	3366.8	0.113534	3366.8	0.0917532	3366.8	0.123571
3244.82	0.0872099	3365.73	0.0952915	3365.73	0.131954	3365.73	0.0828696
3243.53	0.078669	3364.66	0.0951079	3364.66	0.0967205	3364.66	0.0828368
3242.24	0.085429	3363.58	0.101693	3363.58	0.103496	3363.58	0.0828041
3240.95	0.0978512	3362.51	0.11278	3362.51	0.117904	3362.51	0.0929317
3239.67	0.0978085	3361.44	0.135139	3361.44	0.0912803	3361.44	0.174168
3238.38	0.0909711	3360.36	0.0785904	3360.36	0.075152	3360.36	0.143649
3237.08	0.096025	3359.29	0.0941806	3359.29	0.106731	3359.29	0.123295
3235.79	0.0965489	3358.21	0.112027	3358.21	0.0934672	3358.21	0.174026
3234.5	0.0931111	3357.14	0.127608	3357.14	0.0830751	3357.14	0.163826
3233.21	0.0879771	3356.06	0.116153	3356.06	0.161347	3356.06	0.15363
3231.92	0.0873706	3354.99	0.0979491	3354.99	0.0622919	3354.99	0.163735
3230.63	0.092986	3353.92	0.0414583	3353.92	0.0814501	3353.92	0.0520674
3229.34	0.0963374	3352.84	0.106587	3352.84	0.135864	3352.84	0.0520395
3228.05	0.0945989	3351.77	0.113153	3351.77	0.103556	3351.77	0.0824442
3226.75	0.0962529	3350.69	0.121965	3350.69	0.0779204	3350.69	0.122981
3225.46	0.0950801	3349.61	0.126284	3349.61	0.0913505	3349.61	0.0925194
3224.17	0.0831719	3348.54	0.10809	3348.54	0.138108	3348.54	0.16346
3222.88	0.0820023	3347.46	0.0583968	3347.46	0.0943886	3347.46	0.143139
3221.58	0.0949542	3346.39	0.103211	3346.39	0.153506	3346.39	0.163368
3220.29	0.0768405	3345.31	0.0760403	3345.31	0.0974267	3345.31	0.13292
3219	0.0892236	3344.23	0.0870989	3344.23	0.173654	3344.23	0.112613
3217.7	0.0829729	3343.16	0.0869153	3343.16	0.066202	3343.16	0.163231
3216.41	0.0806758	3342.08	0.0687407	3342.08	0.152874	3342.08	0.153056
3215.11	0.0953083	3341	0.124758	3341	0.0768508	3341	0.153012
3213.82	0.098087	3339.93	0.122318	3339.93	0.123551	3339.93	0.122589
3212.52	0.0811219	3338.85	0.0726928	3338.85	0.13124	3338.85	0.173173
3211.23	0.065855	3337.77	0.0343191	3337.77	0.100896	3337.77	0.0820192
3209.93	0.0940119	3336.69	0.10154	3336.69	0.169427	3336.69	0.132593
3208.64	0.0956613	3335.62	0.119318	3335.62	0.128632	3335.62	0.132552
3207.34	0.0832189	3334.54	0.09667	3334.54	0.125863	3334.54	0.112275
3206.04	0.0859967	3333.46	0.0628087	3333.46	0.137347	3333.46	0.0818888
3204.75	0.0899003	3332.38	0.120995	3332.38	0.0851734	3332.38	0.0818561
3203.45	0.0802828	3331.3	0.129788	3331.3	0.11186	3331.3	0.162728
3202.15	0.0830594	3330.22	0.131841	3330.22	0.0986458	3330.22	0.122237
3200.86	0.0909034	3329.15	0.131648	3329.15	0.111079	3329.15	0.101978
3199.56	0.0914249	3328.07	0.0865831	3328.07	0.087423	3328.07	0.0918336
3198.26	0.0925095	3326.99	0.111072	3326.99	0.0799168	3326.99	0.142332
3196.96	0.0795237	3325.91	0.104159	3325.91	0.123663	3325.91	0.0917651
3195.67	0.0856738	3324.83	0.112942	3324.83	0.136077	3324.83	0.111937
3194.37	0.0777577	3323.75	0.0746362	3323.75	0.142799	3323.75	0.101798
3193.07	0.0794062	3322.67	0.0946323	3322.67	0.150464	3322.67	0.0108619
3191.77	0.0804917	3321.59	0.0944488	3321.59	0.127774	3321.59	0.162317
3190.47	0.0815768	3320.51	0.109952	3320.51	0.157248	3320.51	0.101691
3189.17	0.0877209	3319.43	0.143369	3319.43	0.115602	3319.43	0.162226
3187.87	0.0798118	3318.35	0.127499	3318.35	0.134642	3318.35	0.121806
3186.57	0.0820204	3317.27	0.0847483	3317.27	0.10154	3317.27	0.0612156
3185.27	0.0870372	3316.19	0.127112	3316.19	0.100677	3316.19	0.0611863
3183.97	0.0830644	3315.1	0.100058	3315.1	0.0941223	3315.1	0.1116
3182.67	0.0852709	3314.02	0.14462	3314.02	0.151048	3314.02	0.111563
3181.37	0.0745621	3312.94	0.204843	3312.94	0.111336	3312.94	0.12161
3180.07	0.0863131	3311.86	0.168806	3311.86	0.108571	3311.86	0.050985
3178.77	0.092447	3310.78	0.132779	3310.78	0.110543	3310.78	0.121532
3177.47	0.0839877	3309.7	0.0654373	3309.7	0.109676	3309.7	0.101332
3176.16	0.0996575	3308.61	0.0741849	3308.61	0.110698	3308.61	0.131533
3174.86	0.0827856	3307.53	0.127649	3307.53	0.118351	3307.53	0.121415
3173.56	0.0917194	3306.45	0.147562	3306.45	0.131674	3306.45	0.131451
3172.26	0.0832668	3305.37	0.104863	3305.37	0.156349	3305.37	0.101189
3170.95	0.0787418	3304.28	0.0867691	3304.28	0.147901	3304.28	0.101153
3169.65	0.082066	3303.2	0.108909	3303.2	0.162163	3303.2	0.101117
3168.35	0.0876306	3302.12	0.0952883	3302.12	0.123455	3302.12	0.0809433
3167.04	0.079185	3301.03	0.200092	3301.03	0.0753865	3301.03	0.0809106
3165.74	0.0757846	3299.95	0.18869	3299.95	0.126654	3299.95	0.121141
3164.44	0.0763061	3298.87	0.0879505	3298.87	0.118353	3298.87	0.100974
3163.13	0.0762676	3297.78	0.0899683	3297.78	0.0892583	3297.78	0.131126
3161.83	0.0773487	3296.7	0.138891	3296.7	0.150893	3296.7	0.131085
3160.52	0.0840274	3295.61	0.0694575	3295.61	0.0755038	3295.61	0.120986
3159.22	0.0839874	3294.53	0.131753	3294.53	0.154129	3294.53	0.110889
3157.91	0.0733153	3293.44	0.120379	3293.44	0.0664824	3293.44	0.151076
3156.61	0.0827882	3292.36	0.102314	3292.36	0.0978624	3292.36	0.211359
3155.3	0.083867	3291.27	0.155643	3291.27	0.141501	3291.27	0.0605123
3153.99	0.0709644	3290.19	0.0907312	3290.19	0.143594	3290.19	0.12079
3152.69	0.0793139	3289.1	0.0994401	3289.1	0.119248	3289.1	0.1509
3151.38	0.0876601	3288.02	0.105922	3288.02	0.0637722	3288.02	0.110664
3150.07	0.0915318	3286.93	0.141385	3286.93	0.0913473	3286.93	0.150812
3148.77	0.0898138	3285.85	0.16123	3285.85	0.0962751	3285.85	0.140724
3147.46	0.0780397	3284.76	0.129802	3284.76	0.147417	3284.76	0.0804228
3146.15	0.0886141	3283.67	0.0983844	3283.67	0.106115	3283.67	0.120556
3144.84	0.0896902	3282.59	0.138283	3282.59	0.142154	3282.59	0.100438
3143.54	0.0801565	3281.5	0.17148	3281.5	0.113124	3281.5	0.140555
3142.23	0.0868163	3280.41	0.1267	3280.41	0.0812753	3280.41	0
3140.92	0.0823105	3279.33	0.139853	3279.33	0.115417	3279.33	0.0702254
3139.61	0.0750159	3278.24	0.130726	3278.24	0.14389	3278.24	0.140428
3138.3	0.0788832	3277.15	0.12828	3277.15	0.122413	3277.15	0.0200053
3136.99	0.0872116	3276.07	0.0746392	3276.07	0.117903	3276.07	0.160404
3135.68	0.0916329	3274.98	0.0944643	3274.98	0.119989	3274.98	0.140302
3134.37	0.0871301	3273.89	0.158783	3273.89	0.0957008	3273.89	0.120206
3133.06	0.0636733	3272.8	0.0873644	3272.8	0.119444	3272.8	0.120167
3131.75	0.0814746	3271.71	0.0915997	3271.71	0.0622128	3271.71	0.0299152
3130.44	0.074747	3270.63	0.167016	3270.63	0.184796	3270.63	0.100045
3129.13	0.0774947	3269.54	0.155671	3269.54	0.135105	3269.54	0.0799682
3127.82	0.0880408	3268.45	0.0909721	3268.45	0.156943	3268.45	0.180124
3126.51	0.0712902	3267.36	0.0952074	3267.36	0.133614	3267.36	0.119972
3125.19	0.0768213	3266.27	0.0949885	3266.27	0.106527	3266.27	0.180026
3123.88	0.0806798	3265.18	0.123674	3265.18	0.0596996	3265.18	0.0798386
3122.57	0.0839804	3264.09	0.147895	3264.09	0.0881189	3264.09	0.13988
3121.26	0.0922889	3263	0.0987955	3263	0.0554135	3263	0.0797736
3119.95	0.072771	3261.91	0.145239	3261.91	0.120489	3261.91	0.109769
3118.63	0.0810784	3260.82	0.0850531	3260.82	0.162042	3260.82	0.119738
3117.32	0.0754763	3259.73	0.155898	3259.73	0.16975	3259.73	0.1197
3116.01	0.0949025	3258.64	0.124597	3258.64	0.109802	3258.64	0.149673
3114.69	0.0848516	3257.55	0.119933	3257.55	0.187978	3257.55	0.18964
3113.38	0.0920385	3256.46	0.0886509	3256.46	0.134623	3256.46	0.129584
3112.06	0.088106	3255.37	0.197183	3255.37	0.109458	3255.37	0.129544
3110.75	0.0852864	3254.28	0.123731	3254.28	0.114347	3254.28	0.0795145
3109.43	0.0846904	3253.19	0.0436455	3253.19	0.116425	3253.19	0.119467
3108.12	0.0890942	3252.1	0.136607	3252.1	0.0987835	3252.1	0.159405
3106.8	0.089053	3251.01	0.0831601	3251.01	0.169375	3251.01	0.129381
3105.49	0.0851248	3249.91	0.176083	3249.91	0.132963	3249.91	0.149323
3104.17	0.0889706	3248.82	0.147037	3248.82	0.106884	3248.82	0.13929
3102.86	0.0867091	3247.73	0.151243	3247.73	0.155862	3247.73	0.169212
3101.54	0.0966576	3246.64	0.0712358	3246.64	0.169181	3246.64	0.0992606
3100.22	0.0838535	3245.55	0.108703	3245.55	0.111224	3245.55	0.199072
3098.91	0.0882512	3244.45	0.190461	3244.45	0.11423	3244.45	0.129139
3097.59	0.0671339	3243.36	0.16587	3243.36	0.142547	3243.36	0.109135
3096.27	0.0892782	3242.27	0.132419	3242.27	0.157734	3242.27	0.188937
3094.96	0.0831383	3241.17	0.1322	3241.17	0.138238	3241.17	0.119039
3093.64	0.0886416	3240.08	0.178479	3240.08	0.140304	3240.08	0.20879
3092.32	0.0653235	3238.99	0.105201	3238.99	0.1686	3238.99	0.158861
3091	0.0857887	3237.89	0.158113	3237.89	0.124755	3237.89	0.0690557
3089.68	0.0973822	3236.8	0.135759	3236.8	0.101532	3236.8	0.178714
3088.36	0.0951239	3235.71	0.168733	3235.71	0.127009	3235.71	0.178666
3087.05	0.0828981	3234.61	0.183988	3234.61	0.188058	3234.61	0.128775
3085.73	0.0911634	3233.52	0.130677	3233.52	0.147984	3233.52	0.158635
3084.41	0.088354	3232.42	0.123825	3232.42	0.0985615	3232.42	0.128694
3083.09	0.0916335	3231.33	0.145722	3231.33	0.173623	3231.33	0.168508
3081.77	0.105979	3230.23	0.114546	3230.23	0.113919	3230.23	0.138575
3080.45	0.0865709	3229.14	0.189487	3229.14	0.126274	3229.14	0.128572
3079.13	0.0821051	3228.04	0.169369	3228.04	0.195679	3228.04	0.158409
3077.8	0.0826182	3226.95	0.135995	3226.95	0.177153	3226.95	0.158364
3076.48	0.0947426	3225.85	0.0938001	3225.85	0.157694	3225.85	0.118496
3075.16	0.0919362	3224.76	0.128934	3224.76	0.113002	3224.76	0.128411
3073.84	0.0963164	3223.66	0.10442	3223.66	0.142169	3223.66	0.108466
3072.52	0.0857741	3222.56	0.166037	3222.56	0.164784	3222.56	0.0686255
3071.2	0.0741308	3221.47	0.0885376	3221.47	0.172443	3221.47	0.12829
3069.87	0.0945311	3220.37	0.108188	3220.37	0.175425	3220.37	0.148144
3068.55	0.0878614	3219.28	0.114602	3219.28	0.171868	3219.28	0.118263
3067.23	0.0999684	3218.18	0.138659	3218.18	0.127211	3218.18	0.138113
3065.91	0.0905399	3217.08	0.127411	3217.08	0.138601	3217.08	0.118186
3064.58	0.0893942	3215.98	0.160288	3215.98	0.121978	3215.98	0.118147
3063.26	0.0910085	3214.89	0.0718273	3214.89	0.132436	3214.89	0.108169
3061.94	0.0926223	3213.79	0.126753	3213.79	0.102749	3213.79	0.167759
3060.61	0.0887187	3212.69	0.18167	3212.69	0.126269	3212.69	0.118031
3059.29	0.0997083	3211.59	0.177035	3211.59	0.148847	3211.59	0.127927
3057.96	0.0974594	3210.5	0.167985	3210.5	0.211542	3210.5	0.0881543
3056.64	0.0913519	3209.4	0.169964	3209.4	0.163205	3209.4	0.098052
3055.31	0.106193	3208.3	0.114648	3208.3	0.112085	3208.3	0.187384
3053.99	0.0973308	3207.2	0.140874	3207.2	0.0544544	3207.2	0.15755
3052.66	0.0994918	3206.1	0.127437	3206.1	0.103132	3206.1	0.157505
3051.34	0.0983467	3205	0.109595	3205	0.117301	3205	0.167385
3050.01	0.091694	3203.9	0.135811	3203.9	0.179002	3203.9	0.127644
3048.68	0.0999128	3202.8	0.153205	3202.8	0.138172	3202.8	0.107761
3047.36	0.0855541	3201.7	0.0561069	3201.7	0.0582196	3201.7	0.187085
3046.03	0.0926696	3200.6	0.10653	3200.6	0.107786	3200.6	0.107687
3044.7	0.0970307	3199.5	0.185558	3199.5	0.122877	3199.5	0.167151
3043.37	0.0843318	3198.4	0.139112	3198.4	0.140755	3198.4	0.127443
3042.05	0.100796	3197.3	0.152091	3197.3	0.108342	3197.3	0.226539
3040.72	0.0985524	3196.2	0.171673	3196.2	0.0889738	3196.2	0.0579778
3039.39	0.0979593	3195.1	0.13185	3195.1	0.118018	3195.1	0.0876805
3038.06	0.108913	3194	0.147028	3194	0.121922	3194	0.117373
3036.73	0.0989729	3192.9	0.129214	3192.9	0.160256	3192.9	0.0677983
3035.4	0.104426	3191.8	0.0784397	3191.8	0.146477	3191.8	0.0875789
3034.07	0.105481	3190.7	0.0826264	3190.7	0.0861864	3190.7	0.077641
3032.75	0.100491	3189.6	0.126369	3189.6	0.149621	3189.6	0.117218
3031.42	0.115829	3188.5	0.165705	3188.5	0.187922	3188.5	0.11718
3030.09	0.115233	3187.39	0.101761	3187.39	0.117426	3187.39	0.0775446
3028.76	0.123423	3186.29	0.0642042	3186.29	0.115748	3186.29	0.0973073
3027.42	0.114042	3185.19	0.182603	3185.19	0.162401	3185.19	0.117064
3026.09	0.120583	3184.09	0.14065	3184.09	0.0631351	3184.09	0.156603
3024.76	0.108462	3182.99	0.120668	3182.99	0.132085	3182.99	0.107094
3023.43	0.125974	3181.88	0.0677626	3181.88	0.106248	3181.88	0.116948
3022.1	0.107275	3180.78	0.124625	3180.78	0.165879	3180.78	0.156467
3020.77	0.112166	3179.68	0.12002	3179.68	0.0573889	3179.68	0.106983
3019.44	0.112669	3178.57	0.100047	3178.57	0.130005	3178.57	0.0871736
3018.1	0.109333	3177.47	0.0515771	3177.47	0.0893308	3177.47	0.126678
3016.77	0.103258	3176.37	0.141295	3176.37	0.107151	3176.37	0.185937
3015.44	0.110887	3175.26	0.101607	3175.26	0.166727	3175.26	0.13648
3014.11	0.123444	3174.16	0.127697	3174.16	0.0898767	3174.16	0.0870383
3012.77	0.108057	3173.05	0.0880191	3173.05	0.0789233	3173.05	0.146274
3011.44	0.115132	3171.95	0.120684	3171.95	0.106009	3171.95	0.0770944
3010.1	0.108514	3170.85	0.205947	3170.85	0.108044	3170.85	0.136312
3008.77	0.119967	3169.74	0.144356	3169.74	0.0831819	3169.74	0.0967768
3007.44	0.119372	3168.64	0.0871717	3168.64	0.163106	3168.64	0.116485
3006.1	0.118777	3167.53	0.135155	3167.53	0.113214	3167.53	0.155927
3004.77	0.125844	3166.43	0.110844	3166.43	0.163445	3166.43	0.0868023
3003.43	0.126342	3165.32	0.106248	3165.32	0.1321	3165.32	0.0275662
3002.1	0.133951	3164.21	0.165144	3164.21	0.166556	3164.21	0.0966001
3000.76	0.132261	3163.11	0.167114	3163.11	0.155608	3163.11	0.145884
2999.42	0.12729	3162	0.109977	3162	0.152998	3162	0.106392
2998.09	0.129974	3160.9	0.0834976	3160.9	0.123528	3160.9	0.0866334
2996.75	0.127739	3159.79	0.157683	3159.79	0.180187	3159.79	0.106318
2995.41	0.12769	3158.68	0.0787017	3158.68	0.0599907	3158.68	0.165425
2994.08	0.132012	3157.58	0.10911	3157.58	0.0842404	3157.58	0.1161
2992.74	0.142887	3156.47	0.146074	3156.47	0.108484	3156.47	0.185041
2991.4	0.138466	3155.36	0.154608	3155.36	0.0994035	3155.36	0.116023
2990.06	0.126403	3154.26	0.0734871	3154.26	0.106061	3154.26	0.145537
2988.73	0.142186	3153.15	0.0842098	3153.15	0.119183	3153.15	0.125795
2987.39	0.144863	3152.04	0.15612	3152.04	0.166531	3152.04	0.125755
2986.05	0.134988	3150.93	0.120935	3150.93	0.0982553	3150.93	0.125715
2984.71	0.139302	3149.83	0.0398718	3149.83	0.118776	3149.83	0.105986
2983.37	0.145797	3148.72	0.133608	3148.72	0.155002	3148.72	0.086263
2982.03	0.142473	3147.61	0.0678629	3147.61	0.0544145	3147.61	0.115753
2980.69	0.139149	3146.5	0.133169	3146.5	0.120211	3146.5	0.174753
2979.35	0.146731	3145.39	0.108926	3145.39	0.161965	3145.39	0.145191
2978.01	0.151039	3144.28	0.113074	3144.28	0.115934	3144.28	0.125474
2976.67	0.150985	3143.17	0.18053	3143.17	0.120725	3143.17	0.184444
2975.33	0.146573	3142.06	0.186847	3142.06	0.139366	3142.06	0.086061
2973.99	0.14761	3140.96	0.151701	3140.96	0.0887429	3140.96	0.164681
2972.65	0.158995	3139.85	0.114395	3139.85	0.15724	3139.85	0.105654
2971.31	0.144237	3138.74	0.116355	3138.74	0.132481	3138.74	0.194074
2969.97	0.155618	3137.63	0.122681	3137.63	0.140952	3137.63	0.0859262
2968.63	0.15883	3136.52	0.0614102	3136.52	0.129121	3136.52	0.0760673
2967.28	0.16966	3135.41	0.115707	3135.41	0.135748	3135.41	0.056388
2965.94	0.150014	3134.29	0.113309	3134.29	0.146983	3134.29	0.125114
2964.6	0.160297	3133.18	0.134886	3133.18	0.17205	3133.18	0.154535
2963.25	0.168944	3132.07	0.0889046	3132.07	0.133473	3132.07	0.174128
2961.91	0.172693	3130.96	0.121376	3130.96	0.150238	3130.96	0.105359
2960.57	0.162306	3129.85	0.145122	3129.85	0.183591	3129.85	0.115138
2959.22	0.155727	3128.74	0.110044	3128.74	0.133047	3128.74	0.1151
2957.88	0.167086	3127.63	0.0401448	3127.63	0.128602	3127.63	0.183749
2956.54	0.176267	3126.52	0.172758	3126.52	0.114948	3126.52	0.075779
2955.19	0.180012	3125.4	0.10069	3125.4	0.0837853	3125.4	0.0757471
2953.85	0.164743	3124.29	0.15489	3124.29	0.167785	3124.29	0.114946
2952.5	0.164144	3123.18	0.119851	3123.18	0.211236	3123.18	0.0658769
2951.16	0.184719	3122.07	0.0848109	3122.07	0.127581	3122.07	0.0952602
2949.81	0.156432	3120.96	0.0606744	3120.96	0.139715	3120.96	0.0952249
2948.47	0.174289	3119.84	0.110497	3119.84	0.132514	3119.84	0.114793
2947.12	0.173687	3118.73	0.116804	3118.73	0.107824	3118.73	0.193152
2945.77	0.167119	3117.62	0.0752674	3117.62	0.150324	3117.62	0.0853211
2944.43	0.162723	3116.5	0.118545	3116.5	0.150482	3116.5	0.144067
2943.08	0.17731	3115.39	0.111799	3115.39	0.1534	3115.39	0.114639
2941.73	0.194604	3114.28	0.0746387	3114.28	0.133321	3114.28	0.0950137
2940.38	0.177736	3113.16	0.100506	3113.16	0.157394	3113.16	0.212479
2939.04	0.17605	3112.05	0.0481429	3112.05	0.146519	3112.05	0.153684
2937.69	0.182496	3110.93	0.0631356	3110.93	0.121852	3110.93	0.124274
2936.34	0.188936	3109.82	0.121577	3109.82	0.131208	3109.82	0.222103
2934.99	0.176959	3108.7	0.0866143	3108.7	0.106549	3108.7	0.133979
2933.64	0.176901	3107.59	0.151543	3107.59	0.160933	3107.59	0.173073
2932.29	0.174674	3106.47	0.0471044	3106.47	0.14547	3106.47	0.173025
2930.95	0.183279	3105.36	0.157611	3105.36	0.14195	3105.36	0.153416
2929.6	0.177806	3104.24	0.111804	3104.24	0.155885	3104.24	0.114255
2928.25	0.180994	3103.13	0.131116	3103.13	0.198287	3103.13	0.0751075
2926.9	0.17769	3102.01	0.102689	3102.01	0.145176	3102.01	0.0946272
2925.55	0.185745	3100.9	0.113325	3100.9	0.136153	3100.9	0.11414
2924.2	0.165673	3099.78	0.0957534	3099.78	0.163849	3099.78	0.114102
2922.84	0.173728	3098.66	0.110717	3098.66	0.126372	3098.66	0.114064
2921.49	0.158531	3097.55	0.110508	3097.55	0.21095	3097.55	0.162872
2920.14	0.168205	3096.43	0.1298	3096.43	0.112012	3096.43	0.211665
2918.79	0.176795	3095.31	0.081891	3095.31	0.129598	3095.31	0.113949
2917.44	0.186464	3094.2	0.0535037	3094.2	0.190289	3094.2	0.13344
2916.09	0.169117	3093.08	0.137808	3093.08	0.0620551	3093.08	0.0748204
2914.73	0.17986	3091.96	0.0639294	3091.96	0.122736	3091.96	0.162641
2913.38	0.168462	3090.84	0.113539	3090.84	0.114645	3090.84	0.162595
2912.03	0.180281	3089.73	0.117648	3089.73	0.156964	3089.73	0.182065
2910.68	0.182382	3088.61	0.0416394	3088.61	0.119545	3088.61	0.182015
2909.32	0.166131	3087.49	0.154015	3087.49	0.139856	3087.49	0.113681
2907.97	0.184962	3086.37	0.108334	3086.37	0.182154	3086.37	0.103889
2906.61	0.156847	3085.25	0.138422	3085.25	0.118183	3085.25	0.191619
2905.26	0.170277	3084.14	0.0949196	3084.14	0.120171	3084.14	0.152567
2903.91	0.179387	3083.02	0.101198	3083.02	0.10293	3083.02	0.201265
2902.55	0.153987	3081.9	0.107466	3081.9	0.170835	3081.9	0.132984
2901.2	0.164175	3080.78	0.100769	3080.78	0.166407	3080.78	0.0939605
2899.84	0.172202	3079.66	0.111365	3079.66	0.156489	3079.66	0.0841815
2898.48	0.156518	3078.54	0.132768	3078.54	0.143825	3078.54	0.152344
2897.13	0.16239	3077.42	0.117414	3077.42	0.124764	3077.42	0.142559
2895.77	0.149945	3076.3	0.132329	3076.3	0.151448	3076.3	0.220428
2894.42	0.150968	3075.18	0.166688	3075.18	0.168059	3075.18	0.122998
2893.06	0.161684	3074.06	0.147006	3074.06	0.144429	3074.06	0.171637
2891.7	0.159475	3072.94	0.0646933	3072.94	0.184808	3072.94	0.0839808
2890.35	0.166955	3071.82	0.161683	3071.82	0.163014	3071.82	0.161809
2888.99	0.151292	3070.7	0.0837079	3070.7	0.166815	3070.7	0.103376
2887.63	0.162537	3069.58	0.133163	3069.58	0.132235	3069.58	0.0936102
2886.27	0.175928	3068.45	0.17828	3068.45	0.218272	3068.45	0.113031
2884.91	0.166728	3067.33	0.106812	3067.33	0.129796	3067.33	0.171351
2883.56	0.154841	3066.21	0.128186	3066.21	0.220375	3066.21	0.10323
2882.2	0.157475	3065.09	0.121489	3065.09	0.0835188	3065.09	0.0934701
2880.84	0.15957	3063.97	0.121269	3063.97	0.183208	3063.97	0.200372
2879.48	0.150916	3062.85	0.0498597	3062.85	0.154135	3062.85	0.17116
2878.12	0.135281	3061.72	0.142404	3061.72	0.104075	3061.72	0.141957
2876.76	0.15618	3060.6	0.105515	3060.6	0.213751	3060.6	0.12248
2875.4	0.159348	3059.48	0.0815817	3059.48	0.173733	3059.48	0.10301
2874.04	0.159293	3058.36	0.154663	3058.36	0.138297	3058.36	0.132115
2872.68	0.158164	3057.23	0.16953	3057.23	0.144825	3057.23	0.141785
2871.32	0.153815	3056.11	0.0831022	3056.11	0.131292	3056.11	0.0543483
2869.96	0.157517	3054.99	0.17554	3054.99	0.238136	3054.99	0.112573
2868.6	0.143511	3053.86	0.162384	3053.86	0.135233	3053.86	0.122242
2867.23	0.156871	3052.74	0.123384	3052.74	0.189169	3052.74	0.0833796
2865.87	0.13858	3051.61	0.0887121	3051.61	0.0981582	3051.61	0.14157
2864.51	0.149789	3050.49	0.150939	3050.49	0.136587	3050.49	0.141528
2863.15	0.146519	3049.37	0.124885	3049.37	0.20416	3049.37	0.151186
2861.79	0.150755	3048.24	0.137573	3048.24	0.203382	3048.24	0.141442
2860.42	0.148557	3047.12	0.0900035	3047.12	0.200787	3047.12	0.122004
2859.06	0.152791	3045.99	0.147892	3045.99	0.0898111	3045.99	0.160748
2857.7	0.142557	3044.87	0.130456	3044.87	0.135493	3044.87	0.121924
2856.33	0.136078	3043.74	0.179717	3043.74	0.222128	3043.74	0.102499
2854.97	0.154234	3042.62	0.127868	3042.62	0.143975	3042.62	0.179993
2853.6	0.148291	3041.49	0.11904	3041.49	0.194175	3041.49	0.170254
2852.24	0.142884	3040.36	0.153225	3040.36	0.220697	3040.36	0.189582
2850.87	0.140156	3039.24	0.114302	3039.24	0.117108	3039.24	0.160472
2849.51	0.157763	3038.11	0.118382	3038.11	0.226417	3038.11	0.141056
2848.14	0.153427	3036.99	0.13321	3036.99	0.187436	3036.99	0.16038
2846.78	0.143745	3035.86	0.160926	3035.86	0.191207	3035.86	0.14097
2845.41	0.139415	3034.73	0.0919468	3034.73	0.216799	3034.73	0.189328
2844.05	0.138294	3033.61	0.192693	3033.61	0.231476	3033.61	0.140884
2842.68	0.15321	3032.48	0.128033	3032.48	0.195247	3032.48	0.160196
2841.31	0.156363	3031.35	0.110626	3031.35	0.191743	3031.35	0.140799
2839.95	0.130124	3030.22	0.181267	3030.22	0.2264	3030.22	0.189126
2838.58	0.155185	3029.1	0.123075	3029.1	0.152033	3029.1	0.140713
2837.21	0.162074	3027.97	0.105678	3027.97	0.171249	3027.97	0.131
2835.84	0.137986	3026.84	0.154822	3026.84	0.197718	3026.84	0.130958
2834.48	0.141672	3025.71	0.105248	3025.71	0.209656	3025.71	0.101915
2833.11	0.14856	3024.58	0.167243	3024.58	0.192531	3024.58	0.208204
2831.74	0.142102	3023.45	0.19919	3023.45	0.184496	3023.45	0.179157
2830.37	0.144718	3022.33	0.158215	3022.33	0.177368	3022.33	0.179108
2829	0.135595	3021.2	0.138687	3021.2	0.182036	3021.2	0.198381
2827.63	0.155281	3020.07	0.159906	3020.07	0.221184	3020.07	0.188669
2826.26	0.149893	3018.94	0.181115	3018.94	0.150553	3018.94	0.13067
2824.89	0.147174	3017.81	0.165877	3017.81	0.147058	3017.81	0.140285
2823.52	0.142322	3016.68	0.148509	3016.68	0.157172	3016.68	0.207827
2822.15	0.156662	3015.55	0.156859	3015.55	0.175441	3015.55	0.16916
2820.78	0.143817	3014.42	0.120212	3014.42	0.190079	3014.42	0.111202
2819.41	0.145896	3013.29	0.16069	3013.29	0.1186	3013.29	0.111164
2818.04	0.158095	3012.16	0.18188	3012.16	0.184897	3012.16	0.169017
2816.67	0.143127	3011.03	0.0681746	3011.03	0.142443	3011.03	0.140029
2815.3	0.154789	3009.9	0.0829445	3009.9	0.205994	3009.9	0.217149
2813.92	0.151008	3008.77	0.157643	3008.77	0.188004	3008.77	0.178519
2812.55	0.169053	3007.63	0.112475	3007.63	0.180885	3007.63	0.178469
2811.18	0.139724	3006.5	0.157194	3006.5	0.208178	3006.5	0.082014
2809.81	0.168936	3005.37	0.141995	3005.37	0.201966	3005.37	0.197649
2808.43	0.15292	3004.24	0.139626	3004.24	0.298046	3004.24	0.168685
2807.06	0.157121	3003.11	0.132986	3003.11	0.22394	3003.11	0.226453
2805.69	0.145899	3001.98	0.162707	3001.98	0.199627	3001.98	0.0915155
2804.31	0.151694	3000.84	0.220199	3000.84	0.145464	3000.84	0.130012
2802.94	0.163334	2999.71	0.177209	2999.71	0.113939	2999.71	0.149233
2801.56	0.157432	2998.58	0.174849	2998.58	0.220805	2998.58	0.158818
2800.19	0.146218	2997.45	0.116919	2997.45	0.161238	2997.45	0.158772
2798.81	0.146165	2996.31	0.14448	2996.31	0.0971738	2996.31	0.139474
2797.44	0.158329	2995.18	0.210473	2995.18	0.201274	2995.18	0.139431
2796.06	0.156149	2994.05	0.178203	2994.05	0.167954	2994.05	0.100895
2794.69	0.167244	2992.91	0.152352	2992.91	0.174411	2992.91	0.139345
2793.31	0.176211	2991.78	0.126501	2991.78	0.146525	2991.78	0.100822
2791.93	0.158107	2990.64	0.209537	2990.64	0.234289	2990.64	0.196971
2790.56	0.153276	2989.51	0.132463	2989.51	0.239826	2989.51	0.148834
2789.18	0.167545	2988.38	0.172786	2988.38	0.248973	2988.38	0.206482
2787.8	0.161124	2987.24	0.187498	2987.24	0.223803	2987.24	0.225656
2786.43	0.167431	2986.11	0.144595	2986.11	0.19774	2986.11	0.148702
2785.05	0.164193	2984.97	0.140105	2984.97	0.188834	2984.97	0.139047
2783.67	0.183749	2983.84	0.131355	2983.84	0.170906	2983.84	0.225485
2782.29	0.16249	2982.7	0.229216	2982.7	0.26217	2982.7	0.148569
2780.91	0.167203	2981.57	0.214055	2981.57	0.219875	2981.57	0.186948
2779.53	0.171384	2980.43	0.183973	2980.43	0.111742	2980.43	0.196502
2778.16	0.173444	2979.29	0.168822	2979.29	0.234539	2979.29	0.148436
2776.78	0.18133	2978.16	0.132378	2978.16	0.229245	2978.16	0.186797
2775.4	0.175974	2977.02	0.179024	2977.02	0.164439	2977.02	0.215545
2774.02	0.173269	2975.89	0.191577	2975.89	0.205132	2975.89	0.205891
2772.64	0.18803	2974.75	0.131709	2974.75	0.245811	2974.75	0.157856
2771.26	0.186911	2973.61	0.167685	2973.61	0.249526	2973.61	0.138621
2769.88	0.191612	2972.47	0.26327	2972.47	0.289283	2972.47	0.186544
2768.49	0.187317	2971.34	0.162976	2971.34	0.155154	2971.34	0.148127
2767.11	0.192015	2970.2	0.152105	2970.2	0.267874	2970.2	0.243984
2765.73	0.194598	2969.06	0.136983	2969.06	0.22655	2969.06	0.186393
2764.35	0.197707	2967.93	0.219738	2967.93	0.215859	2967.93	0.215103
2762.97	0.204515	2966.79	0.168449	2966.79	0.224975	2966.79	0.138365
2761.59	0.19494	2965.65	0.191614	2965.65	0.214286	2965.65	0.23416
2760.2	0.200687	2964.51	0.195636	2964.51	0.2099	2964.51	0.205355
2758.82	0.202738	2963.37	0.135865	2963.37	0.208214	2963.37	0.186141
2757.44	0.196863	2962.23	0.233435	2962.23	0.215528	2962.23	0.195669
2756.05	0.22637	2961.09	0.192808	2961.09	0.283109	2961.09	0.14773
2754.67	0.212047	2959.96	0.20108	2959.96	0.258031	2959.96	0.224293
2753.29	0.217789	2958.82	0.213594	2958.82	0.21587	2958.82	0.214662
2751.9	0.227221	2957.68	0.153872	2957.68	0.247451	2957.68	0.176316
2750.52	0.242452	2956.54	0.166395	2956.54	0.24486	2956.54	0.329403
2749.13	0.224445	2955.4	0.238373	2955.4	0.242273	2955.4	0.204927
2747.75	0.241251	2954.26	0.233883	2954.26	0.310678	2954.26	0.147465
2746.36	0.222724	2953.12	0.152964	2953.12	0.247876	2953.12	0.195253
2744.98	0.237947	2951.98	0.163357	2951.98	0.186893	2951.98	0.176071
2743.59	0.24209	2950.84	0.220432	2950.84	0.207668	2950.84	0.252529
2742.21	0.256249	2949.7	0.226565	2949.7	0.197901	2949.7	0.195097
2740.82	0.270925	2948.56	0.251783	2948.56	0.267155	2948.56	0.261966
2739.43	0.261894	2947.41	0.158198	2947.41	0.260074	2947.41	0.261903
2738.05	0.273403	2946.27	0.136763	2946.27	0.335577	2946.27	0.194941
2736.66	0.280173	2945.13	0.236211	2945.13	0.270152	2945.13	0.175779
2735.27	0.294835	2943.99	0.233852	2943.99	0.272946	2943.99	0.194838
2733.88	0.280012	2942.85	0.216658	2942.85	0.28112	2942.85	0.21389
2732.5	0.294668	2941.71	0.256691	2941.71	0.274041	2941.71	0.290241
2731.11	0.291431	2940.56	0.156842	2940.56	0.304633	2940.56	0.242427
2729.72	0.316074	2939.42	0.192633	2939.42	0.25451	2939.42	0.299653
2728.33	0.306519	2938.28	0.198756	2938.28	0.260889	2938.28	0.232762
2726.94	0.323787	2937.14	0.168867	2937.14	0.269059	2937.14	0.299515
2725.55	0.322648	2935.99	0.172879	2935.99	0.193862	2935.99	0.21356
2724.16	0.315726	2934.85	0.212883	2934.85	0.262083	2934.85	0.280294
2722.77	0.35243	2933.71	0.153364	2933.71	0.288169	2933.71	0.184831
2721.38	0.344453	2932.56	0.184886	2932.56	0.289158	2932.56	0.222933
2719.99	0.360123	2931.42	0.210055	2931.42	0.296422	2931.42	0.232413
2718.6	0.339542	2930.27	0.118824	2930.27	0.230237	2930.27	0.20375
2717.21	0.345228	2929.13	0.207466	2929.13	0.280489	2929.13	0.165563
2715.82	0.35406	2927.99	0.209347	2927.99	0.325347	2927.99	0.108325
2714.43	0.382312	2926.84	0.171044	2926.84	0.252929	2926.84	0.194059
2713.04	0.370668	2925.7	0.196184	2925.7	0.250342	2925.7	0.241651
2711.64	0.36952	2924.55	0.217103	2924.55	0.24865	2924.55	0.241591
2710.25	0.389882	2923.41	0.244344	2923.41	0.231753	2923.41	0.298685
2708.86	0.374572	2922.26	0.161663	2922.26	0.333833	2922.26	0.174804
2707.47	0.392827	2921.12	0.172008	2921.12	0.331234	2921.12	0.279502
2706.07	0.380667	2919.97	0.205582	2919.97	0.258886	2919.97	0.222311
2704.68	0.396819	2918.83	0.152532	2918.83	0.210701	2918.83	0.203216
2703.28	0.403004	2917.68	0.203003	2917.68	0.279641	2917.68	0.203162
2701.89	0.402376	2916.53	0.226003	2916.53	0.291349	2916.53	0.29827
2700.5	0.436328	2915.39	0.221542	2915.39	0.279825	2915.39	0.241114
2699.1	0.418931	2914.24	0.269864	2914.24	0.200395	2914.24	0.288619
2697.71	0.400494	2913.09	0.240062	2913.09	0.209432	2913.09	0.212461
2696.31	0.425	2911.95	0.136398	2911.95	0.249729	2911.95	0.212406
2694.92	0.433269	2910.8	0.131956	2910.8	0.20428	2910.8	0.240875
2693.52	0.406467	2909.65	0.262545	2909.65	0.294571	2909.65	0.164762
2692.13	0.413163	2908.5	0.207451	2908.5	0.225914	2908.5	0.240756
2690.73	0.416196	2907.36	0.148165	2907.36	0.269753	2907.36	0.183675
2689.33	0.410861	2906.21	0.175348	2906.21	0.177025	2906.21	0.136115
2687.94	0.416509	2905.06	0.196209	2905.06	0.255657	2905.06	0.202576
2686.54	0.396009	2903.91	0.214948	2903.91	0.213818	2903.91	0.202522
2685.14	0.412635	2902.76	0.225244	2902.76	0.282607	2902.76	0.192972
2683.74	0.406256	2901.62	0.180754	2901.62	0.205101	2901.62	0.249895
2682.35	0.392044	2900.47	0.203696	2900.47	0.222145	2900.47	0.221351
2680.95	0.382537	2899.32	0.159224	2899.32	0.290897	2899.32	0.221295
2679.55	0.395498	2898.17	0.226399	2898.17	0.261569	2898.17	0.173783
2678.15	0.391217	2897.02	0.181927	2897.02	0.247399	2897.02	0.268629
2676.75	0.390069	2895.87	0.192233	2895.87	0.259075	2895.87	0.221125
2675.35	0.383182	2894.72	0.158306	2894.72	0.195012	2894.72	0.145178
2673.95	0.366379	2893.57	0.185451	2893.57	0.229858	2893.57	0.183073
2672.55	0.380895	2892.42	0.193636	2892.42	0.188092	2892.42	0.183024
2671.15	0.376623	2891.27	0.166042	2891.27	0.152572	2891.27	0.192455
2669.75	0.341573	2890.12	0.151085	2890.12	0.244391	2890.12	0.220844
2668.35	0.351913	2888.97	0.176099	2888.97	0.216887	2888.97	0.135481
2666.95	0.329917	2887.82	0.150635	2887.82	0.18939	2887.82	0.211254
2665.55	0.349117	2886.67	0.106241	2886.67	0.209959	2886.67	0.23015
2664.15	0.341727	2885.51	0.164895	2885.51	0.226964	2885.51	0.182723
2662.75	0.315057	2884.36	0.175181	2884.36	0.155882	2884.36	0.154256
2661.35	0.302987	2883.21	0.151828	2883.21	0.272518	2883.21	0.154211
2659.94	0.316448	2882.06	0.181026	2882.06	0.281501	2882.06	0.144696
2658.54	0.321047	2880.91	0.132458	2880.91	0.184655	2880.91	0.210925
2657.14	0.308982	2879.75	0.207873	2879.75	0.202538	2879.75	0.173006
2655.73	0.297444	2878.6	0.144616	2878.6	0.207079	2878.6	0.163494
2654.33	0.286952	2877.45	0.163298	2877.45	0.212509	2877.45	0.248613
2652.93	0.295717	2876.3	0.0790674	2876.3	0.220604	2876.3	0.153938
2651.52	0.286788	2875.14	0.185933	2875.14	0.178935	2875.14	0.220111
2650.12	0.253935	2873.99	0.152113	2873.99	0.173702	2873.99	0.229513
2648.72	0.260103	2872.84	0.187565	2872.84	0.167589	2872.84	0.182172
2647.31	0.273546	2871.68	0.134873	2871.68	0.215644	2871.68	0.219943
2645.91	0.250592	2870.53	0.14514	2870.53	0.221066	2870.53	0.172619
2644.5	0.249999	2869.38	0.186867	2869.38	0.217608	2869.38	0.21983
2643.09	0.232775	2868.22	0.19083	2868.22	0.138697	2868.22	0.200873
2641.69	0.239977	2867.07	0.196885	2867.07	0.203589	2867.07	0.163025
2640.28	0.238867	2865.91	0.144231	2865.91	0.182389	2865.91	0.144083
2638.88	0.223215	2864.76	0.18593	2864.76	0.202892	2864.76	0.14404
2637.47	0.218473	2863.6	0.219242	2863.6	0.13734	2863.6	0.210105
2636.06	0.234499	2862.45	0.103735	2862.45	0.162281	2862.45	0.143952
2634.66	0.230277	2861.29	0.143332	2861.29	0.132229	2861.29	0.200554
2633.25	0.20789	2860.14	0.178717	2860.14	0.165141	2860.14	0.124986
2631.84	0.230654	2858.98	0.149158	2858.98	0.178536	2858.98	0.181573
2630.43	0.219171	2857.83	0.157314	2857.83	0.199903	2857.83	0.16265
2629.02	0.185909	2856.67	0.211522	2856.67	0.158345	2856.67	0.172038
2627.61	0.18533	2855.51	0.196633	2855.51	0.110598	2855.51	0.200289
2626.21	0.189935	2854.36	0.13569	2854.36	0.19398	2854.36	0.219099
2624.8	0.197129	2853.2	0.175239	2853.2	0.163957	2853.2	0.162463
2623.39	0.188772	2852.04	0.131057	2852.04	0.156084	2852.04	0.237844
2621.98	0.176793	2850.89	0.0910788	2850.89	0.146442	2850.89	0.200077
2620.57	0.184506	2849.73	0.157808	2849.73	0.204971	2849.73	0.181173
2619.16	0.177193	2848.57	0.163853	2848.57	0.159037	2848.57	0.181123
2617.75	0.19215	2847.41	0.134342	2847.41	0.194532	2847.41	0.190495
2616.34	0.179145	2846.26	0.175943	2846.26	0.176042	2846.26	0.237547
2614.92	0.159414	2845.1	0.165256	2845.1	0.183213	2845.1	0.190393
2613.51	0.167638	2843.94	0.0793306	2843.94	0.124926	2843.94	0.15267
2612.1	0.169134	2842.78	0.110465	2842.78	0.235578	2842.78	0.199706
2610.69	0.172696	2841.62	0.139488	2841.62	0.204711	2841.62	0.180823
2609.28	0.150397	2840.46	0.160154	2840.46	0.166783	2840.46	0.152535
2607.86	0.167925	2839.31	0.126508	2839.31	0.232293	2839.31	0.105433
2606.45	0.16735	2838.15	0.1409	2838.15	0.140458	2838.15	0.143035
2605.04	0.147132	2836.99	0.159475	2836.99	0.208601	2836.99	0.161808
2603.63	0.156898	2835.83	0.107054	2835.83	0.205153	2835.83	0.133541
2602.21	0.150642	2834.67	0.171536	2834.67	0.205238	2834.67	0.171119
2600.8	0.155237	2833.51	0.104522	2833.51	0.199143	2833.51	0.161668
2599.38	0.156215	2832.35	0.123078	2832.35	0.189516	2832.35	0.180425
2597.97	0.143765	2831.19	0.13746	2831.19	0.140159	2831.19	0.161574
2596.55	0.158169	2830.03	0.160179	2830.03	0.180863	2830.03	0.105134
2595.14	0.14211	2828.87	0.0932136	2828.87	0.169482	2828.87	0.105097
2593.72	0.155993	2827.71	0.115933	2827.71	0.176631	2827.71	0.152038
2592.31	0.134265	2826.54	0.1595	2826.54	0.141427	2826.54	0.142599
2590.89	0.136793	2825.38	0.132167	2825.38	0.234154	2825.38	0.180126
2589.48	0.148089	2824.22	0.119437	2824.22	0.236882	2824.22	0.0767741
2588.06	0.134627	2823.06	0.0858682	2823.06	0.146119	2823.06	0.133078
2586.64	0.151075	2821.9	0.129406	2821.9	0.136517	2821.9	0.236304
2585.23	0.129885	2820.74	0.166689	2820.74	0.211549	2820.74	0.179926
2583.81	0.139112	2819.57	0.158122	2819.57	0.246009	2819.57	0.142337
2582.39	0.129784	2818.41	0.122491	2818.41	0.199373	2818.41	0.179827
2580.97	0.125612	2817.25	0.147253	2817.25	0.150111	2817.25	0.151632
2579.56	0.1405	2816.09	0.192825	2816.09	0.192495	2816.09	0.198488
2578.14	0.116758	2814.92	0.184268	2814.92	0.216362	2814.92	0.123406
2576.72	0.133702	2813.76	0.132001	2813.76	0.168001	2813.76	0.132742
2575.3	0.138284	2812.6	0.167153	2812.6	0.220929	2812.6	0.245207
2573.88	0.133085	2811.43	0.0961886	2811.43	0.168177	2811.43	0.217024
2572.46	0.121198	2810.27	0.175012	2810.27	0.185875	2810.27	0.30132
2571.04	0.134526	2809.11	0.153983	2809.11	0.163073	2809.11	0.216913
2569.62	0.120587	2807.94	0.0976105	2807.94	0.196603	2807.94	0.188749
2568.2	0.122595	2806.78	0.178477	2806.78	0.16149	2806.78	0.207433
2566.78	0.119461	2805.61	0.163693	2805.61	0.204684	2805.61	0.113716
2565.36	0.115814	2804.45	0.14891	2804.45	0.1731	2804.45	0.226053
2563.94	0.128616	2803.28	0.11751	2803.28	0.17758	2803.28	0.151091
2562.52	0.123941	2802.12	0.140142	2802.12	0.175906	2802.12	0.179131
2561.09	0.121323	2800.95	0.135768	2800.95	0.186541	2800.95	0.160361
2559.67	0.109974	2799.79	0.183315	2799.79	0.158494	2799.79	0.169673
2558.25	0.126875	2798.62	0.160233	2798.62	0.223615	2798.62	0.113483
2556.83	0.121177	2797.46	0.164158	2797.46	0.125276	2797.46	0.225709
2555.4	0.120615	2796.29	0.14524	2796.29	0.202683	2796.29	0.253712
2553.98	0.121593	2795.12	0.182377	2795.12	0.186071	2795.12	0.150776
2552.56	0.115386	2793.96	0.177993	2793.96	0.289788	2793.96	0.216186
2551.13	0.11893	2792.79	0.125891	2792.79	0.193258	2792.79	0.160035
2549.71	0.124011	2791.62	0.14433	2791.62	0.215285	2791.62	0.234769
2548.29	0.117295	2790.46	0.150327	2790.46	0.236433	2790.46	0.262748
2546.86	0.11417	2789.29	0.166694	2789.29	0.209294	2789.29	0.159895
2545.44	0.111047	2788.12	0.172681	2788.12	0.185674	2788.12	0.225249
2544.01	0.132014	2786.95	0.0915971	2786.95	0.226118	2786.95	0.0944125
2542.59	0.111466	2785.79	0.221973	2785.79	0.22619	2785.79	0.197115
2541.16	0.119104	2784.62	0.120177	2784.62	0.213106	2784.62	0.178386
2539.73	0.106762	2783.45	0.186257	2783.45	0.235982	2783.45	0.178336
2538.31	0.111837	2782.28	0.148738	2782.28	0.20799	2782.28	0.206292
2536.88	0.116399	2781.11	0.10293	2781.11	0.172122	2781.11	0.215571
2535.45	0.12147	2779.94	0.181414	2779.94	0.21077	2779.94	0.23418
2534.03	0.118351	2778.77	0.154265	2778.77	0.250279	2778.77	0.262112
2532.6	0.12649	2777.61	0.135396	2777.61	0.203033	2777.61	0.15943
2531.17	0.104952	2776.44	0.0937707	2776.44	0.203985	2776.44	0.224675
2529.74	0.111556	2775.27	0.182548	2775.27	0.225955	2775.27	0.215292
2528.32	0.108952	2774.1	0.186453	2774.1	0.212014	2774.1	0.289831
2526.89	0.116576	2772.93	0.235878	2772.93	0.198074	2772.93	0.233826
2525.46	0.125219	2771.76	0.169435	2771.76	0.25243	2771.76	0.215125
2524.03	0.115969	2770.59	0.167143	2770.59	0.22711	2770.59	0.233708
2522.6	0.102634	2769.42	0.144158	2769.42	0.206174	2769.42	0.196377
2521.17	0.100545	2768.25	0.195626	2768.25	0.225497	2768.25	0.168375
2519.74	0.117869	2767.07	0.151977	2767.07	0.200191	2767.07	0.214902
2518.31	0.114756	2765.9	0.124877	2765.9	0.264124	2765.9	0.270727
2516.88	0.108581	2764.73	0.18872	2764.73	0.193341	2764.73	0.335847
2515.45	0.104961	2763.56	0.180211	2763.56	0.168927	2763.56	0.214735
2514.02	0.100322	2762.39	0.188251	2762.39	0.266057	2762.39	0.20537
2512.59	0.113546	2761.22	0.159088	2761.22	0.287974	2761.22	0.289082
2511.15	0.108906	2760.04	0.270388	2760.04	0.218103	2760.04	0.242485
2509.72	0.117022	2758.87	0.199927	2758.87	0.275852	2758.87	0.242425
2508.29	0.0991234	2757.7	0.158399	2757.7	0.314357	2757.7	0.316786
2506.86	0.106218	2756.53	0.174688	2756.53	0.236657	2756.53	0.260906
2505.42	0.11127	2755.35	0.174458	2755.35	0.284757	2755.35	0.223645
2503.99	0.104597	2754.18	0.149459	2754.18	0.293548	2754.18	0.270077
2502.56	0.10608	2753.01	0.221446	2753.01	0.210652	2753.01	0.288605
2501.12	0.112148	2751.83	0.237706	2751.83	0.270956	2751.83	0.316424
2499.69	0.107516	2750.66	0.138457	2750.66	0.264032	2750.66	0.288469
2498.26	0.0983029	2749.49	0.24753	2749.49	0.285039	2749.49	0.399903
2496.82	0.108443	2748.31	0.195738	2748.31	0.264151	2748.31	0.306914
2495.39	0.103305	2747.14	0.207873	2747.14	0.288637	2747.14	0.306843
2493.95	0.106314	2745.96	0.203509	2745.96	0.270371	2745.96	0.260336
2492.52	0.114919	2744.79	0.23625	2744.79	0.244264	2744.79	0.315987
2491.08	0.103678	2743.61	0.192737	2743.61	0.286177	2743.61	0.325197
2489.64	0.124489	2742.44	0.188372	2742.44	0.246124	2742.44	0.436513
2488.21	0.107147	2741.26	0.184017	2741.26	0.210443	2741.26	0.334329
2486.77	0.123882	2740.09	0.220854	2740.09	0.356064	2740.09	0.352815
2485.34	0.112139	2738.91	0.243264	2738.91	0.221904	2738.91	0.389847
2483.9	0.0948101	2737.74	0.275966	2737.74	0.295156	2737.74	0.371209
2482.46	0.103914	2736.56	0.213958	2736.56	0.224642	2736.56	0.389677
2481.02	0.105901	2735.39	0.166388	2735.39	0.270867	2735.39	0.324678
2479.59	0.103823	2734.21	0.172326	2734.21	0.316206	2734.21	0.343146
2478.15	0.0946357	2733.03	0.246162	2733.03	0.276201	2733.03	0.426504
2476.71	0.101701	2731.86	0.206832	2731.86	0.237079	2731.86	0.389337
2475.27	0.108256	2730.68	0.194256	2730.68	0.268472	2730.68	0.305848
2473.83	0.0879061	2729.5	0.233088	2729.5	0.306815	2729.5	0.463292
2472.39	0.109178	2728.32	0.24929	2728.32	0.242473	2728.32	0.453929
2470.95	0.102535	2727.15	0.166822	2727.15	0.334751	2727.15	0.426046
2469.51	0.0943739	2725.97	0.242633	2725.97	0.308695	2725.97	0.34261
2468.07	0.112589	2724.79	0.269109	2724.79	0.314829	2724.79	0.509199
2466.63	0.112541	2723.61	0.203112	2723.61	0.294002	2723.61	0.509094
2465.19	0.103875	2722.43	0.266558	2722.43	0.331436	2722.43	0.342379
2463.75	0.114981	2721.26	0.221118	2721.26	0.237598	2721.26	0.397827
2462.31	0.105812	2720.08	0.253733	2720.08	0.290669	2720.08	0.471769
2460.87	0.0976589	2718.9	0.257599	2718.9	0.352416	2718.9	0.480918
2459.42	0.106226	2717.72	0.279931	2717.72	0.292499	2717.72	0.527069
2457.98	0.105674	2716.54	0.261206	2716.54	0.367257	2716.54	0.462223
2456.54	0.109173	2715.36	0.211708	2715.36	0.298672	2715.36	0.54535
2455.1	0.102038	2714.18	0.275077	2714.18	0.402927	2714.18	0.480521
2453.65	0.0989562	2713	0.225589	2713	0.311788	2713	0.526637
2452.21	0.0903085	2711.82	0.303289	2711.82	0.306619	2711.82	0.480321
2450.77	0.0983611	2710.64	0.28868	2710.64	0.340512	2710.64	0.452498
2449.32	0.0962933	2709.46	0.302781	2709.46	0.269388	2709.46	0.489361
2447.88	0.104847	2708.28	0.232823	2708.28	0.311956	2708.28	0.544682
2446.43	0.0876087	2707.1	0.296124	2707.1	0.350168	2707.1	0.544573
2444.99	0.0981834	2705.92	0.222089	2705.92	0.34066	2705.92	0.572164
2443.54	0.0920733	2704.73	0.299711	2704.73	0.374518	2704.73	0.48895
2442.1	0.0809121	2703.55	0.274877	2703.55	0.356339	2703.55	0.627325
2440.65	0.103608	2702.37	0.237754	2702.37	0.326894	2702.37	0.534901
2439.21	0.0985109	2701.19	0.298954	2701.19	0.378941	2701.19	0.590161
2437.76	0.08887	2700.01	0.255692	2700.01	0.407568	2700.01	0.525455
2436.31	0.0792332	2698.83	0.310724	2698.83	0.364268	2698.83	0.580698
2434.87	0.0832315	2697.64	0.249054	2697.64	0.373826	2697.64	0.635924
2433.42	0.0897519	2696.46	0.398225	2696.46	0.333144	2696.46	0.598909
2431.97	0.106868	2695.28	0.281304	2695.28	0.382544	2695.28	0.534242
2430.52	0.0972347	2694.09	0.303568	2694.09	0.385168	2694.09	0.524914
2429.08	0.0916414	2692.91	0.295127	2692.91	0.398182	2692.91	0.580114
2427.63	0.0815111	2691.73	0.333736	2691.73	0.356652	2691.73	0.616862
2426.18	0.0965977	2690.54	0.353927	2690.54	0.420729	2690.54	0.54302
2424.73	0.0925203	2689.36	0.271875	2689.36	0.449307	2689.36	0.515272
2423.28	0.0879406	2688.18	0.302292	2688.18	0.374047	2688.18	0.64413
2421.83	0.0873942	2686.99	0.318388	2686.99	0.32909	2686.99	0.487428
2420.38	0.0999482	2685.81	0.285429	2685.81	0.346423	2685.81	0.560995
2418.93	0.0787459	2684.62	0.371001	2684.62	0.454552	2684.62	0.53326
2417.48	0.0787053	2683.44	0.374819	2683.44	0.420841	2683.44	0.625209
2416.03	0.0816858	2682.25	0.292844	2682.25	0.437283	2682.25	0.514635
2414.58	0.0947345	2681.07	0.398789	2681.07	0.419149	2681.07	0.496123
2413.13	0.0730465	2679.88	0.376055	2679.88	0.476202	2679.88	0.523623
2411.68	0.0805557	2678.7	0.375797	2678.7	0.380301	2678.7	0.505119
2410.23	0.0966155	2677.51	0.377561	2677.51	0.407967	2677.51	0.505015
2408.77	0.0935532	2676.32	0.36913	2676.32	0.426987	2676.32	0.403752
2407.32	0.0849595	2675.14	0.372947	2675.14	0.410594	2675.14	0.642726
2405.87	0.0753633	2673.95	0.450211	2673.95	0.503007	2673.95	0.440348
2404.42	0.0647658	2672.76	0.43566	2672.76	0.395954	2672.76	0.587321
2402.96	0.0702571	2671.58	0.410902	2671.58	0.439133	2671.58	0.541253
2401.51	0.0656952	2670.39	0.398394	2670.39	0.458132	2670.39	0.430876
2400.05	0.0807307	2669.2	0.377733	2669.2	0.41413	2669.2	0.531842
2398.6	0.071145	2668.02	0.403967	2668.02	0.452108	2668.02	0.430693
2397.15	0.0620654	2666.83	0.348659	2666.83	0.403811	2666.83	0.448969
2395.69	0.0730752	2665.64	0.425836	2665.64	0.491799	2665.64	0.430509
2394.24	0.0725338	2664.45	0.392954	2664.45	0.478002	2664.45	0.384511
2392.78	0.0684788	2663.26	0.435475	2663.26	0.375408	2663.26	0.384428
2391.33	0.0739605	2662.08	0.43112	2662.08	0.498701	2662.08	0.4027
2389.87	0.0729171	2660.89	0.414545	2660.89	0.414236	2660.89	0.347553
2388.41	0.0768908	2659.7	0.338932	2659.7	0.490085	2659.7	0.384175
2386.96	0.0618042	2658.51	0.332563	2658.51	0.489222	2658.51	0.43913
2385.5	0.0582568	2657.32	0.427973	2657.32	0.451317	2657.32	0.402351
2384.04	0.056215	2656.13	0.327968	2656.13	0.439266	2656.13	0.448114
2382.59	0.0621937	2654.94	0.425392	2654.94	0.431522	2654.94	0.393006
2381.13	0.0746848	2653.75	0.396626	2653.75	0.413451	2653.75	0.438755
2379.67	0.0676303	2652.56	0.319057	2652.56	0.423796	2652.56	0.310344
2378.21	0.0655883	2651.37	0.298454	2651.37	0.422944	2651.37	0.365258
2376.75	0.0660508	2650.18	0.403944	2650.18	0.433281	2650.18	0.401828
2375.3	0.062007	2648.99	0.31828	2648.99	0.4548	2648.99	0.374254
2373.84	0.073985	2647.8	0.287529	2647.8	0.402327	2647.8	0.346693
2372.38	0.0739453	2646.61	0.338087	2646.61	0.379113	2646.61	0.429039
2370.92	0.051886	2645.42	0.268729	2645.42	0.459114	2645.42	0.245817
2369.46	0.0538521	2644.23	0.298962	2644.23	0.380009	2644.23	0.282376
2368	0.0618203	2643.03	0.310894	2643.03	0.439346	2643.03	0.328077
2366.54	0.0622831	2641.84	0.284229	2641.84	0.373161	2641.84	0.300545
2365.08	0.0647456	2640.65	0.288036	2640.65	0.293249	2640.65	0.227272
2363.62	0.0687073	2639.46	0.293878	2639.46	0.371475	2639.46	0.218065
2362.15	0.0521738	2638.27	0.261141	2638.27	0.325957	2638.27	0.30948
2360.69	0.056636	2637.07	0.266983	2637.07	0.407587	2637.07	0.291117
2359.23	0.0680917	2635.88	0.209903	2635.88	0.326863	2635.88	0.254472
2357.77	0.0660549	2634.69	0.268508	2634.69	0.292535	2634.69	0.336694
2356.31	0.0510334	2633.49	0.241881	2633.49	0.254784	2633.49	0.263488
2354.84	0.0569902	2632.3	0.233527	2632.3	0.370712	2632.3	0.336541
2353.38	0.0634439	2631.11	0.261678	2631.11	0.293479	2631.11	0.263359
2351.92	0.0574168	2629.91	0.174232	2629.91	0.323541	2629.91	0.226749
2350.45	0.0543859	2628.72	0.220626	2628.72	0.349302	2628.72	0.24496
2348.99	0.0483629	2627.53	0.248768	2627.53	0.275544	2627.53	0.2723
2347.52	0.0627944	2626.33	0.230275	2626.33	0.265282	2626.33	0.199178
2346.06	0.0662483	2625.14	0.252326	2625.14	0.294468	2625.14	0.235646
2344.59	0.0627193	2623.94	0.154819	2623.94	0.273916	2623.94	0.162556
2343.13	0.0522124	2622.75	0.229546	2622.75	0.275659	2622.75	0.244655
2341.66	0.0661335	2621.55	0.194873	2621.55	0.346831	2621.55	0.281097
2340.2	0.0536365	2620.36	0.146024	2620.36	0.311713	2620.36	0.244532
2338.73	0.0416429	2619.16	0.101252	2619.16	0.262894	2619.16	0.235348
2337.27	0.0570521	2617.96	0.129374	2617.96	0.284341	2617.96	0.217047
2335.8	0.0585098	2616.77	0.197962	2616.77	0.226119	2616.77	0.180511
2334.33	0.0614609	2615.57	0.149161	2615.57	0.23472	2615.57	0.162224
2332.86	0.0519643	2614.38	0.183325	2614.38	0.267291	2614.38	0.216877
2331.4	0.0574042	2613.18	0.172967	2613.18	0.267319	2613.18	0.225935
2329.93	0.0802594	2611.98	0.138352	2611.98	0.243378	2611.98	0.225877
2328.46	0.0682772	2610.79	0.214967	2610.79	0.2049	2610.79	0.207595
2326.99	0.0831619	2609.59	0.0913835	2609.59	0.179266	2609.59	0.271314
2325.52	0.0701893	2608.39	0.141709	2608.39	0.197272	2608.39	0.216595
2324.06	0.0711447	2607.19	0.232442	2607.19	0.217842	2607.19	0.24386
2322.59	0.0512195	2606	0.139225	2606	0.166562	2606	0.198269
2321.12	0.0462138	2604.8	0.19962	2604.8	0.214491	2604.8	0.170903
2319.65	0.0561183	2603.6	0.171096	2603.6	0.188021	2603.6	0.234574
2318.18	0.043661	2602.4	0.174904	2602.4	0.251321	2602.4	0.170805
2316.71	0.0515751	2601.2	0.0938779	2601.2	0.153908	2601.2	0.225355
2315.23	0.0465732	2600	0.0896195	2600	0.171045	2600	0.252592
2313.76	0.0435596	2598.8	0.0853611	2598.8	0.155706	2598.8	0.197949
2312.29	0.0519655	2597.6	0.147713	2597.6	0.186505	2597.6	0.1888
2310.82	0.0554045	2596.41	0.0849202	2596.41	0.183982	2596.41	0.197842
2309.35	0.0375033	2595.21	0.165418	2595.21	0.226718	2595.21	0.261434
2307.88	0.0414398	2594.01	0.189396	2594.01	0.254075	2594.01	0.188645
2306.4	0.0404146	2592.81	0.0499612	2592.81	0.110675	2592.81	0.161326
2304.93	0.0473247	2591.61	0.148576	2591.61	0.167062	2591.61	0.161278
2303.46	0.0591906	2590.41	0.0818036	2590.41	0.186731	2590.41	0.197575
2301.98	0.0427938	2589.2	0.131983	2589.2	0.0869315	2589.2	0.0885069
2300.51	0.0452385	2588	0.155951	2588	0.191067	2588	0.251967
2299.04	0.0437177	2586.8	0.145641	2586.8	0.174044	2586.8	0.170171
2297.56	0.0491339	2585.6	0.101072	2585.6	0.221841	2585.6	0.197362
2296.09	0.0446407	2584.4	0.112946	2584.4	0.226987	2584.4	0.160995
2294.61	0.0559976	2583.2	0.0966027	2583.2	0.112773	2583.2	0.179101
2293.14	0.051505	2582	0.0742176	2582	0.199767	2582	0.197202
2291.66	0.0475091	2580.79	0.0921237	2580.79	0.14525	2580.79	0.151779
2290.19	0.0415348	2579.59	0.136507	2579.59	0.145294	2579.59	0.160806
2288.71	0.0449656	2578.39	0.142943	2578.39	0.149596	2578.39	0.151688
2287.23	0.0345417	2577.19	0.0608068	2577.19	0.22119	2577.19	0.206058
2285.76	0.0354989	2575.98	0.0994533	2575.98	0.142859	2575.98	0.151596
2284.28	0.0414013	2574.78	0.0857769	2574.78	0.157377	2574.78	0.133418
2282.8	0.052246	2573.58	0.138488	2573.58	0.145497	2573.58	0.115246
2281.33	0.0477612	2572.37	0.128825	2572.37	0.103822	2572.37	0.0970796
2279.85	0.0487152	2571.17	0.109107	2571.17	0.123446	2571.17	0.196723
2278.37	0.0402796	2569.97	0.13364	2569.97	0.129449	2569.97	0.196669
2276.89	0.0407404	2568.76	0.0857873	2568.76	0.179687	2568.76	0.0788526
2275.41	0.0377434	2567.56	0.0640836	2567.56	0.0903959	2567.56	0.160334
2273.93	0.0357352	2566.35	0.0745426	2566.35	0.14658	2566.35	0.169342
2272.45	0.0539722	2565.15	0.109107	2565.15	0.115156	2565.15	0.105915
2270.97	0.0494933	2563.94	0.109515	2563.94	0.0820338	2563.94	0.160193
2269.49	0.0489647	2562.74	0.0757659	2562.74	0.0778326	2562.74	0.142043
2268.01	0.0563319	2561.53	0.12639	2561.53	0.100831	2561.53	0.160098
2266.53	0.0375474	2560.33	0.0886322	2560.33	0.0957779	2560.33	0.250532
2265.05	0.0518197	2559.12	0.066953	2559.12	0.1621	2559.12	0.178097
2263.57	0.0493183	2557.92	0.0613329	2557.92	0.0834434	2557.92	0.123777
2262.09	0.0497764	2556.71	0.123974	2556.71	0.164315	2556.71	0.132779
2260.61	0.035938	2555.5	0.120364	2555.5	0.124563	2555.5	0.150821
2259.13	0.0442845	2554.3	0.104712	2554.3	0.0635907	2554.3	0.114613
2257.64	0.0383371	2553.09	0.0850564	2553.09	0.136782	2553.09	0.132652
2256.16	0.0417531	2551.88	0.135613	2551.88	0.111489	2551.88	0.141647
2254.68	0.0289128	2550.68	0.0678179	2550.68	0.0768575	2550.68	0.141603
2253.19	0.0451333	2549.47	0.148441	2549.47	0.161044	2549.47	0.12349
2251.71	0.0362366	2548.26	0.100724	2548.26	0.177328	2548.26	0.150547
2250.23	0.0352195	2547.06	0.141214	2547.06	0.133374	2547.06	0.123408
2248.74	0.050937	2545.85	0.0654551	2545.85	0.075022	2545.85	0.168516
2247.26	0.0346632	2544.64	0.10996	2544.64	0.0964035	2544.64	0.114297
2245.77	0.0356149	2543.43	0.078307	2543.43	0.0880997	2543.43	0.141338
2244.29	0.0439447	2542.22	0.122783	2542.22	0.119644	2542.22	0.16837
2242.8	0.0527628	2541.01	0.0611026	2541.01	0.207965	2541.01	0.168322
2241.32	0.0487935	2539.8	0.149627	2539.8	0.1827	2539.8	0.105117
2239.83	0.048267	2538.6	0.099968	2538.6	0.117613	2538.6	0.222349
2238.35	0.0339792	2537.39	0.0643451	2537.39	0.163533	2537.39	0.141118
2236.86	0.0398436	2536.18	0.144823	2536.18	0.142522	2536.18	0.15911
2235.37	0.0437408	2534.97	0.0591768	2534.97	0.135919	2534.97	0.122998
2233.89	0.0525484	2533.76	0.179636	2533.76	0.173344	2533.76	0.140986
2232.4	0.0417087	2532.55	0.0840067	2532.55	0.110013	2532.55	0.195021
2230.91	0.045112	2531.34	0.0904181	2531.34	0.049247	2531.34	0.176945
2229.42	0.0337873	2530.13	0.0908357	2530.13	0.136601	2530.13	0.0507533
2227.93	0.0435713	2528.92	0.0812507	2528.92	0.124076	2528.92	0.0957672
2226.45	0.0376491	2527.7	0.0516751	2527.7	0.100567	2527.7	0.095731
2224.96	0.0425221	2526.49	0.0800769	2526.49	0.114277	2526.49	0.140723
2223.47	0.0410171	2525.28	0.0684971	2525.28	0.145744	2525.28	0.149682
2221.98	0.041474	2524.07	0.0868962	2524.07	0.1197	2524.07	0.12263
2220.49	0.0443824	2522.86	0.0953024	2522.86	0.191736	2522.86	0.122589
2219	0.0492502	2521.65	0.119676	2521.65	0.0921552	2521.65	0.122548
2217.51	0.0462746	2520.43	0.0382087	2520.43	0.105019	2520.43	0.149501
2216.02	0.0428099	2519.22	0.0326421	2519.22	0.151669	2519.22	0.131462
2214.53	0.0432663	2518.01	0.0729928	2518.01	0.131563	2518.01	0.11343
2213.03	0.0368648	2516.8	0.0893778	2516.8	0.113993	2516.8	0.167351
2211.54	0.0402603	2515.58	0.0558612	2515.58	0.142893	2515.58	0.167303
2210.05	0.0495295	2514.37	0.0762357	2514.37	0.107596	2514.37	0.167254
2208.56	0.039704	2513.16	0.0606859	2513.16	0.155052	2513.16	0.122261
2207.07	0.0303722	2511.94	0.101003	2511.94	0.127371	2511.94	0.140195
2205.57	0.041595	2510.73	0.117369	2510.73	0.122481	2510.73	0.212038
2204.08	0.0391155	2509.52	0.107803	2509.52	0.120123	2509.52	0.131123
2202.59	0.0542448	2508.3	0.098252	2508.3	0.187801	2508.3	0.122098
2201.09	0.0458954	2507.09	0.0687682	2507.09	0.103608	2507.09	0.0771502
2199.6	0.0375494	2505.87	0.0711758	2505.87	0.190665	2505.87	0.193855
2198.1	0.0458267	2504.66	0.0875318	2504.66	0.13939	2504.66	0.0860619
2196.61	0.0277095	2503.44	0.0580724	2503.44	0.151369	2503.44	0.139888
2195.11	0.0438033	2502.23	0.0903571	2502.23	0.176832	2502.23	0.121894
2193.62	0.024717	2501.01	0.0867903	2501.01	0.135702	2501.01	0.166722
2192.12	0.0368973	2499.8	0.0991569	2499.8	0.196551	2499.8	0.094895
2190.63	0.0471196	2498.58	0.0736869	2498.58	0.127628	2498.58	0.157654
2189.13	0.0397615	2497.36	0.0522161	2497.36	0.150557	2497.36	0.139669
2187.64	0.0543719	2496.15	0.048654	2496.15	0.162517	2496.15	0.139625
2186.14	0.0284704	2494.93	0.118727	2494.93	0.0725803	2494.93	0.139581
2184.64	0.0445411	2493.71	0.109196	2493.71	0.167919	2493.71	0.103678
2183.14	0.0357259	2492.5	0.0757804	2492.5	0.121783	2492.5	0.139494
2181.65	0.0405709	2491.28	0.0980869	2491.28	0.116916	2491.28	0.121526
2180.15	0.0561417	2490.06	0.106459	2490.06	0.145712	2490.06	0.130446
2178.65	0.0361163	2488.85	0.0651138	2488.85	0.134946	2488.85	0.0945687
2177.15	0.0360838	2487.63	0.0655364	2487.63	0.215053	2487.63	0.184104
2175.65	0.0306904	2486.41	0.0838438	2486.41	0.168111	2486.41	0.193008
2174.15	0.0520975	2485.19	0.0822814	2485.19	0.216226	2485.19	0.139231
2172.65	0.0447547	2483.97	0.0528994	2483.97	0.140714	2483.97	0.103376
2171.15	0.0442334	2482.75	0.108952	2482.75	0.132486	2482.75	0.157045
2169.65	0.0373823	2481.54	0.127234	2481.54	0.120051	2481.54	0.148049
2168.15	0.0305335	2480.32	0.0581421	2480.32	0.121916	2480.32	0.112211
2166.65	0.0480251	2479.1	0.0466546	2479.1	0.138903	2479.1	0.165851
2165.15	0.0416637	2477.88	0.0967128	2477.88	0.104637	2477.88	0.138968
2163.65	0.0289797	2476.66	0.073315	2476.66	0.0703827	2476.66	0.165755
2162.15	0.0435421	2475.44	0.125329	2475.44	0.122648	2475.44	0.192533
2160.65	0.0396175	2474.22	0.0900309	2474.22	0.221081	2474.22	0.165658
2159.15	0.0439605	2473	0.096399	2473	0.113777	2473	0.201366
2157.64	0.0239938	2471.78	0.0968216	2471.78	0.135788	2471.78	0.138749
2156.14	0.0434062	2470.56	0.138891	2470.56	0.137649	2470.56	0.183385
2154.64	0.0399705	2469.34	0.0817964	2469.34	0.147899	2469.34	0.129727
2153.13	0.0326492	2468.12	0.123856	2468.12	0.119554	2468.12	0.102886
2151.63	0.0321315	2466.89	0.0786766	2466.89	0.159171	2466.89	0.0671221
2150.13	0.0393849	2465.67	0.0989206	2465.67	0.147608	2465.67	0.16532
2148.62	0.0398372	2464.45	0.135006	2464.45	0.113403	2464.45	0.129558
2147.12	0.0461151	2463.23	0.105702	2463.23	0.142097	2463.23	0.254493
2145.61	0.0436534	2462.01	0.11603	2462.01	0.188384	2462.01	0.111623
2144.11	0.0494428	2460.79	0.0986165	2460.79	0.159219	2460.79	0.111584
2142.6	0.0363076	2459.56	0.15449	2459.56	0.111637	2459.56	0.111544
2141.09	0.0450065	2458.34	0.0796649	2458.34	0.110146	2458.34	0.200714
2139.59	0.0362425	2457.12	0.0325726	2457.12	0.126251	2457.12	0.129305
2138.08	0.028452	2455.89	0.0884361	2455.89	0.134819	2455.89	0.156016
2136.58	0.0308447	2454.67	0.0829133	2454.67	0.118251	2454.67	0.111388
2135.07	0.0448692	2453.45	0.0892717	2453.45	0.124296	2453.45	0.0846038
2133.56	0.0273896	2452.22	0.178726	2452.22	0.197324	2452.22	0.120223
2132.05	0.0472227	2451	0.0426555	2451	0.140577	2451	0.164742
2130.55	0.0302343	2449.78	0.0885694	2449.78	0.171726	2449.78	0.155783
2129.04	0.0316558	2448.55	0.146331	2448.55	0.137601	2448.55	0.12901
2127.53	0.0422764	2447.33	0.121045	2447.33	0.146986	2447.33	0.0933379
2126.02	0.0456312	2446.1	0.0621731	2446.1	0.17896	2446.1	0.0665841
2124.51	0.0354328	2444.88	0.0606204	2444.88	0.11641	2444.88	0.10217
2123	0.0334647	2443.65	0.0748853	2443.65	0.0772979	2443.65	0.137744
2121.49	0.0368193	2442.43	0.0753079	2442.43	0.117622	2442.43	0.173306
2119.98	0.0275962	2441.2	0.0875974	2441.2	0.15376	2441.2	0.146557
2118.47	0.0338521	2439.98	0.0643159	2439.98	0.118838	2439.98	0.146511
2116.96	0.0478419	2438.75	0.0983149	2438.75	0.149949	2438.75	0.128673
2115.45	0.0352382	2437.52	0.126388	2437.52	0.0949938	2437.52	0.12863
2113.94	0.0376225	2436.3	0.0853475	2436.3	0.0801476	2436.3	0.137482
2112.43	0.0332406	2435.07	0.101568	2435.07	0.0870307	2435.07	0.164116
2110.91	0.0452864	2433.84	0.0980453	2433.84	0.128984	2433.84	0.110722
2109.4	0.0491161	2432.62	0.0767681	2432.62	0.0999424	2432.62	0.15513
2107.89	0.0312128	2431.39	0.128478	2431.39	0.0750952	2431.39	0.181747
2106.38	0.0461487	2430.16	0.0855153	2430.16	0.119536	2430.16	0.163923
2104.86	0.0272876	2428.93	0.0622775	2428.93	0.101368	2428.93	0.110566
2103.35	0.0369095	2427.71	0.0528524	2427.71	0.159129	2427.71	0.0749941
2101.84	0.0325338	2426.48	0.0769456	2426.48	0.0934134	2426.48	0.163779
2100.32	0.041668	2425.25	0.0852554	2425.25	0.0936087	2425.25	0.12821
2098.81	0.0276467	2424.02	0.101447	2424.02	0.0496077	2424.02	0.128167
2097.29	0.0343672	2422.79	0.0289805	2422.79	0.184891	2422.79	0.137003
2095.78	0.0314419	2421.56	0.120032	2421.56	0.123384	2421.56	0.048201
2094.26	0.0555123	2420.34	0.0672754	2420.34	0.0293821	2420.34	0.110293
2092.75	0.0280049	2419.11	0.0775508	2419.11	0.0637583	2419.11	0.145745
2091.23	0.0438749	2417.88	0.0484548	2417.88	0.0539628	2417.88	0.0924719
2089.71	0.0308336	2416.65	0.0902293	2416.65	0.0525025	2416.65	0.119045
2088.2	0.0423614	2415.42	0.0945883	2415.42	0.0493784	2415.42	0.181083
2086.68	0.0331781	2414.19	0.0595953	2414.19	0.119542	2414.19	0.101231
2085.16	0.0283316	2412.96	0.113154	2412.96	0.0464578	2412.96	0.136654
2083.65	0.0369648	2411.73	0.0604701	2411.73	0.0608196	2411.73	0.145475
2082.13	0.0455947	2410.5	0.0609075	2410.5	0.0984823	2410.5	0.109981
2080.61	0.0368993	2409.26	0.0888789	2409.26	0.0953562	2409.26	0.0833591
2079.09	0.0363854	2408.03	0.0775126	2408.03	0.0622721	2408.03	0.127621
2077.57	0.0382764	2406.8	0.097597	2406.8	0.0275325	2406.8	0.136437
2076.05	0.046899	2405.57	0.0842651	2405.57	0.0410502	2405.57	0.189531
2074.53	0.034845	2404.34	0.0709428	2404.34	0.136076	2404.34	0.109785
2073.01	0.0492327	2403.11	0.0222578	2403.11	0.0497841	2403.11	0.171719
2071.49	0.0429499	2401.87	0.0698472	2401.87	0.080761	2401.87	0.0920037
2069.97	0.046279	2400.64	0.0761816	2400.64	0.108392	2400.64	0.136219
2068.45	0.0438425	2399.41	0.0393004	2399.41	0.0487491	2399.41	0.0919318
2066.93	0.045249	2398.18	0.104537	2398.18	0.0564354	2398.18	0.100743
2065.41	0.0408929	2396.94	0.0421459	2396.94	0.0840684	2396.94	0.0387854
2063.89	0.0355783	2395.71	0.0700639	2395.71	0.101713	2395.71	0.162578
2062.37	0.0379456	2394.48	0.0960162	2394.48	0.0520771	2394.48	0.118316
2060.85	0.0436713	2393.24	0.0591691	2393.24	0.100458	2393.24	0.135958
2059.32	0.0278039	2392.01	0.0851021	2392.01	0.0715947	2392.01	0.0475169
2057.8	0.0335293	2390.77	0.120849	2390.77	0.0875772	2390.77	0.0651653
2056.28	0.0445276	2389.54	0.0271377	2389.54	0.131772	2389.54	0.0562968
2054.75	0.0526448	2388.31	0.0785663	2388.31	0.0722153	2388.31	0.135785
2053.23	0.0449385	2387.07	0.108416	2387.07	0.0126853	2387.07	0.10924
2051.71	0.0492175	2385.84	0.118643	2385.84	0.108301	2385.84	0.14453
2050.18	0.0395979	2384.6	0.0779132	2384.6	0.110994	2384.6	0.0561773
2048.66	0.0438767	2383.37	0.060708	2383.37	0.136072	2383.37	0.14444
2047.13	0.0347409	2382.13	0.0748714	2382.13	0.124664	2382.13	0.100256
2045.61	0.0313563	2380.89	0.114492	2380.89	0.0892172	2380.89	0.109045
2044.08	0.0327608	2379.66	0.0874968	2379.66	0.0902485	2379.66	0.0913567
2042.56	0.0341651	2378.42	0.0938072	2378.42	0.130237	2378.42	0.038381
2041.03	0.0480128	2377.19	0.0668317	2377.19	0.063316	2377.19	0.0648193
2039.5	0.0321864	2375.95	0.0927214	2375.95	0.138088	2375.95	0.12653
2037.98	0.0412444	2374.71	0.0422694	2374.71	0.0993586	2374.71	0.0912132
2036.45	0.0426457	2373.48	0.0818459	2373.48	0.101218	2373.48	0.0294558
2034.92	0.0378293	2372.24	0.0666308	2372.24	0.166838	2372.24	0.144036
2033.39	0.0263211	2371	0.0827211	2371	0.0627188	2371	0.0558479
2031.87	0.0454118	2369.76	0.108591	2369.76	0.0670714	2369.76	0.126321
2030.34	0.0429875	2368.53	0.101195	2368.53	0.118589	2368.53	0.117467
2028.81	0.0362635	2367.29	0.0938136	2367.29	0.0699719	2367.29	0.117427
2027.28	0.0362308	2366.05	0.0551557	2366.05	0.0610841	2366.05	0.15262
2025.75	0.0438404	2364.81	0.0731924	2364.81	0.13161	2364.81	0.117347
2024.22	0.0251813	2363.57	0.12053	2363.57	0.0706089	2363.57	0.0732794
2022.69	0.0347	2362.33	0.0642973	2362.33	0.112167	2362.33	0.0556385
2021.16	0.0442147	2361.09	0.0706077	2361.09	0.0371382	2361.09	0.143633
2019.63	0.058021	2359.85	0.117926	2359.85	0.0993537	2359.85	0.152389
2018.1	0.0322168	2358.61	0.0636783	2358.61	0.100387	2358.61	0.117145
2016.57	0.0374325	2357.38	0.0777883	2357.38	0.0981112	2357.38	0.0907106
2015.04	0.0440771	2356.14	0.109459	2356.14	0.117323	2356.14	0.12586
2013.51	0.0311672	2354.89	0.121613	2354.89	0.0687938	2354.89	0.108229
2011.97	0.0397174	2353.65	0.108383	2353.65	0.127649	2353.65	0.143364
2010.44	0.0210933	2352.41	0.0854117	2352.41	0.0568372	2352.41	0.0729836
2008.91	0.029642	2351.17	0.136574	2351.17	0.0793437	2351.17	0.108112
2007.38	0.0243693	2349.93	0.0882428	2349.93	0.131564	2349.93	0.0904955
2005.84	0.0405361	2348.69	0.0984265	2348.69	0.0847214	2348.69	0.0904597
2004.31	0.0309765	2347.45	0.122263	2347.45	0.124546	2347.45	0.0816379
2002.77	0.0342781	2346.21	0.0661661	2346.21	0.167652	2346.21	0.13431
2001.24	0.0375783	2344.97	0.0919492	2344.97	0.148053	2344.97	0.0640035
1999.71	0.0432572	2343.72	0.0826458	2343.72	0.140011	2343.72	0.0815349
1998.17	0.0327532	2342.48	0.13375	2342.48	0.150109	2342.48	0.151741
1996.64	0.0274872	2341.24	0.103013	2341.24	0.137119	2341.24	0.0902451
1995.1	0.0403003	2340	0.0898121	2340	0.104345	2340	0.0989861
1993.56	0.0240958	2338.75	0.0493582	2338.75	0.162259	2338.75	0.151602
1992.03	0.032625	2337.51	0.0653904	2337.51	0.135263	2337.51	0.0989115
1990.49	0.0240353	2336.27	0.0677791	2336.27	0.123928	2336.27	0.0813294
1988.95	0.043493	2335.02	0.105216	2335.02	0.126611	2335.02	0.107608
1987.42	0.0396569	2333.78	0.0900784	2333.78	0.132582	2333.78	0.0987999
1985.88	0.0329715	2332.54	0.0885745	2332.54	0.0792566	2332.54	0.0899946
1984.34	0.0315144	2331.29	0.125992	2331.29	0.10006	2331.29	0.116258
1982.8	0.0362317	2330.05	0.103079	2330.05	0.118383	2330.05	0.081158
1981.27	0.039048	2328.8	0.12297	2328.8	0.163869	2328.8	0.133705
1979.73	0.0375903	2327.56	0.0806229	2327.56	0.135266	2327.56	0.133662
1978.19	0.0294884	2326.31	0.104407	2326.31	0.133006	2326.31	0.177422
1976.65	0.0237621	2325.07	0.0815225	2325.07	0.124163	2325.07	0.0372252
1975.11	0.032272	2323.82	0.0605897	2323.82	0.167969	2323.82	0.0722289
1973.57	0.0303424	2322.58	0.109612	2322.58	0.175571	2322.58	0.159758
1972.03	0.0402702	2321.33	0.109942	2321.33	0.0919023	2321.33	0.168465
1970.49	0.0497198	2320.08	0.0946697	2320.08	0.143092	2320.08	0.0721307
1968.95	0.0278773	2318.84	0.0735647	2318.84	0.125214	2318.84	0.159614
1967.41	0.0401691	2317.59	0.106853	2317.59	0.150906	2317.59	0.159567
1965.87	0.0377662	2316.34	0.0838154	2316.34	0.18234	2316.34	0.159519
1964.32	0.0292049	2315.1	0.115144	2315.1	0.104484	2315.1	0.098241
1962.78	0.025858	2313.85	0.0998819	2313.85	0.156453	2313.85	0.133187
1961.24	0.0390872	2312.6	0.0690975	2312.6	0.173089	2312.6	0.0719339
1959.7	0.035266	2311.36	0.0965339	2311.36	0.0599659	2311.36	0.0719012
1958.15	0.0319196	2310.11	0.110379	2310.11	0.161175	2310.11	0.0980922
1956.61	0.0266813	2308.86	0.104829	2308.86	0.0883248	2308.86	0.0893153
1955.07	0.038007	2307.61	0.0953953	2307.61	0.153382	2307.61	0.063065
1953.52	0.0417586	2306.36	0.140265	2306.36	0.114205	2306.36	0.080507
1951.98	0.0246965	2305.11	0.117256	2305.11	0.113597	2305.11	0.0717376
1950.43	0.0383801	2303.87	0.072931	2303.87	0.119552	2303.87	0.0979063
1948.89	0.025581	2302.62	0.125537	2302.62	0.155034	2302.62	0.106602
1947.34	0.0227141	2301.37	0.100611	2301.37	0.095379	2301.37	0.0978322
1945.8	0.0259924	2300.12	0.114437	2300.12	0.114458	2300.12	0.115254
1944.25	0.0278515	2298.87	0.0546515	2298.87	0.135167	2298.87	0.0541184
1942.71	0.0178995	2297.62	0.113029	2297.62	0.138657	2297.62	0.0540887
1941.16	0.0325125	2296.37	0.0881222	2296.37	0.0905214	2296.37	0.0889584
1939.61	0.0192578	2295.12	0.119368	2295.12	0.125156	2295.12	0.0976463
1938.06	0.0267824	2293.87	0.0964072	2293.87	0.164691	2293.87	0.106331
1936.52	0.0366641	2292.62	0.116033	2292.62	0.195207	2292.62	0.115013
1934.97	0.038047	2291.37	0.139522	2291.37	0.15446	2291.37	0.123692
1933.42	0.0299924	2290.11	0.126239	2290.11	0.132569	2290.11	0.0887804
1931.87	0.0327912	2288.86	0.0916877	2288.86	0.113135	2288.86	0.106177
1930.32	0.0360605	2287.61	0.101621	2287.61	0.180471	2287.61	0.0887089
1928.78	0.0393285	2286.36	0.1193	2286.36	0.0922946	2286.36	0.0625345
1927.23	0.028923	2285.11	0.121496	2285.11	0.120335	2285.11	0.0799263
1925.68	0.0449174	2283.86	0.141093	2283.86	0.157367	2283.86	0.0711818
1924.13	0.0326299	2282.6	0.091101	2282.6	0.116683	2282.6	0.114692
1922.58	0.0321268	2281.35	0.0565885	2281.35	0.0948194	2281.35	0.0711167
1921.03	0.0405738	2280.1	0.0935761	2280.1	0.13347	2280.1	0.0972008
1919.47	0.0395979	2278.84	0.0803314	2278.84	0.118976	2278.84	0.105868
1917.92	0.0339138	2277.59	0.0303841	2277.59	0.105296	2277.59	0.0362082
1916.37	0.0470632	2276.34	0.136877	2276.34	0.107151	2276.34	0.123193
1914.82	0.0324368	2275.08	0.0676349	2275.08	0.108192	2275.08	0.123151
1913.27	0.035228	2273.83	0.112311	2273.83	0.10106	2273.83	0.105713
1911.71	0.0300201	2272.58	0.0392306	2272.58	0.0947479	2272.58	0.131765
1910.16	0.0346922	2271.32	0.0993353	2271.32	0.158676	2271.32	0.00998888
1908.61	0.0393624	2270.07	0.109259	2270.07	0.0600827	2270.07	0.131679
1907.06	0.0327462	2268.81	0.0805887	2268.81	0.140329	2268.81	0.105559
1905.5	0.0388251	2267.56	0.0866485	2267.56	0.0915622	2267.56	0.0881391
1903.95	0.0340917	2266.3	0.088858	2266.3	0.0958739	2266.3	0.105482
1902.39	0.034059	2265.05	0.110333	2265.05	0.0406077	2265.05	0.140195
1900.84	0.0396642	2263.79	0.0855462	2263.79	0.0857184	2263.79	0.114091
1899.28	0.0344637	2262.53	0.0588323	2262.53	0.124289	2262.53	0.0879968
1897.73	0.0344312	2261.28	0.088025	2261.28	0.0274491	2261.28	0.0705945
1896.17	0.0320508	2260.02	0.113348	2260.02	0.116572	2260.02	0.079244
1894.62	0.0287328	2258.76	0.0982054	2258.76	0.116798	2258.76	0.0878904
1893.06	0.0385572	2257.51	0.0849958	2257.51	0.0852257	2257.51	0.113891
1891.5	0.0389931	2256.25	0.0274897	2256.25	0.107462	2256.25	0.0878193
1889.95	0.0267617	2254.99	0.0874685	2254.99	0.112577	2254.99	0.122487
1888.39	0.0323594	2253.74	0.0530917	2253.74	0.0484302	2253.74	0.0617247
1886.83	0.0252929	2252.48	0.0706973	2252.48	0.0975486	2252.48	0.131078
1885.27	0.0219801	2251.22	0.0863663	2251.22	0.141758	2251.22	0.052991
1883.71	0.0200751	2249.96	0.090493	2249.96	0.0442562	2249.96	0.0963112
1882.16	0.0331678	2248.7	0.11386	2248.7	0.0632221	2248.7	0.130948
1880.6	0.0284496	2247.45	0.112202	2247.45	0.0903162	2247.45	0.113571
1879.04	0.0204543	2246.19	0.0624718	2246.19	0.062873	2246.19	0.139528
1877.48	0.018551	2244.93	0.0742869	2244.93	0.146926	2244.93	0.0528431
1875.92	0.0208631	2243.67	0.105333	2243.67	0.099145	2243.67	0.0961263
1874.36	0.033006	2242.41	0.10945	2242.41	0.0798485	2242.41	0.165379
1872.8	0.0353139	2241.15	0.125099	2241.15	0.107736	2241.15	0.0787331
1871.24	0.0366848	2239.89	0.0888573	2239.89	0.142122	2239.89	0.104674
1869.68	0.0305691	2238.63	0.108341	2238.63	0.0813584	2238.63	0.104635
1868.11	0.0310051	2237.37	0.0951742	2237.37	0.0718395	2237.37	0.121907
1866.55	0.031441	2236.11	0.0858415	2236.11	0.0818268	2236.11	0.0699431
1864.99	0.02533	2234.85	0.0419594	2234.85	0.0674314	2234.85	0.173738
1863.43	0.0295068	2233.59	0.0537552	2233.59	0.0237891	2233.59	0.0958305
1861.86	0.0252683	2232.33	0.0962754	2232.33	0.0630274	2232.33	0.0611964
1860.3	0.0387897	2231.07	0.0984655	2231.07	0.139614	2231.07	0.1217
1858.74	0.0345513	2229.81	0.0910694	2229.81	0.11304	2229.81	0.104366
1857.17	0.0401239	2228.54	0.0759982	2228.54	0.0848528	2228.54	0.095683
1855.61	0.0335518	2227.28	0.0801153	2227.28	0.0631672	2227.28	0.0870025
1854.05	0.0456593	2226.02	0.0631329	2226.02	0.00982912	2226.02	0.112893
1852.48	0.0283515	2224.76	0.119025	2224.76	0.0790602	2224.76	0.0869314
1850.92	0.0446559	2223.49	0.125054	2223.49	0.094717	2223.49	0.121452
1849.35	0.0324885	2222.23	0.0639842	2222.23	0.0641184	2222.23	0.121411
1847.78	0.036655	2220.97	0.0815124	2220.97	0.0546241	2220.97	0.0954614
1846.22	0.0328903	2219.71	0.0817949	2219.71	0.124609	2219.71	0.0436173
1844.65	0.0244634	2218.44	0.0744121	2218.44	0.130517	2218.44	0.112653
1843.09	0.0295617	2217.18	0.111093	2217.18	0.0699379	2217.18	0.043561
1841.52	0.023936	2215.91	0.0902995	2215.91	0.0985523	2215.91	0.0694235
1839.95	0.0271678	2214.65	0.107808	2214.65	0.0631222	2214.65	0.0866483
1838.38	0.0290004	2213.39	0.0755363	2213.39	0.039863	2213.39	0.0866125
1836.82	0.0350252	2212.12	0.0873066	2212.12	0.0700879	2212.12	0.12108
1835.25	0.0256768	2210.86	0.0301588	2210.86	0.0816652	2210.86	0.0865418
1833.68	0.0354252	2209.59	0.116576	2209.59	0.0567975	2209.59	0.112375
1832.11	0.0325989	2208.33	0.111107	2208.33	0.0732309	2208.33	0.14682
1830.54	0.0381525	2207.06	0.0635586	2207.06	0.0686193	2207.06	0.129534
1828.97	0.0320686	2205.8	0.096357	2205.8	0.0550926	2205.8	0.077782
1827.4	0.0371547	2204.53	0.0698597	2204.53	0.133038	2204.53	0.138066
1825.83	0.0282825	2203.26	0.0491142	2203.26	0.105757	2203.26	0.0346371
1824.26	0.0287161	2202	0.0799857	2202	0.0809074	2202	0.12075
1822.69	0.0231044	2200.73	0.0554251	2200.73	0.0771031	2200.73	0.137933
1821.12	0.0346971	2199.46	0.141717	2199.46	0.0579357	2199.46	0.0862233
1819.55	0.0253677	2198.2	0.0999454	2198.2	0.0605999	2198.2	0.086188
1817.98	0.0411377	2196.93	0.0811268	2196.93	0.0293149	2196.93	0.0517206
1816.4	0.0304169	2195.66	0.110056	2195.66	0.119296	2195.66	0.0861173
1814.83	0.0322431	2194.4	0.0339386	2194.4	0.0589053	2194.4	0.120502
1813.26	0.0363909	2193.13	0.0896121	2193.13	0.160164	2193.13	0.154875
1811.69	0.0293925	2191.86	0.0650708	2191.86	0.0593983	2191.86	0.0860113
1810.11	0.0400385	2190.59	0.120715	2190.59	0.0951882	2190.59	0.0601737
1808.54	0.0492876	2189.32	0.0561053	2189.32	0.0889702	2189.32	0.111738
1806.96	0.0265131	2188.05	0.0544839	2188.05	0.0940544	2188.05	0.120296
1805.39	0.0399369	2186.79	0.0681195	2186.79	0.057149	2186.79	0.0686774
1803.82	0.0269145	2185.52	0.0664981	2185.52	0.00976729	2185.52	0.137403
1802.24	0.0287383	2184.25	0.122094	2184.25	0.0745911	2184.25	0.0943924
1800.66	0.0249972	2182.98	0.063265	2182.98	0.139394	2182.98	0.077172
1799.09	0.0291386	2181.71	0.0387625	2181.71	0.12914	2181.71	0.12009
1797.51	0.0314244	2180.44	0.0752732	2180.44	0.0366031	2180.44	0.154404
1795.94	0.0276853	2179.17	0.113682	2179.17	0.0876701	2179.17	0.120007
1794.36	0.0197776	2177.9	0.0682249	2177.9	0.0750061	2177.9	0.0426928
1792.78	0.0294752	2176.63	0.0399363	2176.63	0.0639648	2176.63	0.0512494
1791.21	0.0294434	2175.36	0.101178	2175.36	0.106938	2175.36	0.068386
1789.63	0.0340418	2174.09	0.114797	2174.09	0.0781613	2174.09	0.0940979
1788.05	0.0307687	2172.81	0.107467	2172.81	0.127571	2172.81	0.068321
1786.47	0.0302737	2171.54	0.128688	2171.54	0.14231	2171.54	0.0940246
1784.89	0.0330179	2170.27	0.0547239	2170.27	0.0917888	2170.27	0.0511023
1783.31	0.0246583	2169	0.0702416	2169	0.0743289	2169	0.128253
1781.74	0.0338781	2167.73	0.0914626	2167.73	0.152945	2167.73	0.111062
1780.16	0.0227468	2166.45	0.0708176	2166.45	0.119622	2166.45	0.10245
1778.58	0.0315009	2165.18	0.0654004	2165.18	0.0758331	2165.18	0.0509845
1777	0.0351667	2163.91	0.115138	2163.91	0.101287	2163.91	0.119513
1775.41	0.020807	2162.64	0.0963971	2162.64	0.110632	2162.64	0.0252211
1773.83	0.02817	2161.36	0.0605593	2161.36	0.0877993	2161.36	0.0937306
1772.25	0.0392254	2160.09	0.0760576	2160.09	0.105188	2160.09	0.145086
1770.67	0.0318019	2158.82	0.0345322	2158.82	0.0944245	2158.82	0.14504
1769.09	0.028999	2157.54	0.103243	2157.54	0.0868857	2157.54	0.144994
1767.51	0.0326606	2156.27	0.107325	2156.27	0.09462	2156.27	0.0679008
1765.92	0.0344745	2154.99	0.107605	2154.99	0.0854748	2154.99	0.110666
1764.34	0.0339801	2153.72	0.161071	2153.72	0.132594	2153.72	0.153416
1762.76	0.0371772	2152.44	0.129067	2152.44	0.0824616	2152.44	0.110586
1761.17	0.0283789	2151.17	0.0837752	2151.17	0.125549	2151.17	0.0592165
1759.59	0.0265025	2149.89	0.0365984	2149.89	0.077842	2149.89	0.0677394
1758.01	0.0352324	2148.62	0.120411	2148.62	0.088785	2148.62	0.0762593
1756.42	0.0384266	2147.34	0.101722	2147.34	0.107764	2147.34	0.0505735
1754.84	0.036549	2146.07	0.0830293	2146.07	0.121108	2146.07	0.0761917
1753.25	0.0425063	2144.79	0.121257	2144.79	0.181821	2144.79	0.0847055
1751.67	0.0489221	2143.52	0.0684319	2143.52	0.139761	2143.52	0.110309
1750.08	0.0346068	2142.24	0.0592419	2142.24	0.108958	2142.24	0.0846352
1748.5	0.0336529	2140.96	0.101247	2140.96	0.115881	2140.96	0.11023
1746.91	0.046052	2139.69	0.0996348	2139.69	0.16291	2139.69	0.0931067
1745.32	0.0335874	2138.41	0.115088	2138.41	0.136931	2138.41	0.161393
1743.73	0.0446007	2137.13	0.0888368	2137.13	0.114975	2137.13	0.0844943
1742.15	0.0362828	2135.85	0.100495	2135.85	0.0465168	2135.85	0.118609
1740.56	0.0394699	2134.58	0.104567	2134.58	0.114368	2134.58	0.067352
1738.97	0.0320765	2133.3	0.0840187	2133.3	0.137318	2133.3	0.109992
1737.38	0.0352634	2132.02	0.0540101	2132.02	0.157854	2132.02	0.135552
1735.79	0.0425867	2130.74	0.0505138	2130.74	0.205629	2130.74	0.101381
1734.21	0.0388745	2129.46	0.0886742	2129.46	0.111574	2129.46	0.135464
1732.62	0.0415982	2128.18	0.0927501	2128.18	0.152133	2128.18	0.101305
1731.03	0.0447804	2126.9	0.113859	2126.9	0.119794	2126.9	0.0671587
1729.44	0.0456639	2125.62	0.0838694	2125.62	0.14192	2125.62	0.118281
1727.85	0.0594077	2124.34	0.108754	2124.34	0.124005	2124.34	0.0670941
1726.26	0.0377873	2123.07	0.0882315	2123.07	0.108488	2123.07	0.0926303
1724.66	0.0492312	2121.79	0.124455	2121.79	0.154615	2121.79	0.109636
1723.07	0.0537855	2120.5	0.0907029	2120.5	0.167124	2120.5	0.0584774
1721.48	0.0487003	2119.22	0.125029	2119.22	0.104414	2119.22	0.118076
1719.89	0.0514173	2117.94	0.110194	2117.94	0.108919	2117.94	0.101001
1718.3	0.0509224	2116.66	0.159616	2116.66	0.114224	2116.66	0.169086
1716.7	0.045841	2115.38	0.123991	2115.38	0.14112	2115.38	0.109438
1715.11	0.0536008	2114.1	0.103491	2114.1	0.14642	2114.1	0.0668363
1713.52	0.0622743	2112.82	0.0905536	2112.82	0.158109	2112.82	0.177448
1711.92	0.0626942	2111.54	0.126729	2111.54	0.121843	2111.54	0.0923009
1710.33	0.0672379	2110.26	0.111913	2110.26	0.133536	2110.26	0.143313
1708.74	0.0635327	2108.97	0.106532	2108.97	0.191572	2108.97	0.117748
1707.14	0.071739	2107.69	0.0369809	2107.69	0.165703	2107.69	0.109201
1705.55	0.0662027	2106.41	0.0731437	2106.41	0.14224	2106.41	0.0751468
1703.95	0.0592952	2105.13	0.0432416	2105.13	0.175484	2105.13	0.151634
1702.35	0.0578837	2103.84	0.132223	2103.84	0.17519	2103.84	0.0920814
1700.76	0.0647111	2102.56	0.0740264	2102.56	0.118206	2102.56	0.168539
1699.16	0.0751964	2101.28	0.0950671	2101.28	0.140266	2101.28	0.0580167
1697.57	0.0586851	2099.99	0.0764979	2099.99	0.175092	2099.99	0.0834751
1695.97	0.0709972	2098.71	0.0975386	2098.71	0.0965975	2098.71	0.108925
1694.37	0.0823891	2097.42	0.0544711	2097.42	0.15615	2097.42	0.108886
1692.77	0.0713732	2096.14	0.137697	2096.14	0.0848638	2096.14	0.091862
1691.18	0.076818	2094.85	0.102182	2094.85	0.136425	2094.85	0.134279
1689.58	0.0786045	2093.57	0.100584	2093.57	0.118589	2093.57	0.0748108
1687.98	0.0845022	2092.28	0.0971103	2092.28	0.099973	2092.28	0.0662896
1686.38	0.0999911	2091	0.0597329	2091	0.144322	2091	0.142633
1684.78	0.0898965	2089.71	0.0920483	2089.71	0.0890465	2089.71	0.142588
1683.18	0.0971584	2088.43	0.0697475	2088.43	0.106292	2088.43	0.100126
1681.58	0.104417	2087.14	0.100165	2087.14	0.105216	2087.14	0.0661609
1679.98	0.115324	2085.86	0.0929214	2085.86	0.106524	2085.86	0.0915701
1678.38	0.120295	2084.57	0.132741	2084.57	0.163585	2084.57	0.0830545
1676.78	0.119331	2083.28	0.061525	2083.28	0.123484	2083.28	0.142361
1675.18	0.124755	2082	0.0806388	2082	0.137529	2082	0.13384
1673.58	0.121967	2080.71	0.0828107	2080.71	0.0998338	2080.71	0.0998984
1671.97	0.123283	2079.42	0.135771	2079.42	0.144126	2079.42	0.0659681
1670.37	0.130982	2078.13	0.0796503	2078.13	0.124748	2078.13	0.0574643
1668.77	0.133664	2076.85	0.0968661	2076.85	0.122868	2076.85	0.116725
1667.17	0.153661	2075.56	0.0858788	2075.56	0.13293	2075.56	0.108215
1665.56	0.153603	2074.27	0.103089	2074.27	0.112766	2074.27	0.0997086
1663.96	0.162656	2072.98	0.0658019	2072.98	0.115672	2072.98	0.133534
1662.36	0.158042	2071.69	0.0848902	2071.69	0.1623	2071.69	0.13349
1660.75	0.182116	2070.4	0.100212	2070.4	0.057091	2070.4	0.124983
1659.15	0.191156	2069.12	0.141819	2069.12	0.133113	2069.12	0.0487887
1657.54	0.212483	2067.83	0.0782722	2067.83	0.0859514	2067.83	0.0318396
1655.94	0.202402	2066.54	0.0353897	2066.54	0.123818	2066.54	0.0825642
1654.33	0.209158	2065.25	0.0713547	2065.25	0.163258	2065.25	0.150185
1652.73	0.226373	2063.96	0.0547676	2063.96	0.0986427	2063.96	0.124772
1651.12	0.239942	2062.67	0.0700824	2062.67	0.113458	2062.67	0.0909135
1649.51	0.265783	2061.38	0.0760114	2061.38	0.109214	2061.38	0.116235
1647.91	0.281155	2060.09	0.13633	2060.09	0.120849	2060.09	0.107743
1646.3	0.28289	2058.79	0.0991152	2058.79	0.121375	2058.79	0.0739046
1644.69	0.297345	2057.5	0.0731577	2057.5	0.121893	2057.5	0.116112
1643.08	0.314519	2056.21	0.0772082	2056.21	0.105753	2056.21	0.124518
1641.47	0.341681	2054.92	0.141236	2054.92	0.114999	2054.92	0.0822496
1639.87	0.358838	2053.63	0.0796833	2053.63	0.139313	2053.63	0.0822147
1638.26	0.383255	2052.34	0.100592	2052.34	0.156481	2052.34	0.0568522
1636.65	0.396313	2051.04	0.0690443	2051.04	0.0840635	2051.04	0.0483807
1635.04	0.427971	2049.75	0.0974449	2049.75	0.0885521	2049.75	0.107428
1633.43	0.450995	2048.46	0.093991	2048.46	0.0993802	2048.46	0.149579
1631.82	0.472649	2047.17	0.0886682	2047.17	0.137943	2047.17	0.124223
1630.21	0.50019	2045.87	0.118925	2045.87	0.0758771	2045.87	0.039829
1628.6	0.520465	2044.58	0.145421	2044.58	0.135815	2044.58	0.14944
1626.98	0.555238	2043.29	0.0483961	2043.29	0.0935665	2043.29	0.157825
1625.37	0.609035	2041.99	0.0674164	2041.99	0.0877651	2041.99	0.132485
1623.76	0.60571	2040.7	0.0920406	2040.7	0.0605808	2040.7	0.031289
1622.15	0.647238	2039.41	0.116648	2039.41	0.059529	2039.41	0.166109
1620.54	0.686034	2038.11	0.0945096	2038.11	0.0735247	2038.11	0.0902219
1618.92	0.678618	2036.82	0.08359	2036.82	0.104125	2036.82	0.0986105
1617.31	0.682075	2035.52	0.0894936	2035.52	0.104655	2035.52	0.0817256
1615.7	0.724459	2034.23	0.10101	2034.23	0.0790774	2034.23	0.0816907
1614.08	0.712514	2032.93	0.106913	2032.93	0.125488	2032.93	0.106917
1612.47	0.743562	2031.64	0.0903969	2031.64	0.0769778	2031.64	0.047944
1610.85	0.769622	2030.34	0.0925628	2030.34	0.0862158	2030.34	0.106839
1609.24	0.76672	2029.04	0.0405663	2029.04	0.13102	2029.04	0.1068
1607.62	0.794571	2027.75	0.076358	2027.75	0.125219	2027.75	0.0983457
1606.01	0.784436	2026.45	0.0916009	2026.45	0.13444	2026.45	0.0814813
1604.39	0.797353	2025.15	0.114305	2025.15	0.114423	2025.15	0.0982702
1602.78	0.799422	2023.86	0.11087	2023.86	0.0667614	2023.86	0.140285
1601.16	0.830858	2022.56	0.0981047	2022.56	0.141546	2022.56	0.0561498
1599.54	0.8284	2021.26	0.0666809	2021.26	0.0883724	2021.26	0.114972
1597.92	0.85214	2019.97	0.111758	2019.97	0.123645	2019.97	0.114931
1596.31	0.860967	2018.67	0.0243879	2018.67	0.126543	2018.67	0.106486
1594.69	0.876564	2017.37	0.110493	2017.37	0.0876101	2017.37	0.0980438
1593.07	0.863267	2016.07	0.105203	2016.07	0.0794647	2016.07	0.140015
1591.45	0.883819	2014.77	0.129736	2014.77	0.0902641	2014.77	0.0727672
1589.83	0.88	2013.47	0.0741098	2013.47	0.0576663	2013.47	0.139925
1588.21	0.883398	2012.18	0.096775	2012.18	0.0897504	2012.18	0.114687
1586.59	0.906639	2010.88	0.0840348	2010.88	0.112372	2010.88	0.0894589
1584.97	0.875313	2009.58	0.0824756	2009.58	0.105809	2009.58	0.0558448
1583.35	0.901704	2008.28	0.0809174	2008.28	0.139454	2008.28	0.0893864
1581.73	0.894276	2006.98	0.118472	2006.98	0.0587998	2006.98	0.0809586
1580.11	0.883249	2005.68	0.0964206	2005.68	0.129482	2005.68	0.114485
1578.49	0.855109	2004.38	0.0799707	2004.38	0.0449187	2004.38	0.114444
1576.87	0.841391	2003.08	0.10634	2003.08	0.113212	2003.08	0.0640798
1575.25	0.85425	2001.78	0.0936128	2001.78	0.0475849	2001.78	0.064048
1573.62	0.80362	2000.48	0.142296	2000.48	0.0497049	2000.48	0.131091
1572	0.776868	1999.17	0.0867769	1999.17	0.11876	1999.17	0.0723667
1570.38	0.748327	1997.87	0.07592	1997.87	0.102763	1997.87	0.114241
1568.75	0.735544	1996.57	0.0873855	1996.57	0.0450576	1996.57	0.13096
1567.13	0.72457	1995.27	0.108145	1995.27	0.135316	1995.27	0.0974024
1565.51	0.711799	1993.97	0.0824167	1993.97	0.0587391	1993.97	0.114119
1563.88	0.680596	1992.67	0.0808634	1992.67	0.129303	1992.67	0.114078
1562.26	0.642665	1991.36	0.125782	1991.36	0.136922	1991.36	0.0637927
1560.63	0.634864	1990.06	0.0610375	1990.06	0.0910552	1990.06	0.113997
1559.01	0.605943	1988.76	0.04091	1988.76	0.0640757	1988.76	0.122328
1557.38	0.583325	1987.45	0.0263656	1987.45	0.0300395	1987.45	0.0971764
1555.76	0.572398	1986.15	0.115828	1986.15	0.0808921	1986.15	0.155718
1554.13	0.573599	1984.85	0.103131	1984.85	0.0633624	1984.85	0.105468
1552.5	0.511939	1983.54	0.116436	1983.54	0.10713	1983.54	0.113794
1550.87	0.510908	1982.24	0.0777517	1982.24	0.0597465	1982.24	0.10539
1549.25	0.484743	1980.93	0.12632	1980.93	0.147489	1980.93	0.0886255
1547.62	0.490449	1979.63	0.0765136	1979.63	0.0851931	1979.63	0.00497808
1545.99	0.464301	1978.33	0.0916636	1978.33	0.167395	1978.33	0.0885531
1544.36	0.462832	1977.02	0.116089	1977.02	0.141239	1977.02	0.0885169
1542.73	0.43939	1975.72	0.0663106	1975.72	0.0954623	1975.72	0.121908
1541.1	0.440617	1974.41	0.0517884	1974.41	0.147806	1974.41	0.0967999
1539.48	0.420328	1973.1	0.0910394	1973.1	0.09342	1973.1	0.11347
1537.85	0.425143	1971.8	0.104319	1971.8	0.105731	1971.8	0.0967249
1536.22	0.412483	1970.49	0.110187	1970.49	0.132947	1970.49	0.0799852
1534.58	0.409681	1969.19	0.112343	1969.19	0.0958375	1969.19	0.146747
1532.95	0.385383	1967.88	0.121911	1967.88	0.132458	1967.88	0.155049
1531.32	0.399606	1966.57	0.120362	1966.57	0.161227	1966.57	0.0381475
1529.69	0.390095	1965.27	0.0891763	1965.27	0.144512	1965.27	0.0881914
1528.06	0.373426	1963.96	0.11911	1963.96	0.0611987	1963.96	0.0881552
1526.43	0.37198	1962.65	0.12312	1962.65	0.0789932	1962.65	0.0714348
1524.79	0.36561	1961.34	0.0993606	1961.34	0.131251	1961.34	0.0964238
1523.16	0.357009	1960.04	0.107072	1960.04	0.122389	1960.04	0.121405
1521.53	0.369879	1958.73	0.0777657	1958.73	0.134684	1958.73	0.0713349
1519.89	0.349654	1957.42	0.111382	1957.42	0.123481	1957.42	0.0629651
1518.26	0.359837	1956.11	0.102438	1956.11	0.143599	1956.11	0.0712686
1516.63	0.352585	1954.8	0.0953479	1954.8	0.0713458	1954.8	0.071235
1514.99	0.338186	1953.49	0.0494244	1953.49	0.103991	1953.49	0.104531
1513.36	0.34881	1952.18	0.10521	1952.18	0.0841953	1952.18	0.104492
1511.72	0.356304	1950.87	0.118453	1950.87	0.0784923	1950.87	0.13777
1510.09	0.328518	1949.56	0.107677	1949.56	0.171349	1949.56	0.0960861
1508.45	0.365482	1948.25	0.0839564	1948.25	0.135911	1948.25	0.0793954
1506.81	0.34038	1946.94	0.0861152	1946.94	0.119254	1946.94	0.071036
1505.18	0.342513	1945.63	0.136301	1945.63	0.185474	1945.63	0.104297
1503.54	0.3326	1944.32	0.147689	1944.32	0.146143	1944.32	0.0709693
1501.9	0.337412	1943.01	0.112898	1943.01	0.163884	1943.01	0.129181
1500.26	0.327057	1941.7	0.0744347	1941.7	0.0737802	1941.7	0.112499
1498.63	0.32384	1940.39	0.143053	1940.39	0.124338	1940.39	0.120777
1496.99	0.338905	1939.08	0.0953638	1939.08	0.120983	1939.08	0.0458878
1495.35	0.337026	1937.77	0.123358	1937.77	0.199627	1937.77	0.153952
1493.71	0.340938	1936.45	0.140269	1936.45	0.175967	1936.45	0.0541433
1492.07	0.351536	1935.14	0.094452	1935.14	0.0960915	1935.14	0.0541132
1490.43	0.329163	1933.83	0.0836955	1933.83	0.11382	1933.83	0.0790145
1488.79	0.318379	1932.52	0.131953	1932.52	0.210365	1932.52	0.0623617
1487.15	0.31695	1931.2	0.100918	1931.2	0.134435	1931.2	0.0290993
1485.51	0.31018	1929.89	0.0754178	1929.89	0.131085	1929.89	0.0872172
1483.87	0.322107	1928.58	0.0978502	1928.58	0.14801	1928.58	0.0373522
1482.23	0.330467	1927.26	0.10922	1927.26	0.109569	1927.26	0.145268
1480.59	0.318361	1925.95	0.0726778	1925.95	0.181862	1925.95	0.128619
1478.94	0.318712	1924.64	0.113522	1924.64	0.127049	1924.64	0.103674
1477.3	0.313283	1923.32	0.132248	1923.32	0.131501	1923.32	0.120233
1475.66	0.327419	1922.01	0.088358	1922.01	0.161667	1922.01	0.136786
1474.02	0.32599	1920.69	0.119975	1920.69	0.106895	1920.69	0.128445
1472.37	0.333453	1919.38	0.0871445	1919.38	0.154973	1919.38	0.0869288
1470.73	0.321803	1918.06	0.100345	1918.06	0.209272	1918.06	0.111773
1469.08	0.324375	1916.75	0.122739	1916.75	0.168532	1916.75	0.070273
1467.44	0.333163	1915.43	0.15617	1915.43	0.149617	1915.43	0.111692
1465.79	0.348611	1914.11	0.0957628	1914.11	0.157957	1914.11	0.0867848
1464.15	0.332085	1912.8	0.0703229	1912.8	0.165507	1912.8	0.045311
1462.5	0.339092	1911.48	0.107423	1911.48	0.141154	1911.48	0.0949989
1460.86	0.331892	1910.17	0.0746356	1910.17	0.133922	1910.17	0.0783923
1459.21	0.320261	1908.85	0.106207	1908.85	0.150041	1908.85	0.13634
1457.56	0.343679	1907.53	0.0532152	1907.53	0.143596	1907.53	0.11145
1455.92	0.357774	1906.21	0.132565	1906.21	0.0710433	1906.21	0.136251
1454.27	0.343928	1904.9	0.147564	1904.9	0.223238	1904.9	0.111369
1452.62	0.325651	1903.58	0.107455	1903.58	0.19657	1903.58	0.0864969
1450.97	0.338855	1902.26	0.109605	1902.26	0.172245	1902.26	0.0781851
1449.33	0.344962	1900.94	0.115428	1900.94	0.075646	1900.94	0.0781506
1447.68	0.328027	1899.63	0.0533074	1899.63	0.175674	1899.63	0.127755
1446.03	0.342107	1898.31	0.0940183	1898.31	0.128053	1898.31	0.127712
1444.38	0.331822	1896.99	0.112689	1896.99	0.134053	1896.99	0.102858
1442.73	0.355635	1895.67	0.0909793	1895.67	0.165678	1895.67	0.0532061
1441.08	0.341371	1894.35	0.10414	1894.35	0.123524	1894.35	0.0779779
1439.43	0.351451	1893.03	0.108124	1893.03	0.131848	1893.03	0.0779434
1437.78	0.347811	1891.71	0.148793	1891.71	0.158027	1891.71	0.0779089
1436.13	0.351253	1890.39	0.08491	1890.39	0.167896	1890.39	0.127453
1434.48	0.348941	1889.07	0.070559	1889.07	0.141289	1889.07	0.0695784
1432.82	0.359013	1887.75	0.147876	1887.75	0.0937464	1887.75	0.0778055
1431.17	0.364217	1886.43	0.13169	1886.43	0.0904364	1886.43	0.110806
1429.52	0.364115	1885.11	0.0861815	1885.11	0.0840244	1885.11	0.12728
1427.87	0.367989	1883.79	0.174449	1883.79	0.116387	1883.79	0.102469
1426.21	0.37186	1882.47	0.114298	1882.47	0.168899	1882.47	0.0611588
1424.56	0.376176	1881.14	0.13843	1881.14	0.141555	1881.14	0.0693799
1422.91	0.369885	1879.82	0.0892887	1879.82	0.116538	1879.82	0.0858503
1421.25	0.39186	1878.5	0.0859444	1878.5	0.152749	1878.5	0.127065
1419.6	0.391311	1877.18	0.143013	1877.18	0.0711804	1877.18	0.135271
1417.94	0.406651	1875.85	0.0975664	1875.85	0.179437	1875.85	0.102237
1416.29	0.411834	1874.53	0.0612812	1874.53	0.121903	1874.53	0.11869
1414.63	0.395399	1873.21	0.0963701	1873.21	0.146475	1873.21	0.110404
1412.97	0.411168	1871.89	0.153404	1871.89	0.10755	1871.89	0.118607
1411.32	0.407968	1870.56	0.0823744	1870.56	0.147605	1870.56	0.085599
1409.66	0.422408	1869.24	0.0808651	1869.24	0.114109	1869.24	0.126763
1408	0.433312	1867.91	0.121415	1867.91	0.132481	1867.91	0.102004
1406.35	0.412041	1866.59	0.118072	1866.59	0.0866227	1866.59	0.0772541
1404.69	0.441009	1865.27	0.103762	1865.27	0.0933814	1865.27	0.101927
1403.03	0.436927	1863.94	0.0839788	1863.94	0.090096	1863.94	0.0854197
1401.37	0.451343	1862.62	0.0769889	1862.62	0.112316	1862.62	0.0524522
1399.71	0.441534	1861.29	0.0846211	1861.29	0.064183	1861.29	0.0771166
1398.05	0.4489	1859.97	0.112339	1859.97	0.094136	1859.97	0.110002
1396.4	0.461543	1858.64	0.182058	1858.64	0.0962599	1858.64	0.0276761
1394.74	0.468462	1857.31	0.0801091	1857.31	0.0713374	1857.31	0.101695
1393.08	0.505736	1855.99	0.0895581	1855.99	0.0750022	1855.99	0.109882
1391.41	0.506484	1854.66	0.157414	1854.66	0.174464	1854.66	0.0933929
1389.75	0.528342	1853.34	0.0500494	1853.34	0.140264	1853.34	0.085133
1388.09	0.530843	1852.01	0.052204	1852.01	0.0968231	1852.01	0.0686543
1386.43	0.554884	1850.68	0.11821	1850.68	0.14141	1850.68	0.0521813
1384.77	0.566168	1849.36	0.134941	1849.36	0.0871666	1849.36	0.101463
1383.11	0.603375	1848.03	0.0458938	1848.03	0.133282	1848.03	0.109641
1381.44	0.591799	1846.7	0.0717516	1846.7	0.138487	1846.7	0.126032
1379.78	0.625032	1845.37	0.119479	1845.37	0.0680778	1845.37	0.0849179
1378.12	0.645514	1844.04	0.081518	1844.04	0.141948	1844.04	0.125947
1376.45	0.67477	1842.72	0.0891292	1842.72	0.0792675	1842.72	0.0848464
1374.79	0.64914	1841.39	0.107673	1841.39	0.0790801	1841.39	0.117651
1373.13	0.699889	1840.06	0.0697359	1840.06	0.0981653	1840.06	0.0765665
1371.46	0.698837	1838.73	0.111957	1838.73	0.10183	1838.73	0.117568
1369.8	0.732444	1837.4	0.101349	1837.4	0.0646465	1837.4	0.133937
1368.13	0.763404	1836.07	0.114417	1836.07	0.0960583	1836.07	0.0846675
1366.47	0.793914	1834.74	0.0819667	1834.74	0.0943261	1834.74	0.133849
1364.8	0.823094	1833.41	0.0768308	1833.41	0.0979908	1833.41	0.117402
1363.13	0.832976	1832.08	0.120835	1832.08	0.0877881	1832.08	0.0681604
1361.47	0.862136	1830.75	0.0738436	1830.75	0.0768191	1830.75	0.133716
1359.8	0.872006	1829.42	0.0741709	1829.42	0.140539	1829.42	0.0926861
1358.13	0.893698	1828.09	0.0563076	1828.09	0.0756821	1828.09	0.0516704
1356.46	0.914069	1826.76	0.08028	1826.76	0.0962795	1826.76	0.125389
1354.79	0.947126	1825.43	0.0551495	1825.43	0.0791636	1825.43	0.0516102
1353.13	0.949528	1824.1	0.0700238	1824.1	0.0412793	1824.1	0.0679632
1351.46	0.9795	1822.76	0.115797	1822.76	0.1365	1822.76	0.0925002
1349.79	0.955202	1821.43	0.0688655	1821.43	0.0955423	1821.43	0.0597086
1348.12	0.961975	1820.1	0.100084	1820.1	0.0907407	1820.1	0.0678642
1346.45	0.985365	1818.77	0.0949556	1818.77	0.14976	1818.77	0.0514601
1344.78	1	1817.43	0.106182	1817.43	0.114978	1817.43	0.05143
1343.11	0.959538	1816.1	0.079262	1816.1	0.102493	1816.1	0.100497
1341.44	0.963682	1814.77	0.0886673	1814.77	0.11614	1814.77	0.0431889
1339.77	0.922808	1813.43	0.0744726	1813.43	0.0606429	1813.43	0.0513401
1338.09	0.889815	1812.1	0.116549	1812.1	0.0581607	1812.1	0.10856
1336.42	0.868631	1810.77	0.0660532	1810.77	0.100227	1810.77	0.0758117
1334.75	0.861435	1809.43	0.0500555	1809.43	0.111567	1809.43	0.0676016
1333.08	0.828476	1808.1	0.0612724	1808.1	0.132882	1808.1	0.116614
1331.4	0.79728	1806.76	0.0724901	1806.76	0.106599	1806.76	0.132919
1329.73	0.801449	1805.43	0.107299	1805.43	0.0580598	1805.43	0.100189
1328.06	0.754124	1804.09	0.0478321	1804.09	0.0532909	1804.09	0.0838102
1326.38	0.727325	1802.76	0.127979	1802.76	0.0462108	1802.76	0.157291
1324.71	0.688757	1801.42	0.0685298	1801.42	0.0974402	1801.42	0.100073
1323.03	0.686405	1800.09	0.0652792	1800.09	0.14251	1800.09	0.1082
1321.36	0.673154	1798.75	0.0729057	1798.75	0.119325	1798.75	0.124489
1319.68	0.601929	1797.42	0.0334219	1797.42	0.0777366	1797.42	0.157097
1318	0.599159	1796.08	0.104448	1796.08	0.129695	1796.08	0.148887
1316.33	0.600751	1794.74	0.0631666	1794.74	0.00458661	1794.74	0.0917206
1314.65	0.578379	1793.41	0.105188	1793.41	0.0358427	1793.41	0.0508907
1312.97	0.563422	1792.07	0.156251	1792.07	0.0801178	1792.07	0.107961
1311.3	0.527133	1790.73	0.0516293	1790.73	0.0500729	1790.73	0.0916093
1309.62	0.506966	1789.39	0.113543	1789.39	0.0935695	1789.39	0.083418
1307.94	0.49508	1788.06	0.0849587	1788.06	0.0949229	1788.06	0.115994
1306.26	0.468404	1786.72	0.125135	1786.72	0.113893	1786.72	0.0507411
1304.58	0.47785	1785.38	0.0857102	1785.38	0.0295139	1785.38	0.0670112
1302.91	0.454668	1784.04	0.0227876	1784.04	0.0148116	1784.04	0.140316
1301.23	0.474116	1782.7	0.0629551	1782.7	0.0774086	1782.7	0.0669454
1299.55	0.438332	1781.36	0.0633348	1781.36	0.0374549	1781.36	0.0669126
1297.87	0.426475	1780.02	0.0637144	1780.02	0.0824308	1780.02	0.0913127
1296.18	0.423752	1778.68	0.0948176	1778.68	0.129685	1778.68	0.0587043
1294.5	0.416684	1777.34	0.0753159	1777.34	0.0782736	1777.34	0.131946
1292.82	0.400059	1776	0.0522083	1776	0.0765822	1776	0.140042
1291.14	0.392564	1774.66	0.0688468	1774.66	0.104699	1774.66	0.066749
1289.46	0.38377	1773.32	0.0800619	1773.32	0.138926	1773.32	0.0585791
1287.78	0.37932	1771.98	0.053355	1771.98	0.113532	1771.98	0.107362
1286.09	0.365324	1770.64	0.0988705	1770.64	0.0652272	1770.64	0.0991881
1284.41	0.33918	1769.3	0.0884148	1769.3	0.0658306	1769.3	0.0584852
1282.73	0.340383	1767.96	0.0887915	1767.96	0.105385	1767.96	0.0177963
1281.04	0.34202	1766.62	0.0404488	1766.62	0.0571083	1766.62	0.099073
1279.36	0.334113	1765.28	0.131038	1765.28	0.111157	1765.28	0.131549
1277.68	0.327077	1763.93	0.0899238	1763.93	0.149166	1763.93	0.107123
1275.99	0.325684	1762.59	0.061445	1762.59	0.107778	1762.59	0.139587
1274.3	0.319518	1761.25	0.0528106	1761.25	0.0915845	1761.25	0.115168
1272.62	0.296456	1759.91	0.0820391	1759.91	0.0746365	1759.91	0.0988806
1270.93	0.306332	1758.56	0.0391606	1758.56	0.0744859	1758.56	0.13945
1269.25	0.297578	1757.22	0.10803	1757.22	0.106357	1757.22	0.0582034
1267.56	0.301821	1755.88	0.0957904	1755.88	0.143559	1755.88	0.123122
1265.87	0.29177	1754.53	0.0835589	1754.53	0.119759	1754.53	0.0743754
1264.19	0.294712	1753.19	0.094744	1753.19	0.0784284	1753.19	0.0824573
1262.5	0.29376	1751.85	0.0897175	1751.85	0.0363478	1751.85	0.0824215
1260.81	0.277228	1750.5	0.0918993	1750.5	0.0849749	1750.5	0.0986122
1259.12	0.28017	1749.16	0.0832747	1749.16	0.126718	1749.16	0.122908
1257.43	0.26235	1747.81	0.0818572	1747.81	0.0915174	1747.81	0.155307
1255.74	0.267025	1746.47	0.0984329	1746.47	0.0525143	1746.47	0.171475
1254.05	0.261754	1745.12	0.0790194	1745.12	0.0934906	1745.12	0.0741368
1252.36	0.244381	1743.78	0.0740017	1743.78	0.0525505	1743.78	0.130844
1250.67	0.271098	1742.43	0.144536	1742.43	0.0695546	1742.43	0.0740683
1248.98	0.231694	1741.08	0.0927553	1741.08	0.101774	1741.08	0.0821375
1247.29	0.266177	1739.74	0.17045	1739.74	0.130168	1739.74	0.0983051
1245.6	0.249251	1738.39	0.106098	1738.39	0.108348	1738.39	0.122568
1243.91	0.238809	1737.04	0.079515	1737.04	0.106313	1737.04	0.106327
1242.22	0.240027	1735.7	0.0870834	1735.7	0.0791756	1735.7	0.0819957
1240.53	0.237792	1734.35	0.103637	1734.35	0.127336	1734.35	0.0819599
1238.83	0.210099	1733	0.116592	1733	0.0850064	1733	0.0819245
1237.14	0.231597	1731.65	0.115174	1731.65	0.0624573	1731.65	0.146634
1235.45	0.220307	1730.31	0.101181	1730.31	0.117426	1730.31	0.122312
1233.75	0.221958	1728.96	0.0620583	1728.96	0.0682811	1728.96	0.13845
1232.06	0.216281	1727.61	0.137846	1727.61	0.119446	1727.61	0.0413381
1230.36	0.21707	1726.26	0.131041	1726.26	0.119693	1726.26	0.114097
1228.67	0.217859	1724.91	0.0793721	1724.91	0.135136	1724.91	0.122142
1226.97	0.202706	1723.56	0.0851396	1723.56	0.0761522	1723.56	0.0897608
1225.28	0.208237	1722.21	0.105257	1722.21	0.180426	1722.21	0.13014
1223.58	0.203428	1720.86	0.100256	1720.86	0.0766681	1720.86	0.138178
1221.89	0.199054	1719.51	0.109604	1719.51	0.0959015	1719.51	0.105811
1220.19	0.208886	1718.16	0.0956396	1718.16	0.10223	1718.16	0.162324
1218.49	0.209678	1716.81	0.0709237	1716.81	0.104003	1716.81	0.0976542
1216.79	0.182064	1715.46	0.0677246	1715.46	0.0890879	1715.46	0.170301
1215.1	0.180278	1714.11	0.107539	1714.11	0.120443	1714.11	0.105652
1213.4	0.19828	1712.76	0.0989597	1712.76	0.133587	1712.76	0.137905
1211.7	0.198213	1711.41	0.133379	1711.41	0.0883474	1711.41	0.121716
[truncated: 894 more rows]

## Sheet: Fig2d)
Temperature	Weight	Temperature	Weight	Temperature	Weight	Temperature	Weight
℃	%	℃	%	℃	%	℃	%
	SN-800		SN-1350		SN-1450		SN-1550
33.717	100	37.815	100	34.905	100	37.838	100
33.7634	100.011	37.8356	99.9932	34.9672	99.974	37.8625	99.9816
33.8231	100.026	37.8675	99.9893	35.0237	99.961	37.8982	99.9875
33.8881	100.026	37.9109	99.9802	35.0941	99.9471	37.9422	99.9896
33.9682	100.017	37.9724	99.9685	35.1827	99.9317	38.0049	99.9875
34.0776	99.9997	38.0534	99.9554	35.2927	99.9147	38.0866	99.9815
34.2144	99.9759	38.1653	99.9415	35.4299	99.8962	38.1964	99.9715
34.3797	99.9468	38.312	99.9278	35.5943	99.876	38.3381	99.9578
34.5801	99.9151	38.4929	99.9152	35.792	99.8549	38.5126	99.9417
34.8218	99.8831	38.7056	99.9042	36.0281	99.8338	38.7251	99.9252
35.1052	99.853	38.959	99.8947	36.3049	99.8142	38.9741	99.9105
35.4273	99.8257	39.2559	99.8863	36.6163	99.7977	39.2658	99.8989
35.7901	99.8013	39.5946	99.8781	36.9638	99.7854	39.5971	99.8904
36.1933	99.7792	39.9721	99.8696	37.3498	99.7773	39.9653	99.8836
36.63	99.7584	40.3847	99.8602	37.7801	99.7729	40.374	99.8757
37.1109	99.7384	40.837	99.8501	38.2455	99.7701	40.8196	99.8639
37.628	99.719	41.3251	99.8394	38.7433	99.7667	41.2976	99.8465
38.1818	99.7011	41.846	99.8286	39.2688	99.7598	41.8083	99.8232
38.7641	99.6853	42.3974	99.8181	39.8218	99.7472	42.3488	99.7952
39.3721	99.6719	42.9811	99.8079	40.4008	99.7277	42.9196	99.7644
40.0052	99.6603	43.5869	99.7976	41.008	99.7011	43.5188	99.7334
40.6705	99.649	44.2227	99.7863	41.6369	99.6691	44.1433	99.7039
41.3558	99.6366	44.882	99.7731	42.2884	99.634	44.7934	99.6773
42.0612	99.6219	45.5605	99.7569	42.9634	99.5987	45.4617	99.6543
42.7867	99.6047	46.2564	99.7375	43.6562	99.5655	46.1465	99.6348
43.534	99.5853	46.9733	99.7153	44.3651	99.5355	46.8491	99.6184
44.2983	99.5644	47.7095	99.6916	45.0936	99.5085	47.5729	99.6042
45.0766	99.5421	48.4592	99.6681	45.8389	99.4834	48.3171	99.5908
45.8684	99.518	49.2219	99.6465	46.5982	99.4587	49.075	99.5766
46.6769	99.4909	49.9965	99.6279	47.3775	99.433	49.8427	99.5604
47.4997	99.4595	50.7869	99.6128	48.1669	99.4057	50.626	99.5414
48.3324	99.4226	51.5905	99.6009	48.968	99.3767	51.4258	99.5199
49.1788	99.3795	52.4097	99.5911	49.7835	99.3465	52.2372	99.4968
50.0374	99.3305	53.2378	99.5824	50.6159	99.3161	53.0586	99.4742
50.9071	99.2775	54.0755	99.5736	51.4562	99.2863	53.8946	99.454
51.7883	99.2235	54.9268	99.5641	52.3078	99.2579	54.7398	99.4383
52.6821	99.172	55.786	99.5537	53.1752	99.2316	55.5983	99.4278
53.5819	99.1265	56.6578	99.5425	54.0549	99.2076	56.4676	99.4221
54.4956	99.0893	57.5412	99.5309	54.9411	99.186	57.3443	99.4196
55.4193	99.0612	58.4339	99.5193	55.8356	99.1667	58.2358	99.4179
56.3487	99.041	59.3351	99.5082	56.7438	99.1499	59.1358	99.4145
57.2858	99.0266	60.2414	99.4978	57.6596	99.1359	60.0425	99.4078
58.2334	99.0151	61.1588	99.4881	58.588	99.1251	60.9566	99.3966
59.1858	99.0041	62.084	99.4788	59.5274	99.1172	61.8799	99.3812
60.1487	98.9918	63.0179	99.4694	60.4723	99.1113	62.8122	99.362
61.1188	98.9773	63.9583	99.4591	61.4234	99.1056	63.7473	99.3406
62.0928	98.9605	64.9011	99.4475	62.3793	99.0982	64.6912	99.3183
63.0718	98.9415	65.8462	99.4344	63.3415	99.0873	65.6405	99.2969
64.0585	98.9205	66.7963	99.4203	64.3131	99.0722	66.5908	99.2772
65.0482	98.898	67.7523	99.406	65.2883	99.0534	67.5482	99.2597
66.0427	98.8747	68.7132	99.3929	66.2683	99.0323	68.5089	99.244
67.0386	98.8514	69.6804	99.382	67.2557	99.0105	69.4719	99.2295
68.0368	98.8293	70.651	99.374	68.2462	98.9894	70.4368	99.2157
69.0396	98.8095	71.6221	99.369	69.2404	98.9689	71.41	99.203
70.0468	98.7926	72.5956	99.3662	70.2363	98.9481	72.389	99.1923
71.058	98.7786	73.5728	99.3645	71.2393	98.9251	73.3707	99.1852
72.0701	98.7665	74.5525	99.3623	72.2408	98.8983	74.3546	99.1829
73.0815	98.7546	75.5342	99.3581	73.2454	98.8672	75.3421	99.1858
74.0923	98.7412	76.5199	99.3511	74.2511	98.8332	76.3274	99.1927
75.104	98.7247	77.5089	99.3411	75.2576	98.7994	77.3153	99.2017
76.1148	98.705	78.4976	99.3291	76.2656	98.7696	78.3046	99.2105
77.1327	98.6827	79.4888	99.3166	77.2779	98.7468	79.2973	99.2173
78.1544	98.6595	80.4824	99.3049	78.2961	98.7321	80.2933	99.2209
79.1766	98.6373	81.4775	99.2953	79.3142	98.7242	81.2942	99.2213
80.1967	98.6179	82.4736	99.2883	80.3333	98.7206	82.2899	99.219
81.218	98.6033	83.4682	99.2836	81.3539	98.7181	83.2933	99.215
82.2401	98.5948	84.4681	99.2808	82.3773	98.7143	84.2956	99.2103
83.2667	98.5932	85.4709	99.2792	83.3987	98.7078	85.2968	99.2062
84.2944	98.5986	86.4737	99.2782	84.4226	98.6983	86.302	99.2032
85.3217	98.6091	87.4769	99.2774	85.4458	98.6863	87.3087	99.2017
86.345	98.6214	88.4802	99.2763	86.4763	98.6721	88.3157	99.2014
87.3704	98.6308	89.4843	99.2744	87.5022	98.6558	89.3224	99.2016
88.4004	98.6326	90.4867	99.2713	88.5327	98.6369	90.3272	99.2014
89.43	98.6235	91.4894	99.2665	89.5623	98.6144	91.3347	99.1997
90.4592	98.6027	92.4931	99.2601	90.5905	98.5876	92.3414	99.1956
91.4865	98.5716	93.5002	99.252	91.6179	98.5559	93.3452	99.1882
92.5108	98.5341	94.5047	99.2426	92.6435	98.5201	94.3483	99.177
93.5321	98.4948	95.5051	99.2323	93.6673	98.4815	95.3534	99.1614
94.5551	98.4577	96.5022	99.2217	94.6912	98.4424	96.3563	99.1418
95.5786	98.4257	97.4945	99.2117	95.7126	98.4051	97.3588	99.1189
96.5999	98.3999	98.4916	99.203	96.7347	98.3714	98.361	99.094
97.6217	98.3798	99.4874	99.1962	97.7567	98.3423	99.3592	99.0689
98.6411	98.3642	100.485	99.1914	98.773	98.318	100.353	99.0456
99.6567	98.3518	101.48	99.1883	99.7871	98.2974	101.346	99.0257
100.668	98.3417	102.47	99.1863	100.803	98.279	102.339	99.0108
101.676	98.3339	103.457	99.1843	101.818	98.2614	103.329	99.0015
102.687	98.3289	104.443	99.1818	102.827	98.2436	104.316	98.9983
103.694	98.3272	105.428	99.1784	103.834	98.2255	105.304	99.0003
104.698	98.3292	106.408	99.174	104.838	98.2076	106.291	99.0065
105.698	98.3349	107.388	99.1689	105.843	98.1911	107.272	99.0155
106.694	98.3434	108.367	99.1637	106.847	98.1771	108.25	99.0259
107.691	98.3533	109.34	99.1585	107.848	98.166	109.228	99.0369
108.689	98.3623	110.315	99.1536	108.847	98.1577	110.208	99.0479
109.686	98.3673	111.288	99.1489	109.844	98.1514	111.186	99.0585
110.678	98.3655	112.263	99.1444	110.841	98.1456	112.164	99.0685
111.668	98.3545	113.233	99.1399	111.836	98.139	113.137	99.0771
112.656	98.3332	114.205	99.1359	112.83	98.1303	114.108	99.0832
113.643	98.3026	115.175	99.1325	113.818	98.1187	115.078	99.0857
114.631	98.2652	116.142	99.1299	114.804	98.1036	116.047	99.0838
115.616	98.2249	117.108	99.1279	115.788	98.0852	117.014	99.0778
116.6	98.1856	118.078	99.1261	116.776	98.0638	117.982	99.0688
117.582	98.1508	119.043	99.1238	117.761	98.0401	118.949	99.0589
118.564	98.1229	120.009	99.1206	118.745	98.0152	119.914	99.0501
119.545	98.1029	120.97	99.1163	119.728	97.99	120.881	99.0435
120.526	98.0899	121.931	99.1112	120.708	97.9655	121.847	99.0393
121.506	98.082	122.891	99.106	121.689	97.9418	122.813	99.0362
122.484	98.0762	123.85	99.1012	122.669	97.9189	123.776	99.032
123.457	98.0696	124.809	99.0974	123.645	97.8963	124.738	99.0249
124.431	98.0601	125.77	99.0943	124.622	97.8736	125.699	99.0138
125.406	98.0473	126.729	99.0916	125.597	97.8506	126.659	98.9992
126.38	98.032	127.685	99.0885	126.574	97.8279	127.618	98.9828
127.349	98.0163	128.641	99.0843	127.549	97.8063	128.577	98.9673
128.317	98.002	129.599	99.0786	128.521	97.7869	129.537	98.9553
129.285	97.9904	130.557	99.0711	129.492	97.7707	130.496	98.9487
130.255	97.9816	131.513	99.0622	130.463	97.7584	131.454	98.948
131.223	97.9746	132.468	99.0525	131.434	97.7498	132.411	98.9527
132.194	97.9678	133.424	99.0427	132.404	97.7444	133.366	98.9608
133.16	97.9595	134.38	99.0335	133.373	97.7407	134.32	98.9706
134.126	97.9489	135.335	99.0255	134.342	97.737	135.276	98.9802
135.093	97.9367	136.282	99.019	135.308	97.7317	136.23	98.988
136.06	97.9243	137.226	99.0139	136.273	97.7236	137.18	98.9932
137.026	97.914	138.173	99.0101	137.237	97.7126	138.132	98.9951
137.988	97.9072	139.119	99.007	138.204	97.6992	139.081	98.9934
138.949	97.9046	140.066	99.0042	139.168	97.6841	140.027	98.9882
139.909	97.9049	141.013	99.0014	140.13	97.6685	140.974	98.9798
140.867	97.906	141.96	98.9984	141.09	97.6529	141.923	98.9691
141.823	97.905	142.905	98.9954	142.045	97.6377	142.868	98.9569
142.777	97.8995	143.848	98.9924	142.999	97.6231	143.812	98.9441
143.732	97.8878	144.79	98.9896	143.955	97.609	144.755	98.931
144.685	97.8696	145.732	98.9868	144.911	97.5956	145.698	98.9174
145.637	97.8458	146.671	98.9835	145.864	97.5831	146.642	98.9031
146.588	97.8182	147.612	98.9792	146.818	97.5718	147.581	98.888
147.537	97.7895	148.551	98.9732	147.773	97.5623	148.52	98.8726
148.486	97.762	149.49	98.9652	148.724	97.5548	149.456	98.8579
149.433	97.7379	150.426	98.9554	149.669	97.5491	150.394	98.8451
150.376	97.7184	151.361	98.9446	150.614	97.5445	151.331	98.8353
151.32	97.7037	152.291	98.9341	151.557	97.5398	152.264	98.8291
152.262	97.6934	153.223	98.9252	152.498	97.5336	153.196	98.8267
153.206	97.6864	154.152	98.9193	153.439	97.5255	154.127	98.8276
154.145	97.682	155.083	98.9169	154.38	97.5152	155.057	98.8316
155.087	97.6796	156.014	98.9179	155.32	97.5038	155.987	98.8381
156.025	97.6787	156.943	98.9212	156.26	97.4923	156.916	98.8462
156.963	97.6785	157.872	98.9254	157.196	97.4815	157.844	98.8548
157.901	97.6775	158.796	98.929	158.132	97.4718	158.77	98.8627
158.836	97.6738	159.72	98.9308	159.065	97.463	159.693	98.8684
159.769	97.6653	160.637	98.9299	159.998	97.4548	160.616	98.8707
160.701	97.6505	161.556	98.9261	160.93	97.4464	161.538	98.8685
161.632	97.6292	162.48	98.9196	161.86	97.4376	162.459	98.8614
162.561	97.6025	163.4	98.9109	162.786	97.4279	163.379	98.8495
163.491	97.5727	164.318	98.901	163.714	97.4172	164.302	98.8338
164.418	97.5428	165.235	98.8907	164.643	97.4056	165.223	98.8158
165.345	97.5156	166.153	98.881	165.572	97.3929	166.143	98.798
166.27	97.4933	167.068	98.8722	166.498	97.3793	167.058	98.7823
167.196	97.4775	167.981	98.8642	167.422	97.3652	167.974	98.7707
168.12	97.4685	168.897	98.8568	168.345	97.3508	168.89	98.7635
169.042	97.4658	169.813	98.8496	169.268	97.3368	169.805	98.7605
169.966	97.4681	170.729	98.8426	170.19	97.3237	170.721	98.7605
170.89	97.474	171.644	98.8358	171.111	97.3123	171.633	98.762
171.812	97.4824	172.556	98.8293	172.03	97.3033	172.546	98.7638
172.732	97.4924	173.468	98.8233	172.95	97.2967	173.46	98.7652
173.651	97.5033	174.379	98.8177	173.87	97.2917	174.372	98.7659
174.571	97.5141	175.289	98.8123	174.79	97.2868	175.286	98.7657
175.491	97.5236	176.198	98.8071	175.709	97.2801	176.199	98.7649
176.407	97.5303	177.107	98.802	176.628	97.2702	177.111	98.7635
177.324	97.5334	178.013	98.7969	177.546	97.2569	178.021	98.7618
178.238	97.5323	178.923	98.792	178.463	97.2413	178.93	98.7598
179.153	97.5272	179.835	98.7874	179.377	97.2256	179.837	98.7576
180.068	97.5186	180.744	98.7834	180.29	97.2121	180.745	98.7551
180.984	97.5072	181.649	98.7801	181.203	97.2027	181.655	98.7519
181.898	97.4933	182.554	98.7776	182.116	97.1974	182.562	98.7477
182.813	97.4771	183.464	98.7759	183.028	97.1949	183.468	98.7422
183.727	97.4586	184.371	98.7749	183.941	97.1928	184.372	98.7352
184.638	97.4382	185.272	98.7742	184.853	97.1888	185.281	98.7264
185.55	97.4164	186.176	98.7737	185.766	97.1813	186.188	98.7161
186.462	97.3941	187.083	98.7733	186.678	97.1703	187.094	98.7046
187.374	97.3721	187.987	98.7731	187.59	97.1568	187.997	98.6926
188.286	97.351	188.89	98.7731	188.499	97.1429	188.9	98.6811
189.196	97.3311	189.794	98.773	189.407	97.1306	189.801	98.6713
190.104	97.3127	190.697	98.7723	190.316	97.1213	190.703	98.6642
191.012	97.296	191.599	98.7705	191.226	97.1154	191.605	98.6604
191.92	97.2818	192.5	98.7672	192.135	97.1121	192.505	98.6603
192.828	97.2712	193.401	98.7619	193.044	97.1102	193.407	98.6636
193.736	97.2652	194.303	98.7548	193.952	97.1078	194.309	98.6696
194.643	97.2643	195.202	98.7458	194.857	97.1038	195.211	98.6776
195.547	97.2677	196.101	98.7353	195.76	97.0974	196.109	98.6868
196.451	97.2738	196.999	98.7233	196.663	97.0887	197.007	98.6959
197.355	97.2801	197.898	98.7104	197.567	97.0781	197.903	98.7036
198.254	97.2842	198.796	98.6968	198.468	97.0661	198.801	98.7085
199.154	97.2844	199.691	98.6833	199.371	97.0532	199.7	98.7097
200.058	97.2798	200.585	98.6707	200.273	97.0397	200.598	98.7069
200.957	97.2705	201.479	98.6602	201.174	97.0259	201.492	98.7012
201.854	97.2576	202.374	98.6528	202.074	97.012	202.39	98.694
202.753	97.242	203.266	98.649	202.973	96.9982	203.288	98.687
203.653	97.2249	204.162	98.6488	203.872	96.9849	204.184	98.6812
204.552	97.2073	205.057	98.6513	204.771	96.9722	205.076	98.676
205.45	97.19	205.951	98.6553	205.666	96.9598	205.965	98.6703
206.349	97.1737	206.843	98.6598	206.56	96.9474	206.855	98.6626
207.243	97.1587	207.735	98.6635	207.457	96.9345	207.746	98.6519
208.14	97.1453	208.626	98.6657	208.354	96.9213	208.637	98.6387
209.035	97.1334	209.515	98.6658	209.248	96.9083	209.526	98.6244
209.93	97.123	210.403	98.6637	210.144	96.8968	210.418	98.611
210.823	97.1146	211.29	98.6595	211.038	96.8878	211.306	98.6003
211.72	97.1093	212.18	98.6537	211.933	96.882	212.197	98.5931
212.614	97.1084	213.071	98.6468	212.827	96.879	213.086	98.5896
213.506	97.1134	213.959	98.6396	213.722	96.8778	213.974	98.5894
214.399	97.1251	214.849	98.6325	214.617	96.8772	214.864	98.5921
215.294	97.1432	215.735	98.626	215.506	96.8763	215.749	98.5972
216.189	97.1659	216.624	98.62	216.396	96.875	216.633	98.604
217.081	97.1902	217.513	98.6145	217.287	96.8739	217.519	98.6118
217.971	97.2118	218.399	98.6095	218.173	96.8737	218.407	98.6192
218.861	97.2267	219.284	98.6049	219.06	96.8743	219.294	98.6251
219.752	97.2317	220.167	98.6008	219.949	96.8752	220.179	98.6283
220.642	97.2253	221.047	98.5975	220.839	96.875	221.065	98.6286
221.531	97.208	221.929	98.5951	221.728	96.8719	221.952	98.6262
222.418	97.1817	222.812	98.5934	222.616	96.8648	222.836	98.6217
223.306	97.1493	223.696	98.5922	223.503	96.8531	223.722	98.616
224.193	97.114	224.583	98.5909	224.39	96.8374	224.604	98.6092
225.08	97.0783	225.467	98.5892	225.277	96.8188	225.486	98.6013
225.969	97.0447	226.352	98.5866	226.164	96.7989	226.37	98.5921
226.857	97.0151	227.236	98.5833	227.049	96.779	227.254	98.5815
227.743	96.9913	228.118	98.5796	227.933	96.7604	228.137	98.5703
228.628	96.9749	228.999	98.576	228.819	96.7441	229.019	98.5597
229.516	96.9669	229.88	98.5728	229.702	96.7309	229.9	98.5511
230.398	96.9671	230.76	98.5699	230.584	96.7213	230.782	98.545
231.281	96.9736	231.638	98.5667	231.468	96.7152	231.665	98.5408
232.164	96.9832	232.521	98.5622	232.352	96.712	232.546	98.5372
233.051	96.9917	233.404	98.5557	233.235	96.7103	233.425	98.5325
233.934	96.9952	234.286	98.547	234.119	96.7088	234.304	98.5256
234.815	96.991	235.166	98.5369	235.003	96.7058	235.183	98.5168
235.698	96.9786	236.044	98.5268	235.883	96.7002	236.064	98.5073
236.584	96.9595	236.92	98.5181	236.766	96.6915	236.946	98.4991
237.469	96.9372	237.795	98.5115	237.645	96.6793	237.826	98.4937
238.352	96.9152	238.672	98.5069	238.525	96.6643	238.702	98.4918
239.233	96.8961	239.551	98.5035	239.405	96.6473	239.582	98.4932
240.114	96.8806	240.432	98.5003	240.288	96.6296	240.462	98.4968
240.994	96.8672	241.311	98.4966	241.17	96.6125	241.34	98.5012
241.872	96.8536	242.189	98.4923	242.049	96.5973	242.216	98.5055
242.75	96.8377	243.067	98.4878	242.928	96.5846	243.093	98.5095
243.629	96.819	243.948	98.4838	243.806	96.5745	243.969	98.5133
244.507	96.7986	244.825	98.4809	244.685	96.5667	244.846	98.5175
245.386	96.7788	245.697	98.4793	245.562	96.5603	245.721	98.5224
246.266	96.7619	246.57	98.479	246.439	96.5544	246.596	98.5277
247.143	96.749	247.444	98.4798	247.317	96.5482	247.474	98.5326
248.023	96.7403	248.317	98.481	248.194	96.5413	248.352	98.5361
248.902	96.7349	249.192	98.4821	249.072	96.534	249.228	98.5373
249.779	96.7317	250.066	98.4825	249.947	96.5269	250.104	98.5359
250.654	96.7298	250.941	98.482	250.824	96.5209	250.98	98.5325
251.532	96.7293	251.815	98.4805	251.703	96.5169	251.854	98.5283
252.408	96.7303	252.689	98.4782	252.579	96.5151	252.725	98.525
253.284	96.7333	253.565	98.4757	253.458	96.5152	253.598	98.524
254.158	96.738	254.438	98.4734	254.333	96.5163	254.472	98.5259
255.035	96.7433	255.309	98.4714	255.207	96.5171	255.347	98.5303
255.913	96.7469	256.181	98.4696	256.081	96.5162	256.219	98.5366
256.79	96.7464	257.058	98.4672	256.957	96.5128	257.094	98.5434
257.667	96.7394	257.935	98.4633	257.832	96.5067	257.966	98.5499
258.543	96.7243	258.808	98.4571	258.706	96.4988	258.839	98.5553
259.416	96.7012	259.679	98.4485	259.582	96.4905	259.712	98.5591
260.291	96.6717	260.549	98.4381	260.456	96.4833	260.582	98.5609
261.168	96.6386	261.422	98.4273	261.33	96.4784	261.453	98.5605
262.045	96.6054	262.294	98.4175	262.201	96.4756	262.326	98.5582
262.921	96.5755	263.167	98.4102	263.074	96.4735	263.199	98.5542
263.795	96.5508	264.042	98.4063	263.946	96.47	264.071	98.5495
264.668	96.532	264.915	98.406	264.818	96.463	264.943	98.5451
265.538	96.5182	265.786	98.4089	265.69	96.4514	265.814	98.5424
266.412	96.5073	266.654	98.414	266.565	96.4356	266.684	98.5422
267.288	96.497	267.519	98.4202	267.44	96.4178	267.553	98.5445
268.163	96.4854	268.384	98.4265	268.316	96.4011	268.425	98.5486
269.034	96.4716	269.254	98.4319	269.188	96.388	269.296	98.5528
269.905	96.4559	270.126	98.436	270.056	96.3802	270.164	98.555
270.78	96.4392	270.999	98.4385	270.924	96.3777	271.033	98.554
271.652	96.4227	271.871	98.4397	271.795	96.3795	271.904	98.5493
272.522	96.4073	272.742	98.4398	272.665	96.384	272.773	98.542
273.394	96.3927	273.611	98.4391	273.536	96.3897	273.642	98.5337
274.266	96.3784	274.479	98.4379	274.406	96.3956	274.512	98.5267
275.138	96.3629	275.348	98.4358	275.276	96.4011	275.381	98.5224
276.01	96.3451	276.214	98.4323	276.145	96.4064	276.25	98.5216
276.881	96.324	277.081	98.4269	277.016	96.4112	277.118	98.5243
277.749	96.2997	277.949	98.4195	277.885	96.4154	277.989	98.5292
278.617	96.2731	278.818	98.4104	278.752	96.4184	278.856	98.535
279.489	96.2451	279.687	98.4005	279.618	96.4189	279.723	98.5402
280.359	96.2164	280.555	98.3906	280.487	96.4152	280.591	98.544
281.228	96.1869	281.424	98.382	281.358	96.4061	281.459	98.5461
282.097	96.1553	282.292	98.3754	282.23	96.3914	282.326	98.5472
282.967	96.1199	283.161	98.3715	283.101	96.372	283.19	98.5482
283.839	96.0796	284.027	98.3702	283.97	96.3507	284.057	98.5502
284.707	96.034	284.894	98.3711	284.838	96.3307	284.924	98.5538
285.577	95.9846	285.76	98.3734	285.704	96.3152	285.788	98.559
286.443	95.9337	286.627	98.3761	286.573	96.3054	286.653	98.5652
287.313	95.8845	287.494	98.3783	287.44	96.3013	287.522	98.571
288.184	95.8399	288.361	98.3793	288.306	96.3012	288.39	98.5754
289.052	95.8022	289.228	98.3791	289.171	96.3034	289.256	98.5774
289.92	95.7722	290.092	98.3778	290.036	96.3064	290.124	98.5772
290.786	95.7492	290.954	98.3761	290.903	96.3097	290.99	98.5755
291.655	95.7307	291.818	98.3744	291.769	96.3135	291.861	98.5739
292.524	95.7129	292.685	98.3734	292.635	96.3182	292.727	98.5741
293.395	95.6912	293.551	98.3729	293.503	96.3235	293.593	98.5768
294.263	95.6614	294.415	98.373	294.372	96.3287	294.455	98.5815
295.131	95.6209	295.278	98.3734	295.242	96.3321	295.32	98.5864
295.998	95.569	296.141	98.3736	296.108	96.3319	296.184	98.589
296.867	95.5074	297.005	98.373	296.972	96.3264	297.045	98.5869
297.736	95.4391	297.87	98.3713	297.835	96.315	297.907	98.5787
298.603	95.3677	298.733	98.3677	298.699	96.2976	298.772	98.5646
299.47	95.2962	299.599	98.3622	299.564	96.2751	299.638	98.5464
300.336	95.2271	300.465	98.3548	300.428	96.2491	300.505	98.5269
301.204	95.1616	301.329	98.3459	301.292	96.2213	301.37	98.5094
302.071	95.0997	302.195	98.3363	302.155	96.1931	302.234	98.4961
302.94	95.0406	303.059	98.3272	303.021	96.1658	303.098	98.488
303.807	94.9829	303.922	98.3195	303.887	96.1407	303.961	98.4849
304.675	94.9246	304.787	98.3144	304.755	96.1193	304.82	98.4852
305.543	94.8637	305.651	98.3125	305.622	96.1029	305.679	98.4871
306.411	94.7986	306.514	98.3136	306.488	96.0929	306.539	98.4892
307.278	94.7284	307.376	98.3173	307.352	96.0896	307.402	98.4907
308.144	94.6524	308.239	98.3226	308.215	96.0923	308.268	98.4915
309.009	94.5707	309.101	98.3281	309.081	96.0994	309.134	98.4918
309.874	94.4839	309.964	98.3326	309.947	96.1086	309.997	98.4919
310.738	94.3933	310.828	98.3353	310.809	96.1176	310.861	98.4922
311.607	94.3006	311.691	98.3357	311.669	96.1247	311.725	98.4928
312.476	94.2076	312.556	98.334	312.533	96.129	312.586	98.4935
313.346	94.1159	313.418	98.3307	313.398	96.1301	313.449	98.4944
314.213	94.0261	314.284	98.3265	314.263	96.128	314.311	98.4955
315.08	93.9378	315.149	98.3217	315.127	96.1227	315.173	98.4968
315.948	93.8497	316.013	98.3167	315.991	96.1141	316.035	98.4985
316.816	93.7596	316.874	98.3111	316.854	96.1021	316.9	98.5004
317.682	93.6654	317.736	98.3042	317.718	96.0869	317.764	98.5019
318.549	93.5649	318.6	98.2952	318.584	96.0695	318.626	98.5021
319.417	93.4567	319.466	98.284	319.445	96.0513	319.488	98.5
320.285	93.3403	320.329	98.2707	320.305	96.0342	320.351	98.4951
321.151	93.2161	321.19	98.2562	321.168	96.0202	321.214	98.4882
322.015	93.0854	322.052	98.242	322.031	96.0105	322.077	98.4809
322.882	92.9504	322.912	98.2293	322.896	96.0055	322.939	98.4753
323.75	92.8138	323.773	98.2196	323.758	96.0043	323.8	98.4732
324.616	92.6784	324.632	98.2134	324.62	96.0053	324.66	98.4752
325.479	92.5467	325.494	98.2111	325.483	96.0067	325.518	98.4805
326.34	92.4201	326.357	98.2121	326.342	96.0068	326.379	98.4872
327.206	92.2979	327.221	98.2156	327.203	96.0047	327.24	98.4931
328.072	92.1779	328.085	98.2201	328.065	96.0002	328.101	98.4965
328.938	92.0565	328.946	98.2243	328.928	95.994	328.963	98.4962
329.803	91.9297	329.808	98.2271	329.789	95.987	329.825	98.4923
330.67	91.7944	330.67	98.228	330.651	95.9804	330.686	98.4859
331.535	91.6494	331.531	98.2271	331.515	95.9751	331.548	98.4787
332.399	91.4953	332.39	98.2248	332.38	95.9711	332.411	98.4725
333.263	91.3341	333.251	98.2218	333.244	95.9677	333.273	98.4691
334.127	91.1684	334.11	98.2182	334.101	95.9635	334.133	98.4693
334.991	91.0002	334.972	98.2138	334.961	95.9566	334.995	98.4731
335.855	90.8307	335.833	98.2083	335.824	95.9455	335.858	98.4796
336.72	90.6596	336.694	98.201	336.686	95.9297	336.717	98.4873
337.587	90.4856	337.554	98.1918	337.548	95.9099	337.576	98.4946
338.45	90.307	338.418	98.1813	338.408	95.8881	338.436	98.5001
339.314	90.1223	339.278	98.1702	339.268	95.8668	339.294	98.5028
340.176	89.931	340.137	98.16	340.129	95.8483	340.153	98.5027
341.039	89.7334	340.996	98.1515	340.992	95.834	341.014	98.4997
341.901	89.5314	341.858	98.1457	341.855	95.8243	341.875	98.4945
342.763	89.327	342.72	98.1427	342.716	95.8184	342.736	98.4879
343.624	89.1226	343.579	98.1422	343.578	95.8152	343.597	98.4811
344.488	88.9202	344.434	98.1437	344.438	95.8134	344.459	98.4754
345.35	88.7206	345.29	98.1468	345.3	95.8118	345.319	98.4719
346.211	88.524	346.152	98.1508	346.161	95.8095	346.177	98.4711
347.071	88.3294	347.015	98.1553	347.023	95.8058	347.035	98.4732
347.933	88.1352	347.875	98.1602	347.883	95.8003	347.896	98.4773
348.797	87.9389	348.733	98.1651	348.741	95.7928	348.756	98.4823
349.657	87.7374	349.593	98.1697	349.599	95.7836	349.617	98.4871
350.518	87.5274	350.453	98.1735	350.458	95.7733	350.476	98.4908
351.378	87.3063	351.312	98.1755	351.318	95.7625	351.335	98.4932
352.239	87.0725	352.171	98.1753	352.18	95.7517	352.194	98.4941
353.098	86.8261	353.031	98.1722	353.041	95.7409	353.053	98.4935
353.958	86.5699	353.893	98.1661	353.903	95.7299	353.913	98.4912
354.82	86.3082	354.755	98.1572	354.764	95.7184	354.773	98.487
355.681	86.0467	355.613	98.1464	355.625	95.7064	355.635	98.4812
356.539	85.7909	356.469	98.1347	356.484	95.6946	356.493	98.4738
357.397	85.5446	357.328	98.1234	357.344	95.6841	357.352	98.4657
358.252	85.309	358.19	98.1135	358.204	95.6761	358.211	98.4579
359.11	85.0824	359.052	98.1056	359.063	95.6712	359.07	98.4514
359.969	84.8615	359.911	98.0997	359.921	95.6694	359.932	98.447
360.83	84.6421	360.771	98.095	360.781	95.6698	360.787	98.4447
361.689	84.4207	361.631	98.0908	361.639	95.6706	361.642	98.444
362.546	84.1951	362.49	98.0863	362.498	95.6701	362.501	98.444
363.401	83.9648	363.349	98.0814	363.358	95.6669	363.362	98.4438
364.254	83.7304	364.208	98.0761	364.217	95.6599	364.222	98.443
365.108	83.4932	365.062	98.071	365.076	95.6492	365.083	98.4415
365.962	83.2556	365.919	98.0667	365.936	95.635	365.944	98.44
366.817	83.0199	366.778	98.0636	366.798	95.6184	366.802	98.4391
367.671	82.7884	367.636	98.0615	367.658	95.6013	367.659	98.4396
368.524	82.5619	368.495	98.0603	368.516	95.5852	368.518	98.4416
369.379	82.3399	369.352	98.0593	369.376	95.5721	369.375	98.4448
370.235	82.1202	370.209	98.0581	370.235	95.5628	370.23	98.4485
371.09	81.8998	371.066	98.0565	371.095	95.5576	371.086	98.4516
371.946	81.6762	371.924	98.0545	371.953	95.5557	371.945	98.4532
372.801	81.4488	372.784	98.052	372.811	95.5556	372.807	98.4527
373.659	81.2185	373.643	98.0495	373.67	95.5554	373.668	98.4501
374.519	80.9879	374.503	98.0473	374.528	95.5537	374.525	98.446
375.378	80.7597	375.36	98.0458	375.386	95.5492	375.383	98.4412
376.234	80.5355	376.218	98.0453	376.245	95.5414	376.241	98.4367
377.094	80.315	377.076	98.046	377.105	95.5304	377.097	98.433
377.954	80.0966	377.935	98.0474	377.965	95.5165	377.954	98.4303
378.813	79.8778	378.792	98.049	378.825	95.5005	378.812	98.428
379.669	79.6561	379.647	98.0497	379.683	95.483	379.669	98.4261
380.525	79.4299	380.505	98.0487	380.543	95.4652	380.529	98.4246
381.381	79.1983	381.366	98.0458	381.403	95.448	381.392	98.4239
382.237	78.9608	382.228	98.0411	382.261	95.4322	382.252	98.4245
383.096	78.7167	383.087	98.0352	383.118	95.4183	383.109	98.4269
383.957	78.4658	383.945	98.0288	383.975	95.4065	383.965	98.4308
384.817	78.2083	384.801	98.0225	384.831	95.3967	384.822	98.4356
385.676	77.9451	385.655	98.0168	385.69	95.3888	385.68	98.4403
386.536	77.6781	386.512	98.0121	386.549	95.3827	386.538	98.4441
387.397	77.4096	387.369	98.0086	387.408	95.3787	387.396	98.4464
388.258	77.1416	388.228	98.0067	388.266	95.3775	388.255	98.447
389.12	76.8748	389.086	98.0066	389.125	95.3795	389.115	98.446
389.981	76.6087	389.945	98.0082	389.982	95.3851	389.975	98.4443
390.843	76.3414	390.803	98.0115	390.842	95.3938	390.832	98.4426
391.702	76.0714	391.662	98.0162	391.7	95.4043	391.688	98.4419
392.563	75.7972	392.521	98.0223	392.558	95.4147	392.547	98.4428
393.422	75.5189	393.38	98.0297	393.416	95.4224	393.406	98.4457
394.282	75.2373	394.238	98.0384	394.276	95.4251	394.263	98.4506
395.143	74.9536	395.096	98.0477	395.135	95.4218	395.121	98.457
396.004	74.6679	395.952	98.0563	395.992	95.4128	395.98	98.4639
396.866	74.3787	396.81	98.0628	396.849	95.4001	396.838	98.4704
397.728	74.0828	397.669	98.0656	397.709	95.3868	397.695	98.4752
398.594	73.776	398.527	98.0639	398.568	95.3756	398.553	98.4774
399.456	73.4543	399.384	98.0582	399.425	95.3684	399.412	98.4764
400.319	73.115	400.242	98.0499	400.282	95.3658	400.271	98.4723
401.182	72.7579	401.099	98.0413	401.141	95.3666	401.13	98.4657
402.043	72.3849	401.957	98.0345	402.002	95.3691	401.987	98.4583
402.908	71.9997	402.817	98.031	402.861	95.3716	402.843	98.4515
403.774	71.6062	403.675	98.0311	403.721	95.3727	403.702	98.447
404.639	71.2075	404.533	98.0342	404.581	95.3722	404.56	98.4459
405.504	70.8051	405.391	98.0391	405.437	95.3708	405.42	98.4489
406.367	70.3981	406.248	98.0446	406.293	95.3694	406.279	98.4558
407.229	69.9845	407.105	98.0498	407.15	95.3691	407.135	98.4655
408.096	69.5613	407.963	98.0542	408.008	95.3705	407.99	98.4764
408.961	69.126	408.822	98.0578	408.866	95.3733	408.847	98.4868
409.827	68.6768	409.681	98.0605	409.725	95.3762	409.707	98.4948
410.691	68.2131	410.54	98.0621	410.585	95.3773	410.566	98.4993
411.559	67.7343	411.397	98.0621	411.443	95.3746	411.423	98.5
412.425	67.2407	412.254	98.0602	412.302	95.3669	412.282	98.4977
413.291	66.7322	413.11	98.0562	413.159	95.3538	413.141	98.4941
414.156	66.2097	413.966	98.0507	414.019	95.3366	414	98.4909
415.023	65.6743	414.825	98.0447	414.878	95.3174	414.857	98.4892
415.886	65.1275	415.683	98.0393	415.736	95.299	415.714	98.4893
416.749	64.571	416.541	98.0356	416.592	95.2835	416.573	98.4908
417.615	64.0052	417.4	98.0338	417.451	95.2721	417.429	98.4925
418.48	63.4293	418.257	98.0333	418.31	95.2644	418.289	98.4937
419.345	62.8411	419.113	98.0331	419.171	95.2589	419.148	98.4943
420.21	62.2381	419.972	98.0319	420.031	95.2537	420.005	98.4946
421.075	61.6185	420.832	98.0289	420.89	95.2468	420.861	98.4952
421.941	60.9823	421.695	98.0239	421.747	95.237	421.719	98.496
422.804	60.3319	422.554	98.0175	422.603	95.224	422.58	98.4965
423.666	59.6712	423.411	98.0108	423.46	95.2083	423.44	98.4952
424.529	59.0041	424.269	98.0046	424.318	95.1913	424.299	98.4908
425.392	58.3332	425.128	97.9998	425.175	95.1746	425.157	98.4822
426.252	57.6591	425.987	97.9967	426.033	95.1595	426.017	98.4698
427.114	56.9808	426.845	97.9951	426.892	95.1471	426.875	98.4551
427.975	56.2958	427.705	97.9944	427.755	95.1378	427.731	98.4408
428.836	55.602	428.564	97.9942	428.614	95.1315	428.59	98.4301
429.695	54.898	429.424	97.9937	429.47	95.1279	429.45	98.4257
430.555	54.184	430.283	97.9928	430.327	95.1268	430.306	98.4295
431.416	53.4621	431.142	97.9916	431.185	95.1282	431.165	98.4417
432.276	52.7362	432.001	97.9907	432.041	95.1322	432.025	98.4609
433.132	52.0114	432.858	97.9909	432.898	95.1393	432.882	98.4844
433.986	51.2923	433.715	97.993	433.755	95.1496	433.738	98.5082
434.845	50.5812	434.573	97.9973	434.613	95.1621	434.594	98.5285
435.705	49.8766	435.43	98.0033	435.472	95.1756	435.452	98.5423
436.564	49.173	436.287	98.0101	436.333	95.1878	436.31	98.5483
437.42	48.4627	437.143	98.0161	437.189	95.1968	437.171	98.5472
438.277	47.7381	438	98.0203	438.047	95.2013	438.029	98.5414
439.133	46.9944	438.859	98.022	438.904	95.2009	438.886	98.5345
439.99	46.2308	439.718	98.0214	439.762	95.1963	439.743	98.5294
440.844	45.4495	440.58	98.0195	440.621	95.1884	440.6	98.5283
441.698	44.6542	441.439	98.0176	441.481	95.1785	441.458	98.5311
442.553	43.8494	442.297	98.0166	442.342	95.1673	442.319	98.5366
443.408	43.0391	443.156	98.017	443.2	95.1556	443.179	98.5425
444.263	42.2271	444.017	98.0187	444.057	95.1438	444.034	98.5469
445.119	41.4166	444.876	98.021	444.914	95.1322	444.892	98.5489
445.975	40.6093	445.734	98.0231	445.773	95.1213	445.751	98.5488
446.83	39.8054	446.59	98.0242	446.632	95.1115	446.608	98.5482
447.683	39.0029	447.444	98.0242	447.49	95.1032	447.466	98.5488
448.537	38.1983	448.301	98.023	448.348	95.0968	448.325	98.5523
449.39	37.3883	449.159	98.021	449.206	95.0926	449.184	98.559
450.244	36.5708	450.016	98.0185	450.066	95.0906	450.045	98.5686
451.095	35.7457	450.874	98.0158	450.924	95.0905	450.904	98.5797
451.948	34.9145	451.735	98.0131	451.782	95.0916	451.761	98.5907
452.801	34.0795	452.594	98.0103	452.641	95.0932	452.617	98.5996
453.656	33.2424	453.453	98.0071	453.499	95.0946	453.475	98.6051
454.51	32.4041	454.31	98.0035	454.357	95.0951	454.336	98.6061
455.364	31.5641	455.168	97.9994	455.214	95.0945	455.196	98.6026
456.219	30.7214	456.03	97.9952	456.073	95.093	456.054	98.5954
457.07	29.875	456.891	97.9913	456.933	95.091	456.91	98.586
457.921	29.0256	457.75	97.9881	457.793	95.089	457.767	98.5762
458.775	28.1755	458.608	97.9854	458.654	95.0876	458.626	98.5679
459.627	27.3293	459.464	97.9833	459.513	95.0868	459.485	98.5627
460.479	26.4926	460.322	97.9815	460.371	95.0862	460.342	98.5615
461.326	25.6708	461.181	97.9798	461.23	95.0848	461.199	98.5643
462.172	24.8679	462.04	97.9785	462.089	95.0813	462.059	98.5706
463.016	24.0865	462.899	97.9776	462.947	95.0747	462.919	98.5795
463.86	23.3283	463.758	97.9774	463.804	95.0647	463.777	98.5894
464.701	22.5948	464.62	97.9779	464.662	95.052	464.637	98.5988
465.541	21.8883	465.48	97.9788	465.519	95.0384	465.495	98.6064
466.378	21.2122	466.338	97.98	466.377	95.026	466.356	98.6113
467.211	20.5705	467.193	97.9809	467.233	95.0165	467.217	98.6132
468.04	19.9676	468.05	97.9809	468.091	95.0109	468.076	98.6123
468.866	19.4075	468.909	97.9792	468.951	95.009	468.935	98.6092
469.691	18.8926	469.77	97.9755	469.811	95.0099	469.791	98.6049
470.515	18.4241	470.63	97.9692	470.671	95.0121	470.648	98.6003
471.341	18.0005	471.489	97.9605	471.532	95.0141	471.509	98.5961
472.168	17.6192	472.347	97.9499	472.392	95.0147	472.369	98.593
472.995	17.2765	473.206	97.9384	473.251	95.0135	473.228	98.5916
473.82	16.9684	474.064	97.9275	474.11	95.0104	474.083	98.5919
474.647	16.6918	474.924	97.9183	474.968	95.0056	474.939	98.5942
475.479	16.4443	475.783	97.912	475.825	94.9992	475.797	98.5983
476.311	16.2239	476.641	97.9087	476.682	94.9914	476.655	98.6039
477.146	16.0291	477.5	97.9084	477.542	94.9824	477.515	98.6108
477.983	15.8578	478.359	97.9103	478.404	94.9725	478.377	98.6182
478.821	15.7073	479.217	97.9136	479.265	94.9628	479.236	98.6253
479.663	15.5742	480.077	97.9173	480.123	94.9543	480.091	98.6308
480.508	15.4549	480.935	97.9209	480.98	94.9482	480.946	98.6336
481.351	15.346	481.795	97.9243	481.84	94.9451	481.805	98.6333
482.198	15.2453	482.655	97.9273	482.7	94.9445	482.664	98.63
483.047	15.1516	483.516	97.93	483.559	94.9453	483.523	98.6251
483.897	15.0648	484.374	97.9322	484.419	94.9457	484.384	98.6203
484.747	14.985	485.23	97.9339	485.276	94.9441	485.243	98.6175
485.6	14.912	486.09	97.9345	486.134	94.9398	486.104	98.6178
486.456	14.8454	486.948	97.934	486.993	94.9328	486.965	98.6219
487.312	14.7845	487.806	97.932	487.855	94.9239	487.824	98.6294
488.17	14.7287	488.665	97.9287	488.715	94.9147	488.679	98.6393
489.026	14.6778	489.524	97.9244	489.575	94.9065	489.536	98.6504
489.883	14.632	490.384	97.9191	490.435	94.9005	490.396	98.6614
490.741	14.5919	491.241	97.9132	491.295	94.8971	491.257	98.6713
491.602	14.5578	492.101	97.9067	492.155	94.8962	492.116	98.6796
492.462	14.5295	492.959	97.8995	493.015	94.8972	492.976	98.686
493.322	14.5064	493.82	97.8915	493.874	94.8996	493.833	98.6903
494.185	14.4876	494.679	97.8828	494.732	94.9023	494.693	98.6926
495.049	14.4722	495.541	97.8739	495.59	94.9048	495.553	98.6933
495.913	14.4601	496.401	97.8656	496.448	94.9063	496.414	98.6931
496.778	14.4516	497.26	97.8587	497.305	94.9064	497.274	98.6928
497.642	14.4473	498.119	97.8538	498.165	94.905	498.133	98.6934
498.507	14.4475	498.978	97.8515	499.026	94.9024	498.989	98.6957
499.371	14.4517	499.837	97.8516	499.886	94.8996	499.847	98.7002
500.234	14.4581	500.696	97.8536	500.747	94.8978	500.707	98.707
501.097	14.4643	501.555	97.8568	501.605	94.8981	501.565	98.7158
501.961	14.4678	502.413	97.86	502.465	94.9018	502.426	98.7258
502.827	14.4669	503.271	97.8623	503.322	94.909	503.286	98.7362
503.693	14.4611	504.13	97.8628	504.18	94.919	504.146	98.7461
504.558	14.4512	504.991	97.8606	505.04	94.9306	505.005	98.7548
505.423	14.4391	505.849	97.8555	505.901	94.942	505.864	98.7621
506.291	14.4264	506.706	97.8473	506.759	94.9519	506.72	98.7682
507.156	14.4147	507.561	97.8363	507.617	94.9596	507.579	98.7733
508.02	14.4045	508.421	97.823	508.476	94.9653	508.439	98.7779
508.884	14.3956	509.284	97.8085	509.333	94.9694	509.301	98.7822
509.75	14.3876	510.145	97.7938	510.192	94.9723	510.158	98.7862
510.619	14.3803	511.004	97.78	511.054	94.9738	511.016	98.7896
511.484	14.3739	511.863	97.7681	511.914	94.9734	511.876	98.7923
512.348	14.3692	512.723	97.7584	512.773	94.9701	512.737	98.7941
513.212	14.3669	513.581	97.7507	513.633	94.9633	513.594	98.7953
514.079	14.3671	514.442	97.7441	514.493	94.9532	514.455	98.7964
514.943	14.369	515.304	97.7372	515.353	94.9406	515.314	98.7982
515.806	14.3708	516.167	97.7291	516.213	94.9272	516.174	98.8013
516.671	14.371	517.027	97.7193	517.072	94.9145	517.033	98.806
517.535	14.3684	517.887	97.7083	517.933	94.9043	517.894	98.8118
518.398	14.3628	518.747	97.6971	518.794	94.8976	518.756	98.8181
519.262	14.3553	519.607	97.6869	519.653	94.895	519.617	98.8237
520.126	14.3475	520.466	97.6785	520.511	94.8963	520.477	98.8275
520.993	14.3412	521.328	97.6719	521.372	94.9004	521.337	98.8285
521.86	14.3373	522.189	97.6663	522.234	94.9062	522.195	98.8261
522.724	14.336	523.048	97.6603	523.093	94.9121	523.055	98.82
523.587	14.3361	523.909	97.6526	523.953	94.9172	523.917	98.8105
524.451	14.3359	524.77	97.6424	524.813	94.9209	524.775	98.7985
525.315	14.3336	525.632	97.6294	525.673	94.9231	525.635	98.7849
526.176	14.3278	526.492	97.6137	526.534	94.924	526.494	98.7708
527.04	14.3184	527.351	97.5958	527.393	94.9237	527.352	98.7569
527.905	14.306	528.208	97.576	528.254	94.9217	528.213	98.7436
528.769	14.2924	529.067	97.5543	529.113	94.9177	529.073	98.7311
529.633	14.2795	529.93	97.5306	529.971	94.9113	529.935	98.7196
530.497	14.269	530.79	97.5049	530.83	94.903	530.795	98.7095
531.36	14.2619	531.652	97.4778	531.689	94.894	531.656	98.7013
532.226	14.2581	532.514	97.45	532.549	94.886	532.517	98.6956
533.093	14.2568	533.373	97.4227	533.408	94.88	533.378	98.6929
533.959	14.2567	534.231	97.3972	534.269	94.8766	534.237	98.6932
534.821	14.2562	535.091	97.3742	535.129	94.8752	535.097	98.696
535.682	14.254	535.951	97.3539	535.992	94.8747	535.957	98.7005
536.543	14.2489	536.814	97.336	536.851	94.8738	536.815	98.7053
537.407	14.2409	537.676	97.3195	537.708	94.8717	537.675	98.7094
538.27	14.2302	538.535	97.3034	538.565	94.8682	538.536	98.7124
539.135	14.218	539.397	97.2866	539.427	94.8641	539.399	98.7142
539.997	14.2058	540.258	97.2687	540.29	94.8604	540.26	98.7157
540.86	14.1948	541.118	97.2494	541.148	94.8579	541.121	98.7176
541.723	14.186	541.978	97.2285	542.006	94.857	541.979	98.7201
542.586	14.18	542.84	97.2065	542.866	94.8576	542.839	98.7232
543.448	14.1769	543.702	97.1835	543.731	94.8586	543.699	98.7264
544.312	14.1767	544.563	97.1597	544.594	94.8587	544.562	98.7294
545.177	14.1791	545.423	97.1354	545.454	94.8565	545.423	98.732
546.045	14.184	546.288	97.1109	546.314	94.8514	546.283	98.7345
546.91	14.1911	547.151	97.0864	547.173	94.8433	547.145	98.737
547.775	14.2001	548.012	97.0618	548.032	94.8331	548.006	98.7397
548.639	14.2107	548.87	97.0367	548.893	94.822	548.865	98.7422
549.502	14.2227	549.73	97.0106	549.756	94.8118	549.724	98.7445
550.364	14.2363	550.591	96.9827	550.616	94.8035	550.584	98.7465
551.228	14.2513	551.455	96.9527	551.477	94.7978	551.442	98.7488
552.092	14.2673	552.316	96.9203	552.337	94.7948	552.302	98.7521
552.953	14.2836	553.177	96.8859	553.196	94.7936	553.165	98.7572
553.815	14.2991	554.038	96.8499	554.058	94.7937	554.027	98.7645
554.681	14.3125	554.901	96.813	554.918	94.7943	554.89	98.7743
555.545	14.3228	555.763	96.7756	555.779	94.7954	555.751	98.7862
556.411	14.3293	556.624	96.7382	556.638	94.7973	556.612	98.7995
557.276	14.3322	557.484	96.7007	557.498	94.8002	557.472	98.8132
558.142	14.3319	558.345	96.6628	558.357	94.8042	558.333	98.8262
559.004	14.3301	559.204	96.6236	559.219	94.8088	559.193	98.8374
559.869	14.3288	560.065	96.5827	560.08	94.8128	560.053	98.8459
560.735	14.3299	560.926	96.5395	560.941	94.8149	560.914	98.851
561.599	14.3346	561.787	96.4943	561.803	94.8137	561.776	98.8527
562.462	14.3427	562.65	96.4475	562.664	94.8091	562.638	98.8516
563.325	14.3528	563.512	96.4	563.524	94.802	563.503	98.8488
564.188	14.3631	564.375	96.3525	564.383	94.7944	564.364	98.8462
565.052	14.3717	565.237	96.3051	565.245	94.7892	565.225	98.8456
565.915	14.3781	566.101	96.2575	566.105	94.7887	566.085	98.8483
566.78	14.3829	566.962	96.2093	566.965	94.7941	566.944	98.8544
567.644	14.3875	567.826	96.1596	567.828	94.805	567.803	98.863
[truncated: 729 more rows]

## Sheet: Fig2(e)
Temperature	DSC	Temperature	DSC	Temperature	DSC	Temperature	DSC
[truncated: 1,346 more rows]

[truncated: 21 more sheets: Fig2(f), Fig2(g), Fig2(h), Fig2(i), Fig5(a), Fig5(b), Fig5(c）, Fig5(d）, Fig5(e）, Fig5(f）, Fig5(g）, Fig5(h）, Fig6(a）, Fig6(b）, Fig6(c）, Fig6(d）, Fig7(a）, Fig7(b）, Fig7(c）, Fig7(d） …]
